# Supplementary material
Source: PubMed Central journal article supplement (PMC2486301)
Supplement: pbio.0060177.sg001.pdf [file pbio.0060177.sg001.pdf]

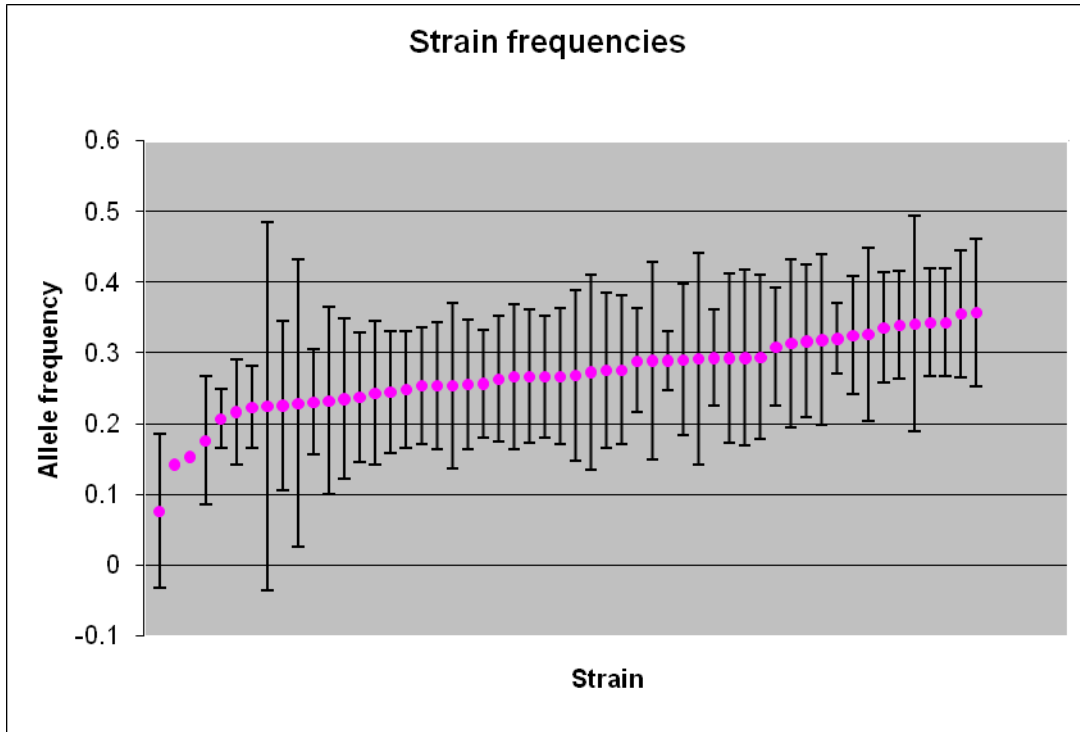

Figure S1: Frequencies of strains observed in the 5-way CG *Leptospirillum* group II population, calculated from the average allele frequency for each polymorphism occurring in a strain relative to the dominant population. Strains are sorted in ascending order of allele frequency. Error bars show  $\pm 1$  standard deviation. Each point represents one strain.
