# Supplementary material
Source: PubMed Central journal article supplement (PMC2486301)
Supplement: pbio.0060177.st001.pdf [file pbio.0060177.st001.pdf]

Table S1

Assembly of the genome of *Leptospirillum* group II from the 5-way CG location of the Richmond Mine (sample collected March 2002, as described by Tyson et al. 2004). The manually curated assembly (columns A to F) is compared with the draft assembly reported by Tyson et al. (column G). Red bars separate genome fragments for which linkage has been established. Blue bars indicate the positions of major strain variant sequences (shown at end).

| contig #          | gene # | Locus_Tag     | Product description                                | Length aa | Position on Phrap contig | Gene number<br>(Tyson et al. 2004) |
|-------------------|--------|---------------|----------------------------------------------------|-----------|--------------------------|------------------------------------|
| Main genome path: |        |               |                                                    |           |                          |                                    |
| 9398              | 1      | CGL2_09398001 | Putative cobyrinic acid a,c-diamide synthase       | 248       | 157..900                 | 245_GENE_16                        |
| 9398              | 2      | CGL2_09398002 | ParB-like partition protein                        | 313       | 1047..1985               | 245_GENE_15                        |
| 10284             | 1      | CGL2_10284001 | Transcriptional regulator, HxIR family             | 111       | complement(680..1012)    | 245_GENE_14                        |
| 10284             | 2      | CGL2_10284002 | NADPH:quinone reductase 1 (EC 1.6.5.5)             | 330       | 1184..2173               | 245_GENE_12                        |
| 10284             | 3      | CGL2_10284003 | Hypothetical protein                               | 69        | 2151..2357               | 245_GENE_11                        |
| 10284             | 4      | CGL2_10284004 | Hypothetical protein                               | 52        | 2483..2638               | 245_GENE_10                        |
| 10284             | 5      | CGL2_10284005 | DNA methyltransferase                              | 350       | 2661..3710               | 245_GENE_9                         |
| 10284             | 6      | CGL2_10284006 | type II restriction endonuclease                   | 241       | 3719..4441               | 245_GENE_8                         |
| 10284             | 7      | CGL2_10284007 | isonitrile hydratase                               | 268       | 4475..5278               | 245_GENE_7                         |
| 10284             | 8      | CGL2_10284008 | Hypothetical protein                               | 68        | 5385..5588               | 245_GENE_6                         |
| 10284             | 9      | CGL2_10284009 | short-chain dehydrogenase                          | 248       | 5576..6319               | 245_GENE_5                         |
| 10284             | 10     | CGL2_10284010 | Putative phospholipid/glycerol acyltransferase     | 178       | complement(6332..6865)   | 245_GENE_4                         |
| 10284             | 11     | CGL2_10284011 | Probable conjugal transfer protein (TraB)          | 373       | complement(7031..8149)   | 245_GENE_3                         |
| 7472              | 2      | CGL2_07472002 | Probable conjugal transfer protein (TraF)          | 175       | complement(1816..2340)   | 245_GENE_2                         |
| 7472              | 1      | CGL2_07472001 | Putative diguanylate phosphodiesterase             | 256       | complement(1040..1807)   | 245_GENE_1                         |
| 8228              | 1      | CGL2_08228001 | Hypothetical protein                               | 91        | 40..312                  | 1147_GENE_3a                       |
| 8228              | 2      | CGL2_08228002 | DNA topoisomerase III (EC 5.99.1.2)                | 684       | 320..2371                | 1147_GENE_3                        |
| 8228              | 3      | CGL2_08228003 | Protein of unknown function                        | 139       | 2334..2750               | 1147_GENE_2                        |
| 8228              | 4      | CGL2_08228004 | Hypothetical protein                               | 95        | 2807..3091               | 1147_GENE_1                        |
| 8228              | 5      | CGL2_08228005 | Single-strand DNA-binding protein                  | 133       | 3091..3489               |                                    |
| 8228              | 6      | CGL2_08228006 | Hypothetical protein                               | 16        | 3531..3578               |                                    |
| 6046              | 1      | CGL2_06046001 | ssDNA binding protein                              | 139       | 130..546                 | 751_GENE_1                         |
| 6046              | 2      | CGL2_06046002 | Hypothetical protein                               | 78        | 609..842                 | 751_GENE_2                         |
| 6046              | 3      | CGL2_06046003 | DNA repair proteins (RadC)                         | 146       | 829..1266                | 751_GENE_3                         |
| 9933              | 1      | CGL2_09933001 | Conserved hypothetical protein                     | 298       | 287..1180                | 751_GENE_4                         |
| 9933              | 2      | CGL2_09933002 | Protein of unknown function                        | 96        | complement(1350..1637)   | 751_GENE_5                         |
| 9933              | 3      | CGL2_09933003 | Conserved hypothetical protein                     | 368       | complement(1867..2970)   | 751_GENE_6                         |
| 9207              | 1      | CGL2_09207001 | HD-GYP hydrolase domain protein/response regulator | 206       | 116..733                 | 259_GENE_12                        |
| 9207              | 3      | CGL2_09207003 | Hypothetical protein                               | 107       | complement(1116..1436)   | 259_GENE_10                        |

|           |    |                |                                                     |     |                          |             |
|-----------|----|----------------|-----------------------------------------------------|-----|--------------------------|-------------|
| 9933      | 4  | CGL2_09933004  | Protein of unknown function                         | 154 | complement(2970..3431)   | 259_GENE_9  |
| 9933      | 5  | CGL2_09933005  | Putative conjugal transfer protein (TrbI)           | 425 | complement(3434..4708)   | 259_GENE_8  |
| 9933      | 6  | CGL2_09933006  | Putative conjugal transfer protein (TrbG)           | 312 | complement(4708..5643)   | 259_GENE_7  |
| 9933      | 7  | CGL2_09933007  | Probable conjugal transfer protein (TrbF)           | 221 | complement(5643..6305)   | 259_GENE_6  |
| 9933      | 8  | CGL2_09933008  | Probable conjugal transfer protein (TrbL)           | 454 | complement(6308..7669)   | 259_GENE_5  |
| 8831      | 1  | CGL2_08831001  | Probable conjugal transfer (TrbJ)                   | 288 | complement(349..1212)    | 259_GENE_4  |
| 8831      | 2  | CGL2_08831002  | Probable conjugal transfer protein (TrbE)           | 812 | complement(1230..3665)   | 259_GENE_2  |
| 8831      | 3  | CGL2_08831003  | Putative conjugal transfer protein (TrbD)           | 104 | complement(3668..3979)   | 259_GENE_1  |
| 8831      | 4  | CGL2_08831004  | Hypothetical protein                                | 102 | complement(3983..4288)   |             |
| 8831      | 5  | CGL2_08831005  | Putative conjugal transfer protein (TrbB)           | 168 | complement(4288..4791)   | 440_GENE_3  |
| 11226     | 1  | CGL2_11226001  | Putative plasmid transfer factor (TraG)             | 65  | complement(240..434)     | 440_GENE_5  |
| 11226     | 2  | CGL2_11226002  | Hypothetical protein                                | 166 | 595..1092                | 582_GENE_1  |
| 11226     | 3  | CGL2_11226003  | Hypothetical protein                                | 64  | 1103..1294               | 582_GENE_2  |
| 11226     | 4  | CGL2_11226004  | Hypothetical protein                                | 141 | 1294..1716               | 582_GENE_3  |
| 11226     | 5  | CGL2_11226005  | Putative twitching motility protein (PilT)          | 346 | 1716..2753               | 582_GENE_4  |
| 11226     | 6  | CGL2_11226006  | Hypothetical protein                                | 438 | 2753..4066               | 582_GENE_6  |
| 11226     | 7  | CGL2_11226007  | Protein of unknown function                         | 196 | 4069..4656               | 582_GENE_7  |
| 11226     | 8  | CGL2_11226008  | Hypothetical protein                                | 363 | 4656..5744               | 582_GENE_8  |
| 11226     | 9  | CGL2_11226009  | Putative type II secretion system protein D         | 615 | 5822..7666               |             |
| 11226     | 10 | CGL2_11226010  | Putative type II secretion system protein E         | 574 | 7673..9394               |             |
| 11226     | 11 | CGL2_11226011  | Conserved protein of unknown function               | 202 | 9397..10002              |             |
| 11226     | 12 | CGL2_11226012  | Hypothetical protein                                | 160 | complement(10072..10551) |             |
| 11226     | 13 | CGL2_11226013  | Conserved hypothetical protein                      | 101 | complement(10734..11036) | 784_GENE_6  |
| 11226     | 14 | CGL2_11226014  | Conserved hypothetical protein                      | 136 | complement(11106..11513) | 784_GENE_5  |
| 11226     | 15 | CGL2_11226015  | Putative type II secretion system protein F         | 402 | complement(11654..12859) | 1145_GENE_1 |
| 11226     | 16 | CGL2_11226016  | Hypothetical protein                                | 85  | complement(12859..13113) |             |
| 11226     | 17 | CGL2_11226017  | Putative phage integrase                            | 346 | complement(13238..14275) | 784_GENE_2  |
| 11226tRNA |    | CGL2_11226R001 | TRNA Arg CCG                                        |     | complement(14411..14488) |             |
| 11226     | 18 | CGL2_11226018  | Putative Cl-channel, voltage gated                  | 570 | complement(14549..16258) | 283_GENE_8  |
| 11226     | 19 | CGL2_11226019  | Conserved hypothetical protein                      | 144 | complement(16258..16689) | 283_GENE_7  |
| 11226     | 20 | CGL2_11226020  | Hypothetical protein                                | 78  | complement(16881..17114) | 283_GENE_6  |
| 11226     | 21 | CGL2_11226021  | Protoporphyrinogen oxidase (EC 1.3.3.4)             | 462 | 17322..18707             | 283_GENE_5  |
| 11226     | 22 | CGL2_11226022  | Putative metallophosphoesterase                     | 227 | complement(18727..19407) | 283_GENE_4  |
| 11226     | 23 | CGL2_11226023  | Zinc-containing alcohol dehydrogenase superfamily ( | 333 | complement(19436..20434) | 283_GENE_3  |
| 11226     | 24 | CGL2_11226024  | Putative radical SAM family protein                 | 172 | complement(20542..21057) | 283_GENE_2  |
| 11067     | 45 | CGL2_11067045  | Protein of unknown function                         | 108 | complement(53116..53439) | 53_GENE_28  |
| 11067     | 44 | CGL2_11067044  | Probable signal transduction protein                | 277 | complement(52073..52903) | 53_GENE_27  |
| 11067     | 43 | CGL2_11067043  | Conserved protein of unknown function               | 485 | complement(50243..51697) | 53_GENE_26  |
| 11067     | 42 | CGL2_11067042  | Hypothetical protein                                | 496 | complement(48607..50094) | 53_GENE_24  |
| 11067     | 41 | CGL2_11067041  | Conserved protein of unknown function               | 185 | complement(48034..48588) | 53_GENE_23  |
| 11067     | 40 | CGL2_11067040  | Glucokinase (EC 2.7.1.2)                            | 344 | complement(46445..47476) | 53_GENE_22  |

|           |    |                |                                                      |     |                          |             |
|-----------|----|----------------|------------------------------------------------------|-----|--------------------------|-------------|
| 11067     | 39 | CGL2_11067039  | 6-phosphogluconolactonase (EC 3.1.1.31)              | 276 | complement(45477..46304) | 53_GENE_21  |
| 11067     | 38 | CGL2_11067038  | Transketolase (EC 2.2.1.1)                           | 677 | complement(43407..45437) | 53_GENE_20  |
| 11067     | 37 | CGL2_11067037  | Transaldolase                                        | 977 | complement(40415..43345) | 53_GENE_19  |
| 11067     | 36 | CGL2_11067036  | Glucose-6-phosphate 1-dehydrogenase (EC 1.1.1.49)    | 510 | complement(38831..40360) | 53_GENE_18  |
| 11067     | 35 | CGL2_11067035  | Protein of unknown function                          | 582 | complement(37072..38817) | 53_GENE_17  |
| 11067     | 34 | CGL2_11067034  | Putative monooxygenase                               | 414 | complement(35831..37072) | 53_GENE_16  |
| 11067     | 33 | CGL2_11067033  | Probable trigger factor                              | 467 | complement(34231..35631) | 53_GENE_15  |
| 11067     | 32 | CGL2_11067032  | Peptidase S14, ClpP (EC 3.4.21.92)                   | 203 | complement(33595..34203) | 53_GENE_14  |
| 11067     | 31 | CGL2_11067031  | ClpX, ATPase regulatory subunit                      | 426 | complement(32287..33564) | 53_GENE_13  |
| 11067     | 30 | CGL2_11067030  | Protein of unknown function                          | 217 | 31634..32284             | 53_GENE_12  |
| 11067     | 29 | CGL2_11067029  | Protein of unknown function                          | 442 | complement(30241..31566) | 53_GENE_11  |
| 11067     | 28 | CGL2_11067028  | Putative CDP-alcohol phosphatidyltransferase         | 183 | complement(29690..30238) | 53_GENE_10  |
| 11067     | 27 | CGL2_11067027  | Conserved protein of unknown function                | 462 | complement(28288..29673) | 53_GENE_9   |
| 11067     | 26 | CGL2_11067026  | 4-diphosphocytidyl-2-C-methyl-D-erythritol kinase (I | 293 | complement(27410..28288) | 53_GENE_8   |
| 11067tRNA |    | CGL2_11067R006 | TRNA Gln TTG                                         |     | complement(27326..27400) |             |
| 11067     | 25 | CGL2_11067025  | Ribose-phosphate pyrophosphokinase (EC 2.7.6.1)      | 314 | complement(26318..27259) | 53_GENE_7   |
| 11067     | 24 | CGL2_11067024  | Ribosomal protein L25                                | 207 | complement(25636..26256) | 53_GENE_6   |
| 11067     | 23 | CGL2_11067023  | Peptidyl-tRNA hydrolase (EC 3.1.1.29)                | 187 | complement(25054..25614) | 53_GENE_5   |
| 11067     | 22 | CGL2_11067022  | GTP binding protein                                  | 364 | complement(23895..24986) | 53_GENE_4   |
| 11067     | 21 | CGL2_11067021  | Ribosomal protein S6                                 | 122 | complement(23499..23864) | 271_GENE_14 |
| 11067     | 20 | CGL2_11067020  | Single-stranded DNA-binding protein                  | 140 | complement(23080..23499) | 271_GENE_13 |
| 11067     | 19 | CGL2_11067019  | Ribosomal protein S18                                | 76  | complement(22781..23008) | 271_GENE_12 |
| 11067     | 18 | CGL2_11067018  | Hypothetical protein                                 | 289 | complement(21810..22676) | 271_GENE_11 |
| 11067     | 17 | CGL2_11067017  | Rare lipoprotein A family protein                    | 263 | complement(21080..21868) | 271_GENE_10 |
| 11067     | 16 | CGL2_11067016  | Protein of unknown function                          | 74  | complement(20800..21021) | 271_GENE_9  |
| 11067     | 15 | CGL2_11067015  | Conserved hypothetical protein                       | 56  | complement(20626..20793) | 271_GENE_8  |
| 11067     | 14 | CGL2_11067014  | Protein of unknown function                          | 151 | 20162..20614             | 271_GENE_7  |
| 11067     | 13 | CGL2_11067013  | RNA modification enzyme, MiaB family                 | 483 | complement(18599..20047) | 271_GENE_6  |
| 11067     | 12 | CGL2_11067012  | Hypothetical protein                                 | 342 | 17538..18563             | 271_GENE_5  |
| 11067tRNA |    | CGL2_11067R005 | TRNA Leu TAG                                         |     | complement(17410..17495) |             |
| 11067     | 11 | CGL2_11067011  | Putative flavoprotein reductase                      | 379 | complement(16112..17248) | 271_GENE_3  |
| 11067     | 10 | CGL2_11067010  | Protein of unknown function                          | 258 | complement(15336..16109) | 271_GENE_2  |
| 11067tRNA |    | CGL2_11067R004 | TRNA Tyr GTA                                         |     | complement(15070..15155) |             |
| 11067tRNA |    | CGL2_11067R003 | TRNA Gly TCC                                         |     | complement(14959..15033) |             |
| 11067tRNA |    | CGL2_11067R002 | TRNA Thr GGT                                         |     | complement(14860..14935) |             |
| 11067     | 9  | CGL2_11067009  | Translation elongation factor Tu (EC 2.7.7.4)        | 399 | complement(13549..14745) | 137_GENE_1  |
| 11067     | 8  | CGL2_11067008  | Ribosomal protein L33                                | 49  | complement(13372..13518) | 137_GENE_1a |
| 11067tRNA |    | CGL2_11067R001 | TRNA Trp CCA                                         |     | complement(13285..13361) |             |
| 11067     | 7  | CGL2_11067007  | Preprotein translocase (SecE)                        | 69  | complement(13064..13270) |             |
| 11067     | 6  | CGL2_11067006  | Transcription antitermination protein (NusG)         | 184 | complement(12489..13040) | 137_GENE_2  |
| 11067     | 5  | CGL2_11067005  | Ribosomal protein L11                                | 141 | complement(12027..12449) | 137_GENE_3  |

|       |    |                |                                                    |      |                          |             |
|-------|----|----------------|----------------------------------------------------|------|--------------------------|-------------|
| 11067 | 4  | CGL2_11067004  | Ribosomal protein L1                               | 232  | complement(11286..11981) | 137_GENE_4  |
| 11067 | 3  | CGL2_11067003  | Ribosomal protein L10                              | 174  | complement(10762..11283) | 137_GENE_5  |
| 11067 | 2  | CGL2_11067002  | Ribosomal protein L7/L12                           | 128  | complement(10271..10654) | 137_GENE_6  |
| 11067 | 1  | CGL2_11067001  | DNA-directed RNA polymerase, beta subunit (EC 2.7  | 1718 | complement(4756..9909)   | 137_GENE_7  |
| 11067 | 1a | CGL2_11067001a | DNA-directed RNA polymerase, beta' subunit (EC 2.7 | 1574 | complement(30..4751)     | 137_GENE_8  |
| 11212 | 1  | CGL2_11212001  | Ribosomal protein S12                              | 65   | 133..327                 | 713_GENE_4  |
| 11212 | 2  | CGL2_11212002  | Ribosomal protein S7                               | 157  | 368..838                 | 713_GENE_3  |
| 11212 | 3  | CGL2_11212003  | Translation elongation factor G                    | 692  | 854..2929                | 713_GENE_2  |
| 11212 | 4  | CGL2_11212004  | Translation elongation factor Tu (EC 2.7.7.4)      | 399  | 2952..4148               | 713_GENE_1  |
| 11212 | 5  | CGL2_11212005  | Ribosomal protein S10                              | 101  | 4185..4487               |             |
| 11212 | 6  | CGL2_11212006  | Ribosomal protein L3                               | 207  | 4502..5122               | 349_GENE_14 |
| 11212 | 7  | CGL2_11212007  | Ribosomal protein L4                               | 218  | 5147..5800               | 349_GENE_13 |
| 11212 | 8  | CGL2_11212008  | Ribosomal protein L23                              | 95   | 5790..6074               |             |
| 11212 | 9  | CGL2_11212009  | Ribosomal protein L2                               | 273  | 6080..6898               | 349_GENE_12 |
| 11212 | 10 | CGL2_11212010  | Ribosomal protein S19                              | 94   | 6917..7198               | 349_GENE_11 |
| 11212 | 11 | CGL2_11212011  | Ribosomal protein L22                              | 110  | 7223..7552               | 349_GENE_10 |
| 11212 | 12 | CGL2_11212012  | Ribosomal protein S3                               | 226  | 7573..8250               | 349_GENE_9  |
| 11212 | 13 | CGL2_11212013  | Ribosomal protein L16/L10E                         | 127  | 8287..8667               | 349_GENE_8  |
| 11212 | 14 | CGL2_11212014  | Ribosomal protein L29                              | 66   | 8667..8864               | 349_GENE_7a |
| 11212 | 15 | CGL2_11212015  | Ribosomal protein S17                              | 95   | 8860..9144               | 349_GENE_7  |
| 11212 | 16 | CGL2_11212016  | Ribosomal protein L14                              | 122  | 9182..9547               | 349_GENE_6  |
| 11212 | 17 | CGL2_11212017  | Ribosomal protein L24                              | 117  | 9564..9914               | 349_GENE_5a |
| 11212 | 18 | CGL2_11212018  | Ribosomal protein L5                               | 226  | 9946..10623              | 349_GENE_5  |
| 11212 | 19 | CGL2_11212019  | Ribosomal protein S14                              | 61   | 10646..10828             | 349_GENE_4a |
| 11212 | 20 | CGL2_11212020  | Ribosomal protein S8                               | 132  | 10853..11248             | 349_GENE_4  |
| 11212 | 21 | CGL2_11212021  | Ribosomal protein L6P/L9E                          | 179  | 11280..11816             | 349_GENE_3  |
| 11212 | 22 | CGL2_11212022  | Ribosomal protein L18                              | 117  | 11855..12205             | 349_GENE_2  |
| 11212 | 23 | CGL2_11212023  | Ribosomal protein S5                               | 161  | 12234..12716             | 349_GENE_1  |
| 11212 | 24 | CGL2_11212024  | Ribosomal protein L30                              | 63   | 12751..12939             | 88_GENE_20  |
| 11212 | 25 | CGL2_11212025  | Ribosomal protein L15                              | 149  | 12975..13421             | 88_GENE_19  |
| 11212 | 26 | CGL2_11212026  | Preprotein translocase subunit (SecY)              | 437  | 13445..14755             | 88_GENE_18  |
| 11212 | 27 | CGL2_11212027  | Adenylate kinase (EC 2.7.4.3)                      | 219  | 14761..15417             | 88_GENE_17  |
| 11212 | 28 | CGL2_11212028  | Methionine aminopeptidase (EC 3.4.11.18)           | 252  | 15423..16178             | 88_GENE_16  |
| 11212 | 29 | CGL2_11212029  | Translation initiation factor 1 (IF-1)             | 72   | 16191..16406             | 88_GENE_16a |
| 11212 | 30 | CGL2_11212030  | Ribosomal protein L36                              | 37   | 16420..16530             |             |
| 11212 | 31 | CGL2_11212031  | Ribosomal protein S13                              | 124  | 16545..16916             |             |
| 11212 | 32 | CGL2_11212032  | Ribosomal protein S11                              | 128  | 16970..17353             | 88_GENE_15a |
| 11212 | 33 | CGL2_11212033  | Ribosomal protein S4 and related proteins          | 209  | 17410..18036             | 88_GENE_15  |
| 11212 | 34 | CGL2_11212034  | DNA-directed RNA polymerase, alpha subunit (EC 2.7 | 324  | 18083..19054             | 88_GENE_14  |
| 11212 | 35 | CGL2_11212035  | Ribosomal protein L17                              | 154  | 19093..19554             | 88_GENE_13  |
| 11212 | 36 | CGL2_11212036  | Protein of unknown function                        | 143  | 19579..20007             | 88_GENE_12  |

|       |    |               |                                                     |      |                          |            |
|-------|----|---------------|-----------------------------------------------------|------|--------------------------|------------|
| 11212 | 37 | CGL2_11212037 | DTDP-4-dehydrorhamnose reductase (EC 1.1.1.133)     | 288  | 20079..20942             | 88_GENE_11 |
| 11212 | 38 | CGL2_11212038 | Trehalose-6-phosphate phosphatase                   | 285  | complement(20962..21816) | 88_GENE_10 |
| 11212 | 39 | CGL2_11212039 | Alpha,alpha-trehalose-phosphate synthase (UDP-forr  | 500  | complement(21785..23284) | 88_GENE_8  |
| 11212 | 40 | CGL2_11212040 | Putative glycosyl transferase, group 1              | 361  | complement(23326..24408) | 88_GENE_7  |
| 11212 | 41 | CGL2_11212041 | Putative major facilitator superfamily transporter  | 428  | complement(24414..25697) | 88_GENE_6  |
| 11212 | 42 | CGL2_11212042 | Probable macrolide-efflux protein                   | 429  | complement(25851..27137) | 88_GENE_5  |
| 11212 | 43 | CGL2_11212043 | ADP-L-glycero-D-mannoheptose-6-epimerase (EC 5.     | 303  | 27352..28260             | 88_GENE_4  |
| 11212 | 44 | CGL2_11212044 | Protein of unknown function                         | 610  | 28241..30070             | 88_GENE_3  |
| 11212 | 45 | CGL2_11212045 | Amidophosphoribosyltransferase (EC 2.4.2.14)        | 504  | complement(30090..31601) | 88_GENE_2  |
| 11212 | 46 | CGL2_11212046 | Phosphoribosylformylglycinamidine synthase II (EC 6 | 737  | complement(31607..33817) | 88_GENE_1  |
| 11212 | 47 | CGL2_11212047 | Phosphoribosylformylglycinamidine synthase I        | 255  | complement(33924..34688) | 30_GENE_4  |
| 11212 | 48 | CGL2_11212048 | Conserved hypothetical protein                      | 257  | 34948..35718             | 30_GENE_5  |
| 11212 | 49 | CGL2_11212049 | Protein of unknown function                         | 238  | 35917..36630             | 30_GENE_6  |
| 11212 | 50 | CGL2_11212050 | Putative transcriptional regulator, TetR family     | 237  | 36679..37389             | 30_GENE_7  |
| 11212 | 51 | CGL2_11212051 | Putative outer membrane efflux protein              | 490  | 37389..38858             | 30_GENE_8  |
| 11212 | 52 | CGL2_11212052 | Secretion protein (HlyD)                            | 376  | 38854..39981             | 30_GENE_9  |
| 11212 | 53 | CGL2_11212053 | Putative cation/multidrug efflux pump split         | 1070 | 40003..43212             | 30_GENE_10 |
| 11212 | 54 | CGL2_11212054 | Putative transcriptional regulator, LysR family     | 310  | complement(43219..44148) | 30_GENE_11 |
| 11212 | 55 | CGL2_11212055 | Putative outer membrane efflux protein              | 474  | 44343..45764             | 30_GENE_12 |
| 11212 | 56 | CGL2_11212056 | Protein of unknown function                         | 243  | 45764..46492             | 30_GENE_13 |
| 11212 | 57 | CGL2_11212057 | Protein of unknown function                         | 207  | 46534..47154             | 30_GENE_14 |
| 11212 | 58 | CGL2_11212058 | ABC transporter, ATPase subunit (EC 3.6.3.29)       | 256  | 47150..47917             | 30_GENE_15 |
| 11212 | 59 | CGL2_11212059 | Putative ABC-2 transporter                          | 285  | 47913..48767             | 30_GENE_16 |
| 11212 | 60 | CGL2_11212060 | Putative oxidoreductase FAD/NAD(P)-binding          | 257  | 48821..49591             | 30_GENE_17 |
| 11212 | 61 | CGL2_11212061 | Protein of unknown function                         | 346  | 49656..50693             | 30_GENE_18 |
| 11212 | 62 | CGL2_11212062 | Putative 3-hydroxybutyryl-coA dehydrogenase         | 378  | 50707..51840             | 30_GENE_19 |
| 11212 | 63 | CGL2_11212063 | Protein of unknown function                         | 160  | 51915..52394             | 30_GENE_20 |
| 11212 | 63 | CGL2_11212063 | Protein of unknown function                         | 160  | 51915..52394             | 30_GENE_20 |
| 11212 | 65 | CGL2_11212065 | Protein of unknown function                         | 231  | 52537..53229             | 30_GENE_21 |
| 11212 | 66 | CGL2_11212066 | Putative TPR-domain containing protein              | 731  | 53229..55421             | 30_GENE_22 |
| 11212 | 67 | CGL2_11212067 | Putative DegT/DnrJ/EryC1/StrS aminotransferase      | 391  | 55443..56615             | 30_GENE_23 |
| 11212 | 68 | CGL2_11212068 | Putative OsmC-like protein (osmotic induced)        | 173  | 56615..57133             | 30_GENE_24 |
| 11212 | 69 | CGL2_11212069 | Probable dethiobiotin synthase                      | 237  | 57085..57795             | 30_GENE_25 |
| 11212 | 70 | CGL2_11212070 | Protein of unknown function                         | 110  | complement(57853..58182) | 30_GENE_26 |
| 11212 | 71 | CGL2_11212071 | Protein of unknown function                         | 68   | complement(58263..58466) | 30_GENE_27 |
| 11212 | 72 | CGL2_11212072 | Protein of unknown function                         | 284  | complement(58472..59323) | 30_GENE_28 |
| 11212 | 73 | CGL2_11212073 | Protein of unknown function                         | 350  | complement(59348..60397) | 30_GENE_29 |
| 11212 | 74 | CGL2_11212074 | Protein of unknown function                         | 107  | complement(60412..60732) | 30_GENE_30 |
| 11212 | 75 | CGL2_11212075 | Multi-sensor signal transduction histidine kinase   | 596  | 61548..63335             | 30_GENE_31 |
| 11212 | 76 | CGL2_11212076 | Putative response regulator receiver protein        | 148  | 63416..63859             | 30_GENE_32 |
| 11212 | 77 | CGL2_11212077 | Response regulator receiver modulated diguanylate c | 874  | 63923..66544             | 30_GENE_33 |

|       |     |               |                                                       |     |                            |            |
|-------|-----|---------------|-------------------------------------------------------|-----|----------------------------|------------|
| 11212 | 78  | CGL2_11212078 | Thiamine-phosphate pyrophosphorylase ThiE (EC 2.5.    | 212 | complement(66551..67186)   | 30_GENE_34 |
| 11212 | 79  | CGL2_11212079 | Acetyl-CoA carboxylase, biotin carboxylase (EC 6.3.4  | 456 | complement(67235..68602)   | 30_GENE_35 |
| 11212 | 80  | CGL2_11212080 | Acetyl-CoA biotin carboxyl carrier protein            | 157 | complement(68611..69081)   | 30_GENE_36 |
| 11212 | 81  | CGL2_11212081 | Translation elongation factor P                       | 191 | complement(69131..69703)   | 30_GENE_37 |
| 11212 | 82  | CGL2_11212082 | 3-dehydroquinate dehydratase, type II (EC 4.2.1.10)   | 149 | complement(69771..70217)   | 30_GENE_38 |
| 11212 | 83  | CGL2_11212083 | Putative TPR-domain containing protein                | 464 | complement(70217..71608)   | 30_GENE_39 |
| 11212 | 84  | CGL2_11212084 | DNA/pantothenate metabolism flavoprotein (EC 4.1.     | 415 | complement(71770..73014)   | 30_GENE_40 |
| 11212 | 85  | CGL2_11212085 | Putative DNA-directed RNA polymerase, omega subu      | 134 | complement(73025..73426)   | 30_GENE_41 |
| 11212 | 86  | CGL2_11212086 | Guanylate kinase (EC 2.7.4.8)                         | 243 | complement(73426..74154)   | 30_GENE_42 |
| 11212 | 87  | CGL2_11212087 | Conserved protein of unknown function                 | 94  | complement(74222..74503)   | 30_GENE_43 |
| 11212 | 88  | CGL2_11212088 | Conserved protein of unknown function                 | 293 | complement(74496..75374)   | 30_GENE_44 |
| 11212 | 89  | CGL2_11212089 | Probable amylo-alpha-1,6-glucosidase                  | 725 | 75575..77749               | 30_GENE_45 |
| 11212 | 90  | CGL2_11212090 | Putative penicillin-binding protein, transpeptidase   | 468 | 77964..79367               | 30_GENE_46 |
| 11212 | 91  | CGL2_11212091 | Putative signal-transduction protein with CBS domain  | 136 | 79504..79911               | 317_GENE_7 |
| 11212 | 92  | CGL2_11212092 | 8-amino-7-oxononanoate synthase (EC 2.3.1.47)         | 380 | complement(80007..81146)   | 317_GENE_6 |
| 11212 | 93  | CGL2_11212093 | 6-carboxyhexanoate--CoA ligase (EC 6.2.1.14)          | 300 | complement(81127..82026)   | 317_GENE_5 |
| 11212 | 94  | CGL2_11212094 | Biotin synthetase (EC 2.8.1.6)                        | 346 | complement(82026..83063)   | 317_GENE_4 |
| 11212 | 95  | CGL2_11212095 | Diguanylate cyclase                                   | 412 | 83322..84557               | 317_GENE_3 |
| 11212 | 96  | CGL2_11212096 | transposase                                           | 124 | 85643..86014               | 94_GENE_21 |
| 11212 | 97  | CGL2_11212097 | Glycyl-tRNA synthetase, alpha subunit (EC 6.1.1.14)   | 300 | 86421..87320               | 94_GENE_20 |
| 11212 | 98  | CGL2_11212098 | Glycyl-tRNA synthetase, beta subunit (EC 6.1.1.14)    | 739 | 87320..89536               | 94_GENE_19 |
| 11212 | 99  | CGL2_11212099 | Riboflavin biosynthesis protein RibD (EC 3.5.4.26) (E | 388 | 89539..90702               | 94_GENE_18 |
| 11212 | 100 | CGL2_11212100 | Riboflavin synthase, alpha subunit                    | 210 | 90709..91338               | 94_GENE_17 |
| 11212 | 101 | CGL2_11212101 | Hypothetical protein                                  | 67  | 91354..91554               | 94_GENE_16 |
| 11212 | 102 | CGL2_11212102 | Cobalt-precorrin-2 C(20)-methyltransferase (EC 2.1.   | 251 | 91554..92306               | 94_GENE_15 |
| 11212 | 103 | CGL2_11212103 | Hypothetical protein                                  | 179 | 92306..92842               | 94_GENE_14 |
| 11212 | 104 | CGL2_11212104 | Precorrin-4 C11-methyltransferase (EC 2.1.1.133)      | 279 | 92829..93665               | 94_GENE_13 |
| 11212 | 105 | CGL2_11212105 | Protein of unknown function (transcription reg?)      | 179 | complement(93823..94359)   | 94_GENE_12 |
| 11212 | 106 | CGL2_11212106 | Protein of unknown function                           | 221 | complement(94513..95175)   | 94_GENE_11 |
| 11212 | 107 | CGL2_11212107 | Putative radical SAM family protein                   | 476 | complement(95203..96630)   | 94_GENE_10 |
| 11212 | 108 | CGL2_11212108 | Cation efflux family protein                          | 315 | 96844..97788               | 94_GENE_9  |
| 11212 | 109 | CGL2_11212109 | Conserved hypothetical protein                        | 112 | complement(97802..98137)   | 94_GENE_8  |
| 11212 | 110 | CGL2_11212110 | Putative DNA recombination protein, RmuC family       | 477 | complement(98137..99567)   | 94_GENE_7  |
| 11212 | 111 | CGL2_11212111 | Dihydroxy-acid dehydratase (EC 4.2.1.9)               | 557 | complement(99607..101277)  | 94_GENE_6  |
| 11212 | 112 | CGL2_11212112 | Protein of unknown function                           | 183 | complement(101476..102024) | 94_GENE_5  |
| 11212 | 113 | CGL2_11212113 | Hypothetical protein                                  | 59  | complement(102073..102249) | 94_GENE_4  |
| 11212 | 114 | CGL2_11212114 | Cobyric acid synthase (CobQ)                          | 500 | 102394..103893             | 94_GENE_3  |
| 11212 | 115 | CGL2_11212115 | Cobalamin biosynthesis protein (CbiB)                 | 338 | 103893..104906             | 94_GENE_2  |
| 11212 | 116 | CGL2_11212116 | Putative L-threonine-O-3-phosphate decarboxylase      | 369 | 104913..106019             | 94_GENE_1  |
| 11212 | 117 | CGL2_11212117 | Fumarate hydratase class II (EC 4.2.1.2)              | 471 | 106493..107905             | 57_GENE_26 |

| 11212tRNA | CGL2_11212R001 | TRNA Pro CGG                                                             | 108074..108150                             |
|-----------|----------------|--------------------------------------------------------------------------|--------------------------------------------|
| 11212     | 118            | CGL2_11212118 Putative acylphosphatase                                   | 99 108264..108560 57_GENE_24               |
| 11212     | 119            | CGL2_11212119 RNA polymerase, RpoD-like sigma subunit                    | 499 108623..110119 57_GENE_23              |
| 11212     | 120            | CGL2_11212120 Conserved protein of unknown function                      | 110 110125..110454 57_GENE_22              |
| 11212     | 121            | CGL2_11212121 Glutamate synthase [NADPH] large subunit (EC 1.4.1.13)     | 1525 complement(110573..115147) 57_GENE_21 |
| 11212     | 122            | CGL2_11212122 Putative metal dependent phosphohydrolase                  | 332 115413..116408 57_GENE_20              |
| 11212     | 123            | CGL2_11212123 D-lactate dehydrogenase (Cytochrome) (EC 1.1.2.4)          | 945 116408..119242 57_GENE_19              |
| 11212     | 124            | CGL2_11212124 Putative methyl-accepting chemotaxis sensory transducer    | 372 complement(119251..120366) 57_GENE_18  |
| 11212     | 125            | CGL2_11212125 Probable acyl-[acyl-carrier protein] desaturase            | 286 complement(120700..121557) 57_GENE_17  |
| 11212     | 126            | CGL2_11212126 Exodeoxyribonuclease III (EC 3.1.11.2)                     | 265 complement(121793..122587) 57_GENE_16  |
| 11212     | 127            | CGL2_11212127 Probable cation transport protein                          | 181 complement(122580..123122) 57_GENE_15  |
| 11212     | 128            | CGL2_11212128 3-methyl-2-oxobutanoate hydroxymethyltransferase           | 287 complement(123127..123987) 57_GENE_14  |
| 11212     | 129            | CGL2_11212129 Putative methylenetetrahydrofolate reductase               | 289 complement(123993..124859) 57_GENE_13  |
| 11212     | 130            | CGL2_11212130 Methenyltetrahydrofolate cyclohydrolase (EC 3.5.4.9)       | 294 complement(124859..125740) 57_GENE_12  |
| 11212     | 131            | CGL2_11212131 GTP cyclohydrolase I (EC 3.5.4.16)                         | 191 complement(125824..126396) 57_GENE_11  |
| 11212     | 132            | CGL2_11212132 Putative 5-formyltetrahydrofolate cyclo-ligase             | 206 complement(126377..126994) 57_GENE_10  |
| 11212     | 133            | CGL2_11212133 Probable citrate transporter                               | 633 127016..128914 57_GENE_9               |
| 11212     | 134            | CGL2_11212134 Putative acyltransferase                                   | 232 complement(128922..129617) 57_GENE_8   |
| 11212     | 135            | CGL2_11212135 Cytidylate kinase (EC 2.7.4.14)                            | 221 complement(129593..130255) 57_GENE_7   |
| 11212     | 136            | CGL2_11212136 3-phosphoshikimate 1-carboxyvinyltransferase (EC 2.3.1.24) | 454 complement(130252..131613) 57_GENE_6   |
| 11212     | 138            | CGL2_11212138 Prephenate dehydrogenase (EC 1.3.1.12)                     | 302 complement(131600..132505) 57_GENE_5   |
| 11212     | 139            | CGL2_11212139 Phospho-2-dehydro-3-deoxyheptonate aldolase, subunit A     | 340 complement(132505..133524) 57_GENE_4   |
| 11212     | 140            | CGL2_11212140 Prephenate dehydratase (EC 4.2.1.51)                       | 365 complement(133548..134642) 57_GENE_3   |
| 11212     | 141            | CGL2_11212141 Conserved protein of unknown function                      | 252 complement(134731..135486) 57_GENE_2   |
| 11212     | 142            | CGL2_11212142 Probable cytochrome C oxidase mono-heme subunit            | 176 135909..136436 120_GENE_14             |
| 11212     | 143            | CGL2_11212143 Conserved hypothetical protein                             | 429 136596..137882 120_GENE_13             |
| 11212     | 144            | CGL2_11212144 Glycine oxidase (ThiO)                                     | 375 complement(137898..139022) 120_GENE_12 |
| 11212     | 145            | CGL2_11212145 UDP-glucose 6-dehydrogenase (EC 1.1.1.22)                  | 443 139252..140580 120_GENE_11             |
| 11212     | 146            | CGL2_11212146 Sugar fermentation stimulation protein                     | 239 140562..141278 120_GENE_10             |
| 11212     | 147            | CGL2_11212147 Putative NAD-dependent epimerase/dehydratase family        | 308 141307..142230 120_GENE_9              |
| 11212     | 148            | CGL2_11212148 Conserved hypothetical protein                             | 349 142223..143269 120_GENE_8              |
| 11212     | 149            | CGL2_11212149 Nucleoside-diphosphate kinase (EC 2.7.4.6)                 | 138 143276..143689 120_GENE_7              |
| 11212     | 150            | CGL2_11212150 Protein of unknown function                                | 397 143746..144936 120_GENE_6              |
| 11212     | 151            | CGL2_11212151 Tyrosyl-tRNA synthetase (EC 6.1.1.1)                       | 403 145018..146226 120_GENE_5              |
| 11212     | 152            | CGL2_11212152 Secretion protein HlyD                                     | 374 146440..147561 120_GENE_4              |
| 11212     | 153            | CGL2_11212153 Heavy metal efflux pump, CzcA family                       | 1027 147561..150641 120_GENE_3             |
| 11212     | 154            | CGL2_11212154 Putative glutamine amidotransferase class-I                | 235 150735..151439 120_GENE_2              |
| 11212     | 155            | CGL2_11212155 Transposase                                                | 446 151619..152956 120_GENE_1              |
| 11233rRNA | CGL2_11233R001 | 16S rRNA                                                                 | 219..1736                                  |
| 11233tRNA | CGL2_11233R001 | TRNA Ile GAT                                                             | 1862..1938                                 |
| 11233tRNA | CGL2_11233R002 | TRNA Ala TGC                                                             | 1944..2019                                 |

| 11233rRNA |    | CGL2_11233R002 | 23S rRNA                                                | 2347..4992 |                          |            |
|-----------|----|----------------|---------------------------------------------------------|------------|--------------------------|------------|
| 11233rRNA |    | CGL2_11233R003 | 5S rRNA                                                 | 5220..5283 |                          |            |
| 11233     | 1  | CGL2_11233001  | Hypothetical protein                                    | 49         | 5616..5762               |            |
| 11233     | 3  | CGL2_11233003  | NADH dehydrogenase, subunit F (EC 1.6.99.5)             | 1048       | 5797..8940               | 67_GENE_27 |
| 11233     | 4  | CGL2_11233004  | Putative endonuclease III                               | 210        | complement(8905..9534)   | 67_GENE_26 |
| 11233     | 5  | CGL2_11233005  | Putative transcriptional regulators, TraR/DksA family   | 136        | 9653..10060              | 67_GENE_25 |
| 11233     | 6  | CGL2_11233006  | Prolipoprotein diacylglyceryl transferase               | 272        | 10091..10906             | 67_GENE_24 |
| 11233     | 7  | CGL2_11233007  | Putative methyl-accepting chemotaxis sensory transducer | 484        | 10919..12370             | 67_GENE_23 |
| 11233     | 8  | CGL2_11233008  | Transcriptional regulator, BadM/Rrf2 family             | 141        | 12409..12831             | 67_GENE_22 |
| 11233     | 9  | CGL2_11233009  | Hypothetical protein                                    | 109        | complement(12830..13156) | 67_GENE_21 |
| 11233     | 10 | CGL2_11233010  | Conserved hypothetical protein                          | 90         | 13304..13573             | 67_GENE_20 |
| 11233     | 11 | CGL2_11233011  | Conserved protein of unknown function                   | 380        | complement(13576..14715) | 67_GENE_19 |
| 11233     | 12 | CGL2_11233012  | Putative permease                                       | 852        | complement(14711..17266) | 67_GENE_18 |
| 11233     | 13 | CGL2_11233013  | ABC transporter, ATP-binding protein (3.6.3.25)         | 241        | complement(17273..17995) | 67_GENE_17 |
| 11233     | 14 | CGL2_11233014  | 3-hydroxyisobutyrate dehydrogenase (EC 1.1.1.31)        | 292        | complement(17995..18870) | 67_GENE_16 |
| 11233     | 15 | CGL2_11233015  | Hypothetical protein                                    | 87         | 19172..19432             | 67_GENE_14 |
| 11233     | 16 | CGL2_11233016  | Conserved hypothetical protein                          | 97         | 19435..19725             | 67_GENE_13 |
| 11233     | 17 | CGL2_11233017  | Conserved hypothetical protein                          | 834        | 19721..22222             | 67_GENE_12 |
| 11233     | 18 | CGL2_11233018  | Hypothetical protein                                    | 204        | 22222..22833             | 67_GENE_11 |
| 11233     | 19 | CGL2_11233019  | Hypothetical protein                                    | 410        | 22845..24074             | 67_GENE_10 |
| 11233     | 20 | CGL2_11233020  | Hypothetical protein                                    | 229        | 24074..24760             | 67_GENE_9  |
| 11233     | 21 | CGL2_11233021  | DNA-dependent RNA polymerase                            | 385        | 24760..25914             | 67_GENE_8  |
| 11233     | 22 | CGL2_11233022  | Hypothetical protein                                    | 316        | 25919..26866             | 67_GENE_7  |
| 11233     | 23 | CGL2_11233023  | Putative MoxR-like ATPases                              | 282        | 26866..27711             | 67_GENE_6  |
| 11233     | 24 | CGL2_11233024  | Hypothetical protein                                    | 151        | complement(27892..28344) | 67_GENE_5  |
| 11233     | 25 | CGL2_11233025  | Putative oxygen-independent coproporphyrinogen III      | 389        | 28602..29768             | 67_GENE_4  |
| 11233     | 26 | CGL2_11233026  | Putative phage integrase family protein                 | 314        | complement(29784..30725) | 67_GENE_3  |
| 11233     | 27 | CGL2_11233027  | Hypothetical protein                                    | 390        | complement(30742..31911) | 67_GENE_2  |
| 11233     | 28 | CGL2_11233028  | Protein of unknown function                             | 455        | complement(31935..33299) | 62_GENE_28 |
| 11233     | 29 | CGL2_11233029  | Ferredoxin-nitrite reductase (EC 1.7.7.1)               | 547        | 33572..35212             | 62_GENE_27 |
| 11233     | 30 | CGL2_11233030  | Hypothetical protein                                    | 63         | complement(35224..35412) | 62_GENE_26 |
| 11233     | 31 | CGL2_11233031  | Conserved protein of unknown function                   | 282        | complement(35489..36334) | 62_GENE_25 |
| 11233     | 32 | CGL2_11233032  | Glycogen synthase (EC 2.4.1.21)                         | 493        | 36597..38075             | 62_GENE_24 |
| 11233     | 33 | CGL2_11233033  | transposase                                             | 133        | complement(38375..38773) | 62_GENE_23 |
| 11233     | 34 | CGL2_11233034  | Hypothetical protein                                    | 45         | complement(39064..39198) | 62_GENE_22 |
| 11233     | 35 | CGL2_11233035  | Putative transcriptional regulator, Crp/Fnr family      | 237        | complement(39216..39926) | 62_GENE_21 |
| 11233     | 36 | CGL2_11233036  | Putative peptidoglycan-binding lytic transglycosylase   | 473        | 40318..41736             | 62_GENE_20 |
| 11233     | 37 | CGL2_11233037  | Protein of unknown function                             | 264        | complement(41888..42679) | 62_GENE_19 |
| 11233     | 38 | CGL2_11233038  | Probable ferredoxin                                     | 86         | complement(42687..42944) | 62_GENE_18 |
| 11233     | 39 | CGL2_11233039  | NADH dehydrogenase (Quinone) (EC 1.6.99.5)              | 453        | complement(43053..44411) | 62_GENE_17 |
| 11233     | 40 | CGL2_11233040  | Phosphoribosylaminoimidazole carboxylase, catalytic     | 175        | 44665..45189             | 62_GENE_16 |

|           |    |                |                                                    |     |                          |            |
|-----------|----|----------------|----------------------------------------------------|-----|--------------------------|------------|
| 11233     | 41 | CGL2_11233041  | Phosphoribosylaminoimidazole carboxylase, ATPase : | 382 | 45189..46334             | 62_GENE_15 |
| 11233     | 42 | CGL2_11233042  | Conserved protein of unknown function              | 221 | complement(46352..47014) | 62_GENE_14 |
| 11233     | 43 | CGL2_11233043  | Protein of unknown function                        | 136 | complement(47165..47572) | 62_GENE_13 |
| 11233     | 44 | CGL2_11233044  | Putative adenylate/guanylate cyclase               | 454 | complement(48132..49493) | 62_GENE_12 |
| 11233     | 45 | CGL2_11233045  | Hypothetical protein                               | 483 | 49618..51066             | 62_GENE_11 |
| 11233     | 46 | CGL2_11233046  | Conserved protein of unknown function              | 374 | 51339..52460             | 62_GENE_10 |
| 11233     | 47 | CGL2_11233047  | Conserved hypothetical protein                     | 338 | 52613..53626             | 62_GENE_9  |
| 11233     | 48 | CGL2_11233048  | Conserved hypothetical protein                     | 132 | 53633..54028             | 62_GENE_8  |
| 11233     | 49 | CGL2_11233049  | Protein of unknown function                        | 213 | 54121..54759             | 62_GENE_7  |
| 11233     | 50 | CGL2_11233050  | oxidoreductase/K <sup>+</sup> -channel protein?    | 58  | 54944..55117             | 62_GENE_6  |
| 11233     | 51 | CGL2_11233051  | Protein of unknown function                        | 313 | complement(55300..56238) | 62_GENE_5  |
| 11233     | 52 | CGL2_11233052  | Putative ABC transporter                           | 304 | complement(56238..57149) | 62_GENE_4  |
| 11233     | 53 | CGL2_11233053  | Putative ABC transporter                           | 257 | complement(57188..57958) | 62_GENE_3  |
| 11233     | 54 | CGL2_11233054  | Probable ABC transporter, permease protein         | 261 | complement(57981..58763) | 62_GENE_2  |
| 11233     | 55 | CGL2_11233055  | Protein of unknown function                        | 243 | complement(58813..59541) | 62_GENE_1  |
| 11233     | 57 | CGL2_11233057  | Cold shock proteins                                | 68  | complement(60195..60398) | 140_GENE_1 |
| 11233     | 58 | CGL2_11233058  | Hypothetical protein                               | 205 | 60718..61332             | 140_GENE_2 |
| 11233     | 59 | CGL2_11233059  | Probable general secretion pathway protein I       | 127 | 61332..61712             | 140_GENE_3 |
| 11233     | 60 | CGL2_11233060  | Probable general secretion pathway protein J       | 235 | 61712..62416             | 140_GENE_4 |
| 11233     | 61 | CGL2_11233061  | DnaB helicase                                      | 463 | complement(62454..63842) | 140_GENE_5 |
| 11233     | 62 | CGL2_11233062  | Histidyl-tRNA lygase (EC 6.1.1.21)                 | 437 | complement(63849..65159) | 140_GENE_6 |
| 11233     | 63 | CGL2_11233063  | D-3-phosphoglycerate dehydrogenase (EC 1.1.1.95)   | 535 | complement(65159..66763) | 140_GENE_7 |
| 11233     | 64 | CGL2_11233064  | Serine--glyoxylate transaminase (EC 2.6.1.45)      | 381 | complement(66785..67927) | 140_GENE_8 |
| 11233     | 65 | CGL2_11233065  | Putative oligopeptide ABC transporter              | 533 | complement(68134..69732) | 140_GENE_9 |
| 11233rRNA |    | CGL2_11233R004 | 5S rRNA                                            |     | complement(69908..69971) |            |
| 11233rRNA |    | CGL2_11233R005 | 23S rRNA                                           |     | complement(70199..72844) |            |
| 11233tRNA |    | CGL2_11233R003 | TRNA Ala TGC                                       |     | complement(73172..73247) |            |
| 11233tRNA |    | CGL2_11233R004 | TRNA Ile GAT                                       |     | complement(73253..73329) |            |
| 11277     | 2  | CGL2_11277002  | Protein of unknown function                        | 40  | complement(239..358)     | 42_GENE_2  |
| 11277     | 3  | CGL2_11277003  | Protein of unknown function (probable hemolysin?)  | 455 | 562..1926                | 42_GENE_3  |
| 11277     | 4  | CGL2_11277004  | Protein of unknown function                        | 189 | 1957..2523               | 42_GENE_4  |
| 11277     | 5  | CGL2_11277005  | Protein of unknown function                        | 355 | 2548..3612               | 42_GENE_5  |
| 11277     | 6  | CGL2_11277006  | Transcriptional regulator, BadM/Rrf2 family        | 156 | 3698..4165               | 42_GENE_6  |
| 11277     | 7  | CGL2_11277007  | Cysteine desulfurase (EC 2.8.1.7)                  | 404 | 4128..5339               | 42_GENE_7  |
| 11277     | 8  | CGL2_11277008  | FeS cluster assembly scaffold IscU                 | 137 | 5380..5790               | 42_GENE_8  |
| 11277     | 9  | CGL2_11277009  | Iron-sulfur cluster assembly protein               | 109 | 5805..6131               | 42_GENE_9  |
| 11277     | 10 | CGL2_11277010  | Putative co-chaperone HscB                         | 225 | 6228..6902               | 42_GENE_10 |
| 11277     | 11 | CGL2_11277011  | Chaperone protein HscA                             | 603 | 6926..8734               | 42_GENE_11 |
| 11277     | 12 | CGL2_11277012  | Putative ferredoxin                                | 103 | 8754..9062               | 42_GENE_13 |
| 11277     | 13 | CGL2_11277013  | Protein of unknown function                        | 67  | 9098..9298               | 42_GENE_14 |

|           |    |                |                                                      |     |                          |             |
|-----------|----|----------------|------------------------------------------------------|-----|--------------------------|-------------|
| 11277     | 14 | CGL2_11277014  | Conserved hypothetical protein                       | 155 | 9298..9762               | 42_GENE_15  |
| 11277     | 15 | CGL2_11277015  | Putative ATP binding protein, Mrp like               | 358 | 9855..10928              | 42_GENE_16  |
| 11277     | 16 | CGL2_11277016  | Protein of unknown function                          | 85  | 10928..11182             | 42_GENE_17  |
| 11277     | 17 | CGL2_11277017  | Pseudouridylate synthase (4.2.1.70)                  | 268 | 11243..12046             | 42_GENE_18  |
| 11277     | 18 | CGL2_11277018  | Protein of unknown function                          | 103 | complement(12064..12372) | 42_GENE_19  |
| 11277     | 19 | CGL2_11277019  | Glycerol 3-phosphate dehydrogenase (NADP) (1.1.1.    | 353 | complement(12441..13499) | 42_GENE_20  |
| 11277     | 20 | CGL2_11277020  | Probable phosphoribosyltransferase                   | 223 | 13734..14402             | 42_GENE_21  |
| 11277     | 21 | CGL2_11277021  | Protein of unknown function                          | 403 | 14518..15726             | 42_GENE_22  |
| 11277     | 22 | CGL2_11277022  | Putative diguanylate cyclase/phosphodiesterase with  | 884 | complement(15720..18371) | 42_GENE_23  |
| 11277     | 23 | CGL2_11277023  | Putative phosphatidylethanolamine binding protein    | 188 | complement(18424..18987) | 42_GENE_24  |
| 11277     | 24 | CGL2_11277024  | Seryl-tRNA synthetase (6.1.1.11)                     | 442 | 19309..20634             | 42_GENE_25  |
| 11277     | 25 | CGL2_11277025  | Protein of unknown function                          | 123 | 20634..21002             | 42_GENE_26  |
| 11277     | 26 | CGL2_11277026  | Protein of unknown function                          | 241 | 20989..21711             | 42_GENE_27  |
| 11277     | 27 | CGL2_11277027  | Hypothetical protein                                 | 84  | 21749..22000             | 42_GENE_27a |
| 11277     | 28 | CGL2_11277028  | Putative GTP binding protein                         | 518 | 22111..23664             | 42_GENE_29  |
| 11277     | 29 | CGL2_11277029  | Hypothetical protein                                 | 163 | 23669..24157             | 42_GENE_30  |
| 11277     | 30 | CGL2_11277030  | Hypothetical protein                                 | 333 | 24160..25158             | 42_GENE_31  |
| 11277     | 31 | CGL2_11277031  | Protein of unknown function                          | 140 | 25253..25672             | 42_GENE_32  |
| 11277     | 32 | CGL2_11277032  | Putative peptidase M16                               | 476 | 25738..27165             | 42_GENE_33  |
| 11277     | 33 | CGL2_11277033  | Putative peptidase M16                               | 481 | 27196..28638             | 42_GENE_34  |
| 11277     | 34 | CGL2_11277034  | Hypothetical protein                                 | 430 | complement(28705..29994) | 42_GENE_35  |
| 11277     | 35 | CGL2_11277035  | Putative Na <sup>+</sup> /H <sup>+</sup> antiporters | 406 | complement(30044..31261) | 42_GENE_36  |
| 11277     | 36 | CGL2_11277036  | Putative metabolite transport protein                | 429 | 31715..33001             | 42_GENE_37  |
| 11277     | 37 | CGL2_11277037  | Conserved hypothetical protein                       | 101 | complement(33490..33792) | 42_GENE_38  |
| 11277     | 38 | CGL2_11277038  | Hypothetical protein                                 | 102 | 34138..34443             | 42_GENE_39  |
| 11277     | 39 | CGL2_11277039  | Hypothetical protein                                 | 93  | 34446..34724             | 42_GENE_40  |
| 11277     | 40 | CGL2_11277040  | Hypothetical protein                                 | 261 | complement(34681..35463) | 42_GENE_41  |
| 11277     | 41 | CGL2_11277041  | Hypothetical protein                                 | 187 | complement(35623..36183) | 42_GENE_44  |
| 11277     | 42 | CGL2_11277042  | Hypothetical protein                                 | 111 | complement(36183..36515) | 42_GENE_45  |
| 11277     | 43 | CGL2_11277043  | Conserved hypothetical protein                       | 83  | complement(36515..36763) | 42_GENE_47  |
| 11277     | 44 | CGL2_11277044  | Conserved hypothetical protein                       | 588 | complement(36892..38655) | 21_GENE_2   |
| 11277     | 45 | CGL2_11277045  | Conserved hypothetical protein                       | 307 | complement(38648..39568) | 21_GENE_3   |
| 11277     | 46 | CGL2_11277046  | Hypothetical protein                                 | 270 | 39766..40575             | 21_GENE_5   |
| 11277     | 47 | CGL2_11277047  | Integrase                                            | 367 | 40580..41680             | 21_GENE_6   |
| 11277tRNA |    | CGL2_11277R001 | TRNA Arg ACG                                         |     | complement(41698..41774) |             |
| 11277     | 48 | CGL2_11277048  | Leucyl-tRNA synthetase (6.1.1.4)                     | 828 | 42055..44538             | 21_GENE_8   |
| 11277     | 49 | CGL2_11277049  | Protein of unknown function                          | 239 | 44538..45254             | 21_GENE_9   |
| 11277     | 50 | CGL2_11277050  | Probable DNA polymerase III, delta subunit           | 348 | 45254..46297             | 21_GENE_10  |
| 11277     | 51 | CGL2_11277051  | Ribosomal protein S20                                | 87  | complement(46287..46547) | 21_GENE_11  |
| 11277     | 52 | CGL2_11277052  | Putative virulence factor MVN like                   | 547 | 46631..48271             | 21_GENE_12  |
| 11277     | 53 | CGL2_11277053  | Probable HNH endonuclease                            | 186 | complement(48285..48842) | 21_GENE_13  |

|           |    |                |                                                          |     |                          |            |
|-----------|----|----------------|----------------------------------------------------------|-----|--------------------------|------------|
| 11277     | 54 | CGL2_11277054  | Protein of unknown function                              | 347 | complement(48906..49946) | 21_GENE_14 |
| 11277     | 55 | CGL2_11277055  | Protein of unknown function                              | 163 | 50116..50604             | 21_GENE_15 |
| 11277     | 56 | CGL2_11277056  | Protein of unknown function                              | 116 | 50686..51036             | 21_GENE_16 |
| 11277     | 57 | CGL2_11277057  | Probable ATPase, PP-loop superfamily implicat            | 307 | 51036..51956             | 21_GENE_17 |
| 11277     | 58 | CGL2_11277058  | Conserved protein of unknown function                    | 324 | 52008..52979             | 21_GENE_18 |
| 11277     | 59 | CGL2_11277059  | Probable metal-dependent phosphohydrolase                | 424 | complement(52982..54253) | 21_GENE_19 |
| 11277     | 60 | CGL2_11277060  | Protein of unknown funciton, but transposase (delete     | 105 | 54888..55202             | 21_GENE_20 |
| 11277tRNA |    | CGL2_11277R002 | TRNA His GTG                                             |     | complement(55579..55653) |            |
| 11277     | 62 | CGL2_11277062  | Anthranilate synthases component I (EC 4.1.3.27)         | 441 | 55759..57080             | 21_GENE_21 |
| 11277     | 64 | CGL2_11277064  | Putative branched chain amino acid aminotransferase      | 295 | 57072..57956             | 21_GENE_22 |
| 11277     | 65 | CGL2_11277065  | Rubrerythrin                                             | 139 | 58187..58603             | 21_GENE_23 |
| 11277     | 66 | CGL2_11277066  | Ribonucleotide reductase (EC 1.17.4.1)                   | 732 | complement(58849..61044) | 21_GENE_24 |
| 11277     | 67 | CGL2_11277067  | Protein of unknown function                              | 484 | complement(61262..62713) | 21_GENE_25 |
| 11277     | 68 | CGL2_11277068  | Protein of unknown function                              | 205 | complement(62854..63468) | 21_GENE_26 |
| 11277     | 69 | CGL2_11277069  | Putative acriflavin resistance protein                   | 386 | complement(63783..64940) | 21_GENE_27 |
| 11277     | 70 | CGL2_11277070  | Putative acriflavin resistance protein                   | 664 | complement(64959..66950) | 21_GENE_28 |
| 11277tRNA |    | CGL2_11277R003 | TRNA Arg TCG                                             |     | complement(67254..67330) |            |
| 11277     | 71 | CGL2_11277071  | Protein of unknown function                              | 152 | 67577..68032             | 21_GENE_31 |
| 11277tRNA |    | CGL2_11277R004 | TRNA Cys GCA                                             |     | 68110..68184             |            |
| 11277     | 72 | CGL2_11277072  | Putative major facilitator superfamily transporter       | 487 | complement(68293..69753) | 21_GENE_32 |
| 11277     | 73 | CGL2_11277073  | L-2,4-diaminobutyric acid acetyltransferase              | 187 | 70464..71024             | 21_GENE_34 |
| 11277     | 74 | CGL2_11277074  | Diaminobutyrate--pyruvate aminotransferase (EC 2.6.1.14) | 425 | 71048..72322             | 21_GENE_35 |
| 11277     | 75 | CGL2_11277075  | Ectoine synthase                                         | 131 | 72349..72741             | 21_GENE_36 |
| 11277     | 76 | CGL2_11277076  | Ectoine hydroxylase                                      | 305 | 72819..73733             | 21_GENE_37 |
| 11277     | 77 | CGL2_11277077  | Protein of unknown function                              | 147 | complement(73776..74216) | 21_GENE_38 |
| 11277     | 78 | CGL2_11277078  | Hypothetical protein                                     | 153 | complement(74253..74711) | 21_GENE_39 |
| 11277     | 79 | CGL2_11277079  | Hypothetical protein                                     | 67  | 74818..75018             | 21_GENE_40 |
| 11277     | 80 | CGL2_11277080  | Probable sodium/calcium exchanger membrane regic         | 303 | 75018..75926             | 21_GENE_41 |
| 11277     | 81 | CGL2_11277081  | Probable transporter protein                             | 406 | 75926..77143             | 21_GENE_42 |
| 11277     | 82 | CGL2_11277082  | Hypothetical protein                                     | 214 | complement(77134..77775) | 21_GENE_43 |
| 11277     | 83 | CGL2_11277083  | Putative proteasome component                            | 448 | complement(77823..79166) | 21_GENE_44 |
| 11277     | 84 | CGL2_11277084  | Probable 20S proteasome alpha-subunit                    | 229 | complement(79193..79879) | 21_GENE_45 |
| 11277     | 85 | CGL2_11277085  | Putative 20S proteasome beta-subunit                     | 279 | complement(79879..80715) | 21_GENE_46 |
| 11277     | 86 | CGL2_11277086  | Conserved protein of unknown function                    | 70  | complement(80734..80943) | 21_GENE_47 |
| 11277     | 87 | CGL2_11277087  | Putative proteasome component                            | 505 | complement(80969..82483) | 21_GENE_48 |
| 11277     | 88 | CGL2_11277088  | Vesicle-fusing ATPase (EC 3.6.4.6)                       | 579 | complement(82504..84240) | 21_GENE_49 |
| 11277     | 89 | CGL2_11277089  | Peroxioredoxin                                           | 158 | complement(84432..84905) | 21_GENE_51 |
| 11277     | 90 | CGL2_11277090  | Putative band 7 family protein                           | 286 | complement(84982..85839) | 21_GENE_52 |
| 11277     | 91 | CGL2_11277091  | Protein of unknown function                              | 202 | complement(85874..86479) | 21_GENE_53 |
| 11277     | 92 | CGL2_11277092  | Protein of unknown function                              | 93  | complement(86487..86765) | 21_GENE_54 |
| 11277     | 93 | CGL2_11277093  | Protein of unknown function                              | 115 | 87064..87408             | 21_GENE_56 |

|       |      |                |                                                       |      |                            |            |
|-------|------|----------------|-------------------------------------------------------|------|----------------------------|------------|
| 11277 | 94   | CGL2_11277094  | Alcohol dehydrogenase (EC 1.1.1.1)                    | 334  | complement(87473..88474)   | 21_GENE_57 |
| 11277 | 95   | CGL2_11277095  | Protein of unknown function                           | 72   | complement(88519..88734)   | 21_GENE_58 |
| 11277 | 96   | CGL2_11277096  | Putative acriflavin resistance protein                | 1087 | complement(88826..92086)   | 21_GENE_59 |
| 11277 | 97   | CGL2_11277097  | Efflux transporter, RND family, MFP subunit           | 349  | complement(92086..93132)   | 32_GENE_53 |
| 11277 | 98   | CGL2_11277098  | Putative outer membrane efflux protein                | 472  | complement(93193..94608)   | 32_GENE_52 |
| 11277 | 99   | CGL2_11277099  | Putative transcriptional regulator, ArsR family       | 112  | complement(94608..94943)   | 32_GENE_51 |
| 11277 | 100  | CGL2_11277100  | Hypothetical protein                                  | 89   | 95205..95471               | 32_GENE_50 |
| 11277 | 101  | CGL2_11277101  | Exinuclease ABC, B subunit (UvrB)                     | 701  | complement(95482..97584)   | 32_GENE_49 |
| 11277 | 102  | CGL2_11277102  | Conserved hypothetical protein                        | 117  | complement(97584..97934)   | 32_GENE_48 |
| 11277 | 103  | CGL2_11277103  | Protein of unknown function                           | 239  | 97991..98707               | 32_GENE_47 |
| 11277 | 104  | CGL2_11277104  | Aminopeptidase N (EC 3.4.11.2)                        | 863  | complement(98735..101323)  | 32_GENE_46 |
| 11277 | 105  | CGL2_11277105  | Putative thioredoxin                                  | 108  | complement(101372..101695) | 32_GENE_45 |
| 11277 | 106  | CGL2_11277106  | Conserved protein of unknown function                 | 253  | 101887..102645             | 32_GENE_44 |
| 11277 | 107  | CGL2_11277107  | Protein of unknown function                           | 234  | 102658..103359             | 32_GENE_43 |
| 11277 | 108  | CGL2_11277108  | Probable cytochrome b561 family                       | 253  | 103465..104223             | 32_GENE_42 |
| 11277 | 109  | CGL2_11277109  | Putative diguanylate phosphodiesterase                | 416  | complement(104254..105501) | 32_GENE_41 |
| 11277 | 110  | CGL2_11277110  | Copper translocating P-type ATPase (EC 3.6.3.4)       | 843  | 105624..108152             | 32_GENE_40 |
| 11277 | 111  | CGL2_11277111  | Ammonium transporter                                  | 435  | complement(108233..109537) | 32_GENE_39 |
| 11277 | 112  | CGL2_11277112  | Nitrogen regulatory protein P-II                      | 112  | complement(109608..109943) | 32_GENE_38 |
| 11277 | 113  | CGL2_11277113  | Ammonium transporter                                  | 490  | complement(110013..111482) | 32_GENE_37 |
| 11277 | 114  | CGL2_11277114  | Protein of unknown function                           | 514  | complement(111609..113150) | 32_GENE_36 |
| 11277 | 115  | CGL2_11277115  | Hypothetical protein                                  | 154  | 113548..114009             | 32_GENE_35 |
| 11277 | 116  | CGL2_11277116  | Cystathionine gamma-synthase (EC 2.5.1.48)            | 401  | complement(114028..115230) | 32_GENE_34 |
| 11277 | 117  | CGL2_11277117  | Protein of unknown function                           | 365  | 115366..116460             | 32_GENE_33 |
| 11277 | 118  | CGL2_11277118  | Putative oligopeptide ABC transporter                 | 303  | complement(116491..117399) | 32_GENE_32 |
| 11277 | 119  | CGL2_11277119  | Putative oligopeptide ABC transporter                 | 283  | complement(117399..118247) | 32_GENE_31 |
| 11277 | 120  | CGL2_11277120  | Hypothetical protein                                  | 90   | complement(118250..118519) | 32_GENE_29 |
| 11277 | 121  | CGL2_11277121  | Protein of unknown function                           | 126  | complement(118522..118899) | 32_GENE_28 |
| 11277 | 122  | CGL2_11277122  | Protein of unknown function                           | 116  | complement(118957..119304) | 32_GENE_27 |
| 11277 | 123  | CGL2_11277123  | Protein of unknown function                           | 208  | complement(119294..119917) | 32_GENE_26 |
| 11277 | 124  | CGL2_11277124  | Putative glycosyl hydrolase, BNR repeat               | 352  | complement(120032..121087) | 32_GENE_25 |
| 11277 | 125  | CGL2_11277125  | Hypothetical protein                                  | 42   | complement(121087..121212) |            |
| 11277 | 126  | CGL2_11277126  | Hypothetical protein                                  | 18   | complement(121209..121262) |            |
| 11277 | 126a | CGL2_11277126a | Transposase                                           | 446  | complement(121576..122913) |            |
| 11277 | 127  | CGL2_11277127  | Protein of unknown function                           | 223  | complement(123460..124128) | 32_GENE_24 |
| 11277 | 128  | CGL2_11277128  | Putative haloacid dehalogenase-like hydrolase         | 232  | complement(124353..125048) | 32_GENE_23 |
| 11277 | 129  | CGL2_11277129  | Probable hexapeptide transferase family protein       | 177  | 125210..125740             | 32_GENE_22 |
| 11277 | 130  | CGL2_11277130  | Putative periplasmic sensor signal transduction histi | 546  | 125800..127437             | 32_GENE_21 |
| 11277 | 131  | CGL2_11277131  | Putative response regulator receiver protein          | 148  | 127459..127902             | 32_GENE_20 |
| 11277 | 132  | CGL2_11277132  | Peptidase S1C, Do                                     | 500  | 127946..129445             | 32_GENE_19 |
| 11277 | 133  | CGL2_11277133  | Probable crossover junction endodeoxyribonuclease (   | 158  | 129486..129959             | 32_GENE_18 |

|           |     |                     |                                                       |                     |                            |             |
|-----------|-----|---------------------|-------------------------------------------------------|---------------------|----------------------------|-------------|
| 11277     | 134 | CGL2_11277134       | Probable holliday junction DNA helicase (RuvA)        | 208                 | 129959..130582             | 32_GENE_17  |
| 11277     | 135 | CGL2_11277135       | Holliday junction DNA helicase (RuvB)                 | 332                 | 130572..131567             | 32_GENE_16  |
| 11277     | 136 | CGL2_11277136       | Protein of unknown function                           | 241                 | complement(131580..132302) | 32_GENE_15  |
| 11277     | 137 | CGL2_11277137       | Protein of unknown function                           | 277                 | 132450..133280             | 32_GENE_14  |
| 11277     | 138 | CGL2_11277138       | Protein of unknown function                           | 308                 | 133280..134203             | 32_GENE_13  |
| 11277     | 139 | CGL2_11277139       | Conserved hypothetical protein                        | 51                  | complement(134216..134368) | 32_GENE_12  |
| 11277     | 140 | CGL2_11277140       | Conserved hypothetical protein                        | 100                 | complement(134323..134622) | 32_GENE_11  |
| 11277     | 141 | CGL2_11277141       | Probable prevent-host-death protein                   | 64                  | complement(134673..134864) | 32_GENE_10  |
| 11277     | 142 | CGL2_11277142       | Hypothetical protein                                  | 105                 | 135141..135455             | 32_GENE_9   |
| 11277     | 143 | CGL2_11277143       | Putative antibiotic biosynthesis monooxygenase        | 104                 | 136077..136388             | 32_GENE_8   |
| 11277     | 144 | CGL2_11277144       | Probable thiamine biosynthesis protein                | 328                 | 136388..137371             | 32_GENE_7   |
| 11277     | 145 | CGL2_11277145       | Probable radical SAM family protein                   | 311                 | 137362..138294             | 32_GENE_6   |
| 11277     | 146 | CGL2_11277146       | Conserved protein of unknown function                 | 109                 | complement(138672..138998) | 32_GENE_5   |
| 11277     | 147 | CGL2_11277147       | Probable oxidoreductase FAD/NAD(P)-binding proteir    | 229                 | complement(139091..139777) | 32_GENE_4   |
| 11277     | 148 | CGL2_11277148       | Putative major facilitator superfamily transporter    | 418                 | 140056..141309             | 32_GENE_1   |
| 11277     | 149 | CGL2_11277149       | Protein of unknown function                           | 244                 | complement(141338..142069) |             |
| 11277     | 150 | CGL2_11277150       | Protein of unknown function                           | 255                 | 142172..142936             | 630_GENE_3  |
| 11277     | 151 | CGL2_11277151       | Transposase                                           | 411                 | 143224..144456             | 630_GENE_4  |
| 11277     | 153 | CGL2_11277153       | Protein of unknown function (cyt 572, see full length | 576                 | complement(144648..146375) | 630_GENE_6  |
|           |     | Strain variant path | Strain variant path                                   | Strain variant path |                            |             |
| 11277     | 154 | CGL2_11277154       | Transposase                                           | 446                 | complement(147058..148395) | 815_GENE_1  |
| 11277tRNA |     | CGL2_11277R005      | TRNA Leu CAA                                          |                     | 148692..148778             |             |
| 11277     | 155 | CGL2_11277155       | Integrase                                             | 185                 | 149319..149873             | 815_GENE_2  |
| 11277     | 156 | CGL2_11277156       | Hypothetical protein                                  | 63                  | 150116..150304             | 815_GENE_3  |
| 11277     | 157 | CGL2_11277157       | Hypothetical protein                                  | 60                  | complement(150474..150653) | 815_GENE_4  |
| 11277     | 158 | CGL2_11277158       | Protein of unknown function                           | 1140                | complement(150680..154099) | 815_GENE_5  |
| 11277     | 159 | CGL2_11277159       | Hypothetical protein                                  | 63                  | complement(154104..154292) | 600_GENE_2  |
| 11277     | 160 | CGL2_11277160       | Hypothetical protein                                  | 36                  | complement(154300..154407) | 600_GENE_3  |
| 11277     | 161 | CGL2_11277161       | Hypothetical protein                                  | 150                 | complement(154407..154856) | 600_GENE_4  |
| 11277     | 162 | CGL2_11277162       | conjugation TrwB                                      | 456                 | complement(154980..156347) | 600_GENE_5  |
| 11277     | 163 | CGL2_11277163       | plasmid coupling TrwB                                 | 425                 | complement(156353..157627) | 185_GENE_1  |
| 11277     | 164 | CGL2_11277164       | Hypothetical protein                                  | 138                 | complement(157645..158058) | 185_GENE_2  |
| 11277     | 165 | CGL2_11277165       | Hypothetical protein                                  | 180                 | complement(158058..158597) | 185_GENE_3  |
| 11277     | 166 | CGL2_11277166       | Hypothetical protein                                  | 85                  | complement(158751..159005) | 185_GENE_4  |
| 11277     | 167 | CGL2_11277167       | Hypothetical protein                                  | 75                  | complement(159005..159229) | 185_GENE_5  |
| 11277     | 168 | CGL2_11277168       | Hypothetical protein                                  | 82                  | complement(159229..159474) | 185_GENE_6  |
| 11277     | 169 | CGL2_11277169       | Hypothetical protein                                  | 43                  | complement(159518..159646) | 185_GENE_7  |
| 11277     | 170 | CGL2_11277170       | Hypothetical protein                                  | 104                 | complement(159661..159972) | 185_GENE_8  |
| 11277     | 171 | CGL2_11277171       | Protein of unknown function                           | 45                  | 160002..160136             | 185_GENE_9  |
| 11277     | 172 | CGL2_11277172       | Hypothetical protein                                  | 43                  | 160097..160225             | 185_GENE_10 |
| 11277     | 173 | CGL2_11277173       | Hypothetical protein                                  | 63                  | 160422..160610             | 185_GENE_12 |

|       |      |                |                                           |     |                            |             |
|-------|------|----------------|-------------------------------------------|-----|----------------------------|-------------|
| 11277 | 174  | CGL2_11277174  | Protein of unknown function               | 155 | 160628..161092             | 185_GENE_13 |
| 11277 | 174a | CGL2_11277174a | Hypothetical protein                      | 113 | complement(161100..161438) |             |
| 11277 | 175  | CGL2_11277175  | Hypothetical protein                      | 302 | complement(161562..162467) | 185_GENE_14 |
| 11277 | 176  | CGL2_11277176  | biopolymer transport, ExbD                | 147 | complement(162562..163002) | 185_GENE_15 |
| 11277 | 177  | CGL2_11277177  | TonB                                      | 509 | complement(163575..165101) | 185_GENE_16 |
| 11277 | 178  | CGL2_11277178  | TolQ                                      | 236 | complement(165245..165952) | 185_GENE_18 |
| 11277 | 179  | CGL2_11277179  | Protein of unknown function               | 500 | complement(166046..167545) | 185_GENE_19 |
| 11277 | 180  | CGL2_11277180  | Hypothetical protein                      | 54  | complement(167638..167799) | 185_GENE_20 |
| 11277 | 181  | CGL2_11277181  | Hypothetical protein                      | 146 | complement(167795..168232) | 185_GENE_21 |
| 11277 | 182  | CGL2_11277182  | Conserved protein of unknown function     | 577 | complement(168204..169934) | 185_GENE_22 |
| 11277 | 183  | CGL2_11277183  | Probable transposase                      | 213 | complement(170344..170982) | 173_GENE_16 |
| 11277 | 184  | CGL2_11277184  | Transposase                               | 431 | complement(170975..172267) | 173_GENE_15 |
| 11277 | 185  | CGL2_11277185  | Protein of unknown function               | 620 | complement(172511..174370) | 173_GENE_14 |
| 11277 | 186  | CGL2_11277186  | Conserved hypothetical protein            | 161 | complement(174395..174877) | 173_GENE_13 |
| 11277 | 187  | CGL2_11277187  | Hypothetical protein                      | 82  | complement(174885..175130) | 173_GENE_12 |
| 11277 | 188  | CGL2_11277188  | IstB helper protein/transposase           | 259 | complement(175186..175962) | 173_GENE_11 |
| 11277 | 189  | CGL2_11277189  | transposase                               | 440 | complement(175965..177284) | 173_GENE_10 |
| 11277 | 189a | CGL2_11277189a | Hypothetical protein                      | 126 | complement(177336..177713) |             |
| 11277 | 190  | CGL2_11277190  | Conserved protein of unknown function     | 221 | complement(178159..178821) | 173_GENE_9  |
| 11277 | 191  | CGL2_11277191  | Hypothetical protein                      | 151 | complement(179031..179483) | 173_GENE_7  |
| 11277 | 191a | CGL2_11277191a | Hypothetical protein                      | 138 | complement(179587..180000) |             |
| 11277 | 192  | CGL2_11277192  | transposase                               | 102 | complement(180152..180457) | 173_GENE_5  |
| 11277 | 193  | CGL2_11277193  | transposase                               | 135 | complement(180442..180846) | 173_GENE_4  |
| 11277 | 194  | CGL2_11277194  | Hypothetical protein                      | 225 | complement(180864..181538) | 173_GENE_3  |
| 11277 | 195  | CGL2_11277195  | Hypothetical protein                      | 73  | complement(181573..181791) | 173_GENE_2  |
| 11277 | 196  | CGL2_11277196  | Putative replicative helicase             | 448 | complement(181769..183112) | 173_GENE_1  |
| 11277 | 196a | CGL2_11277196a | Hypothetical protein                      | 75  | complement(183112..183336) |             |
| 11277 | 197a | CGL2_11277197a | Hypothetical protein                      | 110 | complement(183336..183665) |             |
| 11277 | 197  | CGL2_11277197  | Hypothetical protein                      | 80  | complement(183777..184016) | 374_GENE_1  |
| 11277 | 198  | CGL2_11277198  | Protein of unknown function               | 231 | 184124..184816             | 374_GENE_2  |
| 11277 | 199  | CGL2_11277199  | Transposase                               | 146 | complement(185024..185461) | 374_GENE_3  |
| 11277 | 200  | CGL2_11277200  | Probable phage integrase, pseudo          | 123 | 185866..186234             | 374_GENE_4a |
| 11277 | 201  | CGL2_11277201  | Protein of unknown function               | 113 | complement(186368..186706) | 374_GENE_5  |
| 11277 | 202  | CGL2_11277202  | Protein of unknown function               | 217 | complement(186712..187362) | 374_GENE_6  |
| 11277 | 203  | CGL2_11277203  | Protein of unknown function               | 163 | complement(187774..188262) | 374_GENE_7  |
| 11277 | 204  | CGL2_11277204  | Protein of unknown function               | 371 | complement(188410..189522) | 374_GENE_8  |
| 11277 | 205  | CGL2_11277205  | Conserved hypothetical protein            | 326 | complement(189531..190508) | 374_GENE_9  |
| 11277 | 206  | CGL2_11277206  | Probable TPR-domain containing protein    | 176 | complement(190718..191245) | 374_GENE_10 |
| 11277 | 207  | CGL2_11277207  | Conserved protein of unknown function     | 95  | complement(191933..192217) | 4_GENE_100  |
| 11277 | 208  | CGL2_11277208  | Putative carbon-nitrogen hydrolase        | 273 | complement(192294..193112) | 4_GENE_99   |
| 11277 | 209  | CGL2_11277209  | Pantoate-beta-alanine ligase (EC 6.3.2.1) | 286 | 193191..194048             | 4_GENE_98   |

|       |     |               |                                                        |     |                            |            |
|-------|-----|---------------|--------------------------------------------------------|-----|----------------------------|------------|
| 11277 | 210 | CGL2_11277210 | Putative tetrapyrrole methylase family protein         | 282 | 194044..194889             | 4_GENE_97  |
| 11277 | 211 | CGL2_11277211 | Deoxyuridine-triphosphatase (EC 3.6.1.23)              | 157 | complement(194931..195401) | 4_GENE_96  |
| 11277 | 212 | CGL2_11277212 | Protein of unknown function                            | 156 | complement(195401..195868) | 4_GENE_95  |
| 11277 | 213 | CGL2_11277213 | Acetylglutamate kinase (EC 2.7.2.8)                    | 290 | complement(195858..196727) | 4_GENE_94  |
| 11277 | 214 | CGL2_11277214 | Heat shock protein HslU                                | 444 | complement(196784..198115) | 4_GENE_93  |
| 11277 | 215 | CGL2_11277215 | ATP-dependent protease HslVU (ClpYQ), peptidase s      | 180 | complement(198115..198654) | 4_GENE_92  |
| 11277 | 216 | CGL2_11277216 | Putative phage integrase family protein                | 321 | complement(198695..199657) | 4_GENE_91  |
| 11277 | 218 | CGL2_11277218 | Putative glucose-inhibited division protein A          | 427 | complement(199650..200930) | 4_GENE_90  |
| 11277 | 219 | CGL2_11277219 | DNA topoisomerase (EC 5.99.1.2)                        | 850 | complement(201028..203577) | 4_GENE_89  |
| 11277 | 220 | CGL2_11277220 | DNA processing protein DprA                            | 306 | complement(203549..204466) | 4_GENE_88  |
| 11277 | 221 | CGL2_11277221 | Protein of unknown function                            | 90  | 204560..204829             | 4_GENE_87  |
| 11277 | 222 | CGL2_11277222 | Putative ABC transporter ATP-binding protein           | 160 | complement(204832..205311) | 4_GENE_86  |
| 11277 | 223 | CGL2_11277223 | Sulfate-transporting ATPase (EC 3.6.3.25)              | 252 | complement(205379..206134) | 4_GENE_85  |
| 11277 | 224 | CGL2_11277224 | Putative transmembrane transporter                     | 577 | complement(206130..207860) | 4_GENE_84  |
| 11277 | 225 | CGL2_11277225 | Protein of unknown function                            | 137 | 207968..208378             | 4_GENE_83  |
| 11277 | 226 | CGL2_11277226 | Protein of unknown function                            | 107 | 208414..208734             | 4_GENE_82  |
| 11277 | 227 | CGL2_11277227 | Protein of unknown function                            | 175 | complement(208761..209285) | 4_GENE_81  |
| 11277 | 228 | CGL2_11277228 | Hypothetical protein                                   | 362 | complement(209466..210551) | 4_GENE_80  |
| 11277 | 229 | CGL2_11277229 | Putative A/G-specific DNA glycosylase                  | 355 | complement(210551..211615) | 4_GENE_79  |
| 11277 | 230 | CGL2_11277230 | Hypothetical protein                                   | 245 | complement(211605..212339) | 4_GENE_78  |
| 11277 | 231 | CGL2_11277231 | Putative 2-amino-4-hydroxy-6-hydroxymethyldihydr       | 175 | complement(212384..212908) | 4_GENE_77  |
| 11277 | 232 | CGL2_11277232 | Aspartate aminotransferase (EC 2.6.1.1)                | 394 | complement(212911..214092) | 4_GENE_76  |
| 11277 | 233 | CGL2_11277233 | Hypothetical protein                                   | 237 | complement(214273..214983) | 4_GENE_75  |
| 11277 | 234 | CGL2_11277234 | Hypothetical protein                                   | 358 | complement(215023..216096) | 4_GENE_74  |
| 11277 | 235 | CGL2_11277235 | Hypothetical protein                                   | 149 | complement(216216..216662) | 4_GENE_73  |
| 11277 | 236 | CGL2_11277236 | Hypothetical protein                                   | 152 | complement(216662..217117) | 4_GENE_72  |
| 11277 | 237 | CGL2_11277237 | Hypothetical protein                                   | 165 | complement(217193..217687) | 4_GENE_70a |
| 11277 | 238 | CGL2_11277238 | 3-oxoacyl-[acyl-carrier-protein] reductase (1.1.1.100) | 235 | 217903..218607             | 4_GENE_70  |
| 11277 | 239 | CGL2_11277239 | Probable flagellar biosynthesis protein                | 100 | complement(218585..218884) | 4_GENE_69  |
| 11277 | 240 | CGL2_11277240 | Hypothetical protein                                   | 271 | complement(218884..219696) | 4_GENE_68  |
| 11277 | 241 | CGL2_11277241 | Protein of unknown function                            | 186 | complement(219715..220272) | 4_GENE_67  |
| 11277 | 242 | CGL2_11277242 | Hypothetical protein                                   | 96  | complement(220305..220592) | 4_GENE_66  |
| 11277 | 243 | CGL2_11277243 | Putative flagellar motor protein (OmpA/MotB)           | 261 | complement(220616..221398) | 4_GENE_65  |
| 11277 | 244 | CGL2_11277244 | Putative flagellar motor component (MotA)              | 260 | complement(221410..222189) | 4_GENE_64  |
| 11277 | 245 | CGL2_11277245 | Putative chemotaxis protein (CheW)                     | 171 | complement(222221..222733) | 4_GENE_63  |
| 11277 | 246 | CGL2_11277246 | Putative methyl-accepting chemotaxis sensory trans     | 557 | complement(222768..224438) | 4_GENE_62  |
| 11277 | 247 | CGL2_11277247 | Protein-glutamate methylesterase (CheB) (EC 3.1.1.1)   | 344 | complement(224494..225525) | 4_GENE_61  |
| 11277 | 248 | CGL2_11277248 | Putative signal transduction histidine kinase (CheA)   | 646 | complement(225538..227475) | 4_GENE_60  |
| 11277 | 249 | CGL2_11277249 | Putative response regulator receiver protein (CheY)    | 126 | complement(227520..227897) | 4_GENE_59  |
| 11277 | 250 | CGL2_11277250 | Protein-glutamate O-methyltransferase (CheR) (EC 2     | 264 | complement(228021..228812) | 4_GENE_58  |
| 11277 | 251 | CGL2_11277251 | Putative RNA polymerase sigma 28 subunit               | 251 | complement(228855..229607) | 4_GENE_57  |

|       |     |               |                                                        |     |                            |           |
|-------|-----|---------------|--------------------------------------------------------|-----|----------------------------|-----------|
| 11277 | 252 | CGL2_11277252 | Protein of unknown function                            | 292 | complement(229668..230543) | 4_GENE_56 |
| 11277 | 253 | CGL2_11277253 | flagellar biosynthesis protein FliH                    | 393 | complement(230547..231725) | 4_GENE_55 |
| 11277 | 254 | CGL2_11277254 | possible flagellar biosynthetic protein FliA           | 702 | complement(231732..233837) | 4_GENE_54 |
| 11277 | 255 | CGL2_11277255 | flagellar biosynthesis protein, FliB                   | 362 | complement(233821..234906) | 4_GENE_53 |
| 11277 | 256 | CGL2_11277256 | flagellar biosynthesis protein, FliR                   | 262 | complement(234899..235684) | 4_GENE_52 |
| 11277 | 257 | CGL2_11277257 | Chemotaxis/flagella (novel lepto genera)               | 112 | complement(235684..236019) | 4_GENE_51 |
| 11277 | 258 | CGL2_11277258 | Flagellar biosynthesis protein FliP                    | 265 | complement(236083..236877) | 4_GENE_50 |
| 11277 | 259 | CGL2_11277259 | Protein of unknown function                            | 173 | complement(236868..237386) | 4_GENE_49 |
| 11277 | 260 | CGL2_11277260 | flagellar motor switch protein FliN                    | 125 | complement(237419..237793) | 4_GENE_48 |
| 11277 | 261 | CGL2_11277261 | Putative flagellar basal body-associated protein FliI  | 168 | complement(237833..238336) | 4_GENE_47 |
| 11277 | 262 | CGL2_11277262 | Probable flagellar hook protein FlgE                   | 457 | complement(238500..239870) | 4_GENE_46 |
| 11277 | 263 | CGL2_11277263 | Probable flagellar hook capping protein FlgD           | 276 | complement(239875..240702) | 4_GENE_45 |
| 11277 | 264 | CGL2_11277264 | Conserved protein of unknown function                  | 494 | complement(240733..242214) | 4_GENE_44 |
| 11277 | 265 | CGL2_11277265 | Protein of unknown function                            | 169 | complement(242242..242748) | 4_GENE_43 |
| 11277 | 266 | CGL2_11277266 | Protein of unknown function                            | 147 | complement(242748..243188) | 4_GENE_42 |
| 11277 | 267 | CGL2_11277267 | Flagellum-specific ATP synthase FliI (EC 3.6.3.14)     | 462 | complement(243191..244576) | 4_GENE_41 |
| 11277 | 268 | CGL2_11277268 | Protein of unknown function                            | 219 | complement(244576..245232) | 4_GENE_40 |
| 11277 | 269 | CGL2_11277269 | Flagellar motor switch protein FliG                    | 334 | complement(245263..246264) | 4_GENE_39 |
| 11277 | 270 | CGL2_11277270 | Flagellar M-ring protein FliF                          | 531 | complement(246292..247884) | 4_GENE_38 |
| 11277 | 271 | CGL2_11277271 | Flagellar hook-basal body complex protein FliE         | 109 | complement(247936..248262) | 4_GENE_37 |
| 11277 | 272 | CGL2_11277272 | Flagellar basal-body rod protein FlgC                  | 145 | complement(248308..248742) | 4_GENE_36 |
| 11277 | 273 | CGL2_11277273 | Putative flagellar basal-body rod protein FlgB         | 144 | complement(248748..249179) | 4_GENE_35 |
| 11277 | 274 | CGL2_11277274 | Putative two component, sigma54 specific, transcript   | 489 | complement(249198..250664) | 4_GENE_34 |
| 11277 | 275 | CGL2_11277275 | Putative PAS/PAC sensor signal transduction histidine  | 406 | complement(250664..251881) | 4_GENE_33 |
| 11277 | 276 | CGL2_11277276 | Protein of unknown function                            | 719 | complement(251900..254056) | 4_GENE_32 |
| 11277 | 277 | CGL2_11277277 | Putative sigma54 specific transcriptional regulator, F | 344 | complement(254233..255264) | 4_GENE_31 |
| 11277 | 278 | CGL2_11277278 | Probable iron-sulfur cluster binding protein           | 342 | complement(255269..256294) | 4_GENE_30 |
| 11277 | 279 | CGL2_11277279 | Probable metal dependent phosphohydrolase              | 281 | complement(256294..257136) | 4_GENE_29 |
| 11277 | 280 | CGL2_11277280 | Probable metal dependent phosphohydrolase              | 280 | complement(257190..258029) | 4_GENE_28 |
| 11277 | 281 | CGL2_11277281 | Protein of unknown function                            | 110 | complement(258070..258399) | 4_GENE_27 |
| 11277 | 282 | CGL2_11277282 | Probable lipoate protein ligase                        | 209 | complement(258399..259025) | 4_GENE_26 |
| 11277 | 283 | CGL2_11277283 | Glycine dehydrogenase (Decarboxylating) subunit 2      | 496 | complement(259038..260525) | 4_GENE_25 |
| 11277 | 284 | CGL2_11277284 | Glycine dehydrogenase (Decarboxylating) subunit 1      | 453 | complement(260525..261883) | 4_GENE_24 |
| 11277 | 285 | CGL2_11277285 | Glycine cleavage system H protein                      | 134 | complement(261879..262280) | 4_GENE_23 |
| 11277 | 286 | CGL2_11277286 | Glycine cleavage system T protein (EC 2.1.2.10)        | 377 | complement(262394..263524) | 4_GENE_22 |
| 11277 | 287 | CGL2_11277287 | Protein of unknown function                            | 234 | 264038..264739             | 4_GENE_21 |
| 11277 | 288 | CGL2_11277288 | Putative methyl-accepting chemotaxis sensory trans     | 454 | complement(264821..266182) | 4_GENE_20 |
| 11277 | 289 | CGL2_11277289 | Putative methyl-accepting chemotaxis sensory trans     | 158 | complement(266088..266561) | 4_GENE_19 |
| 11277 | 290 | CGL2_11277290 | Protein of unknown function                            | 184 | complement(266571..267122) | 4_GENE_18 |
| 11277 | 291 | CGL2_11277291 | Probable ABC transporter, periplasmic component        | 339 | 267338..268354             | 4_GENE_17 |
| 11277 | 292 | CGL2_11277292 | Protein of unknown function                            | 467 | 268367..269767             | 4_GENE_16 |

|           |     |                |                                                         |      |                            |             |
|-----------|-----|----------------|---------------------------------------------------------|------|----------------------------|-------------|
| 11277     | 293 | CGL2_11277293  | Putative rhodanese-like domain protein                  | 114  | 269829..270170             | 4_GENE_15   |
| 11277     | 294 | CGL2_11277294  | Protein of unknown function                             | 101  | complement(270246..270548) | 4_GENE_14   |
| 11277     | 295 | CGL2_11277295  | Putative TRNA (1-methyladenosine) methyltransferase     | 276  | 270705..271532             | 4_GENE_13   |
| 11184     | 1   | CGL2_11184001  | Putative methyltransferase                              | 214  | complement(73..714)        | 4_GENE_12   |
| 11184     | 2   | CGL2_11184002  | NHL repeat domain protein                               | 494  | 847..2328                  | 4_GENE_11   |
| 11184     | 3   | CGL2_11184003  | Protein of unknown function                             | 436  | 2404..3711                 | 4_GENE_10   |
| 11184     | 4   | CGL2_11184004  | Hypothetical protein                                    | 67   | 3820..4020                 | 4_GENE_9    |
| 11184     | 5   | CGL2_11184005  | Diaminopimelate epimerase (EC 5.1.1.7)                  | 290  | complement(4043..4912)     | 4_GENE_8    |
| 11184     | 6   | CGL2_11184006  | Protein of unknown function                             | 284  | complement(4951..5802)     | 4_GENE_7    |
| 11184     | 7   | CGL2_11184007  | Probable short-chain dehydrogenase/reductase SDR        | 247  | complement(5798..6538)     | 4_GENE_6    |
| 11184     | 8   | CGL2_11184008  | Putative transcriptional regulators, TraR/DksA family   | 127  | complement(6538..6918)     | 4_GENE_5    |
| 11184     | 9   | CGL2_11184009  | Putative catalytic LigB subunit of aromatic ring-openi  | 291  | 7054..7926                 | 4_GENE_4    |
| 11184     | 10  | CGL2_11184010  | Heavy metal efflux pump (CzcA)                          | 1036 | complement(7845..10952)    | 4_GENE_3    |
| 11184     | 11  | CGL2_11184011  | Secretion protein (HlyD)                                | 380  | complement(10955..12094)   | 4_GENE_2    |
| 11184     | 12  | CGL2_11184012  | Probable outer membrane efflux protein                  | 458  | complement(12109..13482)   | 59_GENE_29  |
| 11184     | 13  | CGL2_11184013  | Protein of unknown function                             | 206  | complement(13836..14453)   | 59_GENE_28  |
| 11184     | 14  | CGL2_11184014  | Conserved protein of unknown function                   | 281  | complement(14453..15295)   | 59_GENE_27  |
| 11184     | 15  | CGL2_11184015  | Protein of unknown function                             | 402  | 15515..16720               | 59_GENE_26  |
| 11184     | 16  | CGL2_11184016  | Protein of unknown function                             | 82   | 16894..17139               | 59_GENE_24a |
| 11184     | 17  | CGL2_11184017  | Protein of unknown function                             | 100  | 17174..17473               | 59_GENE_24  |
| 11184     | 18  | CGL2_11184018  | Protein of unknown function                             | 122  | 17491..17856               | 59_GENE_23  |
| 11184     | 19  | CGL2_11184019  | Protein of unknown function                             | 83   | 17920..18168               | 59_GENE_22  |
| 11184tRNA |     | CGL2_11184R001 | TRNA Ser GGA                                            |      | 18280..18372               |             |
| 11184     | 20  | CGL2_11184020  | DNA polymerase III subunit gamma/tau (EC 2.7.7.7)       | 540  | 18561..20180               | 59_GENE_21  |
| 11184     | 21  | CGL2_11184021  | Protein of unknown function                             | 104  | 20180..20491               | 59_GENE_20  |
| 11184     | 22  | CGL2_11184022  | Recombination protein RecR                              | 214  | 20507..21148               | 59_GENE_19  |
| 11184     | 23  | CGL2_11184023  | Peptide chain release factor 3                          | 551  | 21206..22858               | 59_GENE_18  |
| 11184     | 24  | CGL2_11184024  | Putative mechanosensitive ion channel                   | 313  | complement(22805..23743)   | 59_GENE_17  |
| 11184tRNA |     | CGL2_11184R002 | TRNA Ser GCT                                            |      | complement(23816..23908)   |             |
| 11184tRNA |     | CGL2_11184R003 | TRNA Ser TGA                                            |      | complement(23939..24024)   |             |
| 11184     | 25  | CGL2_11184025  | Putative TPR-domain containing protein                  | 272  | complement(24581..25396)   | 59_GENE_16  |
| 11184     | 26  | CGL2_11184026  | Putative zinc-binding cytidine/deoxycytidylate deami    | 162  | 25430..25915               | 59_GENE_15  |
| 11184tRNA |     | CGL2_11184R004 | TRNA Ser CGA                                            |      | 25991..26080               |             |
| 11184     | 27  | CGL2_11184027  | Putative sigma-54 specific transcriptional regulator, I | 453  | 26104..27462               | 59_GENE_14  |
| 11184     | 28  | CGL2_11184028  | Protein of unknown function                             | 45   | 27707..27841               | 59_GENE_13  |
| 11184     | 29  | CGL2_11184029  | MazG family protein (nucleotide pyrophosphohydrola      | 301  | 27947..28849               | 59_GENE_12  |
| 11184     | 30  | CGL2_11184030  | Probable glycosyl transferase family protein            | 334  | 28849..29850               | 59_GENE_11  |
| 11184     | 31  | CGL2_11184031  | Probable metal-dependent phosphohydrolase               | 403  | 29865..31073               | 59_GENE_10  |
| 11184     | 32  | CGL2_11184032  | Protein of unknown function                             | 80   | complement(31072..31311)   | 59_GENE_9   |
| 11184     | 33  | CGL2_11184033  | Protein of unknown function                             | 136  | complement(31376..31783)   | 59_GENE_8   |
| 11184     | 34  | CGL2_11184034  | Hypothetical protein                                    | 72   | 31989..32204               | 59_GENE_7   |

|       |      |                |                                                         |              |                          |            |
|-------|------|----------------|---------------------------------------------------------|--------------|--------------------------|------------|
| 11184 | 35   | CGL2_11184035  | Probable acid phosphatase                               | 329          | complement(32217..33203) | 59_GENE_6  |
| 11184 | 36   | CGL2_11184036  | Protein of unknown function                             | 464          | complement(33203..34594) | 59_GENE_5  |
| 11184 | 37   | CGL2_11184037  | Dihydrolipoamide dehydrogenase (EC 1.8.1.4)             | 462          | complement(34642..36027) | 59_GENE_4  |
| 11184 | tRNA | CGL2_11184R005 | TRNA Met CAT                                            | 36112..36188 |                          |            |
| 11184 | 38   | CGL2_11184038  | transposase                                             | 479          | complement(37465..38901) | 333_GENE_1 |
| 11184 | 39   | CGL2_11184039  | Hypothetical protein                                    | 554          | complement(38909..40570) | 59_GENE_3  |
| 11184 | 40   | CGL2_11184040  | Hypothetical protein                                    | 213          | complement(40761..41399) | 333_GENE_4 |
| 11184 | 41   | CGL2_11184041  | Probable transcriptional regulator, LuxR family         | 358          | 42029..43102             | 333_GENE_5 |
| 11184 | 42   | CGL2_11184042  | Putative uracil-DNA glycosylase                         | 237          | complement(43132..43842) | 333_GENE_6 |
| 11184 | 43   | CGL2_11184043  | Hypothetical protein                                    | 66           | complement(43833..44030) | 333_GENE_7 |
| 11184 | 44   | CGL2_11184044  | Protein of unknown function                             | 404          | complement(44030..45241) | 333_GENE_8 |
| 11184 | 45   | CGL2_11184045  | Protein of unknown function (membrane?)                 | 124          | 45372..45743             | 333_GENE_9 |
| 11184 | 46   | CGL2_11184046  | Exoribonuclease II (EC 3.1.13.1)                        | 744          | complement(45739..47970) | 3_GENE_1   |
| 11184 | 47   | CGL2_11184047  | Protein of unknown function                             | 160          | 48741..49220             | 3_GENE_4   |
| 11184 | 48   | CGL2_11184048  | Putative outer membrane protein, OmpA/MotB family       | 179          | 49362..49898             | 3_GENE_5   |
| 11184 | 49   | CGL2_11184049  | Probable OmpA family protein                            | 232          | 50257..50952             | 3_GENE_6   |
| 11184 | 50   | CGL2_11184050  | Hypothetical protein                                    | 161          | complement(50891..51373) | 3_GENE_7   |
| 11184 | 51   | CGL2_11184051  | Thiamine-monophosphate kinase (EC 2.7.4.16)             | 335          | complement(51360..52364) | 3_GENE_8   |
| 11184 | 52   | CGL2_11184052  | ATP-dependent protease La (EC 3.4.21.53)                | 816          | complement(52357..54804) | 3_GENE_9   |
| 11184 | 53   | CGL2_11184053  | UTP-glucose-1-phosphate uridylyltransferase (GalU)      | 297          | complement(54811..55701) | 3_GENE_10  |
| 11184 | 54   | CGL2_11184054  | Dephospho-CoA kinase (EC 2.7.1.24)                      | 204          | complement(55723..56334) | 3_GENE_11  |
| 11184 | 55   | CGL2_11184055  | Hypothetical protein                                    | 159          | complement(56334..56810) | 3_GENE_12  |
| 11184 | 56   | CGL2_11184056  | Protein of unknown function                             | 229          | complement(56810..57496) | 3_GENE_13  |
| 11184 | 57   | CGL2_11184057  | DNA polymerase I (EC 2.7.7.7)                           | 872          | complement(57530..60145) | 3_GENE_14  |
| 11184 | 58   | CGL2_11184058  | Branched-chain amino acid aminotransferase (EC 2.6.1.1) | 310          | complement(60155..61084) | 3_GENE_15  |
| 11184 | 59   | CGL2_11184059  | Probable membrane protein                               | 234          | complement(61126..61827) | 3_GENE_16  |
| 11184 | 60   | CGL2_11184060  | Hypothetical protein                                    | 191          | complement(61920..62492) | 3_GENE_17  |
| 11184 | 61   | CGL2_11184061  | Hypothetical protein                                    | 333          | complement(62483..63481) | 3_GENE_18  |
| 11184 | 62   | CGL2_11184062  | Putative transcriptional regulator, LysR family         | 303          | complement(63481..64389) | 3_GENE_19  |
| 11184 | 63   | CGL2_11184063  | Probable ATP-dependent DNA helicase                     | 737          | complement(64411..66621) | 3_GENE_20  |
| 11184 | 64   | CGL2_11184064  | Conserved hypothetical protein                          | 240          | complement(66625..67344) | 3_GENE_21  |
| 11184 | 65   | CGL2_11184065  | Protein of unknown function                             | 468          | complement(67319..68722) | 3_GENE_22  |
| 11184 | 66   | CGL2_11184066  | Conserved protein of unknown function                   | 185          | complement(68725..69279) | 3_GENE_23  |
| 11184 | 67   | CGL2_11184067  | Nicotinate-nucleotide adenylyltransferase (EC 2.7.7.1)  | 230          | complement(69263..69952) | 3_GENE_25  |
| 11184 | 68   | CGL2_11184068  | Gamma-glutamyl phosphate reductase (EC 1.2.1.41)        | 421          | complement(69974..71236) | 3_GENE_26  |
| 11184 | 69   | CGL2_11184069  | Glutamate 5-kinase (EC 2.7.2.11)                        | 380          | complement(71246..72385) | 3_GENE_27  |
| 11184 | 70   | CGL2_11184070  | Putative GTP binding protein                            | 360          | complement(72385..73464) | 3_GENE_28  |
| 11184 | 71   | CGL2_11184071  | Ribosomal protein L27                                   | 92           | complement(73492..73767) | 3_GENE_29  |
| 11184 | 72   | CGL2_11184072  | Ribosomal protein L21                                   | 106          | complement(73849..74166) | 3_GENE_30  |
| 11184 | 73   | CGL2_11184073  | Putative ferric uptake regulator, Fur family            | 153          | 74477..74935             | 3_GENE_31  |
| 11184 | 74   | CGL2_11184074  | Probable glycosyl hydrolase, BNR repeat                 | 352          | complement(74979..76034) | 3_GENE_32  |

|           |     |                |                                                        |      |                          |           |
|-----------|-----|----------------|--------------------------------------------------------|------|--------------------------|-----------|
| 11184     | 75  | CGL2_11184075  | transposase                                            | 115  | complement(76434..76778) | 3_GENE_33 |
| 11181     | 1   | CGL2_11181001  | Protein of unknown function                            | 332  | complement(801..1796)    | 3_GENE_34 |
| 11181     | 2   | CGL2_11181002  | Probable 6-pyruvoyl tetrahydrobiopterin synthase far   | 128  | 2118..2501               | 3_GENE_36 |
| 11181     | 3   | CGL2_11181003  | Oligopeptide/dipeptide ABC transporter, ATP-binding    | 336  | 2501..3508               | 3_GENE_37 |
| 11181     | 4   | CGL2_11181004  | ABC phosphate transporter (EC 3.6.3.27)                | 347  | 3513..4553               | 3_GENE_38 |
| 11181     | 5   | CGL2_11181005  | Phenylalanyl-tRNA synthetase alpha chain (EC 6.1.1.    | 519  | 4581..6137               | 3_GENE_39 |
| 11181     | 6   | CGL2_11181006  | Phenylalanyl-tRNA synthetase beta chain                | 569  | 6174..7880               | 3_GENE_40 |
| 11181     | 7   | CGL2_11181007  | Ribosomal protein L20                                  | 118  | complement(7952..8305)   | 3_GENE_41 |
| 11181     | 8   | CGL2_11181008  | Ribosomal protein L35                                  | 65   | complement(8390..8584)   | 3_GENE_42 |
| 11181     | 9   | CGL2_11181009  | Translation initiation factor 3 (IF-3)                 | 175  | complement(8629..9153)   | 3_GENE_43 |
| 11181     | 10  | CGL2_11181010  | Threonyl-tRNA synthetase (EC 6.1.1.3)                  | 617  | complement(9229..11079)  | 3_GENE_44 |
| 11181     | 10a | CGL2_11181010a | Putative transpoase                                    | 446  | complement(11438..12775) |           |
| 11181     | 11  | CGL2_11181011  | Putative diguanylate cyclase/phosphodiesterase         | 1196 | complement(12923..16510) | 3_GENE_45 |
| 11181     | 12  | CGL2_11181012  | Phosphomethylpyrimidine kinase (EC 2.7.4.7)            | 283  | complement(16529..17377) | 3_GENE_46 |
| 11181     | 13  | CGL2_11181013  | Putative peptidase M23B family protein                 | 296  | complement(17383..18270) | 3_GENE_47 |
| 11181     | 14  | CGL2_11181014  | Thiamine monophosphate synthase (EC 2.5.1.3)           | 215  | complement(18270..18914) | 3_GENE_48 |
| 11181     | 15  | CGL2_11181015  | Thiazole biosynthesis protein (ThiG)                   | 274  | complement(18920..19741) | 3_GENE_49 |
| 11181     | 17  | CGL2_11181017  | Acetyl-CoA synthetase (EC 6.2.1.1)                     | 641  | 19983..21905             | 3_GENE_50 |
| 11181     | 18  | CGL2_11181018  | Putative glyoxalase (GloA)                             | 291  | 21932..22804             | 3_GENE_51 |
| 11181     | 19  | CGL2_11181019  | Hypothetical protein                                   | 270  | complement(22776..23585) | 3_GENE_52 |
| 11181     | 20  | CGL2_11181020  | Putative monogalactosyldiacylglycerol synthase         | 376  | 23777..24904             | 3_GENE_53 |
| 11181     | 21  | CGL2_11181021  | Putative metallophosphoesterase                        | 311  | 24904..25836             | 3_GENE_54 |
| 11181     | 22  | CGL2_11181022  | Probable major facilitator superfamily transporter     | 405  | complement(25751..26965) | 3_GENE_55 |
| 11181     | 23  | CGL2_11181023  | Carboxymethylenebutenolidase (EC 3.1.1.45)             | 259  | complement(27021..27797) | 3_GENE_56 |
| 11181     | 24  | CGL2_11181024  | Putative outer membrane protein                        | 496  | complement(28208..29695) | 3_GENE_57 |
| 11181     | 25  | CGL2_11181025  | Protein of unknown function                            | 165  | complement(29796..30290) | 3_GENE_58 |
| 11181     | 26  | CGL2_11181026  | Putative periplasmic sensor signal transduction histic | 474  | complement(30414..31835) | 3_GENE_59 |
| 11181     | 27  | CGL2_11181027  | Putative two component transcriptional regulator, wii  | 222  | complement(31850..32515) | 3_GENE_60 |
| 11181     | 28  | CGL2_11181028  | Protein of unknown function                            | 151  | complement(32571..33023) | 3_GENE_61 |
| 11181tRNA |     | CGL2_11181R001 | TRNA Pro TGG                                           |      | complement(33263..33339) |           |
| 11181     | 29  | CGL2_11181029  | Protein of unknown function                            | 318  | 33507..34460             | 3_GENE_62 |
| 11181     | 30  | CGL2_11181030  | Putative beta-lactamase family protein                 | 293  | 34468..35346             | 3_GENE_63 |
| 11181     | 31  | CGL2_11181031  | ATP synthase F1, epsilon subunit                       | 143  | complement(35424..35852) | 3_GENE_64 |
| 11181     | 32  | CGL2_11181032  | ATP synthase F1, beta subunit (EC 3.6.3.15)            | 463  | complement(35861..37249) | 3_GENE_65 |
| 11181     | 33  | CGL2_11181033  | ATP synthase F1, gamma subunit (EC 3.6.3.15)           | 291  | complement(37297..38169) | 3_GENE_66 |
| 11181     | 34  | CGL2_11181034  | ATP synthase F1, alpha subunit (EC 3.6.3.15)           | 512  | complement(38176..39711) | 3_GENE_67 |
| 11181     | 35  | CGL2_11181035  | Putative ATP synthase F1, delta subunit                | 189  | complement(39711..40277) | 3_GENE_68 |
| 11181     | 36  | CGL2_11181036  | ATP synthase F0, subunit B                             | 175  | complement(40277..40801) | 3_GENE_69 |
| 11181     | 37  | CGL2_11181037  | ATP synthase F0, subunit C                             | 76   | complement(40850..41077) | 3_GENE_70 |
| 11181     | 38  | CGL2_11181038  | ATP synthase F0, subunit A                             | 244  | complement(41111..41842) | 3_GENE_71 |
| 11181     | 39  | CGL2_11181039  | Hypothetical protein                                   | 89   | complement(41849..42115) | 3_GENE_72 |

|       |      |                |                                                        |      |                          |              |
|-------|------|----------------|--------------------------------------------------------|------|--------------------------|--------------|
| 11181 | 40   | CGL2_11181040  | Probable membrane protein                              | 164  | 42457..42948             | 3_GENE_73    |
| 11181 | 41   | CGL2_11181041  | Phosphoglycolate phosphatase (EC 3.1.3.18)             | 239  | complement(42869..43585) | 3_GENE_74    |
| 11181 | 42   | CGL2_11181042  | Putative oligopeptide ABC transporter, permease pro    | 340  | complement(43651..44670) | 3_GENE_75    |
| 11181 | 43   | CGL2_11181043  | Putative oligopeptide ABC transporter, permease pro    | 324  | complement(44670..45641) | 3_GENE_76    |
| 11181 | 44   | CGL2_11181044  | Transporter (Extracellular solute binding protein fam  | 534  | complement(45641..47242) | 3_GENE_77    |
| 11181 | 45   | CGL2_11181045  | preprotein translocase, SecG subunit                   | 101  | complement(47380..47682) | 3_GENE_78    |
| 11181 | 46   | CGL2_11181046  | Triosephosphate isomerase (EC 5.3.1.1)                 | 258  | complement(47737..48510) | 3_GENE_79    |
| 11181 | 47   | CGL2_11181047  | Phosphoglycerate kinase (EC 2.7.2.3)                   | 399  | complement(48527..49723) | 3_GENE_80    |
| 11181 | 48   | CGL2_11181048  | Glyceraldehyde-3-phosphate dehydrogenase (EC 1.2       | 342  | complement(49723..50748) | 3_GENE_81    |
| 11181 | 49   | CGL2_11181049  | Peptidoglycan glycosyltransferase (EC 2.4.1.129)       | 790  | complement(50867..53236) | 3_GENE_82    |
| 11181 | 50   | CGL2_11181050  | Hypothetical protein                                   | 70   | complement(53463..53672) | 3_GENE_84    |
| 11181 | 51   | CGL2_11181051  | Orotate phosphoribosyl transferase (EC 2.4.2.10)       | 212  | complement(53820..54455) | 3_GENE_85    |
| 11181 | 52   | CGL2_11181052  | Putative methyl-accepting chemotaxis sensory trans     | 368  | complement(54660..55763) | 3_GENE_86    |
| 11181 | tRNA | CGL2_11181R002 | TRNA Leu GAG                                           |      | complement(56130..56213) |              |
| 11181 | 53   | CGL2_11181053  | Siroheme synthase, N-terminal                          | 217  | complement(56502..57152) | 3_GENE_89    |
| 11181 | 54   | CGL2_11181054  | Probable DNA uptake lipoprotein                        | 243  | complement(57152..57880) | 3_GENE_90    |
| 11181 | 55   | CGL2_11181055  | 3-oxoacyl-[acyl-carrier-protein] synthase 3 (EC 2.3.1  | 329  | 57974..58960             | 3_GENE_91    |
| 11181 | 56   | CGL2_11181056  | Putative two component, sigma54 specific, transcript   | 457  | complement(58963..60333) | 3_GENE_92    |
| 11181 | 57   | CGL2_11181057  | Multi-sensor signal transduction histidine kinase      | 751  | complement(60337..62589) | 3_GENE_93    |
| 11181 | 58   | CGL2_11181058  | Protein of unknown function                            | 408  | complement(62648..63871) | 3_GENE_94    |
| 11181 | 59   | CGL2_11181059  | Protein of unknown function                            | 222  | complement(63878..64543) | 3_GENE_95    |
| 11181 | 60   | CGL2_11181060  | Probable multiple antibiotic resistance protein (MarC) | 201  | 64582..65184             | 3_GENE_96    |
| 11181 | 61   | CGL2_11181061  | Protein of unknown function                            | 144  | 65289..65720             | 3_GENE_97    |
| 11181 | 62   | CGL2_11181062  | Putative UbiE/COQ5 methyltransferase                   | 279  | complement(65732..66568) | 3_GENE_98    |
| 11181 | 63   | CGL2_11181063  | Putative queuosine biosynthesis protein                | 385  | complement(66568..67722) | 3_GENE_99    |
| 11181 | 64   | CGL2_11181064  | Putative diguanylate phosphodiesterase                 | 347  | 67758..68798             | 3_GENE_100   |
| 11181 | 65   | CGL2_11181065  | Protein of unknown function                            | 168  | 68937..69440             | 3_GENE_101   |
| 11181 | 66   | CGL2_11181066  | Probable lipoprotein                                   | 396  | 69456..70643             | 3_GENE_102   |
| 11181 | 67   | CGL2_11181067  | Putative sulfide-quinone reductase                     | 375  | complement(70746..71870) | 3_GENE_103   |
| 11181 | 68   | CGL2_11181068  | Carbonic anhydrase                                     | 193  | complement(71985..72563) | 147_GENE_15  |
| 11181 | 69   | CGL2_11181069  | Diguanylate cyclase                                    | 368  | 72947..74050             | 147_GENE_14  |
| 11181 | 70   | CGL2_11181070  | Protein of unknown function                            | 161  | 74106..74588             | 147_GENE_13  |
| 11181 | 71   | CGL2_11181071  | Probable helicase                                      | 62   | 74581..74766             | 147_GENE_11a |
| 11181 | 72   | CGL2_11181072  | Putative helicase                                      | 1055 | complement(74776..77940) | 147_GENE_11  |
| 11181 | 73   | CGL2_11181073  | Putative NUDIX hydrolase                               | 134  | complement(77930..78331) | 147_GENE_10  |
| 11181 | 74   | CGL2_11181074  | Putative metal-dependent phosphohydrolase              | 476  | 78515..79942             | 147_GENE_9   |
| 11181 | 75   | CGL2_11181075  | Patatin-like phospholipase                             | 330  | 79948..80937             | 147_GENE_8   |
| 11181 | 76   | CGL2_11181076  | Alcohol dehydrogenase (EC 1.1.1.1)                     | 341  | complement(80947..81969) | 147_GENE_7   |
| 11181 | 77   | CGL2_11181077  | Probable anti-ECFsigma factor (ChrR)                   | 223  | complement(81969..82637) | 147_GENE_6   |
| 11181 | 78   | CGL2_11181078  | Protein of unknown function                            | 268  | 82811..83614             | 147_GENE_5   |
| 11181 | 79   | CGL2_11181079  | Conserved hypothetical protein                         | 318  | 83614..84567             | 147_GENE_4   |

|                     |    |               |                                                      |      |                          |                     |
|---------------------|----|---------------|------------------------------------------------------|------|--------------------------|---------------------|
| 11181               | 80 | CGL2_11181080 | Protein of unknown function                          | 100  | 84741..85040             | 147_GENE_3          |
| 11181               | 81 | CGL2_11181081 | Probable transcriptional regulator                   | 97   | 85040..85330             | 147_GENE_2          |
| CGL2_11181CRISPR    |    |               |                                                      |      | 85518..89905             |                     |
| CGL2_11386CRISPR    |    |               |                                                      |      | 36056..37265             |                     |
| 11386               | 30 | CGL2_11386030 | CRISPR-associated protein, Cas2                      | 102  | 35660..35965             | 26_GENE_2           |
| 11386               | 29 | CGL2_11386029 | CRISPR-associated protein, Cas1                      | 306  | 34759..35676             | 26_GENE_3           |
| 11386               | 28 | CGL2_11386028 | CRISPR-associated protein, Cas3                      | 218  | 34110..34763             | 26_GENE_4           |
| 11386               | 27 | CGL2_11386027 | CRISPR-associated protein, Cas5                      | 227  | 33440..34120             | 26_GENE_5           |
| 11386               | 26 | CGL2_11386026 | CRISPR-associated protein, Cas4                      | 398  | 32239..33432             | 26_GENE_6           |
| 11386               | 25 | CGL2_11386025 | CRISPR-associated protein, Cas2                      | 171  | 31727..32239             | 26_GENE_7           |
| 11386               | 24 | CGL2_11386024 | CRISPR-associated protein, Cas1                      | 508  | 30204..31727             | 26_GENE_8           |
| 11386               | 23 | CGL2_11386023 | CRISPR-associated helicase Cas3                      | 880  | 27565..30204             | 26_GENE_9           |
| 11386               | 22 | CGL2_11386022 | Transposase                                          | 455  | 25968..27332             | 26_GENE_10          |
| 11386               | 21 | CGL2_11386021 | Probable transposase                                 | 143  | complement(25114..25542) | 26_GENE_12          |
| 11386               | 20 | CGL2_11386020 | Hypothetical protein                                 | 74   | complement(24765..24986) | 26_GENE_13          |
| 11386               | 19 | CGL2_11386019 | Hypothetical protein                                 | 43   | complement(24580..24708) | 26_GENE_14          |
| 11386               | 18 | CGL2_11386018 | DNA methyltransferase/helicase                       | 1067 | complement(20914..24114) | 26_GENE_15          |
| 11386               | 17 | CGL2_11386017 | Conserved protein of unknown function                | 209  | complement(20254..20880) | 26_GENE_16          |
| 11386               | 16 | CGL2_11386016 | Protein of unknown function                          | 229  | 19380..20066             | 26_GENE_17          |
| 11386               | 15 | CGL2_11386015 | Hypothetical protein                                 | 125  | 18864..19238             | 26_GENE_18          |
| 11386               | 14 | CGL2_11386014 | Conserved hypothetical protein                       | 703  | 16756..18864             | 26_GENE_19          |
| Strain variant path |    |               | Strain variant path                                  |      |                          | Strain variant path |
| 11386               | 13 | CGL2_11386013 | Conserved hypothetical protein                       | 300  | 15833..16732             | 26_GENE_20          |
| 11386               | 12 | CGL2_11386012 | phage DNA binding protein                            | 60   | 15654..15833             | 26_GENE_21          |
| 11386               | 11 | CGL2_11386011 | Hypothetical protein                                 | 309  | 14611..15537             | 26_GENE_22          |
| 11386               | 10 | CGL2_11386010 | integrase INT P4                                     | 403  | 13403..14611             | 26_GENE_23          |
| 11386               | 9  | CGL2_11386009 | SsrA-binding protein                                 | 163  | 12311..12799             | 26_GENE_24          |
| 11386               | 8  | CGL2_11386008 | Leucyl aminopeptidase (EC 3.4.11.1)                  | 532  | 10649..12244             | 183_GENE_9          |
| 11386               | 7  | CGL2_11386007 | ExsB protein (succinoglycan synthase?)               | 241  | 9812..10534              | 183_GENE_8          |
| 11386               | 6  | CGL2_11386006 | Putative radical activating enzyme                   | 212  | 9171..9806               | 183_GENE_7          |
| 11386               | 5  | CGL2_11386005 | Protein of unknown function                          | 231  | 8411..9103               | 183_GENE_6          |
| 11386               | 4  | CGL2_11386004 | DNA gyrase, A subunit                                | 816  | 5860..8307               | 183_GENE_5          |
| 11386               | 3  | CGL2_11386003 | DNA gyrase, B subunit (EC 5.99.1.3)                  | 818  | 3348..5801               | 183_GENE_4          |
| 11386               | 2  | CGL2_11386002 | DNA polymerase III, beta chain (EC 2.7.7.7)          | 387  | 1959..3119               | 183_GENE_3          |
| 11386               | 1  | CGL2_11386001 | Chromosomal replication initiator protein (DnaA) ORI | 465  | 543..1937                | 183_GENE_2          |
| Strain variant path |    |               | Strain variant path                                  |      |                          | Strain variant path |
| 11389               | 40 | CGL2_11389040 | Acetolactate synthase, large subunit (EC 2.2.1.6)    | 581  | complement(34161..35903) | 26_GENE_33          |
| 11389               | 39 | CGL2_11389039 | Acetolactate synthase, small subunit                 | 184  | complement(33592..34143) | 26_GENE_34          |
| 11389               | 38 | CGL2_11389038 | Acetohydroxy acid isomeroreductase (EC 1.1.1.86)     | 339  | complement(32507..33523) | 26_GENE_35          |
| 11389               | 37 | CGL2_11389037 | Phosphatidylserine decarboxylase (EC 4.1.1.65)       | 217  | complement(31841..32491) | 26_GENE_36          |
| 11389               | 36 | CGL2_11389036 | CDP-diacylglycerol-serine O-phosphatidyltransferase  | 278  | complement(31036..31869) | 26_GENE_37          |

|       |    |               |                                                    |      |                          |            |
|-------|----|---------------|----------------------------------------------------|------|--------------------------|------------|
| 11389 | 35 | CGL2_11389035 | 2-isopropylmalate synthase (EC 2.3.3.13) AA and py | 532  | complement(29395..30990) | 26_GENE_38 |
| 11389 | 34 | CGL2_11389034 | 3-isopropylmalate dehydrogenase (EC 1.1.1.85) AA I | 370  | complement(28228..29337) | 26_GENE_39 |
| 11389 | 33 | CGL2_11389033 | Aspartate-semialdehyde dehydrogenase (EC 1.2.1.1'  | 349  | complement(27182..28228) | 26_GENE_40 |
| 11389 | 32 | CGL2_11389032 | Quinolinate synthetase complex, subunit A          | 316  | complement(26215..27162) | 26_GENE_41 |
| 11389 | 31 | CGL2_11389031 | Conserved hypothetical protein                     | 79   | complement(25979..26215) | 26_GENE_42 |
| 11389 | 30 | CGL2_11389030 | Protein of unknown function                        | 170  | 25497..26006             | 26_GENE_43 |
| 11389 | 29 | CGL2_11389029 | Putative ferredoxin oxidoreductase                 | 193  | 24828..25406             | 26_GENE_44 |
| 11389 | 28 | CGL2_11389028 | Putative glyoxalase/bleomycin resistance protein   | 141  | complement(24161..24583) | 26_GENE_45 |
| 11389 | 27 | CGL2_11389027 | Protein of unknown function                        | 351  | 23091..24143             | 26_GENE_46 |
| 11389 | 26 | CGL2_11389026 | Conserved hypothetical protein                     | 375  | 21909..23033             | 26_GENE_47 |
| 11389 | 25 | CGL2_11389025 | Conserved hypothetical protein                     | 191  | 21350..21922             | 26_GENE_48 |
| 11389 | 24 | CGL2_11389024 | Conserved protein of unknown function              | 190  | 20605..21174             | 80_GENE_26 |
| 11389 | 23 | CGL2_11389023 | Cobalamin B12-binding/Radical SAM family protein   | 517  | 19008..20558             | 80_GENE_25 |
| 11389 | 22 | CGL2_11389022 | Ribulose-bisphosphate carboxylase (EC 4.1.1.39)    | 392  | complement(17625..18800) | 80_GENE_24 |
| 11389 | 21 | CGL2_11389021 | Protein of unknown function                        | 283  | 16774..17622             | 80_GENE_23 |
| 11389 | 20 | CGL2_11389020 | Periplasmic phosphate binding protein              | 364  | 15661..16752             | 80_GENE_22 |
| 11389 | 19 | CGL2_11389019 | Protein of unknown function                        | 321  | 14642..15604             | 80_GENE_21 |
| 11389 | 18 | CGL2_11389018 | Probable 2'-5' RNA ligase                          | 204  | 14041..14652             | 80_GENE_20 |
| 11389 | 17 | CGL2_11389017 | Protein of unknown function                        | 348  | complement(12885..13928) | 80_GENE_19 |
| 11389 | 16 | CGL2_11389016 | Protein of unknown function                        | 138  | complement(12452..12865) | 80_GENE_18 |
| 11389 | 15 | CGL2_11389015 | Putative ribosomal protein L11 methyltransferase   | 291  | complement(11580..12452) | 80_GENE_17 |
| 11389 | 14 | CGL2_11389014 | Orotidine 5'-phosphate decarboxylase (EC 4.1.1.23) | 251  | complement(10828..11580) | 80_GENE_16 |
| 11389 | 13 | CGL2_11389013 | Peptide deformylase (EC 3.5.1.88)                  | 184  | 10274..10825             | 80_GENE_15 |
| 11389 | 12 | CGL2_11389012 | Cob(I)alamin adenosyltransferase (EC 2.5.1.17)     | 179  | 9735..10271              | 80_GENE_14 |
| 11389 | 11 | CGL2_11389011 | Precorrin-3B methylase (EC 2.1.1.131)              | 273  | 8917..9735               | 80_GENE_13 |
| 11389 | 10 | CGL2_11389010 | Putative cobalamin biosynthesis protein (CbiG)     | 378  | 7740..8873               | 80_GENE_12 |
| 11389 | 9  | CGL2_11389009 | Precorrin-6B methyltransferase                     | 205  | 7126..7740               | 80_GENE_11 |
| 11389 | 8  | CGL2_11389008 | Precorrin 6y methyltransferase                     | 210  | 6466..7095               | 80_GENE_10 |
| 11389 | 7  | CGL2_11389007 | Cobalamin biosynthesis protein (CbiD)              | 375  | 5313..6437               | 80_GENE_9  |
| 11389 | 6  | CGL2_11389006 | Conserved hypothetical protein                     | 176  | 4676..5203               | 80_GENE_8  |
| 11389 | 5  | CGL2_11389005 | Large-conductance mechanosensitive channel         | 151  | complement(3535..3987)   | 80_GENE_7  |
| 11389 | 4  | CGL2_11389004 | transposase                                        | 122  | 2331..2696               | 80_GENE_6  |
| 11389 | 3  | CGL2_11389003 | transposase                                        | 79   | 2107..2343               | 80_GENE_5  |
| 11389 | 2  | CGL2_11389002 | transposase                                        | 200  | 1474..2073               | 80_GENE_4  |
| 11389 | 1  | CGL2_11389001 | transposase                                        | 334  | complement(405..1406)    | 80_GENE_3  |
| 10706 | 8  | CGL2_10706008 | Hypothetical protein                               | 264  | complement(10384..11175) | 80_GENE_1  |
| 10706 | 7  | CGL2_10706007 | Hypothetical protein                               | 454  | 8466..9827               |            |
| 10706 | 6  | CGL2_10706006 | DNA helicase                                       | 1573 | complement(3543..8261)   | 214_GENE_4 |
| 10706 | 5  | CGL2_10706005 | transposase                                        | 78   | 3207..3440               | 214_GENE_5 |
| 10706 | 4  | CGL2_10706004 | integrase fragment or transposase (Tn domain)      | 218  | 2594..3247               | 214_GENE_6 |
| 10706 | 3  | CGL2_10706003 | transposase?                                       | 49   | complement(1994..2140)   | 214_GENE_7 |

|           |    |                |                                                     |     |                          |              |
|-----------|----|----------------|-----------------------------------------------------|-----|--------------------------|--------------|
| 10706     | 2  | CGL2_10706002  | Hypothetical protein                                | 81  | complement(1752..1994)   | 214_GENE_8   |
| 10706     | 1  | CGL2_10706001  | Hypothetical protein                                | 507 | complement(114..1634)    |              |
| 11172     | 1  | CGL2_11172001  | Ribosomal protein L9                                | 150 | 873..1322                | 150_GENE_15  |
| 11172     | 2  | CGL2_11172002  | Ribosomal protein L34                               | 44  | 1415..1546               | 150_GENE_15a |
| 11172     | 3  | CGL2_11172003  | Protein of unknown function                         | 111 | 1567..1899               | 150_GENE_14a |
| 11172     | 4  | CGL2_11172004  | Protein of unknown function                         | 68  | 1878..2081               | 150_GENE_13a |
| 11172     | 5  | CGL2_11172005  | Putative inner-membrane protein                     | 511 | 2128..3660               | 150_GENE_13  |
| 11172     | 6  | CGL2_11172006  | TRNA modification GTPase TrmE                       | 445 | 3677..5011               | 150_GENE_12  |
| 11172     | 7  | CGL2_11172007  | Glucose-inhibited division protein A                | 605 | 5030..6844               | 150_GENE_11  |
| 11172     | 8  | CGL2_11172008  | Putative glucose-inhibited division protein B       | 210 | 6852..7481               | 150_GENE_10  |
| 11172     | 9  | CGL2_11172009  | Putative cobyrinic acid a,c-diamide synthase (CbiA) | 254 | 7532..8293               | 150_GENE_9   |
| 11172     | 10 | CGL2_11172010  | ParB-like partition protein                         | 284 | 8289..9140               | 150_GENE_8   |
| 11172     | 11 | CGL2_11172011  | Protein of unknown function                         | 132 | 9157..9552               | 150_GENE_7   |
| 11172     | 12 | CGL2_11172012  | tRNA (5-methylaminomethyl-2-thiouridylate)-methyl   | 361 | 9570..10652              | 150_GENE_6   |
| 11172     | 13 | CGL2_11172013  | DNA polymerase III, epsilon subunit                 | 265 | 10652..11446             | 150_GENE_5   |
| 11172     | 14 | CGL2_11172014  | Ribonuclease III (EC 3.1.26.3)                      | 375 | 11930..13054             | 150_GENE_4   |
| 11172     | 15 | CGL2_11172015  | Transposase                                         | 479 | 13375..14811             | 150_GENE_1   |
| 11172     | 16 | CGL2_11172016  | Protein of unknown function                         | 77  | 15149..15379             |              |
| 11172     | 17 | CGL2_11172017  | Ferredoxin                                          | 109 | complement(15419..15745) |              |
| 11172     | 18 | CGL2_11172018  | Protein of unknown function                         | 148 | 15949..16392             | 6_GENE_88a   |
| 11172     | 19 | CGL2_11172019  | Hypothetical protein                                | 161 | 16544..17026             | 6_GENE_88    |
| 11172     | 20 | CGL2_11172020  | UDP-3-O-acyl-N-acetylglucosamine deacetylase        | 298 | complement(17057..17950) | 6_GENE_87    |
| 11172     | 21 | CGL2_11172021  | Hypothetical protein                                | 101 | complement(18201..18503) | 6_GENE_85    |
| 11172     | 22 | CGL2_11172022  | Protein of unknown function                         | 520 | complement(18632..20191) | 6_GENE_84    |
| 11172     | 23 | CGL2_11172023  | Hypothetical protein                                | 180 | complement(20252..20791) | 6_GENE_83    |
| 11172     | 24 | CGL2_11172024  | Inositol monophosphatase (EC 3.1.3.25)              | 265 | 21032..21826             | 6_GENE_82    |
| 11172     | 25 | CGL2_11172025  | Putative peptidase M50 family                       | 264 | complement(21819..22610) | 6_GENE_81    |
| 11172     | 26 | CGL2_11172026  | Hypothetical protein                                | 106 | complement(22673..22990) | 6_GENE_80    |
| 11172     | 27 | CGL2_11172027  | Transposase                                         | 446 | complement(23400..24737) |              |
| 11172     | 28 | CGL2_11172028  | Trans-hexaprenyltranstransferase (EC 2.5.1.30)      | 330 | 24939..25928             | 6_GENE_79    |
| 11172     | 29 | CGL2_11172029  | Protein of unknown function                         | 426 | 25980..27257             | 6_GENE_78    |
| 11172     | 31 | CGL2_11172031  | Pseudouridylate synthases, 23S RNA-specific         | 340 | complement(27247..28266) | 6_GENE_77    |
| 11172     | 32 | CGL2_11172032  | Putative TPR-domain containing protein              | 327 | complement(28279..29259) | 6_GENE_76    |
| 11172     | 33 | CGL2_11172033  | Signal peptidase II (EC 3.4.23.36)                  | 179 | complement(29262..29798) | 6_GENE_75    |
| 11172     | 34 | CGL2_11172034  | Isoleucyl-tRNA synthetase (EC 6.1.1.5)              | 976 | complement(29798..32725) | 6_GENE_74    |
| 11172tRNA |    | CGL2_11172R001 | TRNA Val CAC                                        |     | 32816..32890             |              |
| 11172     | 35 | CGL2_11172035  | Transposase                                         | 396 | complement(33467..34654) |              |
| 11172     | 36 | CGL2_11172036  | Hypothetical protein                                | 88  | 35171..35434             | 6_GENE_73    |
| 11172     | 37 | CGL2_11172037  | Transposase                                         | 416 | 35505..36752             |              |
| 11172     | 38 | CGL2_11172038  | Conserved hypothetical protein                      | 192 | 36808..37383             |              |
| 11172     | 39 | CGL2_11172039  | Hypothetical protein                                | 96  | 37465..37752             | 6_GENE_73    |

|           |     |               |                                                    |      |                            |             |
|-----------|-----|---------------|----------------------------------------------------|------|----------------------------|-------------|
| 11172     | 40  | CGL2_11172040 | Formamidopyrimidine-DNA glycosylase (EC 3.2.2.23)  | 291  | complement(37655..38527)   | 6_GENE_72a  |
| 11172     | 41  | CGL2_11172041 | Conserved hypothetical protein                     | 343  | complement(38650..39678)   | 48_GENE_37  |
| 11172     | 42  | CGL2_11172042 | Putative aminoglycoside phosphotransferase         | 355  | 39815..40879               | 48_GENE_36  |
| 11172     | 43  | CGL2_11172043 | Nucleoside-diphosphate-sugar pyrophosphorylase in  | 240  | 40914..41633               | 48_GENE_35  |
| 11172     | 44  | CGL2_11172044 | Protein of unknown function                        | 384  | complement(41479..42630)   | 48_GENE_34  |
| 11172     | 45  | CGL2_11172045 | GTP-binding protein                                | 212  | 42767..43402               | 48_GENE_33  |
| 11172     | 46  | CGL2_11172046 | Putative peptidyl-prolyl cis-trans isomerase       | 340  | complement(43411..44430)   | 48_GENE_32  |
| 11172     | 47  | CGL2_11172047 | Putative peptidyl-prolyl cis-trans isomerase       | 324  | complement(44470..45441)   | 48_GENE_31  |
| 11172     | 48  | CGL2_11172048 | Probable peptidil-prolyl cis-trans isomerase       | 289  | complement(45451..46317)   | 48_GENE_30  |
| 11172     | 49  | CGL2_11172049 | Transcription-repair coupling factor               | 1154 | complement(46332..49793)   | 48_GENE_29  |
| 11172     | 50  | CGL2_11172050 | Cytidylyltransferase family protein                | 179  | complement(49793..50329)   | 48_GENE_28  |
| 11172     | 51  | CGL2_11172051 | Phosphoheptose isomerase                           | 203  | complement(50322..50930)   | 48_GENE_27  |
| 11172     | 52  | CGL2_11172052 | Glutamate-1-semialdehyde 2,1-aminomutase (EC 5.    | 437  | complement(50991..52301)   | 48_GENE_26  |
| 11172     | 53  | CGL2_11172053 | Protein of unknown function                        | 70   | 52765..52974               | 48_GENE_24  |
| 11172     | 54  | CGL2_11172054 | Protein of unknown function                        | 195  | 53079..53663               | 48_GENE_23  |
| 11172     | 55  | CGL2_11172055 | Pyruvate synthase alpha subunit (EC 1.2.7.1)       | 412  | 53966..55201               | 48_GENE_21  |
| 11172     | 56  | CGL2_11172056 | Pyruvate synthase beta subunit                     | 288  | 55283..56146               | 48_GENE_20  |
| 11172     | 57  | CGL2_11172057 | Putative ferredoxin oxidoreductase gamma subunit   | 232  | 56192..56887               | 48_GENE_19  |
| 11172     | 58  | CGL2_11172058 | Probable ferredoxin oxidoreductase epsilon subunit | 101  | 56918..57220               | 48_GENE_18  |
| 11172     | 59  | CGL2_11172059 | Protein of unknown function                        | 94   | 57305..57586               | 48_GENE_17  |
| 11172     | 60  | CGL2_11172060 | Protein of unknown function                        | 140  | 57595..58014               | 48_GENE_16a |
| 11172     | 61  | CGL2_11172061 | Pyruvate synthase alpha chain (EC 1.2.7.1)         | 406  | 58212..59429               | 48_GENE_16  |
| 11172     | 62  | CGL2_11172062 | Putative ferredoxin oxidoreductase beta subunit    | 296  | 59425..60312               | 48_GENE_15  |
| 11172     | 63  | CGL2_11172063 | Ferredoxin oxidoreductase gamma subunit            | 232  | 60338..61033               | 48_GENE_13  |
| 11172     | 64  | CGL2_11172064 | Protein of unknown function                        | 76   | 61285..61512               | 48_GENE_12  |
| 11172     | 65  | CGL2_11172065 | Probable ferredoxin oxidoreductase                 | 193  | 61593..62171               | 48_GENE_11  |
| 11172     | 66  | CGL2_11172066 | Protein of unknown function                        | 133  | complement(62234..62632)   | 48_GENE_10  |
| 11172     | 67  | CGL2_11172067 | Conserved hypothetical protein                     | 175  | complement(62787..63311)   | 48_GENE_9   |
| 11172     | 68  | CGL2_11172068 | Glutamyl-tRNA synthetase (EC 6.1.1.17)             | 474  | complement(63311..64732)   | 48_GENE_8   |
| 11172     | 69  | CGL2_11172069 | Protein of unknown function                        | 181  | 65060..65602               | 48_GENE_7   |
| 11172     | 70  | CGL2_11172070 | L-aspartate oxidase (EC 1.4.3.16)                  | 513  | 65610..67148               | 48_GENE_6   |
| 11172     | 71  | CGL2_11172071 | Putative heat shock protein DnaJ, N-terminal       | 284  | 67148..67999               | 48_GENE_5   |
| 11172     | 72  | CGL2_11172072 | Probable heat shock transcription regulator        | 108  | 68017..68340               | 48_GENE_4   |
| 11172     | 73  | CGL2_11172073 | Chaperone clpB                                     | 866  | 68430..71027               | 48_GENE_3   |
| 11172     | 74  | CGL2_11172074 | Probable bacterial regulatory protein, Fis family  | 178  | 71027..71560               | 48_GENE_2   |
| 11172     | 75  | CGL2_11172075 | Transposase                                        | 446  | 71731..73068               |             |
| 07502tRNA |     | CGL2_7502R001 | TRNA Val GAC                                       |      | 64..138                    |             |
| 11111     | 114 | CGL2_11111114 | Putative heavy metal efflux pump, CzcA family      | 1003 | complement(116616..119624) | 43_GENE_1   |
| 11111     | 113 | CGL2_11111113 | Putative secretion protein HlyD                    | 358  | complement(115543..116616) | 43_GENE_2   |
| 11111     | 112 | CGL2_11111112 | Protein of unknown function                        | 230  | 114799..115488             | 43_GENE_3   |
| 11111     | 111 | CGL2_11111111 | Putative Xaa-Pro aminopeptidase                    | 381  | 113650..114792             | 43_GENE_4   |

|       |     |               |                                                      |      |                            |             |
|-------|-----|---------------|------------------------------------------------------|------|----------------------------|-------------|
| 11111 | 110 | CGL2_11111110 | Probable O-methyltransferase family protein          | 220  | 112988..113647             | 43_GENE_5   |
| 11111 | 109 | CGL2_11111109 | Putative nitrite reductase small subunit             | 102  | complement(112445..112750) | 43_GENE_6   |
| 11111 | 108 | CGL2_11111108 | Hypothetical protein                                 | 75   | complement(112137..112361) | 43_GENE_7   |
| 11111 | 107 | CGL2_11111107 | Glucose-1-phosphate adenylyltransferase (EC 2.7.7.): | 419  | complement(110833..112089) | 43_GENE_8   |
| 11111 | 106 | CGL2_11111106 | Putative glycoside hydrolase, family 57              | 717  | complement(108683..110833) | 43_GENE_9   |
| 11111 | 105 | CGL2_11111105 | 4-alpha-glucanotransferase (EC 2.4.1.25)             | 697  | complement(106585..108675) | 43_GENE_10  |
| 11111 | 104 | CGL2_11111104 | Galactose-1-phosphate uridylyltransferase (EC 2.7.7  | 334  | complement(105563..106564) | 43_GENE_11  |
| 11111 | 103 | CGL2_11111103 | Probable aldolase                                    | 460  | complement(104127..105506) | 43_GENE_12  |
| 11111 | 102 | CGL2_11111102 | Putative glycoside hydrolase, family 57              | 529  | complement(102538..104124) | 43_GENE_13  |
| 11111 | 101 | CGL2_11111101 | Secretion protein HlyD                               | 363  | complement(100547..101635) | 43_GENE_14  |
| 11111 | 100 | CGL2_11111100 | Putative acriflavin resistance protein               | 1057 | complement(97266..100436)  | 43_GENE_15  |
| 11111 | 99  | CGL2_11111099 | Putative aminomethyltransferase                      | 334  | 96234..97235               | 43_GENE_16  |
| 11111 | 98  | CGL2_11111098 | Putative two component, sigma54 specific, transcript | 455  | complement(94731..96095)   | 43_GENE_17  |
| 11111 | 97  | CGL2_11111097 | Probable secretion protein HlyD                      | 403  | complement(93516..94724)   | 43_GENE_18  |
| 11111 | 96  | CGL2_11111096 | Putative outer membrane efflux protein               | 490  | complement(91979..93448)   | 43_GENE_19  |
| 11111 | 95  | CGL2_11111095 | Thioredoxin reductase (EC 1.8.1.9)                   | 334  | complement(90807..91808)   | 43_GENE_20  |
| 11111 | 94  | CGL2_11111094 | Protein of unknown function                          | 168  | complement(90304..90807)   | 43_GENE_21  |
| 11111 | 93  | CGL2_11111093 | Protein of unknown function                          | 408  | complement(89081..90304)   | 43_GENE_22  |
| 11111 | 92  | CGL2_11111092 | Protein of unknown function                          | 689  | complement(86764..88830)   | 43_GENE_23  |
| 11111 | 91  | CGL2_11111091 | Putative carboxylesterase                            | 230  | complement(86072..86761)   | 43_GENE_24  |
| 11111 | 90  | CGL2_11111090 | Protein of unknown function                          | 143  | complement(85668..86096)   | 43_GENE_25  |
| 11111 | 89  | CGL2_11111089 | Polypeptide deformylase (EC 3.5.1.31)                | 177  | complement(85138..85668)   | 43_GENE_26  |
| 11111 | 88  | CGL2_11111088 | Methionyl-tRNA formyltransferase (EC 2.1.2.9)        | 319  | complement(84189..85145)   | 43_GENE_27  |
| 11111 | 87  | CGL2_11111087 | Putative peptidase, M48 family                       | 295  | complement(83251..84135)   | 43_GENE_28  |
| 11111 | 86  | CGL2_11111086 | Ribulose-phosphate 3-epimerase (EC 5.1.3.1)          | 231  | complement(82559..83251)   | 43_GENE_29  |
| 11111 | 85  | CGL2_11111085 | Protein of unknown function                          | 149  | complement(81973..82419)   | 43_GENE_30  |
| 11111 | 84  | CGL2_11111084 | Putative cell shape determining protein (MreB/Mrl)   | 343  | complement(80891..81919)   | 277_GENE_2  |
| 11111 | 83  | CGL2_11111083 | Putative rod shape-determining protein MreC          | 281  | complement(80012..80854)   | 277_GENE_3  |
| 11111 | 82  | CGL2_11111082 | Hypothetical protein                                 | 157  | complement(79521..79991)   | 277_GENE_4  |
| 11111 | 81  | CGL2_11111081 | Peptidoglycan glycosyltransferase (EC 2.4.1.129)     | 644  | complement(77527..79458)   | 277_GENE_5  |
| 11111 | 80  | CGL2_11111080 | Putative rod shape-determining protein (RodA)        | 363  | complement(76439..77527)   | 277_GENE_6  |
| 11111 | 79  | CGL2_11111079 | Ribonucleases G and E                                | 526  | complement(74756..76333)   | 277_GENE_7  |
| 11111 | 78  | CGL2_11111078 | Hypothetical protein                                 | 280  | 73889..74728               | 277_GENE_8  |
| 11111 | 77  | CGL2_11111077 | Putative dihydroneopterin aldolase                   | 132  | 73494..73889               | 277_GENE_9  |
| 11111 | 76  | CGL2_11111076 | Protein of unknown function                          | 24   | 72894..72966               | 277_GENE_10 |
| 11111 | 75  | CGL2_11111075 | Protein of unknown function                          | 181  | 72952..73494               | 277_GENE_10 |
| 11111 | 74  | CGL2_11111074 | Putative ferredoxin                                  | 84   | complement(72362..72613)   | 426_GENE_1  |
| 11111 | 73  | CGL2_11111073 | Putative cobalamin B12-binding/Radical SAM family ;  | 626  | complement(70444..72321)   | 426_GENE_2  |
| 11111 | 72  | CGL2_11111072 | Ribosomal protein L13                                | 151  | complement(69959..70411)   | 426_GENE_3  |
| 11111 | 71  | CGL2_11111071 | Ribosomal protein S9                                 | 135  | complement(69562..69966)   | 426_GENE_4  |
| 11111 | 70  | CGL2_11111070 | N-acetyl-gamma-glutamyl-phosphate reductase (EC      | 343  | complement(68451..69479)   | 426_GENE_5  |

|       |    |               |                                                    |     |                          |             |
|-------|----|---------------|----------------------------------------------------|-----|--------------------------|-------------|
| 11111 | 69 | CGL2_11111069 | Arginine biosynthesis protein (ArgJ) (EC 2.3.1.35) | 404 | complement(67201..68412) | 426_GENE_6  |
| 11111 | 68 | CGL2_11111068 | Ribosomal protein S2                               | 274 | complement(66212..67033) | 13_GENE_68  |
| 11111 | 67 | CGL2_11111067 | Elongation factor Ts (EF-Ts)                       | 198 | complement(65550..66143) | 13_GENE_67  |
| 11111 | 66 | CGL2_11111066 | Uridylate kinase                                   | 236 | complement(64840..65547) | 13_GENE_66  |
| 11111 | 65 | CGL2_11111065 | Ribosome recycling factor                          | 184 | complement(64252..64803) | 13_GENE_65  |
| 11111 | 64 | CGL2_11111064 | Alanine racemase (EC 5.1.1.1)                      | 406 | complement(63015..64232) | 13_GENE_64  |
| 11111 | 63 | CGL2_11111063 | Putative integral membrane protein                 | 255 | complement(62248..63012) | 13_GENE_63  |
| 11111 | 62 | CGL2_11111062 | ABC transporter ATP-binding protein (EC 3.6.3.25)  | 264 | complement(61466..62257) | 13_GENE_62  |
| 11111 | 61 | CGL2_11111061 | Putative ABC transporter                           | 518 | complement(59841..61394) | 13_GENE_61  |
| 11111 | 60 | CGL2_11111060 | ResB-like family protein (poss cyt biosyn)         | 513 | complement(58137..59675) | 13_GENE_60  |
| 11111 | 59 | CGL2_11111059 | Putative cytochrome c biogenesis protein           | 283 | complement(57130..57978) | 13_GENE_59  |
| 11111 | 58 | CGL2_11111058 | Putative cytochrome c biogenesis protein           | 199 | complement(56521..57117) | 13_GENE_58  |
| 11111 | 57 | CGL2_11111057 | Putative thioredoxin family protein                | 171 | complement(55998..56510) | 13_GENE_57  |
| 11111 | 56 | CGL2_11111056 | Putative cytochrome c biogenesis protein (CcdA)    | 249 | complement(55204..55950) | 13_GENE_56  |
| 11111 | 55 | CGL2_11111055 | Geranylgeranyl reductase family protein            | 416 | complement(53919..55166) | 13_GENE_55  |
| 11111 | 54 | CGL2_11111054 | Probable protease family protein                   | 402 | complement(52714..53919) | 13_GENE_54  |
| 11111 | 53 | CGL2_11111053 | Primosomal protein N' (PriA)                       | 661 | 50781..52763             | 13_GENE_53  |
| 11111 | 52 | CGL2_11111052 | Regulatory protein                                 | 155 | 50317..50781             | 13_GENE_52  |
| 11111 | 51 | CGL2_11111051 | Glycine hydroxymethyltransferase (EC 2.1.2.1)      | 414 | 49048..50289             | 13_GENE_51  |
| 11111 | 50 | CGL2_11111050 | Ribose/galactose isomerase (EC 5.3.1.26)           | 158 | 48544..49017             | 13_GENE_50  |
| 11111 | 49 | CGL2_11111049 | Protein of unknown function                        | 181 | complement(47916..48458) | 13_GENE_49  |
| 11111 | 48 | CGL2_11111048 | Thymidylate kinase                                 | 229 | complement(47107..47793) | 13_GENE_48  |
| 11111 | 47 | CGL2_11111047 | Thymidylate kinase (EC 2.7.4.9)                    | 217 | complement(46457..47107) | 13_GENE_47  |
| 11111 | 46 | CGL2_11111046 | Putative Ppx/GppA phosphatase family protein       | 518 | 44901..46454             | 13_GENE_46  |
| 11111 | 45 | CGL2_11111045 | Protein of unknown function                        | 431 | complement(43510..44802) | 13_GENE_45  |
| 11111 | 44 | CGL2_11111044 | Ubiquinone/menaquinone biosynthesis methyltransfe  | 259 | complement(42687..43463) | 13_GENE_44  |
| 11111 | 43 | CGL2_11111043 | Putative radical SAM family protein                | 530 | complement(41093..42682) | 13_GENE_43  |
| 11111 | 42 | CGL2_11111042 | Protein of unknown function                        | 170 | complement(40580..41089) | 13_GENE_42  |
| 11111 | 41 | CGL2_11111041 | Putative 4-hydroxybenzoate polyprenyl transferase  | 287 | complement(39720..40580) | 13_GENE_41  |
| 11111 | 40 | CGL2_11111040 | Hypothetical protein                               | 38  | complement(39348..39461) | 13_GENE_39  |
| 11111 | 39 | CGL2_11111039 | Hypothetical protein                               | 85  | 39100..39354             | 13_GENE_39a |
| 11111 | 38 | CGL2_11111038 | Putative major facilitator superfamily transporter | 459 | complement(37599..38975) | 13_GENE_37  |
| 11111 | 37 | CGL2_11111037 | Putative potassium channel protein                 | 347 | complement(36548..37588) | 13_GENE_36  |
| 11111 | 36 | CGL2_11111036 | Acetylornithine aminotransferase (EC 2.6.1.11)     | 390 | complement(35308..36477) | 13_GENE_35  |
| 11111 | 35 | CGL2_11111035 | Ornithine carbamoyltransferase (EC 2.1.3.3)        | 309 | complement(34379..35305) | 13_GENE_34  |
| 11111 | 34 | CGL2_11111034 | Argininosuccinate synthase (EC 6.3.4.5)            | 408 | complement(33146..34369) | 13_GENE_33  |
| 11111 | 33 | CGL2_11111033 | Argininosuccinate lyase (EC 4.3.2.1)               | 467 | complement(31743..33143) | 13_GENE_32  |
| 11111 | 32 | CGL2_11111032 | Diaminopimelate decarboxylase (EC 4.1.1.20)        | 414 | complement(30307..31548) | 13_GENE_31  |
| 11111 | 31 | CGL2_11111031 | Protein of unknown function                        | 165 | complement(29817..30311) | 13_GENE_30  |
| 11111 | 30 | CGL2_11111030 | Dihydrodipicolinate synthase (EC 4.2.1.52)         | 295 | complement(28886..29770) | 13_GENE_29  |
| 11111 | 29 | CGL2_11111029 | Dihydrodipicolinate reductase (EC 1.3.1.26)        | 265 | complement(28083..28877) | 13_GENE_28  |

|       |    |               |                                                    |      |                          |            |
|-------|----|---------------|----------------------------------------------------|------|--------------------------|------------|
| 11111 | 28 | CGL2_11111028 | 5-carboxymethyl-2-hydroxymuconate delta-isomerase  | 267  | complement(27283..28083) | 13_GENE_27 |
| 11111 | 27 | CGL2_11111027 | Putative flagellar basal body rod protein          | 267  | complement(26200..27000) | 13_GENE_26 |
| 11111 | 26 | CGL2_11111026 | Flagellar basal body rod protein                   | 261  | complement(25392..26174) | 13_GENE_25 |
| 11111 | 25 | CGL2_11111025 | Hypothetical protein                               | 212  | complement(24742..25377) | 13_GENE_24 |
| 11111 | 24 | CGL2_11111024 | Protein of unknown function                        | 208  | complement(24129..24752) | 13_GENE_23 |
| 11111 | 23 | CGL2_11111023 | Putative flagellar P-ring protein                  | 354  | complement(23068..24129) | 13_GENE_22 |
| 11111 | 22 | CGL2_11111022 | Conserved hypothetical protein                     | 121  | complement(22706..23068) | 13_GENE_21 |
| 11111 | 21 | CGL2_11111021 | Putative flagellin                                 | 286  | complement(21816..22673) | 13_GENE_20 |
| 11111 | 20 | CGL2_11111020 | Protein of unknown function                        | 119  | complement(21336..21692) | 13_GENE_19 |
| 11111 | 19 | CGL2_11111019 | Protein of unknown function                        | 164  | complement(20802..21293) | 13_GENE_18 |
| 11111 | 18 | CGL2_11111018 | Flagellar hook-associated protein (FlgK)           | 561  | complement(19114..20796) | 13_GENE_17 |
| 11111 | 17 | CGL2_11111017 | Flagellar hook-associated protein (FlgL)           | 312  | complement(18148..19083) | 13_GENE_16 |
| 11111 | 16 | CGL2_11111016 | Putative carbon storage regulator (CsrA)           | 80   | complement(17841..18080) | 13_GENE_15 |
| 11111 | 15 | CGL2_11111015 | Protein of unknown function                        | 143  | complement(17413..17841) | 13_GENE_14 |
| 11111 | 14 | CGL2_11111014 | Putative flagellin                                 | 275  | complement(16416..17240) | 13_GENE_13 |
| 11111 | 13 | CGL2_11111013 | Putative flagellar hook-associated protein (FlhD)  | 479  | complement(14878..16314) | 13_GENE_12 |
| 11111 | 12 | CGL2_11111012 | Flagellar protein (FlhS)                           | 152  | complement(14398..14853) | 13_GENE_11 |
| 11111 | 11 | CGL2_11111011 | Hypothetical protein                               | 114  | complement(14049..14390) | 13_GENE_10 |
| 11111 | 10 | CGL2_11111010 | Conserved protein of unknown function              | 326  | complement(12893..13870) | 13_GENE_9  |
| 11111 | 9  | CGL2_11111009 | Putative SAM-dependent methyltransferases          | 780  | complement(10573..12912) | 13_GENE_8  |
| 11111 | 8  | CGL2_11111008 | Putative heptosyltransferase family protein        | 519  | complement(9002..10558)  | 13_GENE_7  |
| 11111 | 6  | CGL2_11111006 | Conserved hypothetical protein                     | 599  | complement(7213..9009)   | 13_GENE_6  |
| 11111 | 5  | CGL2_11111005 | Probable heptosyltransferase family protein        | 595  | complement(5429..7213)   | 13_GENE_5  |
| 11111 | 4  | CGL2_11111004 | Hypothetical protein                               | 217  | complement(4779..5429)   | 13_GENE_4  |
| 11111 | 2  | CGL2_11111002 | Probable TonB dependent receptor                   | 861  | complement(1953..4535)   | 13_GENE_3  |
| 11111 | 2  | CGL2_11111002 | Probable TonB dependent receptor                   | 861  | complement(1953..4535)   | 13_GENE_3  |
| 11111 | 1  | CGL2_11111001 | transposase                                        | 360  | complement(734..1813)    | 13_GENE_1  |
| 11195 | 47 | CGL2_11195047 | Protein of unknown function                        | 139  | complement(54662..55078) | 22_GENE_48 |
| 11195 | 46 | CGL2_11195046 | Protein of unknown function                        | 206  | complement(53810..54427) | 22_GENE_46 |
| 11195 | 45 | CGL2_11195045 | Inorganic diphosphatase (EC 3.6.1.1)               | 182  | complement(53169..53714) | 22_GENE_45 |
| 11195 | 44 | CGL2_11195044 | ABC transporter ATP-binding protein (EC 3.6.3.25)  | 234  | complement(52439..53140) | 22_GENE_44 |
| 11195 | 43 | CGL2_11195043 | Putative ABC transporter, permease protein         | 402  | complement(51234..52439) | 22_GENE_43 |
| 11195 | 42 | CGL2_11195042 | Secretion protein HlyD                             | 380  | complement(50072..51211) | 22_GENE_42 |
| 11195 | 41 | CGL2_11195041 | Flagellar motor switch protein FlhM)               | 338  | complement(48917..49930) | 22_GENE_41 |
| 11195 | 40 | CGL2_11195040 | Transcriptional regulator, NifA, Fis Family        | 550  | complement(47082..48731) | 22_GENE_39 |
| 11195 | 39 | CGL2_11195039 | NADH dehydrogenase (Quinone) precursor (EC 1.6.9   | 584  | complement(45113..46864) | 22_GENE_38 |
| 11195 | 38 | CGL2_11195038 | Probable NADH dehydrogenase I, M subunit           | 437  | complement(43807..45117) | 22_GENE_37 |
| 11195 | 37 | CGL2_11195037 | Protein of unknown function                        | 1139 | complement(40391..43807) | 22_GENE_36 |
| 11195 | 36 | CGL2_11195036 | Probable nitrogen regulatory protein P-II          | 114  | complement(40059..40400) | 22_GENE_35 |
| 11195 | 35 | CGL2_11195035 | Putative major facilitator superfamily transporter | 265  | 39251..40045             | 22_GENE_34 |
| 11195 | 34 | CGL2_11195034 | transposase                                        | 420  | 37992..39251             |            |

|           |    |                |                                                       |     |                          |            |
|-----------|----|----------------|-------------------------------------------------------|-----|--------------------------|------------|
| 11195     | 33 | CGL2_11195033  | Putative major facilitator superfamily transporter    | 159 | 37448..37924             | 22_GENE_34 |
| 11195     | 32 | CGL2_11195032  | Probable cellulose synthase operon protein C          | 964 | complement(34438..37329) | 22_GENE_33 |
| 11195     | 31 | CGL2_11195031  | glycosyltransferase                                   | 714 | complement(32307..34448) | 22_GENE_32 |
| 11195     | 30 | CGL2_11195030  | cyclic di-GMP binding protein                         | 737 | complement(30097..32307) | 22_GENE_31 |
| 11195     | 29 | CGL2_11195029  | Endoglucanase (EC 3.2.1.4)                            | 366 | complement(29000..30097) | 22_GENE_30 |
| 11195tRNA |    | CGL2_11195R001 | TRNA Gln CTG                                          |     | 28853..28926             |            |
| 11195     | 27 | CGL2_11195027  | Peptidoglycan glycosyltransferase (EC 2.4.1.129)      | 756 | 26508..28775             | 22_GENE_29 |
| 11195     | 26 | CGL2_11195026  | Protein of unknown function                           | 125 | complement(26027..26401) | 22_GENE_28 |
| 11195     | 25 | CGL2_11195025  | Putative outer membrane protein                       | 512 | complement(24378..25913) | 22_GENE_27 |
| 11195     | 24 | CGL2_11195024  | Protein of unknown function                           | 247 | complement(23602..24342) | 22_GENE_26 |
| 11195     | 23 | CGL2_11195023  | Hypothetical protein                                  | 227 | complement(22935..23615) | 22_GENE_25 |
| 11195     | 22 | CGL2_11195022  | DNA repair protein (RadC)                             | 237 | complement(22096..22806) | 22_GENE_24 |
| 11195     | 21 | CGL2_11195021  | ABC1 family transporter                               | 557 | 20394..22064             | 22_GENE_23 |
| 11195     | 20 | CGL2_11195020  | Protein of unknown function                           | 523 | 18783..20351             | 22_GENE_22 |
| 11195     | 19 | CGL2_11195019  | Protein of unknown function                           | 212 | complement(17924..18559) | 22_GENE_21 |
| 11195     | 18 | CGL2_11195018  | Adenylosuccinate synthase (EC 6.3.4.4)                | 432 | 16650..17945             | 22_GENE_20 |
| 11195     | 17 | CGL2_11195017  | Protein of unknown function                           | 104 | 16198..16509             | 22_GENE_19 |
| 11195     | 16 | CGL2_11195016  | Protein of unknown function                           | 547 | complement(14171..15811) | 22_GENE_18 |
| 11195     | 15 | CGL2_11195015  | Putative two component transcriptional regulator, wii | 259 | complement(13236..14012) | 22_GENE_17 |
| 11195     | 14 | CGL2_11195014  | Hypothetical protein                                  | 112 | complement(12901..13236) | 22_GENE_15 |
| 11195     | 13 | CGL2_11195013  | Periplasmic phosphate binding protein                 | 372 | complement(11721..12836) | 22_GENE_14 |
| 11195     | 12 | CGL2_11195012  | Phosphate ABC transporter, permease protein (PstC)    | 340 | complement(10497..11516) | 22_GENE_12 |
| 11195     | 11 | CGL2_11195011  | Phosphate transport system permease protein 2         | 303 | complement(9581..10489)  | 22_GENE_11 |
| 11195     | 10 | CGL2_11195010  | Phosphate import ATP-binding protein (PstB) (EC 3.6   | 250 | complement(8801..9550)   | 22_GENE_10 |
| 11195     | 9  | CGL2_11195009  | Phosphate uptake regulator (PhoU)                     | 217 | complement(8122..8772)   | 22_GENE_9  |
| 11195     | 8  | CGL2_11195008  | Thymidylate synthase (ThyX)                           | 272 | 6933..7748               | 22_GENE_8  |
| 11195     | 7  | CGL2_11195007  | Protein of unknown function                           | 419 | 5429..6685               | 22_GENE_7  |
| 11195     | 6  | CGL2_11195006  | Aldehyde dehydrogenase (EC 1.2.1.3)                   | 502 | complement(3768..5273)   | 22_GENE_6  |
| 11195     | 5  | CGL2_11195005  | Hypothetical protein                                  | 52  | 3603..3758               | 22_GENE_5  |
| 11195     | 4  | CGL2_11195004  | Fructose-1,6-bisphosphatase (EC 3.1.3.11)             | 335 | 2480..3484               | 22_GENE_4  |
| 11195     | 3  | CGL2_11195003  | Hypothetical protein                                  | 139 | 1993..2409               | 22_GENE_3a |
| 11195     | 2  | CGL2_11195002  | Protein of unknown function                           | 150 | 1544..1993               | 22_GENE_3  |
| 11195     | 1  | CGL2_11195001  | Probable histone deacetylase family protein           | 322 | 541..1506                | 22_GENE_2  |
| 11364     | 1  | CGL2_11364001  | Transcription termination factor Rho                  | 416 | 455..1702                | 174_GENE_2 |
| 11364     | 2  | CGL2_11364002  | Ribosomal protein L31                                 | 68  | 1766..1969               | 174_GENE_3 |
| 11364     | 3  | CGL2_11364003  | Peptide chain release factor 1                        | 361 | 1982..3064               | 174_GENE_4 |
| 11364     | 4  | CGL2_11364004  | Modification methylase (HemK)                         | 293 | 3064..3942               | 174_GENE_5 |
| 11364     | 5  | CGL2_11364005  | UDP-N-acetylglucosamine 1-carboxyvinyltransferase     | 442 | 3951..5276               | 174_GENE_6 |
| 11364     | 6  | CGL2_11364006  | ATP phosphoribosyltransferase (EC 2.4.2.17)           | 205 | 5324..5938               | 174_GENE_7 |
| 11364     | 7  | CGL2_11364007  | Histidinol dehydrogenase (EC 1.1.1.23) (HDH)          | 445 | 5975..7309               | 174_GENE_8 |
| 11364     | 8  | CGL2_11364008  | Histidinol-phosphate aminotransferase (EC 2.6.1.9)    | 359 | 7309..8385               | 174_GENE_9 |

|           |    |                |                                                         |     |                          |             |
|-----------|----|----------------|---------------------------------------------------------|-----|--------------------------|-------------|
| 11364     | 9  | CGL2_11364009  | Imidazoleglycerol-phosphate dehydratase (EC 4.2.1.      | 210 | 8385..9014               | 174_GENE_10 |
| 11364     | 10 | CGL2_11364010  | Imidazole glycerol phosphate synthase, glutamine ar     | 211 | 9014..9646               | 174_GENE_11 |
| 11364     | 11 | CGL2_11364011  | 1-(5-phosphoribosyl)-5-[(5-phosphoribosylamino)me       | 247 | 9627..10367              | 174_GENE_12 |
| 11364     | 12 | CGL2_11364012  | Histidine biosynthesis protein (HisF) (EC 5.3.1.16)     | 255 | 10360..11124             | 174_GENE_13 |
| 11364     | 13 | CGL2_11364013  | Putative histidine biosynthesis bifunctional protein (H | 233 | 11124..11822             | 174_GENE_14 |
| 11364     | 14 | CGL2_11364014  | Putative histidine triad (HIT) protein                  | 118 | 11822..12175             | 174_GENE_15 |
| 11364     | 15 | CGL2_11364015  | Putative histone-like DNA-binding protein               | 102 | complement(12204..12509) | 174_GENE_16 |
| 11364     | 16 | CGL2_11364016  | Ribosomal protein S21                                   | 65  | 12847..13041             |             |
| 11364     | 17 | CGL2_11364017  | Conserved protein of unknown function                   | 139 | 13104..13520             | 224_GENE_1  |
| 11364     | 18 | CGL2_11364018  | DNA primase                                             | 461 | 13789..15171             | 224_GENE_3  |
| 11364     | 19 | CGL2_11364019  | RNA polymerase, sigma 38 subunit, RpoS                  | 598 | 15232..17025             | 224_GENE_4  |
| 11364tRNA |    | CGL2_11364R001 | TRNA Met CAT                                            |     | 17030..17104             |             |
| 11364     | 20 | CGL2_11364020  | Conserved protein of unknown function                   | 262 | 17153..17938             | 224_GENE_5  |
| 11364     | 21 | CGL2_11364021  | Putative ribonuclease H                                 | 134 | 17938..18339             | 224_GENE_6  |
| 11364     | 22 | CGL2_11364022  | Putative metal dependent phosphohydrolase               | 467 | 18765..20165             | 224_GENE_7  |
| 11364     | 23 | CGL2_11364023  | Protein of unknown function                             | 110 | 20322..20651             | 224_GENE_8  |
| 11364     | 24 | CGL2_11364024  | Putative transglycosylase                               | 220 | complement(20568..21227) | 224_GENE_9  |
| 11364     | 25 | CGL2_11364025  | Protein of unknown function                             | 298 | 21408..22301             | 224_GENE_10 |
| 11364     | 26 | CGL2_11364026  | Putative heat shock protein Hsp20                       | 152 | 22401..22856             | 288_GENE_9  |
| 11364     | 27 | CGL2_11364027  | ATPase components of ABC transporters wi                | 643 | 23133..25061             | 288_GENE_8  |
| 11364     | 28 | CGL2_11364028  | Probable phosphohydrolase                               | 298 | 25169..26062             | 288_GENE_7  |
| 11364     | 29 | CGL2_11364029  | Ribonuclease PH (EC 2.7.7.56)                           | 245 | 26163..26897             | 288_GENE_6  |
| 11364     | 30 | CGL2_11364030  | Putative Ham1-like protein                              | 198 | 26897..27490             | 288_GENE_5  |
| 11364     | 31 | CGL2_11364031  | Beta-N-acetylhexosaminidase (EC 3.2.1.52)               | 342 | 27490..28515             | 288_GENE_4  |
| 11364     | 32 | CGL2_11364032  | Glutamate racemase (EC 5.1.1.3)                         | 314 | 28515..29456             | 288_GENE_3  |
| 11364     | 33 | CGL2_11364033  | Putative peptidase C26                                  | 239 | complement(29329..30045) | 288_GENE_2  |
| 11364     | 34 | CGL2_11364034  | Putative ATP-dependent RNA helicase                     | 444 | complement(30035..31366) | 288_GENE_1  |
| 11364     | 35 | CGL2_11364035  | Hypothetical protein                                    | 32  | 31851..31946             | 175_GENE_1  |
| 11364     | 36 | CGL2_11364036  | Conserved protein of unknown function                   | 165 | 32123..32617             | 175_GENE_2  |
| 11364     | 37 | CGL2_11364037  | Hypothetical protein                                    | 53  | complement(32842..33000) | 175_GENE_3  |
| 11364     | 38 | CGL2_11364038  | Phosphoglycerate mutase (EC 5.4.2.1)                    | 223 | complement(33000..33668) | 175_GENE_4  |
| 11364     | 39 | CGL2_11364039  | Lipoate synthase                                        | 316 | complement(33777..34724) | 175_GENE_5  |
| 11364     | 40 | CGL2_11364040  | Mutative metal dependent phosphohydrolase               | 413 | complement(34808..36046) | 175_GENE_6  |
| 11364     | 41 | CGL2_11364041  | Glycogen debranching enzyme GlgX (EC 3.2.1.68)          | 714 | 36540..38681             | 175_GENE_8  |
| 11364     | 42 | CGL2_11364042  | Protein of unknown function                             | 143 | 38744..39172             | 175_GENE_9  |
| 11364     | 43 | CGL2_11364043  | Putative major facilitator superfamily transporter      | 420 | complement(39227..40486) | 175_GENE_10 |
| 11364     | 44 | CGL2_11364044  | Putative beta-lactamase family protein                  | 290 | complement(40595..41464) | 175_GENE_11 |
| 11364     | 45 | CGL2_11364045  | Hypothetical protein                                    | 135 | 41533..41937             | 175_GENE_12 |
| 11364     | 46 | CGL2_11364046  | Protein of unknown function                             | 398 | 42122..43315             | 175_GENE_13 |
| 11364     | 47 | CGL2_11364047  | Conserved protein of unknown function                   | 657 | complement(43598..45568) | 294_GENE_2  |
| 11364     | 48 | CGL2_11364048  | Protein of unknown function                             | 281 | complement(45602..46444) | 294_GENE_3  |

|           |    |                |                                                        |      |                          |                      |
|-----------|----|----------------|--------------------------------------------------------|------|--------------------------|----------------------|
| 11364     | 49 | CGL2_11364049  | Hypothetical protein                                   | 108  | 46617..46940             | 294_GENE_4           |
| 11364     | 50 | CGL2_11364050  | Hypothetical protein                                   | 81   | 46928..47170             | 294_GENE_5           |
| 11364     | 51 | CGL2_11364051  | Probable DNA helicase                                  | 455  | 47170..48534             | 294_GENE_6           |
| 11364     | 52 | CGL2_11364052  | Hypothetical protein                                   | 316  | 48494..49441             | 170_GENE_15          |
| 11364     | 53 | CGL2_11364053  | Conserved hypothetical protein                         | 466  | complement(49749..51146) | 170_GENE_14          |
| 11364     | 54 | CGL2_11364054  | Hypothetical protein                                   | 106  | 51487..51804             | 170_GENE_13          |
| 11364     | 55 | CGL2_11364055  | Hypothetical protein                                   | 162  | 51855..52340             | 170_GENE_12          |
| 11364     | 56 | CGL2_11364056  | Protein of unknown function                            | 204  | 52363..52974             | 170_GENE_10          |
| 11364     | 57 | CGL2_11364057  | Hypothetical protein                                   | 73   | 52974..53192             | 170_GENE_9           |
| 11364     | 58 | CGL2_11364058  | Hypothetical protein                                   | 197  | 53384..53974             | 170_GENE_8           |
| 11364     | 59 | CGL2_11364059  | Probable TrwB protein                                  | 672  | 53980..55995             | 170_GENE_7           |
| 11364     | 60 | CGL2_11364060  | Hypothetical protein                                   | 59   | 55995..56171             | 170_GENE_6           |
| 11364     | 61 | CGL2_11364061  | Probable TrwC protein                                  | 1128 | 56174..59557             | 170_GENE_5           |
| 11364     | 62 | CGL2_11364062  | Hypothetical protein                                   | 60   | 59578..59757             | 170_GENE_4           |
| 10641     | 21 | CGL2_10641021  | Putative transcriptional activator                     | 80   | 13143..13382             | 5-way_CG_LeptolI_sci |
| 10641     | 20 | CGL2_10641020  | Probable transposase                                   | 162  | complement(13425..13910) | 5-way_CG_LeptolI_sci |
| 10641     | 19 | CGL2_10641019  | Hypothetical protein                                   | 85   | complement(12759..13013) | 170_GENE_1a          |
| 10641     | 17 | CGL2_10641017  | Probable conjugugal transfer protein TraB              | 434  | complement(11387..12688) | 170_GENE_1           |
| 10641     | 17 | CGL2_10641017  | Probable conjugugal transfer protein TraB              | 434  | complement(11387..12688) | 170_GENE_1           |
| 10641     | 16 | CGL2_10641016  | Hypothetical protein                                   | 204  | complement(10760..11371) | 5-way_CG_LeptolI_sci |
| 10641     | 15 | CGL2_10641015  | Conserved protein of unknown function                  | 153  | complement(10284..10742) | 5-way_CG_LeptolI_sci |
| 10641     | 14 | CGL2_10641014  | Putative phage integrase                               | 325  | 9275..10249              | 5-way_CG_LeptolI_sci |
| 10641tRNA |    | CGL2_10641R001 | TRNA Leu TAA                                           |      | 9088..9146               |                      |
| 10641     | 13 | CGL2_10641013  | Putative metallophosphoesterase                        | 251  | 8064..8816               | 212_GENE_14          |
| 10641     | 12 | CGL2_10641012  | N-6 DNA methylase                                      | 524  | complement(6361..7932)   | 212_GENE_12          |
| 10641     | 11 | CGL2_10641011  | Hypothetical protein                                   | 95   | complement(6084..6368)   | 212_GENE_11          |
| 10641     | 10 | CGL2_10641010  | Hypothetical protein                                   | 74   | complement(5863..6084)   | 212_GENE_10          |
| 10641     | 9  | CGL2_10641009  | Hypothetical protein                                   | 77   | complement(5626..5856)   | 212_GENE_9           |
| 10641     | 8  | CGL2_10641008  | Hypothetical protein                                   | 133  | complement(4951..5349)   | 212_GENE_8           |
| 10641     | 7  | CGL2_10641007  | Hypothetical protein                                   | 116  | complement(4448..4795)   | 212_GENE_7           |
| 10641     | 6  | CGL2_10641006a | Hypothetical protein                                   | 98   | complement(3943..4236)   |                      |
| 10641     | 6  | CGL2_10641006  | Putative nucleotidyltransferase                        | 132  | complement(3495..3890)   | 212_GENE_6           |
| 10641     | 5  | CGL2_10641005  | Putative Type I restriction modification system, speci | 533  | complement(1904..3502)   | 212_GENE_5           |
| 10641     | 4  | CGL2_10641004  | Hypothetical protein                                   | 73   | complement(1547..1765)   | 212_GENE_4           |
| 10641     | 3  | CGL2_10641003  | Putative DNA damage inducible protein J                | 78   | complement(1263..1496)   | 212_GENE_3           |
| 10641     | 2  | CGL2_10641002  | Hypothetical protein                                   | 130  | complement(827..1216)    | 212_GENE_2           |
| 10641     | 1  | CGL2_10641001  | Hypothetical protein                                   | 106  | complement(532..849)     | 212_GENE_1           |
| 11346     | 1  | CGL2_11346001  | ABC transporter, ATP-binding subunit                   | 239  | complement(594..1310)    | 232_GENE_1           |
| 11346     | 2  | CGL2_11346002  | Conserved hypothetical protein                         | 222  | complement(1332..1997)   | 232_GENE_2           |
| 11346     | 3  | CGL2_11346003  | Hypothetical protein                                   | 188  | complement(3384..3947)   | 232_GENE_3           |
| 11346     | 4  | CGL2_11346004  | ABC transporter, ATP-binding subunit                   | 389  | complement(3957..5123)   | 232_GENE_4           |

|           |     |                |                                                   |      |                          |             |
|-----------|-----|----------------|---------------------------------------------------|------|--------------------------|-------------|
| 11346     | 5   | CGL2_11346005  | Hypothetical protein                              | 94   | complement(5303..5584)   | 232_GENE_5  |
| 11346     | 6   | CGL2_11346006  | Hypothetical protein                              | 344  | 5713..6744               | 232_GENE_6  |
| 11346     | 7   | CGL2_11346007  | Hypothetical protein                              | 233  | 6957..7655               | 232_GENE_6a |
| 11346     | 8   | CGL2_11346008  | Conserved hypothetical protein                    | 93   | complement(7652..7930)   | 232_GENE_8  |
| 11346     | 9   | CGL2_11346009  | Conserved hypothetical protein                    | 98   | complement(7937..8230)   | 232_GENE_9  |
| 11346     | 10  | CGL2_11346010  | transposase                                       | 313  | 8499..9437               | 579_GENE_7  |
| 11346     | 11  | CGL2_11346011  | Hypothetical protein                              | 148  | 9684..10127              | 232_GENE_12 |
| 11346     | 12  | CGL2_11346012  | Hypothetical protein                              | 223  | complement(10375..11043) |             |
| 11346     | 13  | CGL2_11346013  | transposase                                       | 374  | complement(11114..12235) | 579_GENE_3  |
| 11346     | 14  | CGL2_11346014  | transposase                                       | 315  | 12265..13209             | 579_GENE_2  |
| 11346     | 15  | CGL2_11346015  | transposase                                       | 153  | 12951..13409             | 579_GENE_2  |
| 11346     | 16  | CGL2_11346016  | Hypothetical protein                              | 138  | 13409..13822             | 579_GENE_1  |
| 11346     | 16a | CGL2_11346016a | Hypothetical protein                              | 118  | complement(13811..14164) |             |
| 11346     | 17  | CGL2_11346017  | Protein of unknown function                       | 146  | complement(14167..14604) | 27_GENE_52  |
| 11346     | 18  | CGL2_11346018  | Protein of unknown function                       | 84   | complement(14607..14858) | 27_GENE_51  |
| 11346     | 19  | CGL2_11346019  | Hypothetical protein                              | 92   | complement(14976..15251) | 27_GENE_50  |
| 11346     | 20  | CGL2_11346020  | Conserved protein of unknown function             | 156  | complement(15301..15768) | 27_GENE_49  |
| 11346     | 21  | CGL2_11346021  | Conserved hypothetical protein                    | 127  | complement(16120..16500) | 27_GENE_48  |
| 11346     | 22  | CGL2_11346022  | Putative helicase                                 | 1625 | complement(16487..21361) | 27_GENE_47  |
| 11346     | 22  | CGL2_11346022  | Putative helicase                                 | 1625 | complement(16487..21361) | 27_GENE_47  |
| 11346     | 24  | CGL2_11346024  | Protein of unknown function                       | 268  | complement(21476..22279) | 27_GENE_46  |
| 11346     | 25  | CGL2_11346025  | Probable phage integrase                          | 105  | complement(22282..22596) | 27_GENE_45a |
| 11346     | 26  | CGL2_11346026  | Probable phage integrase CG confirms was misssemt | 146  | complement(22394..22831) | 27_GENE_45  |
| 11346     | 27  | CGL2_11346027  | integrase                                         | 127  | 22955..23335             | 27_GENE_44  |
| 11346     | 28  | CGL2_11346028  | Protein of unknown function                       | 193  | complement(23537..24115) | 27_GENE_43  |
| 11346     | 29  | CGL2_11346029  | Conserved hypothetical protein                    | 359  | complement(24115..25191) | 27_GENE_42  |
| 11346     | 30  | CGL2_11346030  | Conserved protein of unknown function             | 423  | complement(25194..26462) | 27_GENE_41  |
| 11346     | 31  | CGL2_11346031  | Putative phage shock protein A (PspA)             | 225  | complement(26465..27139) | 27_GENE_40  |
| 11346     | 32  | CGL2_11346032  | Protein of unknown function                       | 218  | complement(27185..27838) | 27_GENE_39  |
| 11346     | 33  | CGL2_11346033  | Conserved protein of unknown function             | 188  | 28016..28579             | 27_GENE_38  |
| 11346     | 34  | CGL2_11346034  | HAD-superfamily hydrolase, subfamily IA           | 230  | complement(28558..29247) | 27_GENE_37  |
| 11346tRNA |     | CGL2_11346R001 | TRNA Glu CTC                                      |      | complement(29317..29392) |             |
| 11346     | 35  | CGL2_11346035  | Protein of unknown function                       | 148  | 29468..29911             | 27_GENE_36  |
| 11346     | 36  | CGL2_11346036  | Protein of unknown function                       | 151  | complement(29907..30359) | 27_GENE_35  |
| 11346     | 37  | CGL2_11346037  | Protein of unknown function                       | 536  | 30492..32099             | 27_GENE_34  |
| 11346     | 38  | CGL2_11346038  | Putative LD-carboxypeptidase family protein       | 319  | complement(32110..33066) | 27_GENE_33  |
| 11346     | 39  | CGL2_11346039  | Protein of unknown function                       | 89   | complement(33036..33302) | 27_GENE_32  |
| 11346     | 40  | CGL2_11346040  | Putative cobyrinic acid a,c-diamide synthase      | 208  | complement(33308..33931) | 27_GENE_31  |
| 11346     | 41  | CGL2_11346041  | Putative creatininase                             | 251  | complement(33951..34703) | 27_GENE_30  |
| 11346     | 42  | CGL2_11346042  | Putative phytoene synthase                        | 320  | 34825..35784             | 27_GENE_29  |
| 11346     | 43  | CGL2_11346043  | Putative amine oxidase                            | 491  | 35780..37252             | 27_GENE_28  |

|           |    |                |                                                       |     |                          |             |
|-----------|----|----------------|-------------------------------------------------------|-----|--------------------------|-------------|
| 11346     | 44 | CGL2_11346044  | Putative phytoene synthase                            | 317 | 37252..38202             | 27_GENE_27  |
| 11346     | 45 | CGL2_11346045  | Putative beta-lactamase family protein                | 352 | complement(38166..39221) | 27_GENE_26  |
| 11346     | 46 | CGL2_11346046  | Putative peptidase U62, modulator of DNA gyrase       | 485 | 39408..40862             | 27_GENE_25  |
| 11346     | 47 | CGL2_11346047  | Putative peptidase U62, modulator of DNA gyrase       | 452 | 40862..42217             | 27_GENE_24  |
| 11346     | 48 | CGL2_11346048  | Putative decarboxylase family protein                 | 214 | 42217..42858             | 27_GENE_23  |
| 11346     | 49 | CGL2_11346049  | Protein of unknown function                           | 247 | complement(42877..43617) | 27_GENE_22  |
| 11346     | 50 | CGL2_11346050  | DNA repair protein Rada                               | 461 | 43753..45135             | 27_GENE_21  |
| 11346     | 51 | CGL2_11346051  | Probable glycoprotein endopeptidase                   | 215 | 45135..45779             | 27_GENE_20  |
| 11346     | 52 | CGL2_11346052  | Ribosomal-protein-alanine acetyltransferase           | 204 | 45763..46374             | 27_GENE_19  |
| 11346     | 53 | CGL2_11346053  | Protein of unknown function                           | 78  | 46477..46710             | 27_GENE_18  |
| 11346     | 54 | CGL2_11346054  | Probable twin-arginine translocation protein (TatA/E) | 99  | 46716..47012             | 27_GENE_17  |
| 11346     | 55 | CGL2_11346055  | Sec-independent protein translocase                   | 252 | 47005..47760             | 27_GENE_16  |
| 11346     | 56 | CGL2_11346056  | Putative undecaprenol kinase                          | 285 | 47857..48711             | 27_GENE_15  |
| 11346     | 57 | CGL2_11346057  | Formate--tetrahydrofolate ligase (EC 6.3.4.3)         | 557 | 48859..50529             | 27_GENE_14  |
| 11346     | 58 | CGL2_11346058  | Protein of unknown function                           | 642 | 50529..52454             | 27_GENE_13  |
| 11346     | 59 | CGL2_11346059  | Di-trans-poly-cis-decaprenylcistransferase (EC 2.5.1. | 264 | 52460..53251             | 27_GENE_12  |
| 11346     | 60 | CGL2_11346060  | Putative phosphatidate cytidyltransferase             | 279 | 53251..54087             | 27_GENE_11  |
| 11346     | 61 | CGL2_11346061  | 1-deoxy-D-xylulose 5-phosphate reductoisomerase (     | 393 | 54112..55290             | 27_GENE_10  |
| 11346     | 62 | CGL2_11346062  | Peptidase M50, putative membrane-associated zinc r    | 354 | 55317..56378             | 27_GENE_9   |
| 11346     | 63 | CGL2_11346063  | 4-hydroxy-3-methylbut-2-en-1-yl diphosphate synth     | 377 | 56444..57574             | 27_GENE_8   |
| 11346     | 64 | CGL2_11346064  | Prolyl-tRNA synthetase                                | 422 | 57591..58856             | 27_GENE_7   |
| 11346     | 65 | CGL2_11346065  | Conserved hypothetical protein                        | 164 | 58863..59354             | 27_GENE_6   |
| 11346     | 66 | CGL2_11346066  | Ribosomal protein S32                                 | 37  | 59409..59519             | 27_GENE_5   |
| 11346     | 67 | CGL2_11346067  | Ribosomal protein S32                                 | 23  | 59519..59587             | 27_GENE_5   |
| 11346     | 68 | CGL2_11346068  | Fatty acid/phospholipid synthesis protein (PlsX)      | 331 | 59603..60595             | 27_GENE_4   |
| 11346     | 69 | CGL2_11346069  | 3-oxoacyl-(Acyl-carrier-protein) synthase III (EC 2.3 | 341 | 60595..61617             | 27_GENE_3   |
| 11346     | 70 | CGL2_11346070  | Malonyl CoA-acyl carrier protein transacylase (EC 2.3 | 314 | 61617..62558             | 27_GENE_2   |
| 11346     | 71 | CGL2_11346071  | Malonyl CoA-acyl carrier protein transacylase (EC 2.3 | 251 | 62558..63310             | 27_GENE_1   |
| 11346     | 72 | CGL2_11346072  | Acyl carrier protein (ACP)                            | 76  | 63392..63619             | 295_GENE_10 |
| 11346     | 73 | CGL2_11346073  | 3-oxoacyl-(Acyl-carrier-protein) synthase II (EC 2.3. | 419 | 63622..64878             | 295_GENE_9  |
| 11346     | 74 | CGL2_11346074  | Ribonuclease III (EC 3.1.26.3)                        | 247 | 64979..65719             | 295_GENE_8  |
| 11346     | 75 | CGL2_11346075  | hypothetical protein predicted by Glimmer/Critic      | 382 | complement(65748..66893) | 295_GENE_7  |
| 11346     | 76 | CGL2_11346076  | Hypothetical protein                                  | 354 | complement(66911..67972) | 295_GENE_6  |
| 11346     | 77 | CGL2_11346077  | Phosphoribosylformylglycinamidine cyclo-ligase (EC 6  | 350 | 68302..69351             | 295_GENE_5  |
| 11346     | 78 | CGL2_11346078  | Phosphoribosylglycinamide formyltransferase (EC 2.1   | 207 | 69338..69958             | 295_GENE_4  |
| 11346tRNA |    | CGL2_11346R002 | TRNA Ala CGC                                          |     | 70039..70114             |             |
| 11346     | 79 | CGL2_11346079  | Hypothetical protein                                  | 69  | complement(70138..70344) | 295_GENE_3  |
| 11346     | 80 | CGL2_11346080  | 6-phosphogluconate dehydrogenase (decarboxylating)    | 339 | 70440..71456             | 135_GENE_12 |
| 11346     | 81 | CGL2_11346081  | Glucose-6-phosphate dehydrogenase (EC 1.1.1.49)       | 468 | 71461..72864             | 135_GENE_11 |
| 11346     | 82 | CGL2_11346082  | Serine 3-dehydrogenase (EC 1.1.1.276)                 | 247 | 72942..73682             | 135_GENE_10 |
| 11346     | 83 | CGL2_11346083  | Conserved protein of unknown function                 | 344 | 73748..74779             | 135_GENE_9  |

|       |     |               |                                                            |     |                            |            |
|-------|-----|---------------|------------------------------------------------------------|-----|----------------------------|------------|
| 11346 | 84  | CGL2_11346084 | Methyl-accepting chemotaxis sensory transducer             | 577 | complement(74814..76544)   | 135_GENE_8 |
| 11346 | 85  | CGL2_11346085 | Amino-acid N-acetyltransferase (EC 2.3.1.1)                | 448 | 76933..78276               | 135_GENE_6 |
| 11346 | 86  | CGL2_11346086 | Protein of unknown function                                | 207 | 78770..79390               | 135_GENE_5 |
| 11346 | 87  | CGL2_11346087 | Putative response regulator receiver protein               | 322 | 79589..80554               | 135_GENE_4 |
| 11346 | 88  | CGL2_11346088 | Phosphoenolpyruvate synthase (EC 2.7.9.2)                  | 799 | 80931..83327               | 135_GENE_3 |
| 11346 | 89  | CGL2_11346089 | GTP-binding protein (EngA)                                 | 469 | complement(83398..84804)   | 135_GENE_2 |
| 11346 | 90  | CGL2_11346090 | Protein of unknown function                                | 230 | complement(84804..85493)   | 135_GENE_1 |
| 11346 | 92  | CGL2_11346092 | Probable purine-cytosine permease                          | 477 | 85875..87305               | 14_GENE_68 |
| 11346 | 93  | CGL2_11346093 | NADH dehydrogenase (EC 1.6.99.3)                           | 452 | 87301..88656               | 14_GENE_67 |
| 11346 | 94  | CGL2_11346094 | Putative amino acid permease                               | 651 | complement(88659..90611)   | 14_GENE_66 |
| 11346 | 95  | CGL2_11346095 | Hypothetical protein                                       | 519 | complement(90800..92356)   | 14_GENE_65 |
| 11346 | 96  | CGL2_11346096 | Hypothetical protein                                       | 175 | complement(92416..92940)   | 14_GENE_64 |
| 11346 | 97  | CGL2_11346097 | Hypothetical protein                                       | 54  | complement(93068..93229)   | 14_GENE_63 |
| 11346 | 98  | CGL2_11346098 | Hypothetical protein                                       | 98  | complement(93300..93593)   | 14_GENE_62 |
| 11346 | 99  | CGL2_11346099 | Hypothetical protein                                       | 332 | complement(93714..94709)   | 14_GENE_61 |
| 11346 | 100 | CGL2_11346100 | Putative amino acid permease                               | 476 | complement(94788..96215)   | 14_GENE_60 |
| 11346 | 101 | CGL2_11346101 | Conserved protein of unknown function                      | 176 | complement(96288..96815)   | 14_GENE_59 |
| 11346 | 102 | CGL2_11346102 | Putative acetyltransferase                                 | 164 | complement(96867..97358)   | 14_GENE_58 |
| 11346 | 103 | CGL2_11346103 | Deoxyribonuclease, TatD family                             | 263 | complement(97361..98149)   | 14_GENE_57 |
| 11346 | 104 | CGL2_11346104 | Methionyl-tRNA synthetase (EC 6.1.1.10)                    | 673 | complement(98157..100175)  | 14_GENE_56 |
| 11346 | 105 | CGL2_11346105 | Conserved protein of unknown function                      | 240 | complement(100214..100933) | 14_GENE_55 |
| 11346 | 106 | CGL2_11346106 | DNA polymerase III (EC 2.7.7.7)                            | 343 | complement(101001..102029) | 14_GENE_54 |
| 11346 | 107 | CGL2_11346107 | Thymidylate kinase (EC 2.7.4.9)                            | 220 | complement(102029..102688) | 14_GENE_53 |
| 11346 | 108 | CGL2_11346108 | Hypothetical protein                                       | 43  | complement(102857..102985) | 14_GENE_52 |
| 11346 | 109 | CGL2_11346109 | Putative ferric uptake regulator, Fur family               | 155 | 103267..103731             | 14_GENE_51 |
| 11346 | 110 | CGL2_11346110 | Cytochrome c peroxidase (EC 1.11.1.5)                      | 338 | 103757..104770             | 14_GENE_50 |
| 11346 | 111 | CGL2_11346111 | Putative alkyl hydroperoxide reductase                     | 200 | 104922..105521             | 14_GENE_49 |
| 11346 | 112 | CGL2_11346112 | Putative acireductone dioxygenase                          | 186 | 105580..106137             | 14_GENE_48 |
| 11346 | 113 | CGL2_11346113 | Ribulose-bisphosphate carboxylase (EC 4.1.1.39)            | 389 | 106140..107306             | 14_GENE_47 |
| 11346 | 114 | CGL2_11346114 | Putative hydrolase, haloacid dehalogenase-like family      | 216 | 107306..107953             | 14_GENE_46 |
| 11346 | 115 | CGL2_11346115 | Putative aldolase class II                                 | 200 | 107949..108548             | 14_GENE_45 |
| 11346 | 116 | CGL2_11346116 | Transcriptional regulator, MarR family                     | 159 | 108707..109183             | 14_GENE_44 |
| 11346 | 117 | CGL2_11346117 | Conserved hypothetical protein                             | 150 | 109215..109664             | 14_GENE_43 |
| 11346 | 118 | CGL2_11346118 | Conserved protein of unknown function                      | 76  | 109766..109993             | 14_GENE_42 |
| 11346 | 119 | CGL2_11346119 | Putative silent information regulator protein, Sir2 family | 279 | complement(110082..110918) | 14_GENE_41 |
| 11346 | 120 | CGL2_11346120 | Hypothetical protein                                       | 125 | 111491..111865             | 14_GENE_39 |
| 11346 | 121 | CGL2_11346121 | Putative transcriptional regulator, ArsR family            | 117 | 112055..112405             | 14_GENE_38 |
| 11346 | 122 | CGL2_11346122 | Glyoxalase family protein                                  | 146 | 112405..112842             | 14_GENE_37 |
| 11346 | 123 | CGL2_11346123 | Hypothetical protein                                       | 285 | complement(112871..113725) | 14_GENE_36 |
| 11346 | 124 | CGL2_11346124 | Conserved protein of unknown function                      | 222 | 113943..114608             | 14_GENE_35 |
| 11346 | 125 | CGL2_11346125 | Glucosamine-1-phosphate n-acetyltransferase] (EC 2         | 469 | 114601..116007             | 14_GENE_34 |

|           |      |                |                                                        |      |                            |            |
|-----------|------|----------------|--------------------------------------------------------|------|----------------------------|------------|
| 11346     | 126  | CGL2_11346126  | Glucosamine--fructose-6-phosphate aminotransferas      | 605  | 116012..117826             | 14_GENE_33 |
| 11346     | 127  | CGL2_11346127  | Protein of unknown function                            | 439  | 117865..119181             | 14_GENE_32 |
| 11346     | 128  | CGL2_11346128  | Putative ATP-dependent DNA helicase, UvrD/REP fam      | 746  | 119181..121418             | 14_GENE_31 |
| 11346     | 129  | CGL2_11346129  | Glutamyl-tRNA(Gln) amidotransferase, C subunit         | 99   | 121565..121861             | 14_GENE_30 |
| 11346     | 130  | CGL2_11346130  | Aspartate 1-decarboxylase (EC 4.1.1.11)                | 121  | 121869..122231             | 14_GENE_29 |
| 11346     | 131  | CGL2_11346131  | Glutamyl-tRNA(Gln) amidotransferase A subunit / An     | 492  | 122231..123706             | 14_GENE_28 |
| 11346     | 132  | CGL2_11346132  | Glutamyl-tRNA(Gln) amidotransferase B subunit          | 490  | 123706..125175             | 14_GENE_27 |
| 11346     | 133  | CGL2_11346133  | Protein of unknown function                            | 227  | 125175..125855             | 14_GENE_26 |
| 11346     | 134  | CGL2_11346134  | Probable Cytochrome c, NapC/NirT family                | 166  | 125871..126368             | 14_GENE_25 |
| 11346     | 135  | CGL2_11346135  | Enolase (EC 4.2.1.11)                                  | 427  | 126381..127661             | 14_GENE_24 |
| 11346     | 136  | CGL2_11346136  | Hypothetical protein                                   | 113  | 127672..128010             | 14_GENE_23 |
| 11346     | 137  | CGL2_11346137  | Protein of unknown function                            | 146  | complement(128038..128475) | 14_GENE_22 |
| 11346     | 138  | CGL2_11346138  | Probable cytochrome c, class I                         | 185  | 129079..129633             | 14_GENE_20 |
| 11346     | 139  | CGL2_11346139  | Putative sigma54 specific transcriptional regulator, F | 463  | 130191..131579             | 14_GENE_19 |
| 11346     | 140  | CGL2_11346140  | Hypothetical protein                                   | 168  | 132055..132558             | 14_GENE_18 |
| 11346     | 141  | CGL2_11346141  | Hypothetical protein                                   | 121  | 132641..133003             | 14_GENE_17 |
| 11346     | 142  | CGL2_11346142  | Putative peptidase, C39 family                         | 279  | 133087..133923             | 14_GENE_16 |
| 11346     | 143  | CGL2_11346143  | Hypothetical protein                                   | 246  | 133957..134694             | 14_GENE_15 |
| 11346     | 144  | CGL2_11346144  | Conserved hypothetical protein                         | 375  | 135338..136462             | 14_GENE_14 |
| 11346     | 145  | CGL2_11346145  | Putative Outer membrane protein, OmpAfamily            | 521  | 136474..138036             | 14_GENE_13 |
| 11346     | 146  | CGL2_11346146  | Protein of unknown function                            | 292  | complement(138057..138932) | 14_GENE_12 |
| 11346     | 147  | CGL2_11346147  | Flavin oxidoreductase/NADH oxidase (EC 1.6.99.1)       | 367  | complement(139106..140206) | 14_GENE_11 |
| 11346     | 148  | CGL2_11346148  | Putative transcriptional regulator, BadM/Rrf2 family   | 159  | complement(140289..140765) | 14_GENE_10 |
| 11346     | 149  | CGL2_11346149  | Phosphoglucosamine mutase (EC 5.4.2.10)                | 457  | 140920..142290             | 14_GENE_8  |
| 11346     | 150  | CGL2_11346150  | Competence protein (ComEC)                             | 482  | 142566..144011             | 14_GENE_7  |
| 11346     | 151  | CGL2_11346151  | Putative DNA methylase N-4/N-6                         | 453  | complement(143987..145345) | 14_GENE_6  |
| 11346     | 152  | CGL2_11346152  | Hypothetical protein                                   | 46   | 145522..145659             | 14_GENE_5  |
| 11346     | 153  | CGL2_11346153  | Protein of unknown function                            | 207  | complement(145672..146292) | 14_GENE_4  |
| 11346     | 154  | CGL2_11346154  | NADH dehydrogenase (Quinone) (EC 1.6.99.5)             | 634  | 146431..148332             | 14_GENE_3  |
| 11346     | 154a | CGL2_11346154a | transposase                                            | 446  | 148469..149806             |            |
| 11346tRNA |      | CGL2_11346R003 | TRNA Lys CTT                                           |      | 150149..150224             |            |
| 11346     | 155  | CGL2_11346155  | Diguanylate cyclase with GAF sensor                    | 322  | 150471..151436             | 14_GENE_2  |
| 11346     | 156  | CGL2_11346156  | Conserved hypothetical protein                         | 262  | 151662..152447             | 51_GENE_7  |
| 11346     | 157  | CGL2_11346157  | Protein of unknown function                            | 409  | 152512..153738             | 51_GENE_8  |
| 11346     | 158  | CGL2_11346158  | Secretion protein (HlyD)                               | 385  | complement(153802..154956) | 51_GENE_9  |
| 11346     | 159  | CGL2_11346159  | Hydrophobe/amphiphile efflux family protein            | 1042 | complement(155012..158137) | 51_GENE_10 |
| 11346     | 160  | CGL2_11346160  | RND efflux system, outer membrane lipoprotein (Noc     | 500  | complement(158198..159697) | 51_GENE_11 |
| 11346     | 161  | CGL2_11346161  | Hypothetical protein                                   | 63   | complement(159841..160029) | 51_GENE_12 |
| 11346     | 162  | CGL2_11346162  | Putative transcriptional regulator, MarR family        | 181  | 160165..160707             | 51_GENE_13 |
| 11346     | 163  | CGL2_11346163  | Cinnamyl-alcohol dehydrogenase (EC 1.1.1.195)          | 334  | 160786..161787             | 51_GENE_14 |
| 11346     | 164  | CGL2_11346164  | Putative exodeoxyribonuclease V, gamma subunit         | 1095 | 161852..165136             | 51_GENE_15 |

|       |      |                |                                                       |      |                            |             |
|-------|------|----------------|-------------------------------------------------------|------|----------------------------|-------------|
| 11346 | 165  | CGL2_11346165  | Putative exodeoxyribonuclease V, beta subunit         | 1095 | 165136..168420             | 51_GENE_16  |
| 11346 | 166  | CGL2_11346166  | Exodeoxyribonuclease V, alpha subunit (EC 3.1.11.5)   | 575  | 168420..170144             | 51_GENE_17  |
| 11346 | 167  | CGL2_11346167  | Conserved protein of unknown function                 | 364  | complement(170172..171263) | 51_GENE_18  |
| 11346 | 168  | CGL2_11346168  | Putative two component transcriptional regulator, wii | 253  | complement(171263..172021) | 51_GENE_19  |
| 11346 | 169  | CGL2_11346169  | Protein of unknown function                           | 144  | complement(172379..172810) | 51_GENE_20  |
| 11346 | 170  | CGL2_11346170  | Probable TonB-like protein                            | 216  | complement(172824..173471) | 51_GENE_21  |
| 11346 | 171  | CGL2_11346171  | Putative biopolymer transport protein                 | 139  | complement(173471..173887) | 51_GENE_22  |
| 11346 | 172  | CGL2_11346172  | Putative biopolymer transport protein                 | 234  | complement(173954..174655) | 51_GENE_23  |
| 11346 | 173  | CGL2_11346173  | Probable TonB-dependent receptor                      | 974  | complement(174823..177744) | 51_GENE_24  |
| 11346 | 174  | CGL2_11346174  | Conserved protein of unknown function                 | 238  | 178026..178739             | 51_GENE_26  |
| 11346 | 175  | CGL2_11346175  | Protein of unknown function                           | 147  | 179281..179721             | 51_GENE_27  |
| 11346 | 175a | CGL2_11346175a | Conserved hypothetical protein                        | 213  | complement(179805..180443) |             |
| 11346 | 176  | CGL2_11346176  | Transposase                                           | 416  | complement(180436..181683) |             |
| 11346 | 177  | CGL2_11346177  | Hypothetical protein                                  | 2132 | complement(181919..188314) |             |
| 11346 | 178  | CGL2_11346178  | Putative Type I Restriction modification system, S su | 360  | complement(188806..189885) |             |
| 11346 | 179  | CGL2_11346179  | Putative Type I Restriction modification system, M su | 549  | complement(189885..191531) |             |
| 11346 | 180  | CGL2_11346180  | Putative DEAD/DEAH box helicase                       | 756  | complement(191575..193842) |             |
| 11346 | 181  | CGL2_11346181  | Conserved hypothetical protein                        | 317  | complement(193870..194820) |             |
| 11346 | 182  | CGL2_11346182  | Hypothetical protein                                  | 144  | complement(194866..195297) |             |
| 11346 | 183  | CGL2_11346183  | Hypothetical protein                                  | 164  | complement(195704..196195) | 265_GENE_7  |
| 11346 | 184  | CGL2_11346184  | Probable XRE family transcriptional regulator         | 175  | complement(196188..196712) | 265_GENE_6  |
| 11346 | 185  | CGL2_11346185  | Conserved hypothetical protein                        | 119  | complement(196728..197084) |             |
| 11346 | 186  | CGL2_11346186  | Putative mobilization protein TraA                    | 899  | complement(197283..199979) | 219_GENE_18 |
| 11346 | 8    | CGL2_11346008  | Conserved protein of unknown function                 | 93   | complement(7652..7930)     | 232_GENE_8  |
| 11346 | 9    | CGL2_11346009  | Conserved protein of unknown function                 | 98   | complement(7937..8230)     | 232_GENE_9  |
| 9314  | 5    | CGL2_09314005  | Putative phage integrase                              | 330  | complement(2687..3676)     | 219_GENE_5  |
| 9314  | 4    | CGL2_09314004  | Conserved protein of unknown function                 | 73   | complement(2385..2603)     | 219_GENE_4  |
| 9314  | 3    | CGL2_09314003  | Probable plasmid stabilization system protein         | 100  | complement(2083..2382)     | 219_GENE_3  |
| 9314  | 2    | CGL2_09314002  | Hypothetical protein                                  | 145  | complement(1424..1858)     |             |
| 9314  | 1    | CGL2_09314001  | Hypothetical protein                                  | 226  | complement(736..1413)      |             |
| 11185 | 11   | CGL2_11185011  | Protein of unknown function                           | 240  | 8393..9112                 |             |
| 11346 | 187  | CGL2_11346187  | Hypothetical protein                                  | 110  | complement(199930..200259) | 219_GENE_17 |
| 11346 | 188  | CGL2_11346188  | mobilization protein, MobE                            | 210  | complement(200263..200892) | 219_GENE_16 |
| 11346 | 189  | CGL2_11346189  | mobilization protein, MobD                            | 132  | complement(200892..201287) | 219_GENE_15 |
| 11346 | 190  | CGL2_11346190  | Conserved hypothetical protein                        | 111  | complement(201218..201550) | 219_GENE_14 |
| 11346 | 191  | CGL2_11346191  | Protein of unknown function                           | 163  | complement(201578..202066) | 219_GENE_13 |
| 11346 | 192  | CGL2_11346192  | Hypothetical protein                                  | 138  | complement(202318..202731) | 219_GENE_12 |
| 11346 | 193  | CGL2_11346193  | Hypothetical protein                                  | 430  | complement(202860..204149) | 219_GENE_10 |
| 11346 | 194  | CGL2_11346194  | Hypothetical protein                                  | 62   | complement(204154..204339) | 219_GENE_9  |
| 11346 | 195  | CGL2_11346195  | Hypothetical protein                                  | 236  | 204449..205156             | 219_GENE_8  |
| 11346 | 196  | CGL2_11346196  | Integrase                                             | 388  | 205199..206362             | 219_GENE_7  |

|           |     |                     |                                                               |                     |                            |            |
|-----------|-----|---------------------|---------------------------------------------------------------|---------------------|----------------------------|------------|
| 11346tRNA |     | CGL2_11346R004      | TRNA Gly GCC                                                  |                     | complement(206302..206376) |            |
| 11346     | 197 | CGL2_11346197       | Probable outer membrane lipoprotein                           | 173                 | complement(206523..207041) | 219_GENE_6 |
|           |     | Strain variant path | Strain variant path                                           | Strain variant path |                            |            |
| 10850     | 18  | CGL2_10850018       | Putative pirin protein                                        | 301                 | complement(19392..20294)   | 98_GENE_19 |
| 10850     | 17  | CGL2_10850017       | Putative potassium channel protein                            | 421                 | complement(17862..19124)   | 98_GENE_18 |
| 10850     | 16  | CGL2_10850016       | Deoxyribodipyrimidine photolyase (EC 4.1.99.3)                | 534                 | 16247..17848               | 98_GENE_17 |
| 10850     | 15  | CGL2_10850015       | Protein of unknown function                                   | 276                 | complement(15086..15913)   | 98_GENE_16 |
| 10850     | 14  | CGL2_10850014       | Putative secretion protein (HlyD)                             | 299                 | 14139..15035               | 98_GENE_15 |
| 10850     | 13  | CGL2_10850013       | Conserved hypothetical protein                                | 68                  | 13936..14139               | 98_GENE_14 |
| 10850     | 12  | CGL2_10850012       | Putative fusaric acid resistance protein                      | 682                 | 11891..13936               | 98_GENE_13 |
| 10850     | 11  | CGL2_10850011       | Protein of unknown function                                   | 240                 | 10986..11705               | 98_GENE_12 |
| 10850     | 10  | CGL2_10850010       | Protein of unknown function                                   | 386                 | 9698..10855                | 98_GENE_11 |
| 10850     | 9   | CGL2_10850009       | Protein of unknown function                                   | 214                 | 9028..9669                 | 98_GENE_10 |
| 10850     | 8   | CGL2_10850008       | a+/H+ antiporter                                              | 535                 | 7213..8817                 | 98_GENE_9  |
| 10850     | 7   | CGL2_10850007       | Putative transcriptional regulator, TetR family               | 219                 | 6352..7008                 | 98_GENE_8  |
| 10850     | 6   | CGL2_10850006       | Putative isochorismatase hydrolase                            | 188                 | complement(5681..6244)     | 98_GENE_7  |
| 10850     | 5   | CGL2_10850005       | Putative ammonia monooxygenase                                | 345                 | complement(4543..5577)     | 98_GENE_6  |
| 10850tRNA |     | CGL2_10850R001      | TRNA Asn GTT                                                  |                     | 4384..4459                 |            |
| 10850     | 4   | CGL2_10850004       | Conserved protein of unknown function                         | 235                 | 3574..4278                 | 98_GENE_4  |
| 10850     | 3   | CGL2_10850003       | Conserved protein of unknown function                         | 293                 | 2696..3574                 | 98_GENE_3  |
| 10850     | 2   | CGL2_10850002       | Dihydropteroate synthase (EC 2.5.1.15)                        | 283                 | 1843..2691                 | 98_GENE_2  |
| 10850     | 1   | CGL2_10850001       | Peptidase M41, FtsH (EC 3.6.4.6)                              | 592                 | 78..1853                   | 98_GENE_1  |
| 11247     | 23  | CGL2_11247023       | Hypoxanthine phosphoribosyl transferase (EC 2.4.2.1)          | 176                 | 24189..24716               | 76_GENE_1  |
| 11247     | 22  | CGL2_11247022       | TRNA(Ile)-lysine synthetase                                   | 504                 | 22702..24213               | 76_GENE_2  |
| 11247     | 21  | CGL2_11247021       | Riboflavin kinase / FAD synthase (RibC) (EC 2.7.7.2)          | 319                 | 21771..22727               | 76_GENE_3  |
| 11247     | 20  | CGL2_11247020       | Porphobilinogen synthase (EC 4.2.1.24)                        | 326                 | 20743..21720               | 76_GENE_4  |
| 11247     | 19  | CGL2_11247019       | Uroporphyrin-III C-methyltransferase / synthase (EC 2.3.1.37) | 513                 | 19166..20704               | 76_GENE_5  |
| 11247     | 18  | CGL2_11247018       | Porphobilinogen deaminase (EC 2.5.1.61)                       | 314                 | 17662..18603               | 76_GENE_6  |
| 11247     | 17  | CGL2_11247017       | Glutamyl-tRNA reductase                                       | 452                 | 16304..17659               | 76_GENE_7  |
| 11247     | 16  | CGL2_11247016       | Putative Cytochrome c assembly protein                        | 269                 | 15425..16231               | 76_GENE_8  |
| 11247     | 15  | CGL2_11247015       | Protein of unknown function                                   | 515                 | complement(13749..15293)   | 76_GENE_9  |
| 11247     | 14  | CGL2_11247014       | Lysine 2,3-aminomutase                                        | 383                 | complement(12597..13745)   | 76_GENE_10 |
| 11247     | 13  | CGL2_11247013       | Nitroreductase                                                | 249                 | complement(11824..12570)   | 76_GENE_11 |
| 11247     | 12  | CGL2_11247012       | Putative 2-deoxycytidine 5-triphosphate deaminase             | 366                 | complement(10736..11833)   | 76_GENE_12 |
| 11247     | 11  | CGL2_11247011       | Putative AAA-family ATPase                                    | 575                 | complement(8846..10570)    | 76_GENE_13 |
| 11247     | 10  | CGL2_11247010       | Putative proteasome component                                 | 511                 | complement(7314..8846)     | 76_GENE_14 |
| 11247     | 9   | CGL2_11247009       | Protein of unknown function                                   | 64                  | complement(7103..7294)     | 76_GENE_15 |
| 11247     | 8   | CGL2_11247008       | Putative 20S proteasome beta-subunit                          | 265                 | complement(6301..7095)     | 76_GENE_16 |
| 11247     | 7   | CGL2_11247007       | Probable 20S proteasome alpha-subunit                         | 251                 | complement(5553..6305)     | 76_GENE_17 |
| 11247     | 6   | CGL2_11247006       | Conserved protein of unknown function                         | 502                 | complement(4120..5625)     | 76_GENE_18 |
| 11247     | 5   | CGL2_11247005       | Dihydroorotate dehydrogenase (EC 1.3.3.1)                     | 368                 | 3014..4117                 | 76_GENE_19 |

|       |    |               |                                                        |     |                          |             |
|-------|----|---------------|--------------------------------------------------------|-----|--------------------------|-------------|
| 11247 | 4  | CGL2_11247004 | Homoserine kinase (EC 2.7.1.39)                        | 331 | 2041..3033               | 76_GENE_20  |
| 11247 | 3  | CGL2_11247003 | Probable ferredoxin                                    | 112 | 1710..2045               | 76_GENE_21  |
| 11247 | 1  | CGL2_11247001 | Conserved hypothetical protein                         | 239 | 791..1507                | 76_GENE_22  |
| 11077 | 1  | CGL2_11077001 | Hypothetical protein                                   | 37  | 42..152                  |             |
| 11077 | 2  | CGL2_11077002 | Hypothetical protein                                   | 66  | 215..412                 | 25_GENE_1   |
| 11077 | 3  | CGL2_11077003 | Probable cytochrome C oxidase mono-heme subunit        | 176 | 477..1004                | 25_GENE_2   |
| 11077 | 4  | CGL2_11077004 | Protein of unknown function                            | 110 | 1117..1446               | 25_GENE_3   |
| 11077 | 5  | CGL2_11077005 | Hypothetical protein                                   | 68  | 1716..1919               | 25_GENE_4   |
| 11077 | 6  | CGL2_11077006 | Protein of unknown function                            | 143 | 1934..2362               | 25_GENE_5   |
| 11077 | 7  | CGL2_11077007 | Protein of unknown function                            | 68  | 2402..2605               | 25_GENE_6   |
| 11077 | 8  | CGL2_11077008 | Protein of unknown function                            | 155 | 2628..3092               | 25_GENE_7   |
| 11077 | 9  | CGL2_11077009 | Probable cytochrome-c oxidase                          | 185 | 3092..3646               | 25_GENE_8   |
| 11077 | 10 | CGL2_11077010 | Conserved protein of unknown function                  | 362 | 3646..4731               | 25_GENE_9   |
| 11077 | 11 | CGL2_11077011 | Probable cytochrome C oxidase                          | 188 | 4770..5333               | 25_GENE_10  |
| 11077 | 12 | CGL2_11077012 | Hypothetical protein                                   | 89  | 5338..5604               | 25_GENE_11  |
| 11077 | 13 | CGL2_11077013 | Probable iron-sulfur protein                           | 442 | 5692..7017               | 25_GENE_12  |
| 11077 | 14 | CGL2_11077014 | Protein of unknown function                            | 155 | 7096..7560               | 25_GENE_13  |
| 11077 | 15 | CGL2_11077015 | Hypothetical protein                                   | 108 | 7544..7867               | 25_GENE_13a |
| 11077 | 16 | CGL2_11077016 | Conserved hypothetical protein                         | 202 | 7887..8492               | 25_GENE_15  |
| 11077 | 17 | CGL2_11077017 | Putative ADP-ribose pyrophosphatase                    | 198 | 8482..9075               | 25_GENE_16  |
| 11077 | 18 | CGL2_11077018 | Probable ferredoxin                                    | 63  | 9106..9294               | 25_GENE_17  |
| 11077 | 19 | CGL2_11077019 | Sigma54 specific transcriptional regulator, Fis family | 473 | 9301..10719              | 25_GENE_18  |
| 11077 | 20 | CGL2_11077020 | Anthranilate synthase component I (EC 4.1.3.27)        | 501 | 10719..12221             | 25_GENE_19  |
| 11077 | 21 | CGL2_11077021 | Anthranilate synthase component II (EC 4.1.3.27)       | 198 | 12212..12805             | 25_GENE_20  |
| 11077 | 22 | CGL2_11077022 | Anthranilate phosphoribosyltransferase (EC 2.4.2.18)   | 341 | 12805..13827             | 25_GENE_21  |
| 11077 | 23 | CGL2_11077023 | Indole-3-glycerol phosphate synthase (EC 4.1.1.48)     | 274 | 13797..14618             | 25_GENE_22  |
| 11077 | 24 | CGL2_11077024 | Phosphoribosylanthranilate isomerase (EC 5.3.1.24)     | 212 | 14611..15246             | 25_GENE_23  |
| 11077 | 25 | CGL2_11077025 | Tryptophan synthase, beta subunit (EC 4.2.1.20)        | 412 | 15236..16471             | 25_GENE_24  |
| 11077 | 26 | CGL2_11077026 | Tryptophan synthase, alpha chain (EC 4.2.1.20)         | 264 | 16471..17262             | 25_GENE_25  |
| 11077 | 27 | CGL2_11077027 | Acetyl-CoA carboxylase carboxyltransferase, beta su    | 304 | 17318..18229             | 25_GENE_26  |
| 11077 | 28 | CGL2_11077028 | Folypolyglutamate synthase (EC 6.3.2.17)               | 444 | 18233..19564             | 25_GENE_27  |
| 11077 | 29 | CGL2_11077029 | Probable organic solvent tolerance protein (OstA)      | 767 | 19564..21864             | 25_GENE_28  |
| 11077 | 30 | CGL2_11077030 | Conserved protein of unknown function                  | 266 | complement(21891..22688) | 25_GENE_29  |
| 11077 | 31 | CGL2_11077031 | NAD(+) kinase (EC 2.7.1.23)                            | 305 | complement(22753..23667) | 25_GENE_30  |
| 11077 | 32 | CGL2_11077032 | Glutamate synthase, small subunit (EC 1.4.1.13)        | 613 | 24161..25999             | 25_GENE_31  |
| 11077 | 33 | CGL2_11077033 | Putative rieske iron-sulfur family protein             | 206 | 25999..26616             | 25_GENE_32  |
| 11077 | 34 | CGL2_11077034 | Putative cytochrome b/b6, N-terminal                   | 253 | 26795..27553             | 25_GENE_33  |
| 11077 | 35 | CGL2_11077035 | Probable cytochrome b/b6, C-terminal                   | 276 | 27611..28438             | 25_GENE_34  |
| 11077 | 36 | CGL2_11077036 | Protein of unknown function                            | 72  | 28540..28755             | 25_GENE_35  |
| 11077 | 37 | CGL2_11077037 | Probable cytochrome c, class I                         | 321 | 28755..29717             | 25_GENE_36  |

|       |    |               |                                                          |      |                          |             |
|-------|----|---------------|----------------------------------------------------------|------|--------------------------|-------------|
| 11077 | 38 | CGL2_11077038 | Daunorubicin resistance ABC transporter ATP-binding      | 327  | 29802..30782             | 25_GENE_37  |
| 11077 | 39 | CGL2_11077039 | Putative ABC-2 type transporter                          | 273  | 30782..31600             | 25_GENE_38  |
| 11077 | 40 | CGL2_11077040 | Conserved protein of unknown function                    | 164  | 31704..32195             | 25_GENE_39  |
| 11077 | 40 | CGL2_11077040 | Conserved protein of unknown function                    | 164  | 31704..32195             | 25_GENE_39  |
| 11077 | 42 | CGL2_11077042 | Signal peptide peptidase, SppA                           | 349  | 32210..33256             | 25_GENE_40  |
| 11077 | 43 | CGL2_11077043 | Protein of unknown function                              | 119  | complement(33223..33579) | 25_GENE_41  |
| 11077 | 44 | CGL2_11077044 | Putative hydroxypyruvate reductase/glycerate kinase      | 431  | complement(33579..34871) | 25_GENE_42  |
| 11077 | 45 | CGL2_11077045 | Hypothetical protein                                     | 87   | complement(34879..35139) | 25_GENE_43  |
| 11077 | 46 | CGL2_11077046 | Conserved protein of unknown function                    | 359  | 35184..36260             | 25_GENE_44  |
| 11077 | 47 | CGL2_11077047 | Protein of unknown function                              | 115  | complement(36277..36621) | 25_GENE_45  |
| 11079 | 1  | CGL2_11079001 | Protein of unknown function                              | 220  | complement(739..1398)    | 25_GENE_46  |
| 11079 | 2  | CGL2_11079002 | Protein of unknown function                              | 115  | complement(1478..1822)   | 25_GENE_47  |
| 11079 | 3  | CGL2_11079003 | Conserved hypothetical protein                           | 168  | 1908..2411               | 25_GENE_48  |
| 11079 | 4  | CGL2_11079004 | Putative major facilitator superfamily transporter       | 404  | 2386..3597               | 25_GENE_49  |
| 11080 | 1  | CGL2_11080001 | Putative CBS domain containing membrane protein          | 152  | 1065..1520               | 25_GENE_50  |
| 11080 | 2  | CGL2_11080002 | Conserved protein of unknown function                    | 175  | 1510..2034               | 25_GENE_51  |
| 11080 | 3  | CGL2_11080003 | Putative histidine triad (HIT) protein                   | 179  | 2048..2584               | 25_GENE_52  |
| 11080 | 4  | CGL2_11080004 | Protein of unknown function                              | 231  | 2602..3294               | 25_GENE_53  |
| 11080 | 5  | CGL2_11080005 | Uracil phosphoribosyltransferase (EC 2.4.2.9)            | 199  | 3354..3950               | 25_GENE_54  |
| 11080 | 6  | CGL2_11080006 | Aspartate carbamoyltransferase (EC 2.1.3.2)              | 308  | 3950..4873               | 25_GENE_55  |
| 11080 | 7  | CGL2_11080007 | Dihydroorotase (EC 3.5.2.3)                              | 438  | 4906..6219               | 25_GENE_56  |
| 11080 | 8  | CGL2_11080008 | Carbamoyl-phosphate synthase, small subunit (EC 6.3.1.1) | 365  | 6219..7313               | 25_GENE_57  |
| 11080 | 9  | CGL2_11080009 | Putative radical SAM family protein                      | 332  | 7306..8301               | 25_GENE_58  |
| 11080 | 10 | CGL2_11080010 | Carbamoyl-phosphate synthase, large subunit (EC 6.3.1.1) | 1080 | 8297..11536              | 25_GENE_59  |
| 11080 | 11 | CGL2_11080011 | Putative transcription elongation factor GreA            | 160  | 11616..12095             | 25_GENE_60  |
| 11080 | 12 | CGL2_11080012 | Hypothetical protein                                     | 41   | 12133..12255             | 25_GENE_61  |
| 11080 | 13 | CGL2_11080013 | Hypothetical protein                                     | 25   | 12437..12511             |             |
| 11390 | 1  | CGL2_11390001 | Putative lytic transglycosylase                          | 185  | 163..717                 | 1108_GENE_3 |
| 11390 | 2  | CGL2_11390002 | Hypothetical protein                                     | 298  | 840..1733                | 483_GENE_1  |
| 11390 | 3  | CGL2_11390003 | Dihydrolipoamide dehydrogenase (EC 1.8.1.4)              | 461  | complement(1764..3146)   | 483_GENE_2  |
| 11390 | 4  | CGL2_11390004 | Putative diguanylate cyclase/phosphodiesterase with      | 1157 | complement(3277..6747)   | 483_GENE_3  |
| 11390 | 5  | CGL2_11390005 | Glutamine synthetase, type I (EC 6.3.1.2)                | 470  | 7377..8786               | 23_GENE_3   |
| 11390 | 6  | CGL2_11390006 | Aspartyl-tRNA synthetase (EC 6.1.1.12)                   | 584  | complement(8907..10658)  | 23_GENE_4   |
| 11390 | 7  | CGL2_11390007 | Pseudouridine synthase, Rsu                              | 583  | complement(10673..12421) | 23_GENE_4a  |
| 11390 | 8  | CGL2_11390008 | GMP synthase [glutamine-hydrolyzing] (EC 6.3.5.2)        | 516  | complement(12427..13974) | 23_GENE_6   |
| 11390 | 9  | CGL2_11390009 | Inosine-5'-monophosphate dehydrogenase (EC 1.1.1.1)      | 489  | complement(14017..15483) | 23_GENE_7   |
| 11390 | 10 | CGL2_11390010 | Conserved protein of unknown function                    | 173  | complement(15583..16101) | 23_GENE_8   |
| 11390 | 11 | CGL2_11390011 | Probable AAA ATPase superfamily                          | 300  | complement(16097..16996) | 23_GENE_9   |
| 11390 | 12 | CGL2_11390012 | Putative Lon family ATP-dependent protease               | 218  | complement(17020..17673) | 23_GENE_10  |
| 11390 | 13 | CGL2_11390013 | Protein of unknown function                              | 133  | complement(17703..18101) | 23_GENE_11  |
| 11390 | 14 | CGL2_11390014 | Probable N-acetyltransferase family protein              | 167  | 18242..18742             | 23_GENE_12  |

|       |    |               |                                                                    |     |                          |            |
|-------|----|---------------|--------------------------------------------------------------------|-----|--------------------------|------------|
| 11390 | 15 | CGL2_11390015 | DNA ligase (EC 6.5.1.1)                                            | 603 | complement(18784..20592) | 23_GENE_13 |
| 11390 | 16 | CGL2_11390016 | Hypothetical protein                                               | 155 | 20772..21236             | 23_GENE_14 |
| 11390 | 17 | CGL2_11390017 | Protein of unknown function                                        | 179 | complement(21286..21822) | 23_GENE_15 |
| 11390 | 18 | CGL2_11390018 | Apolipoprotein N-acyltransferase                                   | 491 | 22155..23627             | 23_GENE_16 |
| 11390 | 19 | CGL2_11390019 | Peptide chain release factor 2                                     | 370 | 23667..24776             | 23_GENE_17 |
| 11390 | 20 | CGL2_11390020 | Putative heat shock protein (Hsp20)                                | 147 | 24833..25273             | 23_GENE_18 |
| 11390 | 21 | CGL2_11390021 | ATP-dependent protease La (EC 3.4.21.53)                           | 813 | 25269..27707             | 23_GENE_19 |
| 11390 | 22 | CGL2_11390022 | Endonuclease III/Nth                                               | 241 | 27652..28374             | 23_GENE_20 |
| 11390 | 23 | CGL2_11390023 | Conserved hypothetical protein                                     | 69  | 28518..28724             | 23_GENE_21 |
| 11390 | 24 | CGL2_11390024 | Aldo/keto reductase (EC 1.1.1.65)                                  | 335 | complement(28761..29765) | 23_GENE_22 |
| 11390 | 25 | CGL2_11390025 | Putative transcriptional regulator, AraC family                    | 315 | 29953..30897             | 23_GENE_23 |
| 11390 | 26 | CGL2_11390026 | Putative glycoside hydrolase, family 15                            | 684 | complement(30969..33020) | 23_GENE_24 |
| 11390 | 28 | CGL2_11390028 | Histidyl-tRNA synthetase (EC 6.1.1.21)                             | 437 | complement(33041..34351) | 23_GENE_25 |
| 11390 | 29 | CGL2_11390029 | Putative glycoside hydrolase, family 15                            | 659 | 34579..36555             | 23_GENE_27 |
| 11390 | 31 | CGL2_11390031 | GTP-binding protein (lepA)                                         | 609 | 37020..38846             | 23_GENE_28 |
| 11390 | 32 | CGL2_11390032 | Signal peptidase I (EC 3.4.21.89)                                  | 223 | 38891..39559             | 23_GENE_29 |
| 11390 | 33 | CGL2_11390033 | Carbohydrate kinase, PfkB                                          | 352 | 39587..40642             | 23_GENE_30 |
| 11390 | 34 | CGL2_11390034 | 3-deoxy-D-manno-octulosonate cytidyltransferase                    | 277 | 40642..41472             | 23_GENE_31 |
| 11390 | 35 | CGL2_11390035 | CTP synthase (EC 6.3.4.2)                                          | 545 | 41463..43097             | 23_GENE_32 |
| 11390 | 36 | CGL2_11390036 | 2-Dehydro-3-deoxyphosphooctonate aldolase (EC 4.1.3.1)             | 289 | 43097..43963             | 23_GENE_33 |
| 11390 | 37 | CGL2_11390037 | Sugar isomerase, KpsF/GutQ family (EC 5.3.1.13)                    | 332 | 43963..44958             | 23_GENE_34 |
| 11390 | 38 | CGL2_11390038 | Phosphatase kdsC                                                   | 182 | 44961..45506             | 23_GENE_35 |
| 11390 | 39 | CGL2_11390039 | CDP-diacylglycerol--glycerol-3-phosphate 3-phosphatidyltransferase | 189 | 45506..46072             | 23_GENE_36 |
| 11390 | 40 | CGL2_11390040 | Conserved hypothetical protein                                     | 206 | 46092..46709             | 23_GENE_37 |
| 11390 | 41 | CGL2_11390041 | Putative peptidase, M23B family                                    | 327 | 46855..47835             | 23_GENE_39 |
| 11390 | 42 | CGL2_11390042 | Putative periplasmic sensor signal transduction histidine kinase   | 506 | 47955..49472             | 23_GENE_40 |
| 11390 | 43 | CGL2_11390043 | Protein of unknown function                                        | 176 | 49472..49999             | 23_GENE_41 |
| 11390 | 44 | CGL2_11390044 | Putative two component, sigma54 specific, transcript               | 458 | 49999..51372             | 23_GENE_42 |
| 11390 | 45 | CGL2_11390045 | Conserved hypothetical protein                                     | 256 | complement(51412..52179) | 23_GENE_43 |
| 11390 | 46 | CGL2_11390046 | Hypothetical protein                                               | 359 | complement(52217..53293) | 23_GENE_44 |
| 11390 | 47 | CGL2_11390047 | Conserved protein of unknown function                              | 327 | complement(53375..54355) | 23_GENE_45 |
| 11390 | 48 | CGL2_11390048 | Protein of unknown function                                        | 102 | 54439..54744             | 23_GENE_46 |
| 11390 | 49 | CGL2_11390049 | Putative phosphoesterase, PAP2 family                              | 211 | 54832..55464             | 23_GENE_47 |
| 11390 | 50 | CGL2_11390050 | Putative radical SAM family protein                                | 379 | 55442..56578             | 23_GENE_48 |
| 11390 | 51 | CGL2_11390051 | Hypothetical protein                                               | 105 | 56548..56862             | 23_GENE_49 |
| 11390 | 52 | CGL2_11390052 | Putative catalytic LigB subunit of aromatic ring-opening lyase     | 264 | complement(56888..57679) | 23_GENE_50 |
| 11390 | 53 | CGL2_11390053 | Probable methyltransferase                                         | 388 | complement(57735..58898) | 23_GENE_51 |
| 11390 | 54 | CGL2_11390054 | Hypothetical protein                                               | 77  | complement(59023..59253) | 23_GENE_52 |
| 11390 | 55 | CGL2_11390055 | Putative cytochrome c oxidase, subunit I                           | 479 | 59439..60875             | 33_GENE_1  |
| 11390 | 56 | CGL2_11390056 | Twin-arginine translocation protein TatA/E                         | 73  | 61085..61303             | 33_GENE_4  |
| 11390 | 57 | CGL2_11390057 | Protein of unknown function                                        | 143 | complement(61360..61788) | 33_GENE_5  |

|       |     |               |                                                      |     |                            |             |
|-------|-----|---------------|------------------------------------------------------|-----|----------------------------|-------------|
| 11390 | 58  | CGL2_11390058 | Putative FAD dependent oxidoreductase                | 413 | complement(61788..63026)   | 33_GENE_6   |
| 11390 | 60  | CGL2_11390060 | Conserved hypothetical protein                       | 303 | complement(63128..64036)   | 33_GENE_7   |
| 11390 | 61  | CGL2_11390061 | NADH-flavin oxidoreductase/NADH oxidase              | 354 | complement(64103..65164)   | 33_GENE_8   |
| 11390 | 62  | CGL2_11390062 | Putative major facilitator superfamily transporter   | 496 | complement(65312..66799)   | 33_GENE_9   |
| 11390 | 63  | CGL2_11390063 | Hypothetical protein                                 | 85  | complement(66799..67053)   | 33_GENE_10  |
| 11390 | 64  | CGL2_11390064 | Protein of unknown function                          | 420 | complement(67237..68496)   | 33_GENE_11  |
| 11390 | 65  | CGL2_11390065 | Conserved hypothetical protein                       | 195 | 68836..69420               | 33_GENE_12  |
| 11390 | 66  | CGL2_11390066 | Protein of unknown function                          | 273 | 69648..70466               | 33_GENE_14  |
| 11390 | 67  | CGL2_11390067 | Probable PAS/PAC sensor protein                      | 218 | 70493..71146               | 33_GENE_15  |
| 11390 | 68  | CGL2_11390068 | Diguanylate cyclase                                  | 426 | 71221..72498               | 33_GENE_16  |
| 11390 | 70  | CGL2_11390070 | Hypothetical protein                                 | 258 | 72781..73554               | 33_GENE_17  |
| 11390 | 71  | CGL2_11390071 | Hypothetical protein                                 | 147 | complement(73698..74138)   | 33_GENE_18  |
| 11390 | 72  | CGL2_11390072 | Protein of unknown function                          | 345 | 74395..75429               | 33_GENE_19  |
| 11390 | 73  | CGL2_11390073 | Protein of unknown function                          | 493 | 75429..76907               | 33_GENE_20  |
| 11390 | 74  | CGL2_11390074 | Putative nodulation efficiency protein D             | 465 | 77161..78555               | 33_GENE_21  |
| 11390 | 75  | CGL2_11390075 | Band 7 family protein                                | 252 | 78555..79310               | 33_GENE_22  |
| 11390 | 76  | CGL2_11390076 | Putative carboxymuconolactone decarboxylase          | 146 | complement(79331..79768)   | 33_GENE_23  |
| 11390 | 77  | CGL2_11390077 | Protein of unknown function                          | 175 | complement(79768..80292)   | 33_GENE_24  |
| 11390 | 78  | CGL2_11390078 | Putative 3-hydroxyisobutyrate dehydrogenase          | 308 | 80505..81428               | 33_GENE_25  |
| 11390 | 79  | CGL2_11390079 | Probable hydrolase                                   | 277 | 81424..82254               | 33_GENE_26  |
| 11390 | 79  | CGL2_11390079 | Probable hydrolase                                   | 277 | 81424..82254               | 33_GENE_26  |
| 11390 | 81  | CGL2_11390081 | Protein of unknown function                          | 150 | complement(82423..82872)   | 33_GENE_27  |
| 11390 | 82  | CGL2_11390082 | Hypothetical protein                                 | 126 | complement(82968..83345)   | 33_GENE_28  |
| 11390 | 83  | CGL2_11390083 | Hypothetical protein                                 | 101 | 83398..83700               | 33_GENE_29  |
| 11390 | 84  | CGL2_11390084 | Putative two component, sigma54 specific, transcript | 489 | complement(83935..85401)   | 33_GENE_30  |
| 11390 | 85  | CGL2_11390085 | Multi-sensor signal transduction histidine kinase    | 660 | complement(85401..87380)   | 33_GENE_31  |
| 11390 | 86  | CGL2_11390086 | Conserved protein of unknown function                | 826 | complement(87548..90025)   | 33_GENE_32  |
| 11390 | 87  | CGL2_11390087 | NADH dehydrogenase (Quinone) (EC 1.6.99.5)           | 555 | complement(90025..91689)   | 33_GENE_33  |
| 11390 | 88  | CGL2_11390088 | Hypothetical protein                                 | 112 | 91972..92307               | 33_GENE_33a |
| 11390 | 89  | CGL2_11390089 | Dihydroxy-acid dehydratase (EC 4.2.1.9)              | 561 | 92432..94114               | 33_GENE_36  |
| 11390 | 90  | CGL2_11390090 | SUA5/yciO/yrdC family                                | 339 | complement(94206..95222)   | 33_GENE_37  |
| 11390 | 91  | CGL2_11390091 | Dihydroxy-acid dehydratase (EC 4.2.1.9)              | 558 | complement(95296..96969)   | 33_GENE_38  |
| 11390 | 92  | CGL2_11390092 | Conserved protein of unknown function                | 288 | complement(97064..97927)   | 33_GENE_39  |
| 11390 | 93  | CGL2_11390093 | Conserved protein of unknown function                | 823 | complement(98122..100590)  | 33_GENE_41  |
| 11390 | 94  | CGL2_11390094 | NADH dehydrogenase (Quinone) (EC 1.6.99.5)           | 553 | complement(100590..102248) | 33_GENE_42  |
| 11390 | 95  | CGL2_11390095 | Hypothetical protein                                 | 99  | 102681..102977             | 33_GENE_42a |
| 11390 | 96  | CGL2_11390096 | Probable PiIT protein-like                           | 105 | complement(103189..103503) | 33_GENE_44  |
| 11390 | 97  | CGL2_11390097 | Probable transcriptional regulator (AbrB)            | 88  | complement(103503..103766) | 33_GENE_45  |
| 11390 | 98  | CGL2_11390098 | Putative glycosyltransferase                         | 362 | 104057..105142             | 33_GENE_47  |
| 11390 | 98  | CGL2_11390098 | Putative glycosyltransferase                         | 362 | 104057..105142             | 33_GENE_47  |
| 11390 | 100 | CGL2_11390100 | Putative glycosyl transferase, group 1               | 401 | 105224..106426             | 33_GENE_48  |

|       |     |               |                                                               |     |                          |                        |
|-------|-----|---------------|---------------------------------------------------------------|-----|--------------------------|------------------------|
| 11390 | 101 | CGL2_11390101 | Undecaprenyl-phosphate galactose phosphotransferase           | 503 | 106419..107927           | 369_GENE_7             |
| 11390 | 102 | CGL2_11390102 | ABC transporter permease protein                              | 264 | 107969..108760           | 369_GENE_8             |
| 11390 | 103 | CGL2_11390103 | ABC transporter ATP-binding protein                           | 181 | 108773..109315           | 369_GENE_9             |
| 11390 | 104 | CGL2_11390104 | Putative glycosyltransferase                                  | 380 | 110083..111222           |                        |
| 9490  | 1   | CGL2_09490001 | Hypothetical protein                                          | 116 | 674..1021                | 318_GENE_1             |
| 9490  | 2   | CGL2_09490002 | Conserved hypothetical protein                                | 87  | 1283..1543               | 318_GENE_2             |
| 9490  | 3   | CGL2_09490003 | Probable CopG family protein                                  | 79  | 1536..1772               | 318_GENE_3             |
| 9490  | 3   | CGL2_09490003 | Probable CopG family protein                                  | 79  | 1536..1772               | 318_GENE_3             |
| 9490  | 5   | CGL2_09490005 | Probable transposase                                          | 220 | complement(2157..2816)   | 318_GENE_4             |
| 9490  | 5   | CGL2_09490005 | Probable transposase                                          | 220 | complement(2157..2816)   | 318_GENE_4             |
| 9921  | 4   | CGL2_09921004 | Methylated-DNA-[protein]-cysteine S-methyltransferase         | 164 | 3045..3536               | 318_GENE_5             |
| 9921  | 3   | CGL2_09921003 | Putative Ada DNA repair protein and transcriptional repressor | 475 | 1598..3022               | 318_GENE_6             |
| 9921  | 2   | CGL2_09921002 | Protein of unknown function                                   | 108 | 1087..1410               | 318_GENE_7             |
| 9921  | 1   | CGL2_09921001 | Hypothetical protein                                          | 142 | 412..837                 | 318_GENE_8             |
| 11284 | 2   | CGL2_11284002 | Putative transposase                                          | 182 | complement(598..1143)    | 318_GENE_9             |
| 11284 | 3   | CGL2_11284003 | Probable monooxygenase                                        | 420 | complement(1470..2729)   | 191_GENE_2             |
| 11284 | 4   | CGL2_11284004 | Protein of unknown function                                   | 585 | complement(2729..4483)   | 191_GENE_3             |
| 11284 | 5   | CGL2_11284005 | Glucose-6-phosphate 1-dehydrogenase (EC 1.1.1.49)             | 495 | complement(4498..5982)   | 191_GENE_4             |
| 11284 | 6   | CGL2_11284006 | Transaldolase                                                 | 974 | complement(6319..9240)   | 191_GENE_5             |
| 11284 | 7   | CGL2_11284007 | Transketolase (EC 2.2.1.1)                                    | 475 | complement(9296..10720)  | 191_GENE_6             |
| 9975  | 1   | CGL2_09975001 | 6-phosphogluconolactonase (EC 3.1.1.31)                       | 19  | complement(41..97)       | 511_GENE_9             |
| 9975  | 2   | CGL2_09975002 | Glucokinase (EC 2.7.1.2)                                      | 347 | complement(348..1388)    | 511_GENE_8             |
| 9975  | 3   | CGL2_09975003 | Hypothetical protein                                          | 92  | complement(1500..1775)   | 511_GENE_7             |
| 9975  | 4   | CGL2_09975004 | Hypothetical protein                                          | 61  | complement(1796..1978)   | 511_GENE_5a            |
| 9975  | 5   | CGL2_09975005 | Protein of unknown function                                   | 185 | complement(2110..2664)   | 511_GENE_5             |
| 9975  | 6   | CGL2_09975006 | Protein of unknown function                                   | 492 | complement(2682..4157)   | 511_GENE_4             |
| 9975  | 7   | CGL2_09975007 | Protein of unknown function                                   | 487 | complement(4360..5820)   | 511_GENE_2             |
| 10139 | 1   | CGL2_10139001 | Conserved protein of unknown function                         | 241 | complement(44..766)      | 736_GENE_4             |
| 10139 | 2   | CGL2_10139002 | DNA/RNA helicase, SNF2 family                                 | 263 | complement(766..1554)    | 736_GENE_2             |
| 10139 | 3   | CGL2_10139003 | DNA/RNA helicase, SNF2 family                                 | 631 | complement(1520..3412)   | 736_GENE_2             |
| 10139 | 4   | CGL2_10139004 | Probable transposase                                          | 458 | 3592..4965               | 412_GENE_6             |
| 10139 | 5   | CGL2_10139005 | Transposase                                                   | 352 | complement(5307..6362)   | 412_GENE_5             |
| 10139 | 7   | CGL2_10139007 | Diguanylate cyclase/phosphodiesterase with PAS/PAL domain     | 250 | 6459..7208               | 412_GENE_4             |
| 10139 | 7   | CGL2_10139007 | Diguanylate cyclase/phosphodiesterase with PAS/PAL domain     | 250 | 6459..7208               | 412_GENE_4             |
| 6867  | 4   | CGL2_06867004 | RNA-directed DNA polymerase (EC 2.7.7.49)                     | 195 | complement(2032..2616)   | NOTE: see end of file- |
| 6867  | 3   | CGL2_06867003 | Hypothetical protein                                          | 155 | complement(1166..1630)   |                        |
| 6867  | 2   | CGL2_06867002 | Hypothetical protein                                          | 213 | complement(116..754)     |                        |
| 11284 | 8   | CGL2_11284008 | Putative transposase                                          | 146 | 10780..11217             | 191_GENE_7             |
| 11284 | 9   | CGL2_11284009 | RNA-directed DNA polymerase (EC 2.7.7.49)                     | 501 | 11597..13099             | 73_GENE_33             |
| 11284 | 10  | CGL2_11284010 | Probable nucleotidyltransferase superfamily protein           | 99  | complement(13299..13595) | gap between gene 73_   |
| 11284 | 10  | CGL2_11284010 | Probable nucleotidyltransferase superfamily protein           | 99  | complement(13299..13595) | 73_GENE_31             |

|       |    |               |                                                     |      |                          |             |
|-------|----|---------------|-----------------------------------------------------|------|--------------------------|-------------|
| 11284 | 12 | CGL2_11284012 | Hypothetical protein                                | 129  | complement(13774..14160) | 73_GENE_29a |
| 11284 | 13 | CGL2_11284013 | Conserved protein of unknown function               | 502  | 14459..15964             | 73_GENE_29  |
| 11284 | 14 | CGL2_11284014 | 3-hydroxyisobutyrate dehydrogenase (EC 1.1.1.31)    | 311  | 16469..17401             | 73_GENE_27  |
| 11284 | 15 | CGL2_11284015 | Probable alpha/beta fold family protein             | 268  | 17401..18204             | 73_GENE_26  |
| 11284 | 16 | CGL2_11284016 | Conserved protein of unknown function               | 157  | 18365..18835             | 73_GENE_25  |
| 11284 | 17 | CGL2_11284017 | Protein of unknown function                         | 85   | complement(18949..19203) | 73_GENE_23a |
| 11284 | 18 | CGL2_11284018 | Hypothetical protein                                | 85   | complement(19362..19616) | 73_GENE_23  |
| 11284 | 19 | CGL2_11284019 | Putative transposase                                | 290  | complement(19609..20478) | 73_GENE_22  |
| 11284 | 20 | CGL2_11284020 | Putative transposase                                | 96   | complement(20451..20738) | 73_GENE_21  |
| 11284 | 21 | CGL2_11284021 | Hypothetical protein                                | 66   | 20895..21092             | 73_GENE_19  |
| 11284 | 22 | CGL2_11284022 | Probable PIIT protein, N-terminal                   | 128  | complement(21183..21566) | 73_GENE_18  |
| 11284 | 23 | CGL2_11284023 | Prevent-host-death family protein                   | 79   | complement(21624..21860) | 73_GENE_17  |
| 11284 | 24 | CGL2_11284024 | Hypothetical protein                                | 96   | complement(21878..22165) | 73_GENE_16  |
| 11284 | 25 | CGL2_11284025 | Plasmid maintenance system antidote protein, XRE f  | 96   | complement(22443..22730) | 73_GENE_14  |
| 11284 | 26 | CGL2_11284026 | Plasmid maintenance system killer                   | 93   | complement(22749..23027) | 73_GENE_13  |
| 11284 | 27 | CGL2_11284027 | Probable transposase                                | 160  | 23491..23970             | 73_GENE_12  |
| 11284 | 28 | CGL2_11284028 | Probable transposase                                | 170  | 24030..24539             | 73_GENE_11  |
| 11284 | 29 | CGL2_11284029 | Probable ATPase protein                             | 159  | 24945..25421             | 73_GENE_9   |
| 11284 | 30 | CGL2_11284030 | Transposase                                         | 380  | 25456..26595             | 73_GENE_8   |
| 11284 | 31 | CGL2_11284031 | ATPase                                              | 135  | 26674..27078             | 73_GENE_7   |
| 11284 | 32 | CGL2_11284032 | Hypothetical protein                                | 82   | complement(27392..27637) | 73_GENE_6   |
| 11284 | 33 | CGL2_11284033 | Probable transposase                                | 335  | complement(27738..28742) | 73_GENE_5   |
| 11284 | 34 | CGL2_11284034 | Putative glycosyl transferase, group 1              | 357  | 29579..30649             | 73_GENE_4   |
| 11284 | 35 | CGL2_11284035 | Putative glycosyl transferase, group 1              | 431  | 30699..31991             | 627_GENE_2  |
| 11284 | 36 | CGL2_11284036 | Undecaprenyl-phosphate galactose phosphotransferase | 502  | 31991..33496             | 73_GENE_1   |
| 11284 | 37 | CGL2_11284037 | Putative ABC transporter permease protein           | 229  | 33526..34212             | 627_GENE_4  |
| 11284 | 40 | CGL2_11284040 | Teichoic-acid-transporting ATPase (EC 3.6.3.40)     | 201  | 34442..35044             | 955_GENE_4  |
| 11284 | 42 | CGL2_11284042 | Probable transposase                                | 133  | 35177..35575             | 659_GENE_7  |
| 11284 | 43 | CGL2_11284043 | Transposase                                         | 314  | complement(35582..36523) | 659_GENE_6  |
| 11284 | 44 | CGL2_11284044 | Probable transposase                                | 180  | 36657..37196             | 659_GENE_5  |
| 11284 | 46 | CGL2_11284046 | Conserved hypothetical protein                      | 189  | complement(37491..38057) | 659_GENE_3  |
| 11284 | 47 | CGL2_11284047 | Hypothetical protein                                | 109  | complement(38060..38386) | 659_GENE_2  |
| 11284 | 48 | CGL2_11284048 | Putative glycosyl transferase, family 2             | 568  | 38669..40372             | 659_GENE_1  |
| 11284 | 49 | CGL2_11284049 | Putative glycosyl transferase, family 2             | 1023 | 40459..43527             |             |
| 11284 | 50 | CGL2_11284050 | Conserved hypothetical protein                      | 441  | complement(43627..44949) |             |
| 10601 | 1  | CGL2_10601001 | Conserved hypothetical protein                      | 50   | complement(312..462)     | 985_GENE_3  |
| 10601 | 2  | CGL2_10601002 | Hypothetical protein                                | 86   | 787..1044                | 985_GENE_4  |
| 10601 | 3  | CGL2_10601003 | Putative metallo-beta-lactamase family protein      | 243  | 1234..1962               | 178_GENE_1  |
| 10601 | 4  | CGL2_10601004 | Probable transcriptional regulator, ArsR family     | 119  | 1988..2344               | 178_GENE_2  |
| 10601 | 5  | CGL2_10601005 | Putative major facilitator superfamily transporter  | 442  | 2344..3669               | 178_GENE_3  |
| 10601 | 6  | CGL2_10601006 | Hypothetical protein                                | 53   | complement(3900..4058)   | 178_GENE_4  |

|       |    |               |                                                   |      |                          |             |
|-------|----|---------------|---------------------------------------------------|------|--------------------------|-------------|
| 10601 | 7  | CGL2_10601007 | Hypothetical protein                              | 76   | 4109..4336               | 178_GENE_4a |
| 10601 | 8  | CGL2_10601008 | Hypothetical protein                              | 152  | 4463..4918               | 178_GENE_5  |
| 10601 | 9  | CGL2_10601009 | Probable outer membrane efflux protein            | 481  | 4994..6436               | 178_GENE_6  |
| 10601 | 10 | CGL2_10601010 | Secretion protein (HlyD)                          | 419  | 6429..7685               | 178_GENE_7  |
| 10601 | 11 | CGL2_10601011 | Heavy metal efflux pump, CzcA family              | 1061 | 7685..10867              | 178_GENE_8  |
| 10601 | 12 | CGL2_10601012 | Conserved protein of unknown function             | 134  | 10885..11286             | 178_GENE_9  |
| 10799 | 26 | CGL2_10799026 | Hypothetical protein                              | 479  | complement(18611..20047) | 178_GENE_10 |
| 10799 | 25 | CGL2_10799025 | Putative IstB-like ATP-binding protein            | 260  | 17590..18369             | 321_GENE_1  |
| 10799 | 24 | CGL2_10799024 | Probable transposase                              | 284  | 16742..17593             | 321_GENE_2  |
| 10799 | 23 | CGL2_10799023 | Putative transposase                              | 351  | 15580..16632             | 321_GENE_3  |
| 10799 | 22 | CGL2_10799022 | Probable transposase                              | 175  | complement(14810..15334) | 321_GENE_4  |
| 10799 | 21 | CGL2_10799021 | Probable transposase                              | 489  | complement(13150..14616) | 321_GENE_5  |
| 10799 | 20 | CGL2_10799020 | Putative IstB-like ATP-binding protein            | 252  | complement(12395..13150) | 321_GENE_6  |
| 10799 | 19 | CGL2_10799019 | Hypothetical protein                              | 70   | complement(12159..12368) | 321_GENE_7  |
| 10799 | 18 | CGL2_10799018 | Putative transposase                              | 384  | complement(10981..12132) | 321_GENE_8  |
| 10799 | 17 | CGL2_10799017 | Putative IstB-like ATP-binding protein            | 292  | complement(10133..11008) | 581_GENE_8  |
| 10799 | 16 | CGL2_10799016 | Probable transposase                              | 161  | 9670..10152              |             |
| 10799 | 15 | CGL2_10799015 | Conserved protein of unknown function             | 360  | 8366..9445               | 45_GENE_46  |
| 10799 | 14 | CGL2_10799014 | Protein of unknown function                       | 120  | 7891..8250               | 45_GENE_45a |
| 10799 | 13 | CGL2_10799013 | Putative transcriptional regulator, TetR family   | 219  | 7222..7878               | 45_GENE_45  |
| 10799 | 12 | CGL2_10799012 | Conserved hypothetical protein                    | 117  | complement(6469..6819)   | 45_GENE_43  |
| 10799 | 11 | CGL2_10799011 | Putative metal dependent phosphohydrolase         | 254  | complement(5091..5852)   | 45_GENE_41  |
| 10799 | 10 | CGL2_10799010 | Conserved protein of unknown function             | 188  | 3936..4499               | 45_GENE_40  |
| 10799 | 9  | CGL2_10799009 | Hypothetical protein                              | 79   | 3570..3806               | 45_GENE_39  |
| 10799 | 8  | CGL2_10799008 | Probable transposase                              | 105  | complement(3021..3335)   | 45_GENE_38  |
| 10799 | 7  | CGL2_10799007 | Probable transposase                              | 115  | complement(2658..3002)   | 45_GENE_37  |
| 10799 | 6  | CGL2_10799006 | Conserved hypothetical protein                    | 62   | complement(2394..2579)   | 45_GENE_36  |
| 10799 | 5  | CGL2_10799005 | Putative PilT protein, N-terminal                 | 140  | 1946..2365               | 45_GENE_35  |
| 10799 | 4  | CGL2_10799004 | Probable plasmid stability protein                | 84   | 1695..1946               | 45_GENE_34  |
| 10799 | 3  | CGL2_10799003 | Conserved protein of unknown function             | 165  | 948..1442                | 45_GENE_33  |
| 10799 | 2  | CGL2_10799002 | Conserved hypothetical protein                    | 137  | 578..988                 | 45_GENE_32  |
| 10799 | 1  | CGL2_10799001 | Probable PilT protein, N-terminal                 | 133  | 172..570                 | 45_GENE_31  |
| 11391 | 30 | CGL2_11391030 | Prevent-host-death protein                        | 81   | 26362..26604             | 45_GENE_30  |
| 11391 | 29 | CGL2_11391029 | Hypothetical protein                              | 49   | complement(26133..26279) | 45_GENE_29  |
| 11391 | 28 | CGL2_11391028 | Conserved hypothetical protein                    | 92   | complement(25809..26084) | 45_GENE_28  |
| 11391 | 27 | CGL2_11391027 | Conserved hypothetical protein                    | 129  | complement(25445..25831) |             |
| 11391 | 26 | CGL2_11391026 | Hypothetical protein                              | 77   | 25000..25230             | 45_GENE_27  |
| 11391 | 25 | CGL2_11391025 | Protein of unknown function                       | 119  | 24550..24906             | 45_GENE_26  |
| 11391 | 24 | CGL2_11391024 | Probable cyclic nucleotide-binding protein        | 249  | 23259..24005             | 45_GENE_25  |
| 11391 | 23 | CGL2_11391023 | Conserved hypothetical protein                    | 428  | complement(21577..22860) | 45_GENE_24  |
| 11391 | 22 | CGL2_11391022 | Putative NADH ubiquinone oxidoreductase, 20 kDa s | 169  | 21041..21547             | 45_GENE_23  |

|       |    |               |                                                       |     |                          |             |
|-------|----|---------------|-------------------------------------------------------|-----|--------------------------|-------------|
| 11391 | 21 | CGL2_11391021 | Putative NADH-ubiquinone oxidoreductase, 49 kDa s     | 499 | 19523..21019             | 45_GENE_22  |
| 11391 | 20 | CGL2_11391020 | NADH dehydrogenase (Quinone) (EC 1.6.99.5)            | 485 | 17998..19452             | 45_GENE_21  |
| 11391 | 19 | CGL2_11391019 | Probable hydrogenase 4 membrane component             | 220 | 17331..17990             | 45_GENE_20  |
| 11391 | 18 | CGL2_11391018 | Putative formate hydrogenlyase subunit 4              | 320 | 16368..17327             | 45_GENE_19  |
| 11391 | 17 | CGL2_11391017 | NADH dehydrogenase (Quinone) (EC 1.6.99.5)            | 686 | 14300..16357             | 45_GENE_18  |
| 11391 | 16 | CGL2_11391016 | Plasmid maintenance system antidote protein, XRE f    | 116 | 13943..14290             | 45_GENE_17  |
| 11391 | 15 | CGL2_11391015 | Hypothetical protein                                  | 297 | 12918..13808             | 45_GENE_16  |
| 11391 | 14 | CGL2_11391014 | Conserved protein of unknown function                 | 218 | 12108..12761             | 45_GENE_15  |
| 11391 | 13 | CGL2_11391013 | Conserved protein of unknown function                 | 483 | complement(10047..11495) | 45_GENE_13  |
| 11391 | 12 | CGL2_11391012 | Conserved protein of unknown function                 | 358 | complement(8989..10062)  | 45_GENE_12  |
| 11391 | 11 | CGL2_11391011 | Conserved protein of unknown function                 | 251 | complement(8014..8766)   | 45_GENE_11  |
| 11391 | 10 | CGL2_11391010 | DNA-3-methyladenine glycosylase (EC 3.2.2.21)         | 211 | complement(7382..8014)   | 45_GENE_10  |
| 11391 | 9  | CGL2_11391009 | Protein of unknown function                           | 137 | complement(6852..7262)   | 45_GENE_9   |
| 11391 | 8  | CGL2_11391008 | Conserved hypothetical protein                        | 211 | complement(5782..6414)   | 45_GENE_8   |
| 11391 | 7  | CGL2_11391007 | Conserved protein of unknown function                 | 173 | complement(5140..5658)   | 45_GENE_7   |
| 11391 | 6  | CGL2_11391006 | Conserved hypothetical protein                        | 363 | complement(3967..5055)   | 45_GENE_6   |
| 11391 | 5  | CGL2_11391005 | Methylated-DNA-[protein]-cysteine S-methyltransfer    | 164 | 3485..3976               | 45_GENE_5   |
| 11391 | 4  | CGL2_11391004 | Putative Ada DNA repair protein and transcriptional r | 477 | 2055..3485               | 45_GENE_4   |
| 11391 | 3  | CGL2_11391003 | Aldo/keto reductase (EC 1.1.1.91)                     | 357 | complement(824..1894)    | 45_GENE_3   |
| 11391 | 2  | CGL2_11391002 | Hypothetical protein                                  | 97  | 496..786                 | 45_GENE_2   |
| 11391 | 1  | CGL2_11391001 | Protein of unknown function                           | 112 | 44..379                  | 45_GENE_1   |
| 9831  | 1  | CGL2_09831001 | Conserved hypothetical protein                        | 333 | 370..1368                | 454_GENE_3  |
| 9831  | 2  | CGL2_09831002 | Hypothetical protein                                  | 44  | 1721..1852               | 454_GENE_4  |
| 9831  | 3  | CGL2_09831003 | Hypothetical protein                                  | 53  | complement(2219..2377)   | 454_GENE_5  |
| 9831  | 4  | CGL2_09831004 | Methyl-accepting chemotaxis sensory transducer with   | 231 | complement(2591..3283)   | 454_GENE_6  |
| 9831  | 5  | CGL2_09831005 | transposase                                           | 140 | 3291..3710               | 454_GENE_8  |
| 11278 | 42 | CGL2_11278042 | Putative methyl-accepting chemotaxis protein          | 247 | 29709..30449             | 81_GENE_5   |
| 11278 | 41 | CGL2_11278041 | Hypothetical protein                                  | 77  | complement(29322..29552) | 81_GENE_6   |
| 11278 | 40 | CGL2_11278040 | Hypothetical protein                                  | 142 | 28412..28837             | 81_GENE_7   |
| 11278 | 39 | CGL2_11278039 | Hypothetical protein                                  | 152 | 27954..28409             | 81_GENE_8   |
| 11278 | 38 | CGL2_11278038 | Hypothetical protein                                  | 187 | complement(26885..27445) | 81_GENE_9   |
| 11278 | 37 | CGL2_11278037 | Hypothetical protein                                  | 50  | 26513..26662             | 81_GENE_10  |
| 11278 | 36 | CGL2_11278036 | Hypothetical protein                                  | 71  | complement(26146..26358) | 81_GENE_11  |
| 11278 | 35 | CGL2_11278035 | Hypothetical protein                                  | 86  | 25771..26028             | 81_GENE_12  |
| 11278 | 33 | CGL2_11278033 | Putative phage integrase                              | 106 | 25429..25746             | 81_GENE_14  |
| 11278 | 32 | CGL2_11278032 | Putative phage integrase                              | 248 | 24690..25433             | 81_GENE_14  |
| 11278 | 30 | CGL2_11278030 | Hypothetical protein                                  | 108 | 24045..24368             | 75_GENE_30  |
| 11278 | 29 | CGL2_11278029 | Hypothetical protein                                  | 72  | complement(23675..23890) | 75_GENE_28a |
| 11278 | 28 | CGL2_11278028 | Putative phage protein Gp37/Gp68                      | 240 | 22928..23647             | 75_GENE_28  |
| 11278 | 27 | CGL2_11278027 | Conserved hypothetical protein                        | 371 | 21809..22921             | 75_GENE_27  |
| 11278 | 26 | CGL2_11278026 | Protein of unknown function                           | 149 | 21363..21809             | 75_GENE_26  |

|           |    |                |                                                      |      |                          |              |
|-----------|----|----------------|------------------------------------------------------|------|--------------------------|--------------|
| 11278     | 25 | CGL2_11278025  | Hypothetical protein                                 | 291  | 20467..21339             | 75_GENE_25   |
| 11278     | 24 | CGL2_11278024  | Hypothetical protein                                 | 133  | 20069..20467             | 75_GENE_24   |
| 11278     | 23 | CGL2_11278023  | Probable O-methyltransferase                         | 199  | 19442..20038             | 75_GENE_23   |
| 11278     | 22 | CGL2_11278022  | Conserved hypothetical protein                       | 224  | 18465..19136             | 75_GENE_22   |
| 11278     | 21 | CGL2_11278021  | Conserved hypothetical protein                       | 162  | complement(17717..18202) | 75_GENE_21   |
| 11278     | 20 | CGL2_11278020  | Putative metallo-beta-lactamase family protein       | 259  | complement(16938..17714) | 75_GENE_20   |
| 11278     | 19 | CGL2_11278019  | Diguanylate cyclase/phosphodiesterase                | 720  | complement(14778..16937) | 75_GENE_19   |
| 11278     | 17 | CGL2_11278017  | Probable methyl-accepting chemotaxis sensory trans   | 275  | complement(13712..14536) | 75_GENE_18   |
| 11278     | 16 | CGL2_11278016  | Probable methyl-accepting chemotaxis sensory trans   | 119  | complement(13340..13696) | 75_GENE_17   |
| 11278     | 15 | CGL2_11278015  | Putative metallo-beta-lactamase family protein       | 248  | complement(12560..13303) | 75_GENE_16   |
| 11278     | 14 | CGL2_11278014  | Probable methyl-accepting chemotaxis sensory trans   | 232  | complement(11849..12544) | 75_GENE_15   |
| 11278     | 13 | CGL2_11278013  | Hypothetical protein                                 | 47   | complement(11102..11242) | 75_GENE_13   |
| 11278     | 12 | CGL2_11278012  | Probable transposase                                 | 87   | complement(10666..10926) | 75_GENE_12   |
| 11278     | 11 | CGL2_11278011  | Conserved hypothetical protein                       | 139  | 10163..10579             | 75_GENE_11   |
| 11278     | 10 | CGL2_11278010  | Hypothetical protein                                 | 210  | 9465..10094              | 75_GENE_10   |
| 11278     | 9  | CGL2_11278009  | Probable transposase                                 | 56   | complement(9086..9253)   | 75_GENE_9    |
| 11278     | 8  | CGL2_11278008  | Putative O-methyltransferase, family 3               | 236  | 8314..9021               | 75_GENE_8    |
| 11278     | 7  | CGL2_11278007  | Conserved hypothetical protein                       | 231  | 7529..8221               | 75_GENE_7    |
| 11278     | 6  | CGL2_11278006  | Conserved hypothetical protein                       | 104  | 7166..7477               | 75_GENE_6    |
| 11278     | 5  | CGL2_11278005  | Hypothetical protein                                 | 57   | 6719..6889               |              |
| 11278     | 4  | CGL2_11278004  | Protein of unknown function                          | 176  | 6107..6634               | 75_GENE_5    |
| 11278     | 3  | CGL2_11278003  | DNA helicase                                         | 1602 | 1228..6033               | 75_GENE_4    |
| 11278     | 2  | CGL2_11278002  | Putative putative phage repressor                    | 224  | 320..991                 | 75_GENE_2    |
| 11278     | 1  | CGL2_11278001  | Hypothetical protein                                 | 72   | complement(18..233)      | 75_GENE_1    |
| 4377      | 1  | CGL2_04377001  | Hypothetical protein                                 | 204  | 557..1168                |              |
| 4377      | 2  | CGL2_04377002  | Conserved hypothetical protein                       | 60   | 1175..1354               |              |
| 2657      | 1  | CGL2_02657001  | Protein of unknown function                          | 104  | 88..399                  |              |
| 02657tRNA |    | CGL2_02657R001 | TRNA Ser CGA                                         |      | 587..677                 |              |
| 2657      | 2  | CGL2_02657002  | Hypothetical protein                                 | 60   | 732..911                 | 376_GENE_1a  |
| 7140      | 1  | CGL2_07140001  | Hypothetical protein                                 | 79   | 70..306                  | 376_GENE_1   |
| 7140      | 2  | CGL2_07140002  | Conserved hypothetical protein                       | 98   | 773..1066                | 376_GENE_3   |
| 8598      | 2  | CGL2_08598002  | Hypothetical protein                                 | 192  | complement(1181..1756)   | 376_GENE_5   |
| 8598      | 1  | CGL2_08598001  | Hypothetical protein                                 | 123  | 907..1275                | 376_GENE_6   |
| 8982      | 7  | CGL2_08982007  | Hypothetical protein                                 | 34   | complement(3294..3395)   | 376_GENE_7   |
| 8982      | 6  | CGL2_08982006  | Hypothetical protein                                 | 61   | complement(3112..3294)   | 376_GENE_8   |
| 8982      | 5  | CGL2_08982005  | Hypothetical protein                                 | 64   | complement(2928..3119)   | 376_GENE_9   |
| 8982      | 4a | CGL2_08982004a | Hypothetical protein                                 | 84   | complement(2680..2928)   |              |
| 8982      | 4  | CGL2_08982004  | Hypothetical protein                                 | 120  | complement(2330..2689)   | 376_GENE_10  |
| 8982      | 3  | CGL2_08982003  | Putative phage replisome organizer, N-terminal regic | 328  | complement(1279..2262)   | 376_GENE_11  |
| 8982      | 2  | CGL2_08982002  | Hypothetical protein                                 | 181  | complement(731..1273)    | 376_GENE_12  |
| 8982      | 1  | CGL2_08982001  | Hypothetical protein                                 | 62   | complement(395..580)     | 376_GENE_12a |

|           |    |                |                                                |     |                          |             |
|-----------|----|----------------|------------------------------------------------|-----|--------------------------|-------------|
| 8581      | 3  | CGL2_08581003  | Hypothetical protein                           | 541 | complement(2408..4030)   | 376_GENE_14 |
| 8581      | 2  | CGL2_08581002  | Hypothetical protein                           | 427 | complement(1092..2372)   | 376_GENE_15 |
| 8581      | 1  | CGL2_08581001  | Hypothetical protein                           | 53  | complement(931..1089)    |             |
| 5939      | 1  | CGL2_05939001  | Hypothetical protein                           | 88  | complement(458..721)     |             |
| 5939      | 2  | CGL2_05939002  | Hypothetical protein                           | 175 | complement(736..1260)    |             |
|           |    |                |                                                |     |                          |             |
| 10965     | 24 | CGL2_10965024  | Putative adenylylsulfate reductase, subunit A  | 524 | complement(18938..20509) | 303_GENE_1  |
| 10965     | 23 | CGL2_10965023  | Probable adenylylsulfate reductase, subunit B  | 114 | complement(18610..18951) | 303_GENE_2  |
| 10965     | 22 | CGL2_10965022  | Sulfate adenylyltransferase (EC 2.7.7.4)       | 393 | complement(17359..18537) | 303_GENE_3  |
| 10965     | 21 | CGL2_10965021  | Putative transcriptional regulator, XRE family | 121 | 16859..17221             | 303_GENE_4  |
| 10965     | 20 | CGL2_10965020  | Conserved hypothetical protein                 | 64  | complement(16608..16799) | 303_GENE_5  |
| 10965     | 19 | CGL2_10965019  | Putative radical SAM superfamily transporter   | 445 | complement(14911..16245) | 303_GENE_6  |
| 10965     | 18 | CGL2_10965018  | Putative transport protein                     | 506 | complement(13352..14869) | 303_GENE_7  |
| 10965     | 17 | CGL2_10965017  | Hypothetical protein                           | 65  | complement(13158..13352) | 303_GENE_9  |
| 10965tRNA |    | CGL2_10965R001 | TRNA Met CAT                                   |     | complement(13089..13164) |             |
| 10965     | 16 | CGL2_10965016  | transposase                                    | 476 | 11276..12703             | 303_GENE_10 |
|           |    |                |                                                |     |                          |             |
| 7414      | 1  | CGL2_07414001  | Hypothetical protein                           | 130 | 262..651                 | 539_GENE_9  |
| 07414tRNA |    | CGL2_07414R001 | TRNA Met CAT                                   |     | 55..130                  |             |
| 7414      | 2  | CGL2_07414002  | Hypothetical protein                           | 149 | complement(730..1176)    | 539_GENE_8  |
| 7414      | 3  | CGL2_07414003  | Hypothetical protein                           | 91  | complement(1179..1451)   | 539_GENE_7  |
| 9479      | 2  | CGL2_09479002  | Hypothetical protein                           | 134 | 2537..2938               | 539_GENE_4  |
| 9479      | 1  | CGL2_09479001  | Phage/plasmid primase P4, C-terminal           | 730 | 366..2555                | 539_GENE_3  |
|           |    |                |                                                |     |                          |             |
| 10305     | 1  | CGL2_10305001  | Hypothetical protein                           | 149 | complement(1119..1565)   |             |
| 10305     | 2  | CGL2_10305002  | Hypothetical protein                           | 226 | complement(1568..2245)   |             |
| 10305     | 3  | CGL2_10305003  | Conserved hypothetical protein                 | 229 | complement(2921..3607)   |             |
| 10305     | 4  | CGL2_10305004  | DNA primase                                    | 717 | complement(3607..5757)   |             |
| 10305     | 5  | CGL2_10305005  | Hypothetical protein                           | 64  | complement(5772..5963)   | 51_GENE_2   |
| 10305     | 6  | CGL2_10305006  | Hypothetical protein                           | 259 | complement(6104..6880)   | 798_GENE_3  |
| 10305     | 7  | CGL2_10305007  | Conserved protein of unknown function          | 69  | complement(6912..7118)   | 798_GENE_4  |
| 10305     | 8  | CGL2_10305008  | Conserved hypothetical protein                 | 67  | complement(7118..7318)   | 798_GENE_5  |
| 10305     | 9  | CGL2_10305009  | Putative phage integrase                       | 161 | complement(7353..7835)   |             |
| 10965     | 15 | CGL2_10965015  | transposition helper protein, IstB             | 97  | complement(10987..11277) | 443_GENE_2  |
| 10965     | 14 | CGL2_10965014  | integrase Rci fragment (partial domain)        | 155 | 10438..10902             | 443_GENE_3  |
| 10965     | 13 | CGL2_10965013  | Hypothetical protein                           | 72  | complement(10199..10414) | 443_GENE_4  |
| 10965     | 12 | CGL2_10965012  | Hypothetical protein                           | 38  | complement(10086..10199) | 443_GENE_5  |
| 10965     | 11 | CGL2_10965011  | Hypothetical protein                           | 151 | 9541..9993               | 443_GENE_6  |
| 10965     | 10 | CGL2_10965010  | Hypothetical protein                           | 71  | 8861..9073               | 443_GENE_7  |
| 10965     | 9  | CGL2_10965009  | transposase                                    | 209 | complement(8174..8800)   | 443_GENE_8  |

|           |    |                |                                                        |     |                          |             |
|-----------|----|----------------|--------------------------------------------------------|-----|--------------------------|-------------|
| 10965     | 8  | CGL2_10965008  | transposase                                            | 175 | complement(7650..8174)   | 443_GENE_9  |
| 10965     | 7  | CGL2_10965007  | Hypothetical protein                                   | 224 | 6745..7416               | 443_GENE_10 |
| 10965     | 6  | CGL2_10965006  | Hypothetical protein                                   | 126 | 6368..6745               |             |
| 10965     | 5  | CGL2_10965005  | Protein of unknown function                            | 238 | complement(5135..5848)   | 41_GENE_1   |
| 10965     | 4  | CGL2_10965004  | Putative sigma54 specific transcriptional regulator, F | 454 | 3651..5012               | 41_GENE_2   |
| 10965     | 3  | CGL2_10965003  | Cytochrome bd ubiquinol oxidase, subunit I             | 534 | complement(1859..3460)   | 41_GENE_4   |
| 10965     | 2  | CGL2_10965002  | Cytochrome bd ubiquinol oxidase, subunit II            | 379 | complement(727..1863)    | 41_GENE_5   |
| 10965     | 1  | CGL2_10965001  | Cyd operon protein (YbgT)                              | 43  | complement(556..684)     | 41_GENE_6   |
| 10961     | 1  | CGL2_10961001  | Putative sulfide-quinone reductase                     | 424 | 457..1728                | 41_GENE_7   |
| 10961     | 2  | CGL2_10961002  | Putative radical SAM superfamily protein               | 366 | complement(1768..2865)   | 41_GENE_8   |
| 10961     | 3  | CGL2_10961003  | Conserved protein of unknown function                  | 150 | complement(2902..3351)   | 41_GENE_9   |
| 10961     | 4  | CGL2_10961004  | Conserved hypothetical protein                         | 103 | complement(3441..3749)   | 41_GENE_10  |
| 10961     | 5  | CGL2_10961005  | Probable major facilitator superfamily transporter     | 430 | complement(3733..5022)   | 41_GENE_11  |
| 10961     | 6  | CGL2_10961006  | Putative glycosyl transferase, family 9                | 423 | complement(5022..6290)   | 41_GENE_12  |
| 10961     | 7  | CGL2_10961007  | Putative two component transcriptional regulator, Lu   | 211 | complement(6413..7045)   | 41_GENE_13  |
| 10961     | 8  | CGL2_10961008  | Putative periplasmic sensor signal transduction histic | 532 | complement(7045..8640)   | 41_GENE_14  |
| 10961     | 9  | CGL2_10961009  | Putative amino acid permease                           | 665 | complement(8612..10606)  | 41_GENE_15  |
| 10961     | 10 | CGL2_10961010  | Conserved protein of unknown function                  | 482 | complement(10712..12157) | 41_GENE_16  |
| 10961     | 11 | CGL2_10961011  | Potassium-transporting ATPase, C subunit (EC 3.6.3.    | 205 | complement(12266..12880) | 41_GENE_17  |
| 10961     | 12 | CGL2_10961012  | Potassium-transporting ATPase, A subunit (EC 3.6.3.    | 567 | complement(12939..14639) | 41_GENE_18  |
| 10961     | 13 | CGL2_10961013  | Potassium-translocating P-type ATPase, B subunit (E    | 670 | complement(14860..16869) | 41_GENE_19  |
| 10961     | 14 | CGL2_10961014  | Protein of unknown function                            | 202 | complement(17129..17734) | 41_GENE_20  |
| 10961     | 15 | CGL2_10961015  | Hypothetical protein                                   | 212 | complement(17883..18518) | 41_GENE_21  |
| 10961     | 16 | CGL2_10961016  | Hypothetical protein                                   | 199 | complement(18784..19380) | 41_GENE_22  |
| 10961     | 17 | CGL2_10961017  | Protein of unknown function                            | 214 | complement(19725..20366) | 41_GENE_24  |
| 10961     | 18 | CGL2_10961018  | Putative osmosensitive K+ channel signal transductic   | 741 | 20561..22783             | 41_GENE_25  |
| 10961     | 19 | CGL2_10961019  | Hypothetical protein                                   | 192 | 22925..23500             | 41_GENE_26  |
| 10961     | 20 | CGL2_10961020  | Protein of unknown function                            | 309 | 23535..24461             | 41_GENE_27  |
| 10961     | 21 | CGL2_10961021  | Putative NAD-binding 6-phosphogluconate dehydrog       | 307 | complement(24476..25396) | 41_GENE_28  |
| 10961     | 22 | CGL2_10961022  | Putative peroxiredoxin                                 | 191 | complement(25396..25968) | 41_GENE_29  |
| 10961     | 23 | CGL2_10961023  | Probable Dyp-type peroxidase                           | 295 | complement(26137..27021) | 41_GENE_30  |
| 10961     | 24 | CGL2_10961024  | Putative CoA-binding protein                           | 148 | complement(27114..27557) | 41_GENE_31  |
| 10961     | 25 | CGL2_10961025  | Probable ferredoxin                                    | 420 | 27772..29031             | 41_GENE_33  |
| 10961     | 27 | CGL2_10961027  | Conserved protein of unknown function                  | 197 | 29119..29709             | 41_GENE_34  |
| 10961     | 28 | CGL2_10961028  | Cysteine desulfurase (EC 2.8.1.7)                      | 390 | 29705..30874             | 41_GENE_35  |
| 10961     | 29 | CGL2_10961029  | Putative NAD-dependent epimerase/dehydratase           | 298 | 30915..31808             | 41_GENE_36  |
| 10961tRNA |    | CGL2_10961R001 | TRNA Leu CAG                                           |     | complement(32176..32261) |             |
| 10961tRNA |    | CGL2_10961R002 | TRNA Arg TCT                                           |     | complement(32500..32576) |             |
| 10961     | 30 | CGL2_10961030  | Hypothetical protein                                   | 68  | complement(32609..32812) | 287_GENE_8  |
| 10961     | 31 | CGL2_10961031  | Putative glutaredoxin                                  | 129 | complement(32898..33284) | 287_GENE_7  |
| 10961     | 32 | CGL2_10961032  | Protein of unknown function                            | 450 | 33491..34840             | 287_GENE_6  |

|       |       |                |                                                       |      |                          |            |
|-------|-------|----------------|-------------------------------------------------------|------|--------------------------|------------|
| 10961 | 33    | CGL2_10961033  | Hypothetical protein                                  | 551  | 34846..36498             | 287_GENE_5 |
| 10961 | 34    | CGL2_10961034  | Protein of unknown function                           | 206  | 36552..37169             | 287_GENE_4 |
| 10961 | 35    | CGL2_10961035  | Peptide methionine sulfoxide reductase (EC 1.8.4.6)   | 185  | complement(37167..37721) | 287_GENE_3 |
| 10961 | 36    | CGL2_10961036  | Diguanylate cyclase/phosphodiesterase                 | 702  | 38235..40340             | 287_GENE_2 |
| 10961 | 37    | CGL2_10961037  | Protein of unknown function                           | 206  | 40754..41371             | 86_GENE_19 |
| 10961 | 38    | CGL2_10961038  | Conserved hypothetical protein                        | 63   | 41554..41742             | 86_GENE_18 |
| 10961 | 39    | CGL2_10961039  | Protein of unknown function                           | 356  | 41864..42931             | 86_GENE_17 |
| 10961 | 40    | CGL2_10961040  | Protein of unknown function                           | 215  | 42988..43632             | 86_GENE_16 |
| 10961 | trRNA | CGL2_10961R003 | TRNA Lys TTT                                          |      | complement(44332..44407) |            |
| 10961 | 41    | CGL2_10961041  | Conserved hypothetical protein                        | 361  | complement(44444..45526) | 86_GENE_14 |
| 10961 | 42    | CGL2_10961042  | 3-isopropylmalate dehydratase small subunit (EC 4.2   | 208  | complement(45591..46214) | 86_GENE_13 |
| 10961 | 43    | CGL2_10961043  | 3-isopropylmalate dehydratase large subunit (EC 4.2   | 465  | complement(46251..47645) | 86_GENE_12 |
| 10961 | 44    | CGL2_10961044  | DTDP-glucose 4,6-dehydratase (EC 4.2.1.46)            | 357  | 47836..48906             | 86_GENE_11 |
| 10961 | 45    | CGL2_10961045  | Glucose-1-phosphate thymidyltransferase (EC 2.7.7.    | 299  | 48906..49802             | 86_GENE_10 |
| 10961 | 47    | CGL2_10961047  | DTDP-4-dehydrorhamnose 3,5-epimerase (EC 5.1.3.       | 183  | 49802..50350             | 86_GENE_9  |
| 10961 | 48    | CGL2_10961048  | Putative major facilitator superfamily transporter    | 425  | complement(50382..51656) | 86_GENE_8  |
| 10961 | 49    | CGL2_10961049  | Conserved protein of unknown function                 | 316  | 51803..52750             | 86_GENE_7  |
| 10961 | 50    | CGL2_10961050  | Diguanylate cyclase/phosphodiesterase with PAS/PAC    | 878  | 52830..55463             | 86_GENE_6  |
| 10961 | 51    | CGL2_10961051  | Putative phosphoglycerate mutase                      | 156  | 55498..55965             | 86_GENE_5  |
| 10961 | 52    | CGL2_10961052  | Glutamate decarboxylase (EC 4.1.1.15)                 | 457  | complement(56012..57382) | 86_GENE_4  |
| 10961 | 53    | CGL2_10961053  | Malto-oligosyltrehalose trehalohydrolase (EC 3.2.1.1. | 637  | 57614..59524             | 86_GENE_3  |
| 10961 | 54    | CGL2_10961054  | Malto-oligosyltrehalose synthase (EC 5.4.99.15)       | 965  | 59524..62418             | 86_GENE_2  |
| 10961 | 55    | CGL2_10961055  | Trehalose synthase (EC 5.4.99.16)                     | 556  | 62418..64085             | 213_GENE_8 |
| 10961 | 56    | CGL2_10961056  | Trehalose synthase (EC 5.4.99.16)                     | 559  | 64085..65761             | 213_GENE_7 |
| 10961 | 57    | CGL2_10961057  | Putative fatty acid desaturase                        | 338  | complement(65872..66885) | 213_GENE_6 |
| 10961 | 58    | CGL2_10961058  | Diguanylate cyclase                                   | 386  | complement(67097..68254) | 213_GENE_5 |
| 10961 | 59    | CGL2_10961059  | Hypothetical protein                                  | 280  | 69037..69876             | 213_GENE_4 |
| 10961 | 60    | CGL2_10961060  | Diguanylate cyclase                                   | 380  | complement(69911..71050) | 213_GENE_3 |
| 10961 | 61    | CGL2_10961061  | Protein of unknown function                           | 211  | complement(71244..71876) | 206_GENE_8 |
| 10961 | 62    | CGL2_10961062  | Hypothetical protein                                  | 67   | complement(71932..72132) | 206_GENE_7 |
| 10954 | 1     | CGL2_10954001  | Putative alpha amylase, catalytic region              | 663  | 1250..3238               | 206_GENE_6 |
| 10954 | 2     | CGL2_10954002  | Probable alpha amylase, catalytic region              | 523  | 3238..4806               | 206_GENE_5 |
| 10954 | 3     | CGL2_10954003  | Zinc-containing alcohol dehydrogenase superfamily (   | 347  | 5003..6043               | 206_GENE_4 |
| 10954 | 4     | CGL2_10954004  | Hypothetical protein                                  | 107  | 6396..6716               | 206_GENE_3 |
| 10954 | 5     | CGL2_10954005  | Diguanylate cyclase with PAS/PAC sensor               | 1029 | 6892..9978               | 206_GENE_2 |
| 10954 | 6     | CGL2_10954006  | Putative enoyl-CoA hydratase/isomerase                | 288  | complement(10723..11586) | 206_GENE_1 |
| 10954 | 7     | CGL2_10954007  | Putative multi-sensor hybrid histidine kinase         | 849  | complement(11980..14526) | 7_GENE_62  |
| 10954 | 8     | CGL2_10954008  | Putative response regulator receiver modulated metz   | 376  | complement(14619..15746) | 7_GENE_61  |
| 10954 | 9     | CGL2_10954009  | Hypothetical protein                                  | 231  | complement(16126..16818) | 7_GENE_59  |
| 10954 | 10    | CGL2_10954010  | Hypothetical protein                                  | 295  | complement(17224..18108) | 7_GENE_58  |
| 10954 | 11    | CGL2_10954011  | Hypothetical protein                                  | 505  | complement(18543..20057) | 7_GENE_57  |

|       |    |               |                                                        |      |                          |            |
|-------|----|---------------|--------------------------------------------------------|------|--------------------------|------------|
| 10954 | 12 | CGL2_10954012 | Probable TPR-domain containing protein                 | 1076 | complement(20057..23284) | 7_GENE_56  |
| 10954 | 13 | CGL2_10954013 | Methyltransferase, FkbM family                         | 262  | complement(23911..24696) | 7_GENE_54  |
| 10954 | 14 | CGL2_10954014 | Putative ABC transporter, ATP-binding protein          | 609  | complement(24824..26650) | 7_GENE_53  |
| 10954 | 15 | CGL2_10954015 | Hypothetical protein                                   | 299  | complement(26650..27546) | 7_GENE_52  |
| 10954 | 16 | CGL2_10954016 | SAM-dependent methyltransferase                        | 286  | complement(27894..28751) | 7_GENE_51  |
| 10954 | 17 | CGL2_10954017 | Probable glycosyl transferase                          | 439  | complement(28918..30234) | 7_GENE_50  |
| 10954 | 18 | CGL2_10954018 | Putative glycosyl transferase, family 2                | 364  | complement(30285..31376) | 7_GENE_49  |
| 10954 | 19 | CGL2_10954019 | Protein of unknown function                            | 351  | complement(31418..32470) | 7_GENE_48  |
| 10954 | 20 | CGL2_10954020 | Putative glycosyl transferase, family 2                | 367  | complement(32530..33630) | 7_GENE_47  |
| 10954 | 21 | CGL2_10954021 | Probable glycosyl transferase, family 2                | 625  | complement(33764..35638) | 7_GENE_46  |
| 10954 | 22 | CGL2_10954022 | Protein of unknown function                            | 681  | complement(35644..37686) | 7_GENE_45  |
| 10954 | 23 | CGL2_10954023 | Putative two component, sigma54 specific, transcript   | 471  | complement(37766..39178) | 7_GENE_44  |
| 10954 | 24 | CGL2_10954024 | Conserved hypothetical protein                         | 237  | complement(39178..39888) | 7_GENE_43  |
| 10954 | 25 | CGL2_10954025 | Eight transmembrane protein (EpsH)                     | 276  | complement(39881..40708) | 7_GENE_42  |
| 10954 | 26 | CGL2_10954026 | UTP-glucose-1-phosphate uridylyltransferase (EC 2.7    | 307  | complement(40698..41618) | 7_GENE_41  |
| 10954 | 27 | CGL2_10954027 | Putative periplasmic sensor signal transduction histic | 704  | complement(42142..44253) | 7_GENE_39  |
| 10954 | 28 | CGL2_10954028 | Putative glycosyl transferase, family 2                | 329  | 44593..45579             | 7_GENE_38  |
| 10954 | 29 | CGL2_10954029 | Putative glycosyl transferase, family 2                | 336  | complement(45689..46696) | 7_GENE_37  |
| 10954 | 30 | CGL2_10954030 | Hypothetical protein                                   | 621  | 47061..48923             | 7_GENE_36  |
| 10954 | 31 | CGL2_10954031 | O-antigen polymerase                                   | 503  | 48994..50502             | 7_GENE_35  |
| 10954 | 32 | CGL2_10954032 | Putative glycosyl transferase, group 1                 | 374  | 50502..51623             | 7_GENE_34  |
| 10954 | 33 | CGL2_10954033 | Putative polysaccharide deacetylase                    | 653  | 51619..53577             | 7_GENE_33  |
| 10954 | 34 | CGL2_10954034 | Putative glycosyl transferase, group 1                 | 394  | 53577..54758             | 7_GENE_32  |
| 10954 | 35 | CGL2_10954035 | Probable glycosyltransferase                           | 381  | 54752..55894             | 7_GENE_31  |
| 10954 | 36 | CGL2_10954036 | Putative polysaccharide deacetylase                    | 269  | 55882..56688             | 7_GENE_30  |
| 10954 | 37 | CGL2_10954037 | Conserved hypothetical protein                         | 504  | 56688..58199             | 7_GENE_29  |
| 10954 | 38 | CGL2_10954038 | Putative polysaccharide export protein                 | 285  | 58366..59220             | 7_GENE_28  |
| 10954 | 39 | CGL2_10954039 | Putative glycosyltransferase                           | 447  | 59257..60597             | 7_GENE_27  |
| 10954 | 40 | CGL2_10954040 | Probable lipopolysaccharide biosynthesis protein       | 660  | 60620..62599             | 7_GENE_26  |
| 10954 | 41 | CGL2_10954041 | Conserved hypothetical protein                         | 128  | complement(62821..63204) | 7_GENE_25  |
| 10954 | 42 | CGL2_10954042 | Conserved hypothetical protein                         | 75   | complement(63204..63428) | 7_GENE_24  |
| 10954 | 43 | CGL2_10954043 | Hypothetical protein                                   | 99   | complement(63468..63764) | 7_GENE_23  |
| 10954 | 44 | CGL2_10954044 | Hypothetical protein                                   | 170  | complement(63772..64281) | 7_GENE_21a |
| 10954 | 45 | CGL2_10954045 | Conserved hypothetical protein                         | 85   | 64627..64881             | 7_GENE_21  |
| 10954 | 46 | CGL2_10954046 | RNA polymerase sigma factor                            | 193  | 64881..65459             | 7_GENE_20  |
| 10954 | 47 | CGL2_10954047 | Hypothetical protein                                   | 153  | 65590..66048             | 7_GENE_19  |
| 10954 | 48 | CGL2_10954048 | Mercuric reductase (EC 1.16.1.1)                       | 557  | 66148..67818             | 7_GENE_18  |
| 10954 | 48 | CGL2_10954048 | Mercuric reductase (EC 1.16.1.1)                       | 557  | 66148..67818             | 7_GENE_18  |
| 10954 | 50 | CGL2_10954050 | Putative transcriptional regulator, MerR family        | 135  | 67864..68268             | 7_GENE_17  |
| 10954 | 51 | CGL2_10954051 | Putative mechanosensitive ion channel (MscS)           | 365  | complement(68413..69507) | 7_GENE_16  |
| 10954 | 52 | CGL2_10954052 | Diguanylate cyclase                                    | 371  | complement(69689..70801) | 7_GENE_15  |

|           |     |                     |                                                        |                     |                            |             |
|-----------|-----|---------------------|--------------------------------------------------------|---------------------|----------------------------|-------------|
| 10954     | 53  | CGL2_10954053       | Hypothetical protein                                   | 108                 | 71327..71650               | 7_GENE_14   |
| 10954     | 54  | CGL2_10954054       | DNA adenine methylase (EC 2.1.1.72)                    | 634                 | 71980..73881               | 7_GENE_13   |
| 10954     | 55  | CGL2_10954055       | UDP-galactopyranose mutase (EC 5.4.99.9)               | 367                 | complement(74009..75109)   | 7_GENE_12   |
| 10954     | 56  | CGL2_10954056       | UDP-glucuronate 5'-epimerase (EC 5.1.3.12)             | 341                 | complement(75173..76195)   | 7_GENE_11   |
| 10954     | 58  | CGL2_10954058       | Probable adenylate cyclase                             | 1202                | complement(76310..79915)   | 7_GENE_10   |
| 10954     | 59  | CGL2_10954059       | Putative sigma54 specific transcriptional regulator, F | 518                 | 80349..81902               | 7_GENE_9    |
| 10954     | 60  | CGL2_10954060       | Glucosamine--fructose-6-phosphate aminotransferas      | 615                 | 83321..85165               | 7_GENE_8    |
| 10954     | 61  | CGL2_10954061       | UDP-glucose 6-dehydrogenase (EC 1.1.1.22)              | 433                 | 85205..86503               | 7_GENE_7    |
| 10954     | 62  | CGL2_10954062       | Protein of unknown function                            | 170                 | 86533..87042               | 7_GENE_6    |
| 10954     | 63  | CGL2_10954063       | UDP-glucose 4-epimerase (EC 5.1.3.2)                   | 316                 | 87101..88048               | 7_GENE_5    |
| 10954     | 64  | CGL2_10954064       | Putative sigma54 specific transcriptional regulator, F | 475                 | complement(88049..89473)   | 7_GENE_4    |
| 10954     | 65  | CGL2_10954065       | Putative protein-tyrosine-phosphatase                  | 189                 | 89750..90316               | 7_GENE_3    |
| 10954     | 66  | CGL2_10954066       | Diguanylate cyclase/phosphodiesterase with PAS/PAI     | 747                 | 90463..92703               | 7_GENE_2    |
| 10954     | 67  | CGL2_10954067       | Hypothetical protein                                   | 213                 | complement(93158..93796)   | 7_GENE_1    |
| 10954     | 68  | CGL2_10954068       | transposase                                            | 117                 | complement(94809..95159)   | 2_GENE_128  |
|           |     | Strain variant path | Strain variant path                                    | Strain variant path |                            |             |
| 11068tRNA |     | CGL2_11068R002      | TRNA Glu TTC                                           |                     | 135482..135559             |             |
| 11068     | 123 | CGL2_11068123       | Succinyl-CoA synthetase, beta subunit                  | 416                 | complement(133987..135234) | 2_GENE_126  |
| 11068     | 122 | CGL2_11068122       | Succinyl-CoA synthetase, alpha subunit (EC 6.2.1.5)    | 328                 | complement(132956..133939) | 2_GENE_123  |
| 11068     | 121 | CGL2_11068121       | Hypothetical protein                                   | 50                  | complement(132772..132921) | 2_GENE_122  |
| 11068     | 120 | CGL2_11068120       | Aconitate hydratase (EC 4.2.1.3)                       | 641                 | complement(130542..132464) | 2_GENE_121  |
| 11068     | 119 | CGL2_11068119       | Probable citrate synthase                              | 269                 | complement(129639..130445) | 2_GENE_120  |
| 11068     | 118 | CGL2_11068118       | Conserved hypothetical protein                         | 200                 | complement(128965..129564) | 2_GENE_119  |
| 11068     | 117 | CGL2_11068117       | Probable ferredoxin                                    | 228                 | complement(128170..128853) | 2_GENE_118  |
| 11068     | 116 | CGL2_11068116       | L-aspartate oxidase (EC 1.4.3.16)                      | 540                 | complement(126551..128170) | 2_GENE_117  |
| 11068     | 115 | CGL2_11068115       | Succinyl-CoA synthetase, beta subunit (EC 6.2.1.5)     | 396                 | complement(125285..126472) | 2_GENE_116  |
| 11068     | 114 | CGL2_11068114       | Succinyl-CoA synthetase, alpha subunit (EC 6.2.1.5)    | 305                 | complement(124371..125285) | 2_GENE_115  |
| 11068     | 113 | CGL2_11068113       | Putative thioredoxin peroxidase                        | 153                 | complement(123798..124256) | 2_GENE_114  |
| 11068     | 112 | CGL2_11068112       | Protein of unknown function                            | 180                 | 123103..123642             | 2_GENE_113  |
| 11068     | 111 | CGL2_11068111       | Conserved hypothetical protein                         | 80                  | 122758..122997             | 2_GENE_111a |
| 11068     | 110 | CGL2_11068110       | Conserved protein of unknown function                  | 148                 | complement(122091..122534) | 2_GENE_111  |
| 11068     | 109 | CGL2_11068109       | S-adenosyl-methyltransferase (MraW)                    | 307                 | complement(121153..122073) | 2_GENE_110  |
| 11068     | 108 | CGL2_11068108       | Hypothetical protein                                   | 91                  | complement(120888..121160) | 2_GENE_109  |
| 11068     | 107 | CGL2_11068107       | Peptidoglycan glycosyltransferase (EC 2.4.1.129)       | 578                 | complement(119060..120793) | 2_GENE_108  |
| 11068     | 106 | CGL2_11068106       | UDP-N-acetylmuramoylalanyl-D-glutamate--2, 6-dia       | 509                 | complement(117484..119010) | 2_GENE_107  |
| 11068     | 105 | CGL2_11068105       | UDP-N-acetylmuramoyl-tripeptide--D-alanyl-D-alanir     | 495                 | complement(116000..117484) | 2_GENE_106  |
| 11068     | 104 | CGL2_11068104       | Phospho-N-acetylmuramoyl-pentapeptide-transferas       | 357                 | complement(114927..115997) | 2_GENE_105  |
| 11068     | 103 | CGL2_11068103       | UDP-N-acetylmuramoylalanine--D-glutamate ligase (      | 487                 | complement(113429..114889) | 2_GENE_104  |
| 11068     | 102 | CGL2_11068102       | Putative cell division protein (FtsW)                  | 396                 | complement(112242..113429) | 2_GENE_103  |
| 11068     | 101 | CGL2_11068101       | N-acetylglucosaminyltransferase, MurG (EC 2.4.1.22     | 371                 | complement(111130..112242) | 2_GENE_102  |
| 11068     | 100 | CGL2_11068100       | UDP-N-acetylmuramate--L-alanine ligase (EC 6.3.2.8     | 464                 | complement(109615..111006) | 2_GENE_101  |

|           |     |                |                                                         |     |                            |            |
|-----------|-----|----------------|---------------------------------------------------------|-----|----------------------------|------------|
| 11068     | 99  | CGL2_11068099  | UDP-N-acetylenolpyruvoylglucosamine reductase (EC       | 304 | complement(108704..109615) | 2_GENE_100 |
| 11068     | 98  | CGL2_11068098  | D-alanine--D-alanine ligase (EC 6.3.2.4)                | 303 | complement(107742..108650) | 2_GENE_99  |
| 11068     | 97  | CGL2_11068097  | Protein of unknown function                             | 286 | complement(106879..107736) | 2_GENE_98  |
| 11068     | 96  | CGL2_11068096  | Cell division protein (FtsA)                            | 442 | complement(105459..106784) | 2_GENE_97  |
| 11068     | 95  | CGL2_11068095  | Cell division protein (FtsZ)                            | 390 | complement(104238..105407) | 2_GENE_96  |
| 11068     | 94  | CGL2_11068094  | Conserved hypothetical protein                          | 216 | complement(103587..104234) | 2_GENE_95  |
| 11068     | 93  | CGL2_11068093  | Conserved protein of unknown function                   | 230 | complement(102887..103576) | 2_GENE_94  |
| 11068     | 92  | CGL2_11068092  | Pyrroline-5-carboxylate reductase (EC 1.5.1.2)          | 288 | complement(102019..102882) | 2_GENE_93  |
| 11068     | 91  | CGL2_11068091  | Conserved hypothetical protein                          | 72  | complement(101796..102011) | 2_GENE_92  |
| 11068     | 90  | CGL2_11068090  | Probable cell-division initiation protein               | 175 | complement(101221..101745) | 2_GENE_91  |
| 11068     | 89  | CGL2_11068089  | Conserved hypothetical protein                          | 102 | complement(100897..101202) | 2_GENE_90  |
| 11068     | 88  | CGL2_11068088  | Protein of unknown function                             | 199 | 100298..100894             | 2_GENE_89  |
| 11068     | 87a | CGL2_11068087a | Probable transposase                                    | 197 | 99506..100096              |            |
| 11068     | 87  | CGL2_11068087  | Squalene-hopene cyclase (EC 5.4.99.17)                  | 683 | complement(96980..99028)   | 2_GENE_87  |
| 11068     | 86  | CGL2_11068086  | Protein of unknown function                             | 262 | complement(96195..96980)   | 2_GENE_86  |
| 11068     | 85  | CGL2_11068085  | Conserved protein of unknown function                   | 446 | complement(94858..96195)   | 2_GENE_85  |
| 11068     | 84  | CGL2_11068084  | Protein of unknown function                             | 232 | 94211..94906               | 2_GENE_84  |
| 11068     | 83  | CGL2_11068083  | Dihydroflavonol 4-reductase (EC 1.1.1.219)              | 336 | complement(93047..94054)   | 2_GENE_83  |
| 11068     | 82  | CGL2_11068082  | 4-hydroxy-3-methylbut-2-enyl diphosphate reductas       | 302 | complement(92054..92959)   | 2_GENE_82  |
| 11068     | 81  | CGL2_11068081  | Putative radical SAM family protein                     | 479 | complement(90578..92014)   | 2_GENE_81  |
| 11068     | 80  | CGL2_11068080  | Ceramide glucosyltransferase (EC 2.4.1.80)              | 412 | complement(89327..90562)   | 2_GENE_80  |
| 11068     | 79  | CGL2_11068079  | Conserved hypothetical protein                          | 97  | complement(88941..89231)   | 2_GENE_79  |
| 11068     | 78  | CGL2_11068078  | Conserved hypothetical protein                          | 257 | complement(88143..88913)   | 2_GENE_78  |
| 11068     | 77  | CGL2_11068077  | Putative cobalamin (Vitamin B12) biosynthesis (CbiX     | 276 | complement(87206..88033)   | 2_GENE_77  |
| 11068     | 76  | CGL2_11068076  | Uroporphyrinogen decarboxylase (EC 4.1.1.37)            | 356 | complement(86136..87203)   | 2_GENE_76  |
| 11068     | 75  | CGL2_11068075  | Oxygen-independent coproporphyrinogen III oxidase       | 459 | complement(84684..86060)   | 2_GENE_75  |
| 11068     | 74  | CGL2_11068074  | Protein of unknown function                             | 126 | 84204..84581               | 2_GENE_74  |
| 11068tRNA |     | CGL2_11068R001 | TRNA Ala GGC                                            |     | complement(83757..83832)   |            |
| 11068     | 73  | CGL2_11068073  | S-adenosylmethionine synthetase (EC 2.5.1.6)            | 404 | complement(82156..83367)   | 2_GENE_72  |
| 11068     | 72  | CGL2_11068072  | Adenosylhomocysteinase (EC 3.3.1.1)                     | 418 | complement(80813..82066)   | 2_GENE_71  |
| 11068     | 71  | CGL2_11068071  | Thiamine biosynthesis protein (ThiS)                    | 76  | complement(80579..80806)   | 2_GENE_70  |
| 11068     | 70  | CGL2_11068070  | Cysteine synthase (EC 2.5.1.47)                         | 312 | complement(79663..80598)   | 2_GENE_69  |
| 11068     | 69  | CGL2_11068069  | Putative ThiF family protein                            | 270 | complement(78814..79623)   | 2_GENE_68  |
| 11068     | 68  | CGL2_11068068  | Threonine synthase (EC 4.2.3.1)                         | 407 | complement(77571..78791)   | 2_GENE_67  |
| 11068     | 67  | CGL2_11068067  | Putative ThiS family protein                            | 93  | complement(77268..77546)   | 2_GENE_66  |
| 11068     | 66  | CGL2_11068066  | Conserved protein of unknown function                   | 80  | complement(77029..77268)   | 2_GENE_65  |
| 11068     | 65  | CGL2_11068065  | Putative molybdopterin biosynthesis protein             | 267 | complement(76201..77001)   | 2_GENE_64  |
| 11068     | 64  | CGL2_11068064  | Conserved protein of unknown function                   | 142 | complement(75773..76198)   | 2_GENE_63  |
| 11068     | 63  | CGL2_11068063  | Putative two component transcriptional regulator, wi    | 231 | complement(75078..75770)   | 2_GENE_62  |
| 11068     | 62  | CGL2_11068062  | Putative multi-sensor signal transduction histidine kii | 453 | complement(73706..75064)   | 2_GENE_61  |
| 11068     | 61  | CGL2_11068061  | UDP-glucose 4-epimerase (EC 5.1.3.2)                    | 323 | 72739..73707               | 2_GENE_60  |

|       |    |               |                                                     |      |                          |           |
|-------|----|---------------|-----------------------------------------------------|------|--------------------------|-----------|
| 11068 | 60 | CGL2_11068060 | Apurinic endonuclease (APN1) (EC 3.1.21.2)          | 318  | complement(71466..72419) | 2_GENE_59 |
| 11068 | 59 | CGL2_11068059 | Probable ABC transporter, permease                  | 251  | complement(70688..71440) | 2_GENE_58 |
| 11068 | 58 | CGL2_11068058 | ABC transporter, ATP-binding protein (EC 3.6.3.25)  | 240  | complement(69969..70688) | 2_GENE_57 |
| 11068 | 57 | CGL2_11068057 | Conserved protein of unknown function               | 325  | complement(68948..69922) | 2_GENE_56 |
| 11068 | 56 | CGL2_11068056 | Putative metallophosphoesterase                     | 385  | complement(67767..68921) | 2_GENE_55 |
| 11068 | 55 | CGL2_11068055 | Protein of unknown function                         | 226  | 66933..67610             | 2_GENE_54 |
| 11068 | 54 | CGL2_11068054 | Diguanylate cyclase/phosphodiesterase with PAS/PAC  | 1139 | 63393..66809             | 2_GENE_53 |
| 11068 | 53 | CGL2_11068053 | 4-hydroxythreonine-4-phosphate dehydrogenase (EC    | 344  | 61971..63002             | 2_GENE_52 |
| 11068 | 52 | CGL2_11068052 | Cation efflux system protein                        | 302  | 61091..61996             | 2_GENE_51 |
| 11068 | 51 | CGL2_11068051 | Excinuclease ABC, A subunit (UvrA)                  | 935  | 58287..61091             | 2_GENE_50 |
| 11068 | 50 | CGL2_11068050 | Probable outer membrane lipoprotein carrier protein | 238  | 57571..58284             | 2_GENE_49 |
| 11068 | 49 | CGL2_11068049 | Putative cell division protein (FtsK)               | 758  | 55308..57581             | 2_GENE_48 |
| 11068 | 48 | CGL2_11068048 | Metallo-beta-lactamase family protein               | 562  | 53608..55293             | 2_GENE_47 |
| 11068 | 47 | CGL2_11068047 | Putative dimethyladenosine transferase              | 256  | 52841..53608             | 2_GENE_46 |
| 11068 | 46 | CGL2_11068046 | Putative TonB protein                               | 367  | complement(51509..52609) | 2_GENE_45 |
| 11068 | 45 | CGL2_11068045 | Putative lytic transglycosylase                     | 686  | complement(49462..51519) | 2_GENE_44 |
| 11068 | 44 | CGL2_11068044 | Protein of unknown function                         | 91   | complement(49181..49453) | 2_GENE_43 |
| 11068 | 43 | CGL2_11068043 | Protein of unknown function                         | 111  | complement(48865..49197) | 2_GENE_42 |
| 11068 | 42 | CGL2_11068042 | Probable ATPase, AAA family                         | 444  | complement(47299..48630) | 2_GENE_41 |
| 11068 | 41 | CGL2_11068041 | Metal dependent phosphohydrolase                    | 521  | complement(45531..47093) | 2_GENE_40 |
| 11068 | 40 | CGL2_11068040 | Conserved protein of unknown function               | 284  | complement(44696..45547) | 2_GENE_39 |
| 11068 | 39 | CGL2_11068039 | Exodeoxyribonuclease VII large subunit (EC 3.1.11.6 | 503  | complement(43181..44689) | 2_GENE_38 |
| 11068 | 38 | CGL2_11068038 | Exodeoxyribonuclease VII small subunit              | 97   | complement(42885..43175) | 2_GENE_37 |
| 11068 | 37 | CGL2_11068037 | Geranyltranstransferase (EC 2.5.1.10)               | 303  | complement(41932..42840) | 2_GENE_36 |
| 11068 | 36 | CGL2_11068036 | Deoxyxylulose-5-phosphate synthase (EC 2.2.1.7)     | 630  | complement(40040..41929) | 2_GENE_35 |
| 11068 | 35 | CGL2_11068035 | Hemolysin A                                         | 251  | complement(39265..40017) | 2_GENE_34 |
| 11068 | 34 | CGL2_11068034 | DTDP-glucose 4,6-dehydratase (EC 4.2.1.46)          | 313  | complement(38317..39255) | 2_GENE_33 |
| 11068 | 33 | CGL2_11068033 | Putative divalent-cation tolerance protein (CutA)   | 113  | complement(37979..38317) | 2_GENE_32 |
| 11068 | 32 | CGL2_11068032 | Putative peptidase, M23B family                     | 316  | complement(37032..37979) | 2_GENE_31 |
| 11068 | 31 | CGL2_11068031 | Preprotein translocase SecA subunit                 | 908  | complement(34290..37013) | 2_GENE_30 |
| 11068 | 30 | CGL2_11068030 | Putative NADH dehydrogenase (ubiquinone), subunit   | 123  | complement(33727..34095) | 2_GENE_29 |
| 11068 | 29 | CGL2_11068029 | NADH dehydrogenase (ubiquinone), B subunit (EC 1.   | 178  | complement(33200..33733) | 2_GENE_28 |
| 11068 | 28 | CGL2_11068028 | NADH dehydrogenase (quinone), chain C (EC 1.6.99.   | 184  | complement(32639..33190) | 2_GENE_27 |
| 11068 | 27 | CGL2_11068027 | NADH dehydrogenase (ubiquinone), D subunit (EC 1.   | 423  | complement(31307..32575) | 2_GENE_26 |
| 11068 | 26 | CGL2_11068026 | Putative NADH dehydrogenase (ubiquinone), E subur   | 168  | complement(30653..31156) | 2_GENE_25 |
| 11068 | 25 | CGL2_11068025 | NADH dehydrogenase (quinone) (EC 1.6.99.5)          | 617  | complement(28689..30539) | 2_GENE_24 |
| 11068 | 24 | CGL2_11068024 | NADH dehydrogenase (quinone), chain G (EC 1.6.99    | 903  | complement(25957..28665) | 2_GENE_23 |
| 11068 | 23 | CGL2_11068023 | NADH dehydrogenase (ubiquinone), H subunit          | 337  | complement(24865..25875) | 2_GENE_22 |
| 11068 | 22 | CGL2_11068022 | NADH dehydrogenase, chain I (EC 1.6.99.3)           | 186  | complement(24279..24836) | 2_GENE_21 |
| 11068 | 21 | CGL2_11068021 | Putative NADH dehydrogenase (ubiquinone), chain J   | 169  | complement(23761..24267) | 2_GENE_20 |
| 11068 | 20 | CGL2_11068020 | Putative NADH dehydrogenase (ubiquinone), chain 4   | 100  | complement(23399..23698) | 2_GENE_19 |

|           |     |                |                                                    |      |                            |             |
|-----------|-----|----------------|----------------------------------------------------|------|----------------------------|-------------|
| 11068     | 19  | CGL2_11068019  | NADH dehydrogenase (quinone), chain L (EC 1.6.99.  | 639  | complement(21455..23371)   | 2_GENE_18   |
| 11068     | 18  | CGL2_11068018  | NADH dehydrogenase (quinone), chain M (EC 1.6.99   | 500  | complement(19910..21409)   | 2_GENE_17   |
| 11068     | 17  | CGL2_11068017  | NADH dehydrogenase (quinone), chain N (EC 1.6.99   | 481  | complement(18424..19866)   | 2_GENE_16   |
| 11068     | 16  | CGL2_11068016  | LexA repressor (EC 3.4.21.88)                      | 222  | complement(17729..18394)   | 2_GENE_15   |
| 11068     | 15  | CGL2_11068015  | Conserved protein of unknown function              | 156  | complement(17268..17735)   | 2_GENE_14   |
| 11068     | 14  | CGL2_11068014  | Ammonium transporter                               | 505  | complement(15508..17022)   | 2_GENE_13   |
| 11068     | 13  | CGL2_11068013  | Putative nitrogen regulatory protein P-II          | 112  | complement(15173..15508)   | 2_GENE_12   |
| 11068     | 12  | CGL2_11068012  | Putative helicase, Snf2 family                     | 1049 | complement(11956..15102)   | 2_GENE_11   |
| 11068     | 11  | CGL2_11068011  | Probable proline dehydrogenase                     | 270  | complement(11116..11925)   | 2_GENE_10   |
| 11068     | 10  | CGL2_11068010  | Conserved protein of unknown function              | 80   | 10838..11077               | 2_GENE_9    |
| 11068     | 9   | CGL2_11068009  | Transposase                                        | 479  | complement(9122..10558)    | 2_GENE_8    |
| 11068     | 8   | CGL2_11068008  | Hypothetical protein                               | 157  | complement(8533..9003)     | 2_GENE_7    |
| 11068     | 7   | CGL2_11068007  | Diguanylate cyclase/phosphodiesterase with PAS/PA  | 1035 | 5408..8512                 | 2_GENE_6    |
| 11068     | 5   | CGL2_11068005  | Conserved protein of unknown function              | 346  | 4239..5276                 | 2_GENE_5    |
| 11068     | 4   | CGL2_11068004  | Protein of unknown function                        | 215  | 3508..4152                 | 2_GENE_4    |
| 11068     | 3   | CGL2_11068003  | Conserved hypothetical protein                     | 499  | 1968..3464                 | 2_GENE_3    |
| 11068     | 2   | CGL2_11068002  | Putative TPR domain containing protein             | 125  | 1594..1968                 | 2_GENE_2    |
| 11068     | 1   | CGL2_11068001  | Diguanylate cyclase                                | 393  | complement(266..1444)      | 2_GENE_1    |
| 10822     | 1   | CGL2_10822001  | Putative TPR domain containing protein             | 204  | complement(826..1437)      | 186_GENE_13 |
| 10822     | 2   | CGL2_10822002  | Putative general secretion pathway protein K       | 346  | complement(1542..2579)     | 186_GENE_11 |
| 10822     | 3   | CGL2_10822003  | Hypothetical protein                               | 196  | complement(2557..3144)     | 186_GENE_10 |
| 10822     | 4   | CGL2_10822004  | Protein of unknown function                        | 452  | complement(3140..4495)     | 186_GENE_9  |
| 10822     | 5   | CGL2_10822005  | Protein of unknown function                        | 290  | complement(4506..5375)     | 186_GENE_8  |
| 10822     | 6   | CGL2_10822006  | General secretion pathway protein G                | 159  | complement(5553..6029)     | 186_GENE_7  |
| 10822     | 7   | CGL2_10822007  | Putative general secretion pathway protein F       | 400  | complement(6067..7266)     | 186_GENE_6  |
| 10822     | 8   | CGL2_10822008  | General secretion pathway protein E                | 571  | complement(7290..9002)     | 186_GENE_5  |
| 10822     | 9   | CGL2_10822009  | Putative general secretion pathway protein D       | 555  | complement(9010..10674)    | 186_GENE_4  |
| 10822     | 10  | CGL2_10822010  | Probable general secretion pathway protein C       | 323  | complement(10674..11642)   | 186_GENE_3  |
| 10822     | 11  | CGL2_10822011  | Thiamine biosynthesis protein (ThiS)               | 70   | 11796..12005               | 186_GENE_2  |
| 10822tRNA |     | CGL2_10822R001 | TRNA Gly CCC                                       |      | 12087..12161               |             |
| 10822     | 14  | CGL2_10822014  | Hypothetical protein                               | 97   | complement(12331..12621)   | 710_GENE_6  |
| 10822     | 17  | CGL2_10822017  | replication protein A                              | 455  | 12952..14316               | 710_GENE_3  |
| 10822     | 18  | CGL2_10822018  | replication protein C                              | 335  | 14270..15274               | 710_GENE_2  |
| 10822     | 19  | CGL2_10822019  | Hypothetical protein                               | 44   | 15252..15383               | 710_GENE_1  |
| 8970      | 2   | CGL2_08970002  | Probable cytochrome C, class I                     | 269  | 1992..2798                 | 46_GENE_28  |
| 8970      | 1   | CGL2_08970001  | Probable cytochrome C, class I                     | 269  | 1118..1924                 | 46_GENE_27  |
| 11238     | 109 | CGL2_11238109  | Probable cytochrome C, class I                     | 225  | 118679..119353             | 46_GENE_26  |
| 11238     | 108 | CGL2_11238108  | Diguanylate cyclase/phosphodiesterase with GAF ser | 988  | 115484..118447             | 46_GENE_25  |
| 11238     | 107 | CGL2_11238107  | Conserved hypothetical protein                     | 173  | complement(114772..115290) | 46_GENE_24  |
| 11238     | 106 | CGL2_11238106  | Probable phytoene dehydrogenase                    | 496  | 113294..114781             | 46_GENE_23  |
| 11238     | 105 | CGL2_11238105  | Hypothetical protein                               | 351  | 112205..113257             | 46_GENE_22  |

|       |     |               |                                                       |      |                            |            |
|-------|-----|---------------|-------------------------------------------------------|------|----------------------------|------------|
| 11238 | 104 | CGL2_11238104 | Protein of unknown function                           | 556  | 110490..112157             | 46_GENE_21 |
| 11238 | 103 | CGL2_11238103 | Probable cellulose synthase subunit C                 | 335  | 109270..110274             | 46_GENE_20 |
| 11238 | 102 | CGL2_11238102 | Probable cellulose synthase regulatory subunit        | 755  | 107006..109270             | 46_GENE_19 |
| 11238 | 101 | CGL2_11238101 | Cellulose synthase catalytic subunit (UDP-forming) (I | 714  | 104865..107006             | 46_GENE_18 |
| 11238 | 100 | CGL2_11238100 | Putative cytochrome C, class I                        | 223  | complement(103674..104342) | 46_GENE_17 |
| 11238 | 99  | CGL2_11238099 | Putative cytochrome C, class I                        | 272  | complement(102794..103609) | 46_GENE_16 |
| 11238 | 98  | CGL2_11238098 | DNA polymerase family B                               | 736  | 100584..102791             | 46_GENE_15 |
| 11238 | 97  | CGL2_11238097 | Conserved hypothetical protein                        | 87   | 100346..100606             | 46_GENE_14 |
| 11238 | 96  | CGL2_11238096 | Hypothetical protein                                  | 179  | 99807..100343              | 46_GENE_13 |
| 11238 | 95  | CGL2_11238095 | LexA repressor (EC 3.4.21.88)                         | 205  | 99187..99801               | 46_GENE_12 |
| 11238 | 94  | CGL2_11238094 | Glucose-6-phosphate isomerase (EC 5.3.1.9)            | 548  | 97426..99069               | 46_GENE_11 |
| 11238 | 93  | CGL2_11238093 | Conserved protein of unknown function                 | 238  | 96657..97370               | 46_GENE_10 |
| 11238 | 92  | CGL2_11238092 | Hypothetical protein                                  | 125  | 96254..96628               | 46_GENE_7a |
| 11238 | 91  | CGL2_11238091 | Putative acriflavin resistance protein                | 1036 | 92842..95949               | 46_GENE_7  |
| 11238 | 90  | CGL2_11238090 | Protein of unknown function                           | 211  | 92089..92721               | 46_GENE_6  |
| 11238 | 89  | CGL2_11238089 | Protein of unknown function                           | 200  | 91251..91850               | 46_GENE_5  |
| 11238 | 88  | CGL2_11238088 | Protein of unknown function                           | 103  | 90729..91037               | 46_GENE_4  |
| 11238 | 87  | CGL2_11238087 | Arsenical pump membrane protein                       | 439  | 89215..90531               | 46_GENE_3  |
| 11238 | 86  | CGL2_11238086 | Putative transcriptional regulator, ArsR family       | 269  | 88402..89208               | 46_GENE_2  |
| 11238 | 84  | CGL2_11238084 | transposase                                           | 479  | 86625..88061               | 297_GENE_3 |
| 11238 | 83  | CGL2_11238083 | Protein of unknown function                           | 168  | 86040..86543               | 297_GENE_4 |
| 11238 | 82  | CGL2_11238082 | Protein of unknown function                           | 231  | complement(85079..85771)   | 297_GENE_5 |
| 11238 | 81  | CGL2_11238081 | Putative Kelch domain-containing protein              | 392  | 83931..85106               | 297_GENE_6 |
| 11238 | 80  | CGL2_11238080 | Conserved hypothetical protein                        | 125  | 83020..83394               | 297_GENE_7 |
| 11238 | 79  | CGL2_11238079 | Putative iron permease, FTR1 family                   | 292  | 82145..83020               | 297_GENE_8 |
| 11238 | 78  | CGL2_11238078 | Putative metallo-beta-lactamase family protein        | 479  | complement(80493..81929)   | 66_GENE_28 |
| 11238 | 77  | CGL2_11238077 | Long-chain-fatty-acid--CoA ligase (EC 6.2.1.3)        | 900  | complement(77771..80470)   | 66_GENE_27 |
| 11238 | 76  | CGL2_11238076 | Hypothetical protein                                  | 209  | 77156..77782               | 66_GENE_26 |
| 11238 | 75  | CGL2_11238075 | Transcriptional regulator, BadM/Rrf2 family           | 169  | complement(76403..76909)   | 66_GENE_24 |
| 11238 | 74  | CGL2_11238074 | Conserved hypothetical protein                        | 76   | complement(76132..76359)   | 66_GENE_23 |
| 11238 | 73  | CGL2_11238073 | Probable oxidoreductase FAD/NAD(P)-binding            | 248  | 75285..76028               | 66_GENE_22 |
| 11238 | 72  | CGL2_11238072 | Putative cytochrome c                                 | 120  | complement(74647..75006)   | 66_GENE_21 |
| 11238 | 71  | CGL2_11238071 | Conserved protein of unknown function                 | 64   | complement(74338..74529)   | 66_GENE_20 |
| 11238 | 70  | CGL2_11238070 | Putative flavohemoprotein                             | 133  | 73794..74192               | 66_GENE_19 |
| 11238 | 69  | CGL2_11238069 | Phosphomannomutase (EC 5.4.2.8)                       | 467  | 72203..73603               | 66_GENE_18 |
| 11238 | 68  | CGL2_11238068 | Mannose-1-phosphate guanylyltransferase (EC 2.7.7     | 491  | 70731..72203               | 66_GENE_17 |
| 11238 | 67  | CGL2_11238067 | Hypothetical protein                                  | 90   | complement(69993..70262)   | 66_GENE_15 |
| 11238 | 66  | CGL2_11238066 | Protein of unknown function                           | 245  | complement(69190..69924)   | 66_GENE_14 |
| 11238 | 65  | CGL2_11238065 | Putative short-chain dehydrogenase                    | 277  | 68334..69164               | 66_GENE_13 |
| 11238 | 64  | CGL2_11238064 | GTP-binding protein (Era)                             | 312  | complement(67283..68218)   | 66_GENE_12 |
| 11238 | 63  | CGL2_11238063 | Recombination protein O (RecO)                        | 246  | complement(66530..67267)   | 66_GENE_11 |

|           |    |                |                                                       |      |                          |             |
|-----------|----|----------------|-------------------------------------------------------|------|--------------------------|-------------|
| 11238     | 62 | CGL2_11238062  | Hypothetical protein                                  | 191  | 65903..66475             | 66_GENE_10  |
| 11238     | 61 | CGL2_11238061  | Protein of unknown function                           | 332  | 64620..65615             | 66_GENE_9   |
| 11238     | 60 | CGL2_11238060  | Conserved protein of unknown function                 | 391  | complement(63115..64287) | 66_GENE_8   |
| 11238     | 59 | CGL2_11238059  | GTP-binding protein (TypA)                            | 623  | complement(61090..62958) | 66_GENE_7   |
| 11238     | 58 | CGL2_11238058  | Peptidyl-prolyl cis-trans isomerase (EC 5.2.1.8)      | 218  | complement(60423..61076) | 66_GENE_6   |
| 11238     | 57 | CGL2_11238057  | Putative metallo-beta-lactamase family protein        | 262  | complement(59570..60355) | 66_GENE_5   |
| 11238     | 56 | CGL2_11238056  | 5-methyltetrahydrofolate--homocysteine methyltran:    | 815  | 57123..59567             | 66_GENE_4   |
| 11238     | 55 | CGL2_11238055  | Conserved protein of unknown function                 | 282  | 56278..57123             | 66_GENE_3   |
| 11238     | 54 | CGL2_11238054  | Thiamine biosynthesis protein (ThiC)                  | 468  | 54838..56241             | 134_GENE_2  |
| 11238     | 53 | CGL2_11238053  | Probable ATP-dependent Clp protease                   | 1026 | 51541..54618             | 134_GENE_3  |
| 11238     | 52 | CGL2_11238052  | Excinuclease ABC, C subunit (UvrC)                    | 632  | 49646..51541             | 134_GENE_4  |
| 11238     | 51 | CGL2_11238051  | Hypothetical protein                                  | 84   | complement(49298..49549) | 134_GENE_5  |
| 11238     | 50 | CGL2_11238050  | Shikimate 5-dehydrogenase (EC 1.1.1.25)               | 290  | complement(48387..49256) | 134_GENE_6  |
| 11238     | 49 | CGL2_11238049  | Cell division protein (FtsY)                          | 309  | 47434..48360             | 134_GENE_7  |
| 11238     | 48 | CGL2_11238048  | Conserved protein of unknown function                 | 169  | 46893..47399             | 134_GENE_8  |
| 11238     | 47 | CGL2_11238047  | Metal dependent phosphohydrolase                      | 501  | 45398..46900             | 134_GENE_9  |
| 11238     | 46 | CGL2_11238046  | Putative phosphate starvation-inducible protein (Pho  | 331  | 44374..45366             | 134_GENE_10 |
| 11238     | 45 | CGL2_11238045  | Probable universal stress protein (UspA)              | 178  | 43838..44371             | 134_GENE_11 |
| 11238     | 44 | CGL2_11238044  | Putative type IV prepilin peptidase                   | 263  | 42887..43675             | 410_GENE_2  |
| 11238     | 43 | CGL2_11238043  | Protein of unknown function                           | 105  | 42412..42726             | 410_GENE_3  |
| 11238     | 42 | CGL2_11238042  | Putative polyphosphate kinase (PPK2)                  | 275  | 41539..42363             | 410_GENE_4  |
| 11238     | 41 | CGL2_11238041  | Probable oxidoreductase                               | 254  | 40731..41492             | 410_GENE_5  |
| 11238tRNA |    | CGL2_11238R001 | TRNA Thr TGT                                          |      | complement(40186..40261) |             |
| 11238     | 40 | CGL2_11238040  | Putative response regulator receiver protein          | 326  | complement(38975..39952) | 410_GENE_6  |
| 11238     | 39 | CGL2_11238039  | Conserved protein of unknown function                 | 200  | complement(38170..38769) | 410_GENE_7  |
| 11238     | 38 | CGL2_11238038  | Protein of unknown function                           | 74   | complement(37914..38135) | 410_GENE_8  |
| 11238     | 37 | CGL2_11238037  | Conserved protein of unknown function                 | 167  | complement(37308..37808) | 467_GENE_5a |
| 11238     | 36 | CGL2_11238036  | Transcription termination factor (NusA)               | 452  | complement(35915..37270) | 467_GENE_5  |
| 11238     | 35 | CGL2_11238035  | Translation initiation factor IF-2                    | 874  | complement(33257..35878) | 467_GENE_4  |
| 11238     | 34 | CGL2_11238034  | Conserved protein of unknown function                 | 99   | complement(32938..33234) | 467_GENE_3  |
| 11238     | 33 | CGL2_11238033  | Probable ribosome-binding factor A                    | 131  | complement(32543..32935) | 467_GENE_2  |
| 11238     | 32 | CGL2_11238032  | TRNA pseudouridine synthase B (EC 4.2.1.70)           | 325  | complement(31569..32543) | 467_GENE_1  |
| 11238     | 31 | CGL2_11238031  | Ribosomal protein S15                                 | 89   | complement(31242..31508) | 71_GENE_25  |
| 11238     | 30 | CGL2_11238030  | Polyribonucleotide nucleotidyltransferase (EC 2.7.7.8 | 713  | complement(28969..31107) | 71_GENE_24  |
| 11238     | 29 | CGL2_11238029  | Hypothetical protein                                  | 39   | complement(28811..28927) | 71_GENE_23  |
| 11238     | 28 | CGL2_11238028  | Processing peptidase (EC 3.4.24.64)                   | 411  | complement(27357..28589) | 71_GENE_22  |
| 11238     | 27 | CGL2_11238027  | Putative pyridoxal phosphate biosynthesis protein     | 255  | complement(26593..27357) | 71_GENE_21  |
| 11238     | 26 | CGL2_11238026  | Holo-[acyl-carrier-protein] synthase (EC 2.7.8.7)     | 133  | complement(26195..26593) | 71_GENE_20  |
| 11238     | 25 | CGL2_11238025  | Carbohydrate kinase family protein                    | 518  | complement(24642..26195) | 71_GENE_19  |
| 11238     | 24 | CGL2_11238024  | Uracil-DNA glycosylase, family 4                      | 245  | complement(23835..24569) | 71_GENE_18  |
| 11238     | 23 | CGL2_11238023  | Hypothetical protein                                  | 85   | complement(23581..23835) | 71_GENE_17  |

|       |    |               |                                                     |      |                          |             |
|-------|----|---------------|-----------------------------------------------------|------|--------------------------|-------------|
| 11238 | 22 | CGL2_11238022 | DNA mismatch repair protein (MutS)                  | 843  | complement(21057..23585) | 71_GENE_16  |
| 11238 | 21 | CGL2_11238021 | Protein of unknown function                         | 381  | complement(19796..20938) | 71_GENE_15  |
| 11238 | 20 | CGL2_11238020 | Protein of unknown function                         | 390  | complement(18605..19774) | 71_GENE_14  |
| 11238 | 19 | CGL2_11238019 | Enoyl-(Acyl-carrier-protein) reductase (EC 1.3.1.9) | 265  | complement(17770..18564) | 71_GENE_13  |
| 11238 | 18 | CGL2_11238018 | Probable rieske iron-sulfur family protein          | 309  | complement(16788..17714) | 71_GENE_12  |
| 11238 | 17 | CGL2_11238017 | Putative cytochrome b/b6, N-terminal                | 459  | complement(15390..16766) | 71_GENE_11  |
| 11238 | 16 | CGL2_11238016 | Probable thioredoxin                                | 83   | 15106..15354             | 71_GENE_10  |
| 11238 | 15 | CGL2_11238015 | Hypothetical protein                                | 62   | complement(14770..14955) | 71_GENE_8a  |
| 11238 | 14 | CGL2_11238014 | Endoribonuclease L-PSP                              | 128  | complement(14394..14777) | 71_GENE_8   |
| 11238 | 13 | CGL2_11238013 | Ribosomal protein L28                               | 63   | 14158..14346             | 71_GENE_7a  |
| 11238 | 12 | CGL2_11238012 | Putative ATP-dependent DNA helicase (RecG)          | 713  | complement(11869..14007) | 71_GENE_7   |
| 11238 | 11 | CGL2_11238011 | Protein of unknown function                         | 119  | complement(11528..11884) | 71_GENE_6   |
| 11238 | 10 | CGL2_11238010 | Ppx/GppA phosphatase (EC 3.6.1.11)                  | 315  | complement(10578..11522) | 71_GENE_5   |
| 11238 | 9  | CGL2_11238009 | Protein of unknown function                         | 587  | 8839..10599              | 71_GENE_4   |
| 11238 | 8  | CGL2_11238008 | Putative polyA polymerase family protein            | 419  | complement(7472..8728)   | 71_GENE_3   |
| 11238 | 7  | CGL2_11238007 | Protein of unknown function                         | 166  | 6882..7379               | 71_GENE_2   |
| 11238 | 6  | CGL2_11238006 | Putative acriflavin resistance protein              | 1027 | complement(3665..6745)   | 428_GENE_7  |
| 11238 | 5  | CGL2_11238005 | Protein of unknown function                         | 206  | complement(2986..3603)   | 428_GENE_6  |
| 11238 | 4  | CGL2_11238004 | Putative ferric uptake regulator, Fur family        | 146  | complement(2468..2905)   | 428_GENE_5  |
| 11238 | 3  | CGL2_11238003 | Protein of unknown function                         | 154  | complement(1923..2384)   | 428_GENE_3  |
| 11238 | 2  | CGL2_11238002 | Conserved protein of unknown function               | 261  | 1114..1896               | 428_GENE_2  |
| 11238 | 1  | CGL2_11238001 | Protein of unknown function                         | 305  | 186..1100                | 428_GENE_1  |
| 10665 | 1  | CGL2_10665001 | Ribosomal protein S1                                | 591  | 23..1795                 | 274_GENE_1  |
| 10665 | 2  | CGL2_10665002 | Peptidase S49 (SppA)                                | 295  | 1859..2743               | 274_GENE_2  |
| 10665 | 3  | CGL2_10665003 | Putative integration host factor, beta-subunit      | 98   | 2772..3065               | 274_GENE_2a |
| 10665 | 4  | CGL2_10665004 | Signal recognition particle protein                 | 444  | 3068..4399               | 274_GENE_3  |
| 10665 | 5  | CGL2_10665005 | Ribosomal protein S16                               | 81   | 4448..4690               | 274_GENE_4  |
| 10665 | 6  | CGL2_10665006 | Conserved protein of unknown function               | 76   | 4741..4968               | 274_GENE_5  |
| 10665 | 7  | CGL2_10665007 | Hypothetical protein                                | 108  | 5199..5522               | 274_GENE_5a |
| 10665 | 8  | CGL2_10665008 | tRNA (guanine-N(1)-)-methyltransferase (EC 2.1.1.3  | 241  | 5495..6217               | 274_GENE_6  |
| 10665 | 9  | CGL2_10665009 | Ribosomal protein L19                               | 118  | 6286..6639               | 274_GENE_7  |
| 10665 | 10 | CGL2_10665010 | Ribonuclease HII (EC 3.1.26.4)                      | 228  | 6656..7339               | 274_GENE_8  |
| 10665 | 11 | CGL2_10665011 | Hypothetical protein                                | 301  | 7352..8254               | 274_GENE_9  |
| 10665 | 12 | CGL2_10665012 | Putative peptidase M23B family protein              | 398  | 8227..9420               | 274_GENE_10 |
|       |    |               |                                                     |      |                          |             |
| 10776 | 10 | CGL2_10776010 | Chaperonin GroEL                                    | 204  | complement(11391..12002) |             |
| 10776 | 9  | CGL2_10776009 | Thioredoxin                                         | 110  | complement(10919..11248) | 222_GENE_9  |
| 10776 | 8  | CGL2_10776008 | Putative DNA repair protein (RecN)                  | 564  | complement(9089..10780)  | 222_GENE_7  |
| 10776 | 7  | CGL2_10776007 | Conserved protein of unknown function               | 915  | 6268..9012               | 222_GENE_6  |
| 10776 | 6  | CGL2_10776006 | Arginine decarboxylase (EC 4.1.1.19)                | 489  | 4753..6219               | 222_GENE_5  |
| 10776 | 5  | CGL2_10776005 | Spermidine synthase (EC 2.5.1.16)                   | 306  | 3821..4738               | 222_GENE_4  |

|           |    |                |                                                      |      |                          |            |
|-----------|----|----------------|------------------------------------------------------|------|--------------------------|------------|
| 10776     | 4  | CGL2_10776004  | Putative S-adenosylmethionine decarboxylase          | 154  | 3391..3852               | 222_GENE_3 |
| 10776     | 3  | CGL2_10776003  | Diguanylate cyclase                                  | 740  | 830..3049                | 222_GENE_2 |
| 10776     | 2  | CGL2_10776002  | Protein of unknown function                          | 183  | 81..629                  | 222_GENE_1 |
| 10933     | 1  | CGL2_10933001  | Protein of unknown function                          | 247  | 456..1196                | 44_GENE_1  |
| 10933     | 2  | CGL2_10933002  | Putative phosphatidylglycerophosphatase A            | 180  | 1186..1725               | 44_GENE_2  |
| 10933     | 3  | CGL2_10933003  | RecA protein                                         | 360  | 1837..2916               | 44_GENE_3  |
| 10933     | 4  | CGL2_10933004  | Alanyl-tRNA synthetase (EC 6.1.1.7)                  | 891  | 3000..5672               | 44_GENE_4  |
| 10933     | 5  | CGL2_10933005  | Protein of unknown function                          | 94   | 5672..5953               | 44_GENE_5  |
| 10933     | 6  | CGL2_10933006  | Putative holliday junction resolvase YqgF            | 171  | 5973..6485               | 44_GENE_6  |
| 10933     | 7  | CGL2_10933007  | Aminodeoxychorismate lyase                           | 341  | 6517..7539               | 44_GENE_7  |
| 10933     | 8  | CGL2_10933008  | Valyl-tRNA synthetase (EC 6.1.1.9)                   | 904  | 7571..10282              | 44_GENE_8  |
| 10933     | 9  | CGL2_10933009  | Nicotinate-nucleotide pyrophosphorylase (EC 2.4.2.1) | 292  | 10282..11157             | 44_GENE_9  |
| 10933     | 10 | CGL2_10933010  | Biotin--acetyl-CoA-carboxylase ligase                | 255  | 11157..11921             | 44_GENE_10 |
| 10933     | 11 | CGL2_10933011  | Transcriptional activator, Baf family                | 259  | 11921..12697             | 44_GENE_11 |
| 10933     | 12 | CGL2_10933012  | Hypothetical protein                                 | 60   | complement(12739..12918) | 44_GENE_12 |
| 10933     | 13 | CGL2_10933013  | Diguanylate cyclase/phosphodiesterase with PAS/PAC   | 1449 | complement(12985..17331) | 44_GENE_13 |
| 10933     | 13 | CGL2_10933013  | PAS/PAC sensor protein                               | 1449 | complement(12985..17331) | 44_GENE_13 |
| 10933     | 15 | CGL2_10933015  | check gene                                           | 91   | complement(18072..18344) | 44_GENE_14 |
| 10933     | 16 | CGL2_10933016  | Probable secretion protein (HlyD)                    | 329  | 18642..19628             | 44_GENE_15 |
| 10933     | 17 | CGL2_10933017  | Putative outer membrane efflux protein               | 417  | 19748..20998             | 44_GENE_16 |
| 10933     | 18 | CGL2_10933018  | Malate dehydrogenase (EC 1.1.1.27)                   | 320  | 21209..22168             | 44_GENE_17 |
| 10933     | 19 | CGL2_10933019  | Protein of unknown function                          | 195  | 22249..22833             | 44_GENE_18 |
| 10933     | 20 | CGL2_10933020  | Protein of unknown function                          | 209  | 22826..23452             | 44_GENE_19 |
| 10933     | 21 | CGL2_10933021  | ABC transporter, ATP-binding protein (EC 3.6.3.25)   | 248  | 23460..24203             | 44_GENE_20 |
| 10933     | 22 | CGL2_10933022  | RNA polymerase, sigma 54 subunit, RpoN               | 486  | 24203..25660             | 44_GENE_21 |
| 10933     | 23 | CGL2_10933023  | Sigma 54 modulation protein/ribosomal protein S30E   | 176  | 25707..26234             | 44_GENE_22 |
| 10933     | 24 | CGL2_10933024  | Putative P-loop ATPase protein family                | 288  | 26262..27125             | 44_GENE_23 |
| 10933     | 25 | CGL2_10933025  | Protein of unknown function                          | 195  | 27128..27712             | 44_GENE_24 |
| 10933     | 26 | CGL2_10933026  | Chorismate synthase (EC 4.2.3.5)                     | 401  | 27752..28954             | 44_GENE_25 |
| 10933     | 27 | CGL2_10933027  | Shikimate kinase (EC 2.7.1.71)                       | 183  | 28947..29495             | 44_GENE_26 |
| 10933     | 28 | CGL2_10933028  | 3-dehydroquinate synthetase (EC 4.2.3.4)             | 364  | 29535..30626             | 44_GENE_27 |
| 10933     | 29 | CGL2_10933029  | Putative GAF sensor protein                          | 421  | 30658..31920             | 44_GENE_28 |
| 10933     | 30 | CGL2_10933030  | Hypothetical protein                                 | 123  | 31966..32334             | 44_GENE_29 |
| 10933     | 31 | CGL2_10933031  | Conserved protein of unknown function                | 260  | 32340..33119             | 44_GENE_30 |
| 10933     | 32 | CGL2_10933032  | Probable acetyltransferase                           | 134  | 33160..33561             | 44_GENE_31 |
| 10933     | 33 | CGL2_10933033  | Putative GTP cyclohydrolase I                        | 149  | complement(33626..34072) | 44_GENE_32 |
| 10933     | 34 | CGL2_10933034  | transposase                                          | 173  | 34165..34683             | 44_GENE_33 |
| 10933tRNA |    | CGL2_10933R001 | TRNA Val TAC                                         |      | complement(34822..34897) |            |
| 10933     | 35 | CGL2_10933035  | 4-hydroxybenzoyl-CoA thioesterase                    | 148  | complement(34891..35334) | 44_GENE_34 |
| 10933tRNA |    | CGL2_10933R002 | TRNA Asp GTC                                         |      | 35492..35568             |            |
| 10933     | 36 | CGL2_10933036  | Putative MotA/TolQ/ExbB proton channel               | 223  | 35891..36559             | 96_GENE_3  |

|           |      |                     |                                                    |                     |                            |             |
|-----------|------|---------------------|----------------------------------------------------|---------------------|----------------------------|-------------|
| 10933     | 37   | CGL2_10933037       | Putative biopolymer transport protein ExbD/TolR    | 148                 | 36550..36993               | 96_GENE_4   |
| 10933     | 38   | CGL2_10933038       | Probable TonB family protein                       | 278                 | 37003..37836               | 96_GENE_5   |
| 10933     | 39   | CGL2_10933039       | Putative TolB protein                              | 447                 | 37829..39169               | 96_GENE_6   |
| 10933     | 40   | CGL2_10933040       | Putative TPR-domain containing protein             | 274                 | 39214..40035               | 96_GENE_7   |
| 10933     | 41   | CGL2_10933041       | DNA mismatch repair protein MutL                   | 634                 | 40102..42003               | 96_GENE_8   |
| 10933     | 42   | CGL2_10933042       | tRNA delta(2)-isopentenylpyrophosphate transferase | 294                 | 41988..42869               | 96_GENE_9   |
| 10933     | 43   | CGL2_10933043       | Methylthioadenosine phosphorylase (EC 2.4.2.28)    | 300                 | 43012..43911               | 96_GENE_10  |
| 10933     | 44   | CGL2_10933044       | Putative carbohydrate kinase, PfkB family          | 313                 | 43940..44878               | 96_GENE_11  |
| 10933     | 45   | CGL2_10933045       | Putative TPR-domain containing protein             | 254                 | 44890..45651               | 96_GENE_12  |
| 10933     | 46   | CGL2_10933046       | Conserved protein of unknown function              | 335                 | 45707..46711               | 96_GENE_13  |
| 10933     | 47   | CGL2_10933047       | Protein of unknown function                        | 335                 | 46757..47761               | 96_GENE_14  |
| 10933tRNA |      | CGL2_10933R003      | TRNA Thr CGT                                       |                     | 47852..47926               |             |
| 10933     | 48   | CGL2_10933048       | Hypothetical protein                               | 412                 | complement(47999..49234)   | 96_GENE_15  |
|           |      | Strain variant path | Strain variant path                                | Strain variant path |                            |             |
| 11276     | 210  | CGL2_11276210       | Probable Holliday junction resolvase               | 450                 | complement(229981..231330) | 96_GENE_16  |
| 11276     | 210a | CGL2_11276210a      | Hypothetical protein                               | 115                 | complement(229625..229969) |             |
| 11276     | 209a | CGL2_11276209a      | Hypothetical protein                               | 126                 | complement(229169..229546) |             |
| 11276     | 209  | CGL2_11276209       | Hypothetical protein                               | 89                  | complement(228885..229151) |             |
| 11276     | 208  | CGL2_11276208       | Hypothetical protein                               | 242                 | complement(228142..228867) |             |
| 11276     | 207  | CGL2_11276207       | Hypothetical protein                               | 220                 | complement(227480..228139) |             |
|           |      | Strain variant path | Strain variant path                                | Strain variant path |                            |             |
| 11276     | 206  | CGL2_11276206       | Conjugal transfer protein, TraA                    | 976                 | complement(224503..227430) | 81_GENE_26  |
| 11276     | 205  | CGL2_11276205       | Hypothetical protein                               | 134                 | 223999..224400             | 81_GENE_25  |
| 11276     | 204  | CGL2_11276204       | Hypothetical protein                               | 129                 | 223451..223837             | 81_GENE_24  |
| 11276     | 203  | CGL2_11276203       | Hypothetical protein                               | 132                 | 222865..223260             | 81_GENE_22  |
| 11276     | 202  | CGL2_11276202       | Putative heavy metal efflux protein, CzcA          | 1060                | 219665..222844             | 81_GENE_21  |
| 11276     | 201  | CGL2_11276201       | Putative heavy metal efflux protein, CzcB          | 419                 | 218409..219665             | 81_GENE_20  |
| 11276     | 200  | CGL2_11276200       | Putative heavy metal efflux protein, CzcC          | 408                 | 217193..218416             | 81_GENE_19  |
| 11276     | 199  | CGL2_11276199       | Hypothetical protein                               | 67                  | 216013..216213             | 81_GENE_17  |
| 11276     | 198  | CGL2_11276198       | Hypothetical protein                               | 103                 | 215717..216025             | 81_GENE_16  |
| 11276     | 197  | CGL2_11276197       | Putative integrase                                 | 388                 | 214554..215717             |             |
|           |      |                     |                                                    |                     |                            |             |
| 10580     | 1    | CGL2_10580001       | Conserved protein of unknown function              | 106                 | 423..740                   | 527_GENE_7  |
| 10580     | 2    | CGL2_10580002       | Conserved protein of unknown function              | 129                 | complement(746..1132)      | 527_GENE_6  |
| 10580     | 3    | CGL2_10580003       | Hypothetical protein                               | 67                  | 1101..1301                 | 527_GENE_5a |
| 10580     | 4    | CGL2_10580004       | Hypothetical protein                               | 81                  | complement(1295..1537)     | 527_GENE_4a |
| 10580     | 5    | CGL2_10580005       | Putative phage integrase                           | 345                 | complement(1555..2589)     | 527_GENE_4  |
| 10580     | 6    | CGL2_10580006       | transposase                                        | 346                 | 3050..4087                 | 527_GENE_3  |
| 10580     | 7    | CGL2_10580007       | integrase fragment, INT 22C                        | 474                 | 4580..6001                 | 527_GENE_2  |
|           |      |                     |                                                    |                     |                            |             |
| 11276     | 196  | CGL2_11276196       | Conserved protein of unknown function              | 322                 | complement(213327..214292) | 6_GENE_66   |

|       |     |               |                                                     |     |                            |           |
|-------|-----|---------------|-----------------------------------------------------|-----|----------------------------|-----------|
| 11276 | 195 | CGL2_11276195 | Hypothetical protein                                | 49  | complement(213095..213241) | 6_GENE_65 |
| 11276 | 194 | CGL2_11276194 | Putative peptidase, M23B family                     | 332 | complement(211567..212562) | 6_GENE_64 |
| 11276 | 193 | CGL2_11276193 | Putative ATP-dependent Clp protease, ATPase subun   | 813 | complement(208771..211209) | 6_GENE_62 |
| 11276 | 192 | CGL2_11276192 | O-sialoglycoprotein endopeptidase (EC 3.4.24.57)    | 345 | complement(207711..208745) | 6_GENE_61 |
| 11276 | 191 | CGL2_11276191 | Arginyl-tRNA synthetase (EC 6.1.1.19)               | 595 | complement(205810..207594) | 6_GENE_60 |
| 11276 | 190 | CGL2_11276190 | Queuine tRNA-ribosyltransferase (EC 2.4.2.29)       | 378 | complement(204672..205805) | 6_GENE_59 |
| 11276 | 189 | CGL2_11276189 | Preprotein translocase, YajC subunit                | 96  | complement(204385..204672) | 6_GENE_58 |
| 11276 | 188 | CGL2_11276188 | SecD export membrane protein                        | 524 | complement(202762..204333) | 6_GENE_57 |
| 11276 | 187 | CGL2_11276187 | SecF export membrane protein                        | 321 | complement(201742..202704) | 6_GENE_56 |
| 11276 | 186 | CGL2_11276186 | Hypothetical protein                                | 37  | complement(201613..201723) | 6_GENE_55 |
| 11276 | 185 | CGL2_11276185 | Putative RecJ exonuclease                           | 549 | complement(199953..201599) | 6_GENE_54 |
| 11276 | 184 | CGL2_11276184 | GTP pyrophosphokinase (EC 2.7.6.5)                  | 762 | complement(197708..199993) | 6_GENE_53 |
| 11276 | 183 | CGL2_11276183 | Probable formate dehydrogenase accessory protein    | 302 | complement(196799..197704) | 6_GENE_52 |
| 11276 | 182 | CGL2_11276182 | Hypothetical protein                                | 83  | complement(196515..196763) | 6_GENE_51 |
| 11276 | 181 | CGL2_11276181 | Putative transcriptional regulator, TetR family     | 231 | complement(195720..196412) | 6_GENE_50 |
| 11276 | 180 | CGL2_11276180 | Probable cytochrome c-554                           | 200 | complement(195121..195720) | 6_GENE_49 |
| 11276 | 179 | CGL2_11276179 | Putative secretion protein HlyD                     | 317 | complement(194171..195121) | 6_GENE_48 |
| 11276 | 178 | CGL2_11276178 | Drug resistance transporter, EmrB/QacA family       | 527 | complement(192588..194168) | 6_GENE_47 |
| 11276 | 177 | CGL2_11276177 | Putative outer membrane efflux protein              | 464 | complement(191197..192588) | 6_GENE_46 |
| 11276 | 176 | CGL2_11276176 | Putative secretion protein HlyD                     | 330 | complement(190143..191132) | 6_GENE_45 |
| 11276 | 175 | CGL2_11276175 | Drug resistance transporter, EmrB/QacA family       | 540 | complement(188514..190133) | 6_GENE_44 |
| 11276 | 174 | CGL2_11276174 | Heat-inducible transcription repressor HrcA         | 352 | complement(187240..188295) | 6_GENE_43 |
| 11276 | 173 | CGL2_11276173 | Putative GrpE protein                               | 189 | complement(186661..187227) | 6_GENE_42 |
| 11276 | 172 | CGL2_11276172 | Chaperone DnaK                                      | 640 | complement(184649..186568) | 6_GENE_41 |
| 11276 | 171 | CGL2_11276171 | Chaperone DnaJ                                      | 372 | complement(183376..184491) | 6_GENE_40 |
| 11276 | 170 | CGL2_11276170 | Conserved protein of unknown function               | 287 | complement(182506..183366) | 6_GENE_39 |
| 11276 | 169 | CGL2_11276169 | Protein of unknown function                         | 148 | complement(182058..182501) | 6_GENE_38 |
| 11276 | 168 | CGL2_11276168 | Putative thiopurine S-methyltransferase             | 201 | complement(181422..182024) | 6_GENE_37 |
| 11276 | 167 | CGL2_11276167 | Putative cobalamin biosynthesis enzyme              | 179 | complement(180872..181408) | 6_GENE_36 |
| 11276 | 166 | CGL2_11276166 | Nicotinate-nucleotide--dimethylbenzimidazole phospl | 363 | complement(179724..180812) | 6_GENE_35 |
| 11276 | 165 | CGL2_11276165 | Putative cobalamin-5-phosphate synthase (CobS)      | 260 | complement(178945..179724) | 6_GENE_34 |
| 11276 | 164 | CGL2_11276164 | Conserved hypothetical protein                      | 136 | 178477..178884             | 6_GENE_33 |
| 11276 | 163 | CGL2_11276163 | Conserved hypothetical protein                      | 84  | 178226..178477             | 6_GENE_32 |
| 11276 | 162 | CGL2_11276162 | Protein of unknown function                         | 128 | 177856..178239             | 6_GENE_31 |
| 11276 | 161 | CGL2_11276161 | Hypothetical protein                                | 148 | 177351..177794             | 6_GENE_30 |
| 11276 | 160 | CGL2_11276160 | Hypothetical protein                                | 108 | 177008..177331             | 6_GENE_29 |
| 11276 | 159 | CGL2_11276159 | Aldo/keto reductase (EC 1.1.1.65)                   | 337 | 175692..176702             | 6_GENE_27 |
| 11276 | 158 | CGL2_11276158 | Putative phosphoglycerate mutase family protein     | 222 | complement(174799..175464) | 6_GENE_26 |
| 11276 | 157 | CGL2_11276157 | Cobyrinic acid a,c-diamide synthase (CbiA)          | 471 | complement(173391..174803) | 6_GENE_25 |
| 11276 | 156 | CGL2_11276156 | Putative precorrin-8X methylmutase (CbiC)           | 334 | complement(172337..173338) | 6_GENE_24 |
| 11276 | 155 | CGL2_11276155 | Isocitrate dehydrogenase (NAD+) (EC 1.1.1.41)       | 336 | complement(170991..171998) | 6_GENE_23 |

|           |     |                |                                                     |     |                            |            |
|-----------|-----|----------------|-----------------------------------------------------|-----|----------------------------|------------|
| 11276     | 154 | CGL2_11276154  | Probable isocitrate dehydrogenase (NADP)            | 116 | complement(170597..170944) | 6_GENE_22  |
| 11276tRNA |     | CGL2_11276R003 | TRNA Phe GAA                                        |     | 170086..170161             |            |
| 11276     | 153 | CGL2_11276153  | Putative bacterial surface antigen (D15)            | 781 | complement(167449..169791) | 6_GENE_20  |
| 11276     | 152 | CGL2_11276152  | Putative outer membrane protein (OmpH)              | 200 | complement(166771..167370) | 6_GENE_19  |
| 11276     | 151 | CGL2_11276151  | UDP-3-O-[3-hydroxymyristoyl] glucosamine N-acyltr   | 350 | complement(165722..166771) | 6_GENE_18  |
| 11276     | 150 | CGL2_11276150  | Beta-hydroxyacyl-(Acyl-carrier-protein) dehydratase | 173 | complement(165235..165753) | 6_GENE_17  |
| 11276     | 149 | CGL2_11276149  | UDP-N-acetylglucosamine acyltransferase (EC 2.3.1.  | 287 | complement(164375..165235) | 6_GENE_16  |
| 11276     | 148 | CGL2_11276148  | Conserved protein of unknown function               | 296 | complement(163495..164382) | 6_GENE_15  |
| 11276     | 147 | CGL2_11276147  | Putative oxidoreductase family protein              | 321 | complement(162539..163501) | 6_GENE_14  |
| 11276     | 146 | CGL2_11276146  | Lipid A disaccharide synthase (LpxB) (EC 2.4.1.182) | 405 | complement(161314..162528) | 6_GENE_13  |
| 11276     | 145 | CGL2_11276145  | glycosyltransferase                                 | 357 | complement(160204..161274) | 6_GENE_12  |
| 11276     | 144 | CGL2_11276144  | ABC transporter, ATP-binding protein, MsbA family   | 600 | complement(158351..160150) | 6_GENE_11  |
| 11276     | 143 | CGL2_11276143  | Putative 3-deoxy-D-manno-octulosonic-acid transfer. | 457 | complement(156981..158351) | 6_GENE_10  |
| 11276     | 142 | CGL2_11276142  | Tetraacyldisaccharide-1-P 4'-kinase (EC 2.7.1.130)  | 357 | complement(155911..156981) | 6_GENE_9   |
| 11276     | 141 | CGL2_11276141  | Putative lipid A biosynthesis acyltransferase       | 309 | complement(154985..155911) | 6_GENE_8   |
| 11276     | 140 | CGL2_11276140  | Hypothetical protein                                | 569 | complement(153271..154977) | 6_GENE_7   |
| 11276     | 139 | CGL2_11276139  | Putative heptosyltransferase family protein         | 402 | complement(152075..153280) | 6_GENE_6   |
| 11276     | 138 | CGL2_11276138  | Putative heptosyltransferase family protein         | 371 | complement(150967..152079) | 6_GENE_5   |
| 11276     | 137 | CGL2_11276137  | glycosyltransferase                                 | 250 | complement(150218..150967) | 6_GENE_4   |
| 11276     | 136 | CGL2_11276136  | Conserved protein of unknown function               | 283 | complement(149331..150179) | 6_GENE_3   |
| 11276     | 135 | CGL2_11276135  | transposase                                         | 330 | complement(148342..149331) | 68_GENE_28 |
| 11276     | 134 | CGL2_11276134  | Conserved hypothetical protein                      | 273 | complement(147388..148206) | 68_GENE_27 |
| 11276     | 133 | CGL2_11276133  | Putative glycosyl transferase, family 2             | 343 | complement(146173..147201) | 68_GENE_26 |
| 11276     | 132 | CGL2_11276132  | Lipopolysaccharide heptosyltransferase II           | 332 | complement(145060..146055) | 68_GENE_25 |
| 11276     | 131 | CGL2_11276131  | Histidinol-phosphate phosphatase                    | 199 | complement(144460..145056) | 68_GENE_24 |
| 11276     | 130 | CGL2_11276130  | Conserved protein of unknown function               | 61  | complement(144285..144467) | 68_GENE_23 |
| 11276     | 129 | CGL2_11276129  | Probable lipopolysaccharide heptosyltransferase II  | 344 | complement(143227..144258) | 68_GENE_22 |
| 11276     | 128 | CGL2_11276128  | Putative heptosyltransferase family protein         | 360 | complement(142145..143224) | 68_GENE_21 |
| 11276     | 127 | CGL2_11276127  | Putative polysaccharide deacetylase                 | 240 | complement(141426..142145) | 68_GENE_20 |
| 11276     | 126 | CGL2_11276126  | Putative glycosyl transferase, family 1             | 389 | complement(140238..141404) | 68_GENE_19 |
| 11276     | 125 | CGL2_11276125  | Protein of unknown function                         | 95  | complement(139954..140238) | 68_GENE_18 |
| 11276     | 124 | CGL2_11276124  | Probable diacylglycerol kinase                      | 255 | 139173..139937             | 68_GENE_17 |
| 11276     | 123 | CGL2_11276123  | Protein of unknown function                         | 289 | 138088..138954             | 68_GENE_16 |
| 11276     | 122 | CGL2_11276122  | Adenosylmethionine--8-amino-7-oxononanoate amin     | 444 | 136682..138013             | 68_GENE_15 |
| 11276     | 121 | CGL2_11276121  | Conserved protein of unknown function               | 295 | complement(135687..136571) | 68_GENE_14 |
| 11276     | 120 | CGL2_11276120  | Putative O-antigen polymerase                       | 453 | complement(134251..135609) | 68_GENE_12 |
| 11276     | 119 | CGL2_11276119  | Putative PilT protein-like                          | 351 | complement(133199..134251) | 68_GENE_11 |
| 11276     | 118 | CGL2_11276118  | 2-C-methyl-D-erythritol 4-phosphate cytidyltransfe  | 426 | complement(131922..133199) | 68_GENE_10 |
| 11276     | 117 | CGL2_11276117  | Serine O-acetyltransferase (EC 2.3.1.30)            | 234 | complement(131211..131912) | 68_GENE_9  |
| 11276     | 116 | CGL2_11276116  | Putative phosphoesterase, PA-phosphatase related    | 183 | complement(130645..131193) | 68_GENE_8  |
| 11276     | 115 | CGL2_11276115  | Conserved protein of unknown function               | 546 | complement(129008..130645) | 68_GENE_7  |

|           |     |                |                                                        |     |                            |           |
|-----------|-----|----------------|--------------------------------------------------------|-----|----------------------------|-----------|
| 11276     | 114 | CGL2_11276114  | Putative glycosyl transferase, family 9                | 403 | complement(127800..129008) | 68_GENE_6 |
| 11276     | 113 | CGL2_11276113  | Putative glycosyl transferase                          | 270 | complement(126978..127787) | 68_GENE_5 |
| 11276     | 112 | CGL2_11276112  | Probable glycosyl transferase, family 39               | 504 | complement(125467..126978) | 68_GENE_4 |
| 11276     | 111 | CGL2_11276111  | Phosphoribosylaminoimidazolecarboxamide formyltra      | 522 | complement(123827..125392) | 68_GENE_3 |
| 11276     | 110 | CGL2_11276110  | Phosphoribosylglycinamide synthetase (EC 6.3.4.13)     | 425 | complement(122527..123801) | 68_GENE_2 |
| 11276     | 108 | CGL2_11276108  | Putative translation factor (SUA5)                     | 204 | complement(121916..122527) | 68_GENE_1 |
| 11276     | 107 | CGL2_11276107  | Protein of unknown function                            | 117 | complement(121357..121707) | 8_GENE_1  |
| 11276     | 106 | CGL2_11276106  | Putative methyltransferase                             | 189 | complement(120732..121298) | 8_GENE_2  |
| 11276     | 105 | CGL2_11276105  | Phosphopantetheine adenylyltransferase (EC 2.7.7.3     | 166 | complement(120235..120732) | 8_GENE_3  |
| 11276     | 104 | CGL2_11276104  | Aspartate aminotransferase (EC 2.6.1.1)                | 403 | complement(119027..120235) | 8_GENE_4  |
| 11276     | 103 | CGL2_11276103  | Conserved protein of unknown function                  | 112 | complement(118581..118916) | 8_GENE_6  |
| 11276     | 102 | CGL2_11276102  | Putative ABC transporter, ATP-binding protein          | 247 | 117833..118573             | 8_GENE_7  |
| 11276     | 101 | CGL2_11276101  | Lipoprotein releasing system, transmembrane protei     | 412 | 116598..117833             | 8_GENE_8  |
| 11276     | 100 | CGL2_11276100  | Lysyl-tRNA synthetase (EC 6.1.1.6)                     | 507 | 115078..116598             | 8_GENE_9  |
| 11276     | 99  | CGL2_11276099  | Translation initiation factor, aIF-2BI/5-methylthiorib | 350 | 114012..115061             | 8_GENE_10 |
| 11276     | 98  | CGL2_11276098  | Putative glycogen debranching enzyme                   | 680 | 111910..113949             | 8_GENE_11 |
| 11276     | 97  | CGL2_11276097  | Ferrochelatase (EC 4.99.1.1)                           | 356 | 110825..111892             | 8_GENE_12 |
| 11276     | 96  | CGL2_11276096  | Putative permease, YjgP/YjgQ family                    | 362 | 109726..110811             | 8_GENE_13 |
| 11276     | 95  | CGL2_11276095  | Putative permease, YjgP/YjgQ family                    | 378 | 108593..109726             | 8_GENE_14 |
| 11276     | 94  | CGL2_11276094  | TRNA-i(6)A37 modification enzyme (MiaB)                | 468 | 107156..108559             | 8_GENE_15 |
| 11276     | 93  | CGL2_11276093  | Protein of unknown function                            | 134 | 106759..107160             | 8_GENE_16 |
| 11276     | 92  | CGL2_11276092  | Putative SAM-dependent methyltransferases              | 191 | 106214..106786             | 8_GENE_17 |
| 11276     | 91  | CGL2_11276091  | Protein of unknown function                            | 208 | 105494..106117             | 8_GENE_18 |
| 11276     | 90  | CGL2_11276090  | Putative cytochrome c, class I                         | 133 | complement(104820..105218) | 8_GENE_20 |
| 11276     | 89  | CGL2_11276089  | transposase                                            | 446 | complement(103323..104660) | 8_GENE_21 |
| 11276     | 88  | CGL2_11276088  | Aspartate aminotransferase (EC 2.6.1.17)               | 399 | complement(101673..102869) | 8_GENE_22 |
| 11276     | 87  | CGL2_11276087  | Protein of unknown function                            | 215 | complement(101029..101673) | 8_GENE_23 |
| 11276     | 86  | CGL2_11276086  | Homoserine dehydrogenase (EC 1.1.1.3)                  | 443 | complement(99579..100907)  | 8_GENE_24 |
| 11276     | 85  | CGL2_11276085  | Threonine synthase (EC 4.2.3.1)                        | 353 | complement(98521..99579)   | 8_GENE_25 |
| 11276     | 84  | CGL2_11276084  | Probable phosphoglycerate mutase                       | 400 | complement(97297..98496)   | 8_GENE_26 |
| 11276     | 83  | CGL2_11276083  | Aspartate kinase (EC 2.7.2.4)                          | 412 | complement(96068..97303)   | 8_GENE_27 |
| 11276     | 82  | CGL2_11276082  | 2-isopropylmalate synthase (EC 2.3.3.13)               | 544 | complement(94444..96075)   | 8_GENE_28 |
| 11276     | 81  | CGL2_11276081  | Acyl-(Acyl-carrier-protein)--UDP-N-acetylglucosamin    | 270 | complement(93639..94448)   | 8_GENE_29 |
| 11276     | 80  | CGL2_11276080  | Putative integration host factor, alpha subunit HimA   | 98  | complement(93318..93611)   | 8_GENE_30 |
| 11276     | 79  | CGL2_11276079  | Putative transcriptional regulator, MerR family        | 113 | complement(92878..93216)   | 8_GENE_31 |
| 11276tRNA |     | CGL2_11276R002 | TRNA Pro GGG                                           |     | complement(92808..92884)   |           |
| 11276     | 78  | CGL2_11276078  | Acid phosphatase (SurE) (EC 3.1.3.2)                   | 266 | complement(91906..92703)   | 8_GENE_32 |
| 11276     | 77  | CGL2_11276077  | Protein of unknown function                            | 189 | complement(91329..91895)   | 8_GENE_33 |
| 11276     | 76  | CGL2_11276076  | Cysteinyl-tRNA synthetase, class Ia (EC 6.1.1.16)      | 490 | complement(89870..91339)   | 8_GENE_34 |
| 11276     | 75  | CGL2_11276075  | Putative TRNA/rRNA methyltransferase (SpoU)            | 192 | complement(89139..89714)   | 8_GENE_35 |
| 11276     | 74  | CGL2_11276074  | Putative thioredoxin family protein                    | 214 | complement(88357..88998)   | 8_GENE_36 |

|       |    |               |                                                      |      |                          |             |
|-------|----|---------------|------------------------------------------------------|------|--------------------------|-------------|
| 11276 | 73 | CGL2_11276073 | NAD+ synthase (EC 6.3.5.1)                           | 592  | complement(86582..88357) | 8_GENE_37   |
| 11276 | 72 | CGL2_11276072 | 3,4-dihydroxy-2-butanone 4-phosphate synthase/GT     | 400  | complement(85328..86527) | 8_GENE_38   |
| 11276 | 71 | CGL2_11276071 | 6,7-dimethyl-8-ribityllumazine synthase (EC 2.5.1.9) | 161  | complement(84822..85304) | 8_GENE_39   |
| 11276 | 70 | CGL2_11276070 | Transcription antitermination factor (NusB)          | 168  | complement(84319..84822) | 8_GENE_40   |
| 11276 | 69 | CGL2_11276069 | Protein of unknown function                          | 166  | complement(83822..84319) | 8_GENE_41   |
| 11276 | 68 | CGL2_11276068 | Adenylosuccinate lyase (EC 4.3.2.2)                  | 437  | complement(82418..83728) | 8_GENE_42   |
| 11276 | 67 | CGL2_11276067 | Phosphoribosylaminoimidazole-succinocarboxamide s    | 239  | complement(81644..82360) | 8_GENE_43   |
| 11276 | 66 | CGL2_11276066 | Phosphoribosylformylglycinamidine synthetase (PurS   | 98   | complement(81364..81657) | 8_GENE_43a  |
| 11276 | 65 | CGL2_11276065 | Protein of unknown function                          | 446  | complement(80024..81361) | 8_GENE_45   |
| 11276 | 64 | CGL2_11276064 | Putative asparaginase                                | 308  | complement(79087..80010) | 8_GENE_46   |
| 11276 | 63 | CGL2_11276063 | Acetate kinase (EC 2.7.2.1)                          | 374  | 77809..78930             | 8_GENE_47   |
| 11276 | 62 | CGL2_11276062 | Putative methyltransferase                           | 224  | complement(77008..77679) | 8_GENE_48   |
| 11276 | 61 | CGL2_11276061 | Hypothetical protein                                 | 970  | 74052..76961             | 8_GENE_49   |
| 11276 | 60 | CGL2_11276060 | TonB protein                                         | 222  | 73316..73981             | 8_GENE_50   |
| 11276 | 59 | CGL2_11276059 | TonB system transport protein, ExbD                  | 137  | 72884..73294             | 8_GENE_51   |
| 11276 | 58 | CGL2_11276058 | biopolymer transport protein, ExbB                   | 230  | 72116..72805             | 8_GENE_52   |
| 11276 | 57 | CGL2_11276057 | Putative ABC transporter permease protein            | 372  | 70783..71898             | 8_GENE_53   |
| 11276 | 56 | CGL2_11276056 | Putative ABC transporter permease protein            | 378  | 69650..70783             | 8_GENE_54   |
| 11276 | 55 | CGL2_11276055 | BC transporter ATP-binding protein (EC 3.6.3.25)     | 592  | 67875..69650             | 8_GENE_55   |
| 11276 | 54 | CGL2_11276054 | Secretion protein (HlyD)                             | 301  | 66983..67885             | 8_GENE_56   |
| 11276 | 53 | CGL2_11276053 | Putative outer membrane efflux protein               | 483  | 65508..66956             | 8_GENE_57   |
| 11276 | 52 | CGL2_11276052 | Putative cytochrome c, class I                       | 110  | 65093..65422             | 8_GENE_58   |
| 11276 | 51 | CGL2_11276051 | Fructose-6-phosphate phosphoketolase (EC 4.1.2.22    | 788  | complement(62484..64847) | 8_GENE_59   |
| 11276 | 50 | CGL2_11276050 | Fructose-bisphosphate aldolase (EC 4.1.2.13)         | 305  | complement(61517..62431) | 8_GENE_60   |
| 11276 | 49 | CGL2_11276049 | Dihydrolipoyl dehydrogenase (EC 1.8.1.4)             | 461  | complement(60057..61439) | 8_GENE_61   |
| 11276 | 48 | CGL2_11276048 | Conserved protein of unknown function                | 304  | 59095..60006             | 8_GENE_62   |
| 11276 | 47 | CGL2_11276047 | Glycogen phosphorylase (EC 2.4.1.1)                  | 862  | 56395..58980             | 8_GENE_63   |
| 11276 | 46 | CGL2_11276046 | Phosphoglucomutase, alpha-D-glucose phosphate-sp     | 547  | 54729..56369             | 8_GENE_64   |
| 11276 | 45 | CGL2_11276045 | Putative transposase                                 | 362  | complement(53117..54202) | 8_GENE_65   |
| 11276 | 44 | CGL2_11276044 | Probable cytochrome c oxidase, subunit I (cbb-type)  | 460  | complement(51308..52687) | 8_GENE_66   |
| 11276 | 43 | CGL2_11276043 | Putative major facilitator superfamily protein       | 510  | complement(49355..50884) | 8_GENE_67   |
| 11276 | 42 | CGL2_11276042 | Hypothetical protein                                 | 110  | 48898..49227             | 8_GENE_68   |
| 11276 | 41 | CGL2_11276041 | ABC transporter, ATP-binding protein                 | 555  | 47215..48879             | 8_GENE_69   |
| 11276 | 40 | CGL2_11276040 | Conserved protein of unknown function                | 95   | complement(46239..46523) | 8_GENE_70   |
| 11276 | 39 | CGL2_11276039 | Conserved protein of unknown function                | 132  | complement(45752..46147) | 141_GENE_2  |
| 11276 | 38 | CGL2_11276038 | Putative OmpA family protein                         | 265  | complement(44871..45665) | 141_GENE_3  |
| 11276 | 37 | CGL2_11276037 | Conserved hypothetical protein                       | 227  | 43720..44400             | 141_GENE_5  |
| 11276 | 36 | CGL2_11276036 | Putative metallophosphoesterase                      | 251  | complement(42818..43570) | 141_GENE_6  |
| 11276 | 35 | CGL2_11276035 | Conserved hypothetical protein                       | 1175 | 39220..42744             | 141_GENE_7  |
| 11276 | 34 | CGL2_11276034 | DNA repair exonuclease                               | 410  | 37991..39220             | 141_GENE_8  |
| 11276 | 33 | CGL2_11276033 | Conserved hypothetical protein                       | 195  | 37000..37584             | 141_GENE_10 |

|           |     |                     |                                                    |                     |                          |             |
|-----------|-----|---------------------|----------------------------------------------------|---------------------|--------------------------|-------------|
| 11276     | 32  | CGL2_11276032       | Conserved hypothetical protein                     | 238                 | 36287..37000             | 141_GENE_11 |
| 11276     | 31  | CGL2_11276031       | Conserved hypothetical protein                     | 390                 | 35111..36280             | 141_GENE_12 |
| 11276     | 30  | CGL2_11276030       | Conserved hypothetical protein                     | 571                 | 33372..35084             | 141_GENE_13 |
| 11276     | 29  | CGL2_11276029       | serine protease                                    | 326                 | 32301..33278             | 141_GENE_14 |
| 11276     | 28  | CGL2_11276028       | Protein of unknown function                        | 195                 | 31682..32266             | 69_GENE_29  |
| 11276     | 27  | CGL2_11276027       | Hypothetical protein                               | 406                 | 30404..31621             | 69_GENE_28  |
| 11276     | 26  | CGL2_11276026       | Hypothetical protein                               | 217                 | 29711..30361             | 69_GENE_26  |
| 11276     | 25  | CGL2_11276025       | Protein of unknown function                        | 313                 | complement(28269..29207) | 69_GENE_25  |
| 11276     | 24  | CGL2_11276024       | Conserved hypothetical protein                     | 176                 | complement(27599..28126) | 69_GENE_24  |
| 11276     | 23  | CGL2_11276023       | Conserved hypothetical protein                     | 267                 | complement(26722..27522) | 69_GENE_21  |
| 11276     | 22  | CGL2_11276022       | transposase                                        | 316                 | complement(25796..26743) | 69_GENE_20  |
| 11276     | 21  | CGL2_11276021       | transposase                                        | 138                 | complement(25402..25815) | 69_GENE_19  |
| 11276     | 20  | CGL2_11276020       | Conserved hypothetical protein                     | 373                 | complement(24041..25159) | 69_GENE_18  |
| 11276     | 19  | CGL2_11276019       | Hypothetical protein                               | 120                 | complement(23424..23783) | 69_GENE_17  |
| 11276     | 18  | CGL2_11276018       | Conserved hypothetical protein                     | 59                  | complement(22360..22536) | 69_GENE_15  |
| 11276     | 17  | CGL2_11276017       | Conserved hypothetical protein                     | 103                 | 21919..22227             | 69_GENE_14  |
| 11276     | 16  | CGL2_11276016       | universal stress protein                           | 287                 | 21011..21871             | 69_GENE_13  |
| 11276     | 15  | CGL2_11276015       | sulfate permease                                   | 491                 | 19521..20993             | 69_GENE_12  |
| 11276     | 14  | CGL2_11276014       | Hypothetical protein                               | 217                 | complement(18013..18663) | 69_GENE_11  |
|           |     | Strain variant path | Strain variant path                                | Strain variant path |                          |             |
| 11276     | 13a | CGL2_11276013a      | Probable transposase                               | 130                 | complement(17227..17616) |             |
| 11276tRNA |     | CGL2_11276R001      | TRNA Arg CCT                                       |                     | 17023..17099             |             |
| 11276     | 13  | CGL2_11276013       | Hypothetical protein                               | 56                  | 16792..16959             | 167_GENE_11 |
| 11276     | 11  | CGL2_11276011       | N-acetylmuramoyl-L-alanine amidase (EC 3.5.1.28)   | 437                 | 15391..16701             | 167_GENE_10 |
| 11276     | 11  | CGL2_11276011       | N-acetylmuramoyl-L-alanine amidase (EC 3.5.1.28)   | 437                 | 15391..16701             | 167_GENE_10 |
| 11276     | 10  | CGL2_11276010       | Conserved protein of unknown function              | 132                 | complement(14672..15067) | 167_GENE_8  |
| 11276     | 9   | CGL2_11276009       | Protein of unknown function                        | 714                 | complement(12502..14643) | 167_GENE_7  |
| 11276     | 8   | CGL2_11276008       | Putative peptidase M50                             | 243                 | complement(11699..12427) | 167_GENE_6  |
| 11276     | 7   | CGL2_11276007       | Tryptophanyl-tRNA synthetase (EC 6.1.1.2)          | 355                 | complement(10577..11641) | 167_GENE_5  |
| 11276     | 6   | CGL2_11276006       | Acetyl-coenzyme A carboxylase carboxyl transferase | 296                 | complement(9579..10466)  | 167_GENE_4  |
| 11276     | 5   | CGL2_11276005       | DNA polymerase III, alpha subunit (EC 2.7.7.7)     | 1201                | 5955..9557               | 167_GENE_3  |
| 11276     | 4   | CGL2_11276004       | Putative UvrD/REP helicase                         | 649                 | 3953..5899               | 167_GENE_2  |
| 11276     | 3   | CGL2_11276003       | Conserved hypothetical protein                     | 288                 | complement(2946..3809)   | 824_GENE_4  |
| 11276     | 2   | CGL2_11276002       | Methyl accepting chemotaxis transducer             | 714                 | complement(547..2688)    | 824_GENE_2  |
| 11276     | 1   | CGL2_11276001       | probable transposase                               | 128                 | complement(40..422)      | 824_GENE_1  |

#### Strain variant contigs:

|      |   |               |                             |                                            |                        |            |
|------|---|---------------|-----------------------------|--------------------------------------------|------------------------|------------|
|      |   |               |                             | Strain variant linked to 11277 at ~142,000 |                        |            |
| 8975 | 2 | CGL2_08975002 | Protein of unknown function | 213                                        | complement(1682..2320) | 865_GENE_2 |

|                                                       |         |                |                                                        |      |                        |            |
|-------------------------------------------------------|---------|----------------|--------------------------------------------------------|------|------------------------|------------|
| 8975                                                  | 1 (=Var | CGL2_08975001  | Protein of unknown function (cyt 572, full on 7508)    | 409  | 46..1272               | 865_GENE_1 |
| cyt572                                                | A       | CGL2_11277153A | Cyt572 variant                                         |      |                        |            |
| cyt572                                                | B       | CGL2_11277153B | Cyt572 variant                                         |      |                        |            |
| cyt572                                                | C       | CGL2_11277153C | Cyt572 variant                                         |      |                        |            |
| cyt572                                                | D       | CGL2_11277153D | Cyt572 variant                                         |      |                        |            |
| cyt572                                                | E       | CGL2_11277153E | Cyt572 variant                                         |      |                        |            |
| Low depth, links via 7252 to 10391 = 11386 at ~16,000 |         |                |                                                        |      |                        |            |
| 7252                                                  | 1       | CGL2_07252001  | Hypothetical protein                                   | 126  | 434..811               |            |
| 7252                                                  | 2       | CGL2_07252002  | Hypothetical protein                                   | 110  | 811..1140              |            |
| 7252                                                  | 3       | CGL2_07252003  | Hypothetical protein                                   | 69   | 1140..1346             |            |
| 7252                                                  | 4       | CGL2_07252004  | Hypothetical protein                                   | 195  | 1524..2108             |            |
| 7252                                                  | 5       | CGL2_07252005  | Hypothetical protein                                   | 70   | 2068..2278             |            |
| 8492                                                  | 1       | CGL2_08492001  | Protein of unknown function                            | 366  | complement(403..1500)  | 402_GENE_5 |
| 9769                                                  | 3       | CGL2_09769003  | DNA primase                                            | 1133 | complement(1720..5118) | 402_GENE_4 |
| 9769                                                  | 2       | CGL2_09769002  | ATPase involved in ABC transporters                    | 221  | complement(585..1247)  | 402_GENE_2 |
| 9769                                                  | 1       | CGL2_09769001  | Hypothetical protein                                   | 165  | complement(58..552)    | 402_GENE_1 |
| Strain variant linked to 11386-11389                  |         |                |                                                        |      |                        |            |
| 11389                                                 | 59a     | CGL2_11389059a | Hypothetical protein                                   | 161  | 61743..62225           |            |
| 11389                                                 | 58a     | CGL2_11389058a | Hypothetical protein                                   | 239  | 61019..61735           |            |
| 11389                                                 | 57a     | CGL2_11389057a | putative type III restriction-modification system, Res | 939  | 58210..61026           |            |
| 11389                                                 | 56a     | CGL2_11389056a | putative type III restriction-modification system, me  | 856  | 55640..58207           |            |
| 11389                                                 | 55a     | CGL2_11389055a | Hypothetical protein                                   | 241  | 54708..55430           |            |
| 11389                                                 | 54a     | CGL2_11389054a | Hypothetical protein                                   | 128  | 54230..54613           |            |
| 11389                                                 | 53a     | CGL2_11389053a | Hypothetical protein                                   | 674  | 52196..54217           |            |
| 11389                                                 | 52a     | CGL2_11389052a | Hypothetical protein                                   | 301  | 51267..52169           |            |
| 11389                                                 | 51a     | CGL2_11389051a | Hypothetical protein                                   | 204  | 50342..50953           |            |
| 11389                                                 | 50a     | CGL2_11389050a | Putative integrase                                     | 404  | 49123..50334           |            |
| 11389                                                 | 49      | CGL2_11389049  | SsrA-binding protein                                   | 163  | 48031..48519           | 26_GENE_24 |
| 11389                                                 | 48      | CGL2_11389048  | Leucyl aminopeptidase (EC 3.4.11.1)                    | 533  | 46367..47965           | 26_GENE_25 |
| 11389                                                 | 47      | CGL2_11389047  | ExsB protein (succinoglycan synthase?)                 | 241  | 45526..46248           | 26_GENE_26 |
| 11389                                                 | 46      | CGL2_11389046  | Putative radical activating enzyme                     | 212  | 44885..45520           | 26_GENE_27 |
| 11389                                                 | 45      | CGL2_11389045  | Protein of unknown function                            | 231  | 44144..44836           | 26_GENE_28 |
| 11389                                                 | 44      | CGL2_11389044  | DNA gyrase, A subunit                                  | 816  | 41593..44040           | 26_GENE_29 |
| 11389                                                 | 43      | CGL2_11389043  | DNA gyrase, B subunit (EC 5.99.1.3)                    | 818  | 39081..41534           | 26_GENE_30 |
| 11389                                                 | 42      | CGL2_11389042  | DNA polymerase III, beta chain (EC 2.7.7.7)            | 387  | 37847..39007           | 26_GENE_31 |
| 11389                                                 | 41      | CGL2_11389041  | Chromosomal replication initiator protein (DnaA) ORI   | 465  | 36431..37825           | 26_GENE_32 |
| Strain variant linked to 10851 ~20 kb or 11346 ~21 kb |         |                |                                                        |      |                        |            |
| 11185                                                 | 1       | CGL2_11185001  | Probable Bacterial Conjugative Coupling Protein, Trw   | 128  | complement(311..694)   | 529_GENE_5 |
| 11185                                                 | 2       | CGL2_11185002  | Hypothetical protein                                   | 258  | complement(1186..1959) | 490_GENE_1 |
| 11185                                                 | 3       | CGL2_11185003  | Hypothetical protein                                   | 75   | complement(2248..2472) | 490_GENE_2 |
| 11185                                                 | 4       | CGL2_11185004  | Hypothetical protein                                   | 116  | complement(2610..2957) | 490_GENE_3 |

|                                                                          |    |               |                                                     |      |                          |             |
|--------------------------------------------------------------------------|----|---------------|-----------------------------------------------------|------|--------------------------|-------------|
| 11185                                                                    | 5  | CGL2_11185005 | Hypothetical protein                                | 112  | 3294..3629               | 490_GENE_5  |
| 11185                                                                    | 6  | CGL2_11185006 | Transposase                                         | 326  | complement(3801..4778)   | 490_GENE_6  |
| 11185                                                                    | 7  | CGL2_11185007 | Hypothetical protein                                | 46   | 4924..5061               | 490_GENE_7  |
| 11185                                                                    | 8  | CGL2_11185008 | Transposase                                         | 267  | complement(5328..6128)   |             |
| 11185                                                                    | 9  | CGL2_11185009 | Putative DNA helicase                               | 455  | complement(6166..7530)   |             |
| 11185                                                                    | 10 | CGL2_11185010 | Hypothetical protein                                | 107  | complement(7530..7850)   |             |
| Strain variant linked to 11068 at ~130,000                               |    |               |                                                     |      |                          |             |
| 9240                                                                     | 5  | CGL2_09240005 | Integrase                                           | 316  | complement(2150..3097)   | 435_GENE_1  |
| 9240                                                                     | 4  | CGL2_09240004 | <b>Hypothetical protein</b>                         | 69   | complement(1944..2150)   | 435_GENE_2  |
| 9240                                                                     | 3  | CGL2_09240003 | <b>Hypothetical protein</b>                         | 40   | complement(1841..1960)   | 435_GENE_3  |
| 9240                                                                     | 2  | CGL2_09240002 | <b>transcriptional activator</b>                    | 274  | complement(527..1348)    | 435_GENE_4  |
| 9240                                                                     | 1  | CGL2_09240001 | <b>transposase</b>                                  | 59   | 308..484                 | 435_GENE_5  |
| 11402                                                                    | 1  | CGL2_11402001 | transcriptional activator                           | 97   | 427..717                 | 435_GENE_6  |
| 6010                                                                     | 2  | CGL2_06010002 | autoinducer biosynthetic protein/LuxI-type quorum s | 234  | complement(403..1104)    | 435_GENE_7  |
| 9250                                                                     | 1  | CGL2_09250001 | Conserved hypothetical protein                      | 354  | 935..1996                | 435_GENE_8  |
| Strain variant linked to 9240                                            |    |               |                                                     |      |                          |             |
| 10101                                                                    | 1  | CGL2_10101001 | transposase                                         | 164  | complement(24..515)      | 234_GENE_9  |
| 10101                                                                    | 2  | CGL2_10101002 | pyoverdine chromophore precursor synthetase         | 1125 | 993..4367                | 234_GENE_8  |
| 10101                                                                    | 3  | CGL2_10101003 | transposase (single)                                | 248  | complement(4394..5137)   | 234_GENE_7  |
| 10065                                                                    | 6  | CGL2_10065006 | Hypothetical protein                                | 180  | complement(5248..5787)   | 234_GENE_6  |
| 10065                                                                    | 5  | CGL2_10065005 | acetolactate synthase, large subunit                | 587  | complement(3286..5046)   | 234_GENE_5  |
| 10065                                                                    | 4  | CGL2_10065004 | acetolactate synthase small subunit                 | 183  | complement(2738..3286)   | 234_GENE_4  |
| 10065                                                                    | 3  | CGL2_10065003 | Conserved hypothetical protein                      | 137  | complement(1862..2272)   | 234_GENE_3  |
| 10065                                                                    | 2  | CGL2_10065002 | biotin synthesis protein/methyltransferase          | 228  | complement(1179..1862)   | 234_GENE_2  |
| 10065                                                                    | 1  | CGL2_10065001 | DNA binding protein                                 | 165  | complement(602..1096)    | 234_GENE_1  |
| Strain variant linked to 10933 end (alternative to link to end of 11276) |    |               |                                                     |      |                          |             |
| 10608                                                                    | 11 | CGL2_10608011 | Hypothetical protein                                | 412  | 12940..14175             | 96_GENE_15  |
| 10608                                                                    | 10 | CGL2_10608010 | Probable Holliday junction resolvase                | 450  | complement(11153..12502) | 96_GENE_16  |
| 10608                                                                    | 9  | CGL2_10608009 | Hypothetical protein                                | 79   | complement(10900..11136) | 96_GENE_17  |
| 10608                                                                    | 8  | CGL2_10608008 | Protein of unknown function                         | 127  | complement(10524..10904) | 96_GENE_18  |
| 10608                                                                    | 7  | CGL2_10608007 | Probable mobilization protein, MobD                 | 242  | complement(9786..10511)  | 96_GENE_19  |
| 10608                                                                    | 6  | CGL2_10608006 | Hypothetical protein                                | 215  | complement(9138..9782)   | 637_GENE_2  |
| 10608                                                                    | 5  | CGL2_10608005 | Conjugal transfer protein, TraA                     | 976  | complement(6161..9088)   | 81_GENE_26  |
| 10608                                                                    | 4  | CGL2_10608004 | Hypothetical protein                                | 135  | 5654..6058               | 81_GENE_25  |
| 10608                                                                    | 3  | CGL2_10608003 | Hypothetical protein                                | 129  | 5106..5492               | 81_GENE_24  |
| 10608                                                                    | 2  | CGL2_10608002 | Hypothetical protein                                | 132  | 4520..4915               | 81_GENE_22  |
| 10608                                                                    | 1  | CGL2_10608001 | Putative heavy metal efflux protein, CzcA           | 1060 | 1320..4499               | 81_GENE_21  |
| Unclear how linked except for common (divergent) region to 11276/11608   |    |               |                                                     |      |                          |             |
| 11216                                                                    | 30 | CGL2_11216030 | ABC transporter, ATP-binding protein (EC 3.6.3.25)  | 138  | 31763..32176             | 115_GENE_22 |
| 11216                                                                    | 29 | CGL2_11216029 | Hypothetical protein                                | 98   | 31507..31800             | 115_GENE_21 |
| 11216                                                                    | 28 | CGL2_11216028 | Putative resolvase                                  | 198  | 30554..31147             | 115_GENE_20 |

|                                                                     |     |                |                                           |      |                          |             |
|---------------------------------------------------------------------|-----|----------------|-------------------------------------------|------|--------------------------|-------------|
| 11216                                                               | 27  | CGL2_11216027  | transposase                               | 451  | complement(29065..30417) | 115_GENE_19 |
| 11216                                                               | 26  | CGL2_11216026  | Hypothetical protein                      | 108  | 28621..28944             | 115_GENE_18 |
| 11216                                                               | 25  | CGL2_11216025  | Hypothetical protein                      | 104  | 28121..28432             | 115_GENE_17 |
| 11216                                                               | 24  | CGL2_11216024  | Hypothetical protein                      | 94   | 27844..28125             | 115_GENE_16 |
| 11216                                                               | 23  | CGL2_11216023  | Hypothetical protein                      | 57   | 27647..27817             | 115_GENE_15 |
| 11216                                                               | 22  | CGL2_11216022  | GGDEF/EAL domain-containing protein       | 404  | 26334..27545             | 115_GENE_13 |
| 11216                                                               | 21  | CGL2_11216021  | Hypothetical protein                      | 385  | 25087..26241             | 115_GENE_11 |
| 11216                                                               | 20  | CGL2_11216020  | Hypothetical protein                      | 104  | complement(24472..24783) | 115_GENE_10 |
| 11216                                                               | 19  | CGL2_11216019  | DNA primase                               | 1121 | complement(21107..24469) | 115_GENE_9  |
| 11216                                                               | 18  | CGL2_11216018  | Putative transcriptional regulator        | 102  | 20592..20897             | 115_GENE_8  |
| 11216                                                               | 17  | CGL2_11216017  | Hypothetical protein                      | 75   | 20378..20602             | 115_GENE_7  |
| 11216                                                               | 16  | CGL2_11216016  | Hypothetical protein                      | 135  | complement(19888..20292) | 115_GENE_6  |
| 11216                                                               | 15a | CGL2_11216015a | Hypothetical protein                      | 189  | complement(19280..19846) |             |
| 11216                                                               | 15  | CGL2_11216015  | mobilization protein, MobD                | 253  | complement(18550..19308) | 115_GENE_4  |
| 11216                                                               | 14  | CGL2_11216014  | Hypothetical protein                      | 237  | complement(17780..18490) | 115_GENE_3  |
| 11216                                                               | 13a | CGL2_11216013a | Hypothetical protein                      | 85   | complement(17202..17456) |             |
| 11216                                                               | 13  | CGL2_11216013  | Conjugal transfer protein, TraB           | 701  | complement(15097..17199) | 115_GENE_1  |
| 11216                                                               | 12  | CGL2_11216012  | Conjugal transfer protein, TraA           | 976  | complement(12167..15094) | 81_GENE_26  |
| 11216                                                               | 11  | CGL2_11216011  | Hypothetical protein                      | 135  | 11660..12064             | 81_GENE_25  |
| 11216                                                               | 10  | CGL2_11216010  | Hypothetical protein                      | 129  | 11112..11498             | 81_GENE_24  |
| 11216                                                               | 9   | CGL2_11216009  | Hypothetical protein                      | 132  | 10526..10921             | 81_GENE_22  |
| 11216                                                               | 8   | CGL2_11216008  | Putative heavy metal efflux protein, CzcA | 1060 | 7326..10505              | 81_GENE_21  |
| 11216                                                               | 7   | CGL2_11216007  | Putative heavy metal efflux protein, CzcB | 419  | 6070..7326               | 81_GENE_20  |
| 11216                                                               | 6   | CGL2_11216006  | Putative heavy metal efflux protein, CzcC | 408  | 4854..6077               | 81_GENE_19  |
| 11216                                                               | 5   | CGL2_11216005  | Hypothetical protein                      | 67   | 3674..3874               | 81_GENE_17  |
| 11216                                                               | 4   | CGL2_11216004  | Hypothetical protein                      | 103  | 3378..3686               | 81_GENE_16  |
| 11216                                                               | 3   | CGL2_11216003  | Recombinase                               | 373  | 2260..3378               | 81_GENE_15  |
| 11216                                                               | 2   | CGL2_11216002  | Putative integrase                        | 248  | complement(1269..2012)   |             |
| 11216                                                               | 1   | CGL2_11216001  | Hypothetical protein                      | 86   | complement(673..930)     |             |
| <b>Strain variant linked loosely internally to 11276 at ~18,000</b> |     |                |                                           |      |                          |             |
| 10638                                                               | 10  | CGL2_10638010  | Conserved hypothetical protein            | 168  | complement(19400..19903) | 69_GENE_10  |
| 10638                                                               | 9   | CGL2_10638009  | transposase                               | 242  | complement(18602..19327) | 69_GENE_9   |
| 10638                                                               | 8   | CGL2_10638008  | restriction endonuclease                  | 285  | complement(17519..18373) | 69_GENE_8   |
| 10638                                                               | 7   | CGL2_10638007  | RNA helicase                              | 1717 | complement(12316..17466) | 69_GENE_7   |
| 10638                                                               | 6   | CGL2_10638006  | Hypothetical protein                      | 59   | complement(11945..12121) | 69_GENE_5   |
| 10638                                                               | 5   | CGL2_10638005  | transposase                               | 254  | complement(10886..11647) | 69_GENE_4   |
| 10638                                                               | 4   | CGL2_10638004  | Hypothetical protein                      | 142  | complement(10461..10886) | 69_GENE_3   |
| 10638                                                               | 3   | CGL2_10638003  | Conserved hypothetical protein            | 67   | complement(9940..10140)  | 69_GENE_2   |
| 10638                                                               | 2   | CGL2_10638002  | Superfamily II DNA/RNA helicases          | 957  | complement(7079..9949)   | 69_GENE_1   |
| 10638                                                               | 1   | CGL2_10638001  | Superfamily II DNA/RNA helicases          | 1309 | complement(3153..7079)   |             |

Small, unplaced genome fragments, likely to be *Leptospirillum* group II:

|      |   |               |                                              |     |                        |            |
|------|---|---------------|----------------------------------------------|-----|------------------------|------------|
| 8298 | 6 | CGL3_08298006 | Hypothetical protein                         | 148 | complement(2927..3370) | 898_GENE_1 |
| 8298 | 5 | CGL3_08298005 | mobilization protein, MobC                   | 146 | complement(2155..2592) | 898_GENE_2 |
| 8298 | 4 | CGL3_08298004 | mobilization protein, MobD                   | 220 | complement(1468..2127) | 898_GENE_3 |
| 8298 | 3 | CGL3_08298003 | mobilization protein MobE                    | 207 | complement(848..1468)  | 898_GENE_5 |
| 8298 | 2 | CGL3_08298002 | Hypothetical protein                         | 110 | complement(516..845)   | 898_GENE_6 |
| 8298 | 1 | CGL3_08298001 | DNA helicase/TrwC                            | 179 | complement(29..565)    | 898_GENE_7 |
| 6909 | 5 | CGU_06909005  | Conserved hypothetical protein               | 106 | complement(1386..1703) | 888_GENE_5 |
| 6909 | 4 | CGU_06909004  | Hypothetical protein                         | 110 | complement(1057..1386) | 888_GENE_4 |
| 6909 | 3 | CGU_06909003  | Hypothetical protein                         | 157 | complement(549..1019)  | 888_GENE_3 |
| 6909 | 1 | CGU_06909001  | Hypothetical protein                         | 153 | complement(31..488)    |            |
| 9588 | 1 | CGLU_09588001 | helicase                                     | 844 | 25..2556               | 830_GENE_5 |
| 9588 | 2 | CGLU_09588002 | Protein of unknown function                  | 136 | 2691..3098             | 830_GENE_4 |
| 9588 | 3 | CGLU_09588003 | Hypothetical protein                         | 164 | complement(3290..3781) | 830_GENE_3 |
| 9588 | 4 | CGLU_09588004 | Conserved hypothetical protein               | 383 | complement(3808..4956) | 830_GENE_2 |
| 9588 | 5 | CGLU_09588005 | Hypothetical protein                         | 128 | complement(4972..5355) | 830_GENE_1 |
| 9588 | 6 | CGLU_09588006 | Hypothetical protein                         | 120 | complement(5349..5708) |            |
| 9588 | 7 | CGLU_09588007 | Hypothetical protein                         | 166 | complement(5736..6233) |            |
| 9144 | 1 | CGLU_09144001 | RNA helicase                                 | 294 | complement(78..959)    | 759_GENE_5 |
| 9144 | 2 | CGLU_09144002 | Hypothetical protein                         | 399 | complement(1003..2199) | 759_GENE_4 |
| 9144 | 3 | CGLU_09144003 | Hypothetical protein                         | 87  | complement(2306..2566) | 759_GENE_2 |
| 9144 | 4 | CGLU_09144004 | ATP-dependent protease La                    | 381 | complement(2566..3708) | 759_GENE_1 |
| 9074 | 7 | CGLU_09074007 | Hypothetical protein                         | 84  | 3258..3508             |            |
| 9074 | 6 | CGLU_09074006 | thiol-disulfide interchange protein, DsbG    | 328 | 1996..2979             | 728_GENE_6 |
| 9074 | 5 | CGLU_09074005 | Hypothetical protein                         | 89  | 1730..1996             | 728_GENE_5 |
| 9074 | 4 | CGLU_09074004 | Hypothetical protein                         | 99  | 1327..1623             | 728_GENE_4 |
| 9074 | 3 | CGLU_09074003 | Hypothetical protein                         | 67  | 1055..1255             | 728_GENE_3 |
| 9074 | 2 | CGLU_09074002 | Conserved hypothetical protein               | 209 | 396..1022              | 728_GENE_2 |
| 9074 | 1 | CGLU_09074001 | Conserved hypothetical protein               | 55  | 248..412               | 728_GENE_1 |
| 9375 | 1 | CGLU_09375001 | Putative phosphoribulokinase                 | 987 | 246..3206              | 745_GENE_2 |
| 9375 | 2 | CGLU_09375002 | Hypothetical protein                         | 87  | complement(3314..3574) | 745_GENE_3 |
| 9375 | 3 | CGLU_09375003 | Hypothetical protein                         | 477 | complement(3613..5043) | 745_GENE_4 |
| 8925 | 1 | CGL2_08925001 | Probable plasmid stabilization protein, StbA | 332 | complement(28..1023)   |            |

|      |   |               |                                             |     |                        |            |
|------|---|---------------|---------------------------------------------|-----|------------------------|------------|
| 8925 | 2 | CGL2_08925002 | DotB (type II secretion)                    | 367 | complement(1300..2400) | 569_GENE_5 |
| 8925 | 3 | CGL2_08925003 | Tral                                        | 275 | complement(2400..3224) | 569_GENE_4 |
| 8758 | 4 | CGL2_08758001 | sensory box/GGDEF domain/EAL domain protein | 346 | 558..1595              | 569_GENE_3 |
| 8758 | 5 | CGL2_08758002 | Protein of unknown function                 | 235 | 1901..2605             | 569_GENE_2 |
| 8758 | 6 | CGL2_08758003 | Putative chemotaxis protein MotB            | 244 | 2665..3396             | 569_GENE_1 |
| 9428 | 4 | CGLU_09428004 | Hypothetical protein                        | 300 | complement(3206..4105) |            |
| 9428 | 3 | CGLU_09428003 | Hypothetical protein                        | 126 | complement(2568..2945) |            |
| 9428 | 2 | CGLU_09428002 | Putative DNA primase                        | 511 | complement(1036..2568) | 673_GENE_1 |
| 9428 | 1 | CGLU_09428001 | Hypothetical protein                        | 231 | complement(1..693)     | 673_GENE_3 |
| 8706 | 4 | CGLU_08706004 | Hypothetical protein                        | 66  | complement(3127..3324) | 673_GENE_4 |
| 8706 | 3 | CGLU_08706003 | Hypothetical protein                        | 100 | complement(2377..2676) | 673_GENE_5 |
| 8706 | 3 | CGLU_08706002 | Putative mobilization relaxase, MobA        | 272 | complement(1562..2377) | 673_GENE_6 |
| 8706 | 1 | CGLU_08706001 | Putative type IV secretory pathway VirD4    | 449 | complement(161..1507)  |            |
| 9446 | 1 | CGLU_09446001 | Hypothetical protein                        | 151 | complement(70..522)    |            |
| 9446 | 2 | CGLU_09446002 | Conserved hypothetical protein              | 114 | complement(909..1250)  |            |
| 9446 | 3 | CGLU_09446003 | Putative hydrolase                          | 281 | complement(1373..2215) |            |
| 9446 | 4 | CGLU_09446004 | Putative SAM-dependent methyltransferase    | 227 | complement(2251..2931) |            |
| 9446 | 5 | CGLU_09446005 | Hypothetical protein                        | 111 | complement(2990..3322) |            |
| 9446 | 6 | CGLU_09446006 | Hypothetical protein                        | 103 | complement(3513..3821) | 592_GENE_1 |
| 9446 | 7 | CGLU_09446007 | Hypothetical protein                        | 110 | complement(4005..4334) | 592_GENE_2 |
| 9446 | 8 | CGLU_09446008 | Putative N-acetyl transferase               | 144 | complement(4429..4860) | 592_GENE_3 |
| 8858 | 4 | CGLU_08858004 | Hypothetical protein                        | 170 | 1298..1807             | 592_GENE_4 |
| 8858 | 3 | CGLU_08858003 | Putative hydrolase                          | 95  | 949..1233              | 592_GENE_5 |
| 8858 | 2 | CGLU_08858002 | Hypothetical protein                        | 54  | 677..838               | 592_GENE_6 |
| 8858 | 1 | CGLU_08858001 | Putative N-acetyl transferase               | 162 | 192..677               | 592_GENE_7 |
| 9713 | 5 | CGL3_09713005 | Conserved hypothetical protein              | 517 | complement(4991..6541) |            |
| 9713 | 4 | CGL3_09713004 | Probable DNA primase                        | 302 | complement(3611..4516) |            |
| 9713 | 3 | CGL3_09713003 | Hypothetical protein                        | 105 | complement(2736..3050) | 811_GENE_1 |
| 9713 | 2 | CGL3_09713002 | Putative mobilization relaxase, MobA        | 292 | complement(1861..2736) | 811_GENE_2 |
| 9713 | 1 | CGL3_09713001 | Putative Type IV secretion system, VirD4    | 599 | complement(69..1865)   | 811_GENE_3 |
| 9378 | 1 | CGL2_09378001 | Hypothetical protein                        | 398 | complement(502..1695)  | 684_GENE_1 |
| 9378 | 2 | CGL2_09378002 | Hypothetical protein                        | 425 | complement(1695..2969) | 684_GENE_2 |
| 9378 | 3 | CGL2_09378003 | Conserved protein of unknown function       | 238 | complement(2969..3682) | 684_GENE_3 |
| 9378 | 4 | CGL2_09378004 | Conserved protein of unknown function       | 161 | complement(3682..4164) | 684_GENE_4 |
| 9378 | 5 | CGL2_09378005 | Conserved protein of unknown function       | 136 | complement(4221..4628) | 684_GENE_5 |
| 9378 | 6 | CGL2_09378006 | Conserved protein of unknown function       | 195 | complement(4638..5222) | 684_GENE_6 |

|      |   |               |                                |      |                        |            |
|------|---|---------------|--------------------------------|------|------------------------|------------|
| 9792 | 8 | CGLU_09792008 | Conserved hypothetical protein | 71   | complement(6197..6409) | 478_GENE_8 |
| 9792 | 7 | CGLU_09792007 | Hypothetical protein           | 76   | complement(5983..6210) | 478_GENE_7 |
| 9792 | 6 | CGLU_09792006 | Protein of unknown function    | 97   | complement(5181..5471) | 478_GENE_6 |
| 9792 | 5 | CGLU_09792005 | Hypothetical protein           | 93   | 4893..5171             | 478_GENE_5 |
| 9792 | 4 | CGLU_09792004 | Putative plasmid helicase TrwC | 1153 | 1435..4893             | 478_GENE_4 |
| 9792 | 3 | CGLU_09792003 | Hypothetical protein           | 64   | 1239..1430             | 478_GENE_3 |
| 9792 | 2 | CGLU_09792002 | Hypothetical protein           | 58   | 1051..1224             | 478_GENE_2 |
| 9792 | 1 | CGLU_09792001 | Hypothetical protein           | 287  | 191..1051              | 478_GENE_1 |
