# Supplementary material
Source: PubMed Central journal article supplement (PMC2486301)
Supplement: pbio.0060177.st002.pdf [file pbio.0060177.st002.pdf]

|                                          | Phred quality score cutoff |         |         |         |         |
|------------------------------------------|----------------------------|---------|---------|---------|---------|
|                                          | 20                         | 25      | 30      | 40      | 50      |
| Total synonymous SNPs                    | 786                        | 734     | 707     | 640     | 547     |
| Total replacement SNPs                   | 701                        | 644     | 606     | 551     | 461     |
| Total intergenic SNPs (nt + indels)      | 534                        | 392     | 325     | 247     | 207     |
| Total indels in genes                    | 1058                       | 612     | 452     | 259     | 177     |
| Total indels in intergenic regions       | 304                        | 188     | 127     | 71      | 60      |
| Replicated synonymous SNPs               | 458                        | 440     | 427     | 387     | 333     |
| Replicated replacement SNPs              | 335                        | 325     | 313     | 282     | 228     |
| Replicated intergenic SNPs (nt + indels) | 119                        | 111     | 101     | 83      | 73      |
| Replicated indels in coding regions      | 65                         | 57      | 42      | 37      | 24      |
| Replicated indels in intergenic regions  | 22                         | 20      | 17      | 10      | 6       |
| Total SNPs                               | 3079                       | 2382    | 2090    | 1697    | 1392    |
| Total replicated SNPs                    | 977                        | 933     | 883     | 789     | 658     |
| Total sites in assembly                  | 2671936                    | 2669185 | 2665839 | 2422942 | 2402552 |
| Overall SNP density (%)                  | 0.12                       | 0.09    | 0.08    | 0.07    | 0.06    |
| Replicated SNP density (%)               | 0.04                       | 0.03    | 0.03    | 0.03    | 0.03    |
| % of all SNPs that are replicated        | 32                         | 39      | 42      | 46      | 47      |
| Ratio of replacement/synonymous SNPs     | 0.89                       | 0.88    | 0.86    | 0.86    | 0.84    |
| Density of synonymous SNPs (%)           | 0.029                      | 0.027   | 0.027   | 0.026   | 0.023   |
| Density of replacement SNPs (%)          | 0.026                      | 0.024   | 0.023   | 0.023   | 0.019   |
| Synonymous % of total                    | 25.5                       | 30.8    | 33.8    | 37.7    | 39.3    |
| Replacement % of total                   | 22.8                       | 27.0    | 29.0    | 32.5    | 33.1    |
| Intergenic % of total                    | 17.3                       | 16.5    | 15.6    | 14.6    | 14.9    |
| Indels in coding regions % of total      | 34.4                       | 25.7    | 21.6    | 15.3    | 12.7    |

Table S2: Classification of all SNPs observed in the 5-way CG *Leptospirillum* group II assembly. Increasing Phred quality score cutoffs were used to examine the effect of sequencing error on the distribution of SNPs between site classes.
