# Supplementary material
Source: PubMed Central journal article supplement (PMC2486301)
Supplement: pbio.0060177.st003.pdf [file pbio.0060177.st003.pdf]

Table S3

List of single nucleotide base pair positions on contigs that have been scaffolded into an ~700 Kb region that span the origin of replication. Yellow and pink highlights indicate SNPs that are linked on at least one read or by mate pair information. Blue highlights indicate the locations of significantly discrepant reads, most of which have ~100% sequence identity to reads of the UBA-type *Leptospirillum* group II ("L. rubarum"). Grey highlights indicate SNPs present in only a single read.

Jazz (2004) indicates positions on the scaffolds reported previously by Tyson et al. (2004).

Phrap (2006) indicates positions on the scaffolds reported here and shown in Fig. 2. Red bars separate contigs.

| Contig/Position     | Jazz (2004) | Phrap (2006)                        | Functional annotation                                 | Base 1 | Base 2 | Base 3 | #1 | #2 | #3 | Subst.      | Notes       | Strain     |
|---------------------|-------------|-------------------------------------|-------------------------------------------------------|--------|--------|--------|----|----|----|-------------|-------------|------------|
| <b>Contig 11277</b> |             |                                     |                                                       |        |        |        |    |    |    |             |             |            |
| 7167                | 42_11       | 5wayCG_Leptoll_Contig11277_GENE_11  | Chaperone protein HscA                                | G      | *      |        | 14 | 1  |    |             | shift       |            |
| 11012               | 42_17       | 5wayCG_Leptoll_Contig11277_GENE_16  | Protein of Unknown Function                           | G      | A      |        | 15 | 1  |    | T/A         |             |            |
| 11270               | 42_18       | 5wayCG_Leptoll_Contig11277_GENE_17  | Pseudouridylate synthase (4.2.1.70)                   | T      | *      |        | 13 | 1  |    |             | frameshift  |            |
| 12764               | 42_20       | 5wayCG_Leptoll_Contig11277_GENE_19  | Glycerol 3-phosphate dehydrogenase (NADP)             | G      | A      |        | 15 | 2  |    | Y/H         | split       |            |
| 13836               | 42_21       | 5wayCG_Leptoll_Contig11277_GENE_20  | Probable phosphoribosyltransferase                    | G      | *      |        | 10 | 1  |    |             | synonymous  |            |
| 13843               | 42_21       | 5wayCG_Leptoll_Contig11277_GENE_20  | Probable phosphoribosyltransferase                    | G      | *      |        | 10 | 1  |    |             | synonymous  |            |
| 14211               | 42_21       | 5wayCG_Leptoll_Contig11277_GENE_20  | Probable phosphoribosyltransferase                    | G      | *      |        | 12 | 1  |    |             | split       |            |
| 15250               | 42_22       | 5wayCG_Leptoll_Contig11277_GENE_21  | Protein of unknown function                           | C      | *      |        | 13 | 1  |    |             | shift       |            |
| 18675               | 42_24       | 5wayCG_Leptoll_Contig11277_GENE_23  | Putative phosphatidylethanolamine binding protein     | C      | *      |        | 14 | 1  |    |             | frameshift  |            |
| 18759               | 42_24       | 5wayCG_Leptoll_Contig11277_GENE_23  | Putative phosphatidylethanolamine binding protein     | G      | *      |        | 13 | 1  |    |             | split       |            |
| 20600               | 42_26       | 5wayCG_Leptoll_Contig11277_GENE_25  | Protein of unknown function                           | C      | A      |        | 10 | 2  |    | P/H         |             |            |
| 26922               | 42_33       | 5wayCG_Leptoll_Contig11277_GENE_32  | Putative peptidase M16                                | C      | *      |        | 6  | 1  |    |             | split/shift |            |
| 27338               | 42_34       | 5wayCG_Leptoll_Contig11277_GENE_33  | Putative peptidase M16                                | C      | *      |        | 10 | 1  |    |             | split       |            |
| 34153               |             |                                     | intergenic                                            | G      | A      |        | 2  | 1  |    |             | intergenic  |            |
| 35202               | 42_41       | 5wayCG_Leptoll_Contig11277_GENE_40  | Hypothetical protein                                  | C      | A      |        | 6  | 2  |    | A/S         |             |            |
| 40087_40090         | 21_5        | 5wayCG_Leptoll_Contig11277_GENE_46  | Hypothetical protein                                  | CGGG   | *GG*   |        | 10 | 1  |    |             | split       |            |
| 41999               |             |                                     | intergenic                                            | A      | C      |        | 21 | 1  |    |             | intergenic  |            |
| 42599               | 21_8        | 5wayCG_Leptoll_Contig11277_GENE_48  | Leucyl-tRNA synthetase (6.1.1.4)                      | C      | T      |        | 17 | 5  |    | P/L         |             |            |
| 50720               | pre 21_16   |                                     | intergenic                                            | T      | G      |        | 23 | 2  |    |             | intergenic  | strain 1   |
| 50737               | pre 21_16   |                                     | intergenic                                            | T      | C      |        | 22 | 2  |    |             | intergenic  | strain 1   |
| 51075               | 21_17       | 5wayCG_Leptoll_Contig11277_GENE_57  | Probable ATPase, PP-loop superfamily                  | C      | *      |        | 16 | 1  |    | L/S         | split       |            |
| 54816               |             |                                     | intergenic                                            | T      | *      |        | 7  | 1  |    |             | intergenic  |            |
| 55955-55958         | 21_21       | 5wayCG_Leptoll_Contig11277_GENE_62  | Anthranilate synthases component I (EC 4.1.3.27)      | ****   | AGTG   |        | 8  | 1  |    |             | split       |            |
| 57427               | 21_22       | 5wayCG_Leptoll_Contig11277_GENE_64  | Put. branched chain amino acid aminotransferase       | *      | C      |        | 10 | 1  |    |             | split       |            |
| 62690               | 21_25       | 5wayCG_Leptoll_Contig11277_GENE_67  | Protein of unknown function                           | A      | *      |        | 11 | 1  |    |             | shift/split |            |
| 63469-63471         | 21_26       | 5wayCG_Leptoll_Contig11277_GENE_68  | Protein of unknown function                           | TTC    | ***    |        | 12 | 1  |    |             | synonymous  |            |
| 67132               |             |                                     | intergenic                                            | G      | C      |        | 10 | 2  |    |             | intergenic  |            |
| 71020               | 21_34       | 5wayCG_Leptoll_Contig11277_GENE_73  | L-2,4-diaminobutyric acid acetyltransferase           | C      | T      |        | 12 | 1  |    |             | synonymous  |            |
| 72369               | 21_36       | 5wayCG_Leptoll_Contig11277_GENE_75  | Ectoine synthase                                      | T      | *      |        | 11 | 1  |    | L/M         | split       |            |
| 75164               | 21_41       | 5wayCG_Leptoll_Contig11277_GENE_80  | Prob. sodium/calcium exchanger membrane region        | C      | T      |        | 6  | 1  |    |             | synonymous  |            |
| 75976               | 21_42       | 5wayCG_Leptoll_Contig11277_GENE_81  | Probable transporter protein                          | C      | *      |        | 6  | 1  |    |             | shift/split |            |
| 78812               | 21_44       | 5wayCG_Leptoll_Contig11277_GENE_83  | Putative proteasome component                         | G      | A      |        | 5  | 1  |    |             | synonymous  |            |
| 79125               | 21_44       | 5wayCG_Leptoll_Contig11277_GENE_83  | Putative proteasome component                         | A      | *      |        | 7  | 1  |    |             | shift       |            |
| 81868               | 21_48       | 5wayCG_Leptoll_Contig11277_GENE_87  | Putative proteasome component                         | G      | A      |        | 2  | 4  |    |             | synonymous  | strain 2   |
| 81976               | 21_48       | 5wayCG_Leptoll_Contig11277_GENE_87  | Putative proteasome component                         | C      | A      |        | 3  | 2  |    |             | synonymous  | strain 2   |
| 85125               | 21_52       | 5wayCG_Leptoll_Contig11277_GENE_90  | Putative band 7 family protein                        | T      | C      |        | 11 | 1  |    |             | synonymous  |            |
| 85936               | 21_53       | 5wayCG_Leptoll_Contig11277_GENE_91  | Protein of unknown function                           | C      | T      |        | 7  | 3  |    |             | synonymous  | strain 3   |
| 86170               | 21_53       | 5wayCG_Leptoll_Contig11277_GENE_91  | Protein of unknown function                           | C      | A      |        | 9  | 2  |    |             | synonymous  | strain 3   |
| 86254               | 21_53       | 5wayCG_Leptoll_Contig11277_GENE_91  | Protein of unknown function                           | T      | C      |        | 10 | 2  |    |             | synonymous  | strain 3   |
| 87381               | 21_56       | 5wayCG_Leptoll_Contig11277_GENE_93  | Protein of unknown function                           | G      | A      |        | 14 | 1  |    | G/R         |             |            |
| 87757               | 21_57       | 5wayCG_Leptoll_Contig11277_GENE_94  | Alcohol dehydrogenase (EC 1.1.1.1)                    | C      | T      |        | 9  | 1  |    |             | synonymous  |            |
| 88418               | 21_57       | 5wayCG_Leptoll_Contig11277_GENE_94  | Alcohol dehydrogenase (EC 1.1.1.1)                    | G      | T      |        | 12 | 2  |    | T/N         |             | strain 4   |
| 88794               | (22_25)     |                                     | intergenic                                            | C      | A      |        | 13 | 5  |    |             | intergenic  | strain 4   |
| 91102               | 21_59       | 5wayCG_Leptoll_Contig11277_GENE_96  | Putative acriflavin resistance protein                | T      | C      |        | 9  | 1  |    |             | synonymous  | strain 4   |
| 91148               | 21_59       | 5wayCG_Leptoll_Contig11277_GENE_96  | Putative acriflavin resistance protein                | T      | C      |        | 12 | 1  |    | I/ V        |             | strain 4   |
| 111776              |             |                                     | Protein of unknown Function                           |        |        |        |    |    |    | XYG69022.b1 |             |            |
| 112111              | 32_36       | 5wayCG_Leptoll_Contig11277_GENE_114 | Protein of unknown function                           | C      | T      |        | 7  | 1  |    | R/G         |             |            |
| 113249              |             |                                     | intergenic                                            | A      | G      |        | 15 | 1  |    |             | intergenic  |            |
| 114540              |             |                                     | intergenic                                            | G      | C      |        | 10 | 1  |    |             | intergenic  |            |
| 116279              | 32_33       | 5wayCG_Leptoll_Contig11277_GENE_117 | Protein of unknown function                           | T      | G      |        | 13 | 1  |    |             | synonymous  |            |
| 116471              |             |                                     | intergenic                                            | G      | C      |        | 12 | 1  |    |             | intergenic  |            |
| 118656              | 32_28       | 5wayCG_Leptoll_Contig11277_GENE_121 | Protein of unknown function                           | A      | C      |        | 14 | 1  |    |             | synonymous  |            |
| 119686              | 32_26       | 5wayCG_Leptoll_Contig11277_GENE_123 | Protein of unknown function                           | G      | A      |        | 9  | 1  |    |             | synonymous  |            |
| 119692              | 32_26       | 5wayCG_Leptoll_Contig11277_GENE_123 | Protein of unknown function                           | G      | A      |        | 8  | 1  |    |             | synonymous  |            |
| 121277              | 32_7        | 5wayCG_Leptoll_Contig11277_GENE_144 | Probable thiamine biosynthesis protein                | A      | *      |        | 2  | 2  |    |             | split       |            |
| 125885              | 32_21       | 5wayCG_Leptoll_Contig11277_GENE_130 | Put. periplasmic signal transduction histidine kinase | C      | *      |        | 7  | 1  |    |             | frameshift  |            |
| 127655              | 32_20       | 5wayCG_Leptoll_Contig11277_GENE_131 | Putative response regulator receiver protein          | T      | *      |        | 8  | 1  |    |             | split       |            |
| 129887              | 32_18       | 5wayCG_Leptoll_Contig11277_GENE_133 | Prob. crossover junction endodeoxyribonuclease        | G      | T      |        | 11 | 1  |    | G/*         |             |            |
| 131217              | 32_16       | 5wayCG_Leptoll_Contig11277_GENE_135 | Holliday junction DNA helicase (RuvB)                 | G      | A      |        | 16 | 1  |    | G/E         |             |            |
| 132431              | 32_14       | 5wayCG_Leptoll_Contig11277_GENE_137 | Protein of unknown function                           | G      | A      |        | 7  | 1  |    |             |             |            |
| 135036              | 21_21       | 5wayCG_Leptoll_Contig11277_GENE_62  | intergenic                                            | C      | T      |        | 12 | 3  |    |             | intergenic  | strain 5   |
| 135155              | 32_9        | 5wayCG_Leptoll_Contig11277_GENE_142 | Protein of unknown function                           | A      | G      |        | 15 | 3  |    | T/A         |             | strain 5   |
| 135379              | 32_9        | 5wayCG_Leptoll_Contig11277_GENE_142 | Protein of unknown function                           | G      | A      |        | 13 | 1  |    | M/I         |             | strain 6   |
| 135973              |             |                                     | intergenic                                            | T      | C      |        | 12 | 1  |    |             | intergenic  | strain 6   |
| 136596              | 32_7        | 5wayCG_Leptoll_Contig11277_GENE_144 | Probable thiamine biosynthesis protein                | C      | T      |        | 21 | 1  |    |             | synonymous  | strain 5   |
| 136962              | 32_7        | 5wayCG_Leptoll_Contig11277_GENE_144 | Probable thiamine biosynthesis protein                | T      | A      |        | 14 | 5  |    |             | synonymous  | strain 5,7 |

|               |             |                                          |                                                                               |                               |                                        |    |    |         |                               |              |                               |
|---------------|-------------|------------------------------------------|-------------------------------------------------------------------------------|-------------------------------|----------------------------------------|----|----|---------|-------------------------------|--------------|-------------------------------|
| 136993        | 32_7        | 5wayCG_Leptoll_Contig11277_GENE_144      | Probable thiamine biosynthesis protein                                        | G                             | A                                      | 14 | 5  | N/D     |                               | strain 5,7   | strain 5,7                    |
| 137088        | 32_7        | 5wayCG_Leptoll_Contig11277_GENE_144      | Probable thiamine biosynthesis protein                                        | C                             | G                                      | 3  | 12 |         | synonymous                    | strain 5,7   | strain 5,7                    |
| 137136        | 32_7        | 5wayCG_Leptoll_Contig11277_GENE_144      | Probable thiamine biosynthesis protein                                        | C                             | T                                      | 2  | 13 |         | synonymous                    | strain 5,7   | strain 5,7                    |
| 137178        | 32_7        | 5wayCG_Leptoll_Contig11277_GENE_144      | Probable thiamine biosynthesis protein                                        | G                             | A                                      | 2  | 12 |         | synonymous                    | strain 5,7   | strain 5,7                    |
| 137233        | 32_7        | 5wayCG_Leptoll_Contig11277_GENE_144      | Probable thiamine biosynthesis protein                                        | T                             | C                                      | 3  | 11 | H/Y+    |                               | strain 5,7   | strain 5,7                    |
| 137484        | 32_6        | 5wayCG_Leptoll_Contig11277_GENE_145      | Probable radical SAM family protein                                           | C                             | T                                      | 13 | 1  | P/S     |                               | strain 5     | strain 5                      |
| 137633        | 32_6        | 5wayCG_Leptoll_Contig11277_GENE_145      | Probable radical SAM family protein                                           | T                             | C                                      | 6  | 4  |         | synonymous                    | strain 5     | strain 5                      |
| 137892        | 32_6        | 5wayCG_Leptoll_Contig11277_GENE_145      | Probable radical SAM family protein                                           | T                             | C                                      | 11 | 4  | W/R     |                               | strain 5,6   | strain 5,6                    |
| 138247        | 32_6        | 5wayCG_Leptoll_Contig11277_GENE_145      | Probable radical SAM family protein                                           | C                             | A                                      | 7  | 3  | T/N     |                               | strain 6     | strain 6                      |
| 138458        |             |                                          | intergenic                                                                    | T                             | C                                      | 9  | 4  |         | intergenic                    | strain 6,5   | strain 6,5                    |
| 138679        | 32_5        | 5wayCG_Leptoll_Contig11277_GENE_146      | Conserved protein of unknown function                                         | G                             | T                                      | 6  | 6  |         | synonymous                    | strain 6,5   | strain 6,5                    |
| 138738        | 32_5        | 5wayCG_Leptoll_Contig11277_GENE_146      | Conserved protein of unknown function                                         | A                             | G                                      | 5  | 6  | L/S     |                               | strain 6,5   | strain 6,5                    |
| 138860        | 32_5        | 5wayCG_Leptoll_Contig11277_GENE_146      | Conserved protein of unknown function                                         | T                             | C                                      | 7  | 7  |         | synonymous                    | strain 6,5   | strain 6,5                    |
| 138898        | 32_5        | 5wayCG_Leptoll_Contig11277_GENE_146      | Conserved protein of unknown function                                         | A                             | C                                      | 8  | 6  | A/S     |                               | strain 6,5   | strain 6,5                    |
| 138917        | 32_5        | 5wayCG_Leptoll_Contig11277_GENE_146      | Conserved protein of unknown function                                         | G                             | T                                      | 10 | 4  |         | synonymous                    | strain 6,5   | strain 6,5                    |
| 139022        | 32_5        | 5wayCG_Leptoll_Contig11277_GENE_146      | Conserved protein of unknown function                                         | G                             | A                                      | 11 | 8  |         | synonymous                    | strain 6,5   | strain 6,5                    |
| 139026        |             |                                          | intergenic                                                                    | A                             | T                                      | 9  | 7  |         | intergenic                    | strain 6,5   | strain 6,5                    |
| 139117-139789 | 32_4_32_3   | 5wayCG_Leptoll_Contig11277_GENES_147-149 | Probable oxidoreductase FAD/NAD(P)-binding protein and hetersulfide reductase |                               |                                        |    |    |         | Rec strain 6                  |              | Recombinant, but not UBA type |
| 139602        | 32_3        | 5wayCG_Leptoll_Contig11277_GENE_148      | heterodisulfide reductase                                                     | G                             | A                                      | 14 | 2  | C/R     |                               | strain 6     |                               |
| 142360        | 630_3       | 5wayCG_Leptoll_Contig11277_GENE_150      | Protein of unknown function                                                   | C                             | T                                      | 7  | 1  | H/Y     |                               |              |                               |
| 143212        |             |                                          | intergenic                                                                    | *                             | A                                      | 7  | 1  |         | synonymous                    |              |                               |
| 143228        | 630_4       | 5wayCG_Leptoll_Contig11277_GENE_151      | Transposase                                                                   | C                             | *                                      | 7  | 2  |         | synonymous                    | strain 8     | strain 8                      |
| 143663        | 630_4       | 5wayCG_Leptoll_Contig11277_GENE_151      | Transposase                                                                   | A                             | C                                      | 5  | 2  |         | synonymous                    | strain 8     | strain 8                      |
| 143697        | 630_4       | 5wayCG_Leptoll_Contig11277_GENE_151      | Transposase                                                                   | T                             | G                                      | 6  | 2  | S/A     |                               | strain 8     | strain 8                      |
| 143771        | 630_4       | 5wayCG_Leptoll_Contig11277_GENE_151      | Transposase                                                                   | C                             | T                                      | 4  | 2  |         | synonymous                    | strain 8     | strain 8                      |
| 143870        | 630_4       | 5wayCG_Leptoll_Contig11277_GENE_151      | Transposase                                                                   | C                             | G                                      | 3  | 4  |         | synonymous                    | strain 8     | strain 8                      |
| 144109        | 630_4       | 5wayCG_Leptoll_Contig11277_GENE_151      | Transposase                                                                   | G                             | A                                      | 4  | 2  | G/D     |                               | strain 8     | strain 8                      |
| 144648        | 630_5       | 5wayCG_Leptoll_Contig11277_GENE_152      | Protein of unknown function                                                   | C                             | A                                      | 7  | 1  | A/D     |                               | strain 9     | strain 9                      |
| 144738-144745 | 865_1/630_6 | 5wayCG_Leptoll_Contig11277_GENE_153      | Protein of unknown function                                                   | gttgtttgcctg<br>aataactacc    | *****g"tt"<br>***tt***                 | 1  | 8  |         | inserted block in single read |              |                               |
| 144962        | 630_6       | 5wayCG_Leptoll_Contig11277_GENE_153      | Newly described cytochrome                                                    | T                             | C                                      | 9  | 2  |         | synonymous                    | strain 9     | strain 9                      |
| 145398        | 630_6       | 5wayCG_Leptoll_Contig11277_GENE_153      | Newly described cytochrome                                                    | C                             | T                                      | 11 | 1  | G/E     |                               | strain 8     | strain 8                      |
| 145423        | 630_6       | 5wayCG_Leptoll_Contig11277_GENE_153      | Newly described cytochrome                                                    | C                             | G                                      | 8  | 2  | 1 G/R/R |                               | strain 9,8   | strain 9,8                    |
| 146000        | 630_6       | 5wayCG_Leptoll_Contig11277_GENE_153      | Newly described cytochrome                                                    | G                             | T                                      | 2  | 1  |         | synonymous                    | strain 9     | strain 9                      |
| 146005-146006 | 630_6       | 5wayCG_Leptoll_Contig11277_GENE_153      | Newly described cytochrome                                                    | GT                            | TA                                     | 2  | 1  | NKK/KQN |                               | strain 9     | strain 9                      |
| 153030        | 600_1       | 5wayCG_Leptoll_Contig11277_GENE_158      | DNA helicase                                                                  | T                             | G                                      | 2  | 1  | T/P     |                               |              |                               |
| 158619        |             |                                          | intergenic                                                                    | T                             | C                                      | 3  | 1  |         | intergenic                    |              |                               |
| 158808-158809 | 185_4       | 5wayCG_Leptoll_Contig11277_GENE_166      | hypothetical protein                                                          | GA                            | CC                                     | 3  | 3  | G/S     |                               | strain 10    | strain 10                     |
| 159439        | 185_6       | 5wayCG_Leptoll_Contig11277_GENE_168      | hypothetical protein                                                          | C                             | A                                      | 9  | 1  | G/V     |                               | strain 10    | strain 10                     |
| 161133-161157 |             |                                          | intergenic                                                                    | agccittctagg<br>cggttttgatggg | *g*****a**<br>****g**gg*               | 2  | 2  |         | intergenic                    |              | strain 10                     |
| 166469        | 185_19      | 5wayCG_Leptoll_Contig11277_GENE_180      | hypothetical protein                                                          | A                             | G                                      | 4  | 1  | F/S     |                               |              |                               |
| 166529        | 185_19      | 5wayCG_Leptoll_Contig11277_GENE_180      | hypothetical protein                                                          | A                             | C                                      | 5  | 1  | G/V     |                               |              |                               |
| 167006        | 185_19      | 5wayCG_Leptoll_Contig11277_GENE_180      | hypothetical protein                                                          | A                             | T                                      | 6  | 2  | F/Y     |                               |              |                               |
| 168152        | 185_21      | 5wayCG_Leptoll_Contig11277_GENE_181      | hypothetical protein                                                          | G                             | A                                      | 8  | 1  | S/L     |                               |              |                               |
| 168698        |             |                                          | intergenic                                                                    | A                             | G                                      | 2  | 2  |         | intergenic                    |              |                               |
| 168767        |             |                                          | intergenic                                                                    | A                             | G                                      | 2  | 1  |         | intergenic                    |              |                               |
| 168959        |             |                                          | intergenic                                                                    | A                             | G                                      | 1  | 1  |         | intergenic                    |              |                               |
| 169007        |             |                                          | intergenic                                                                    | A                             | G                                      | 1  | 1  |         | intergenic                    |              |                               |
| 169510        | 265_1       | ??                                       | Protein of Unknown Function                                                   | C                             | T                                      | 3  | 1  | E/K     |                               |              |                               |
| 172327-172334 |             |                                          | transposase                                                                   | ttaatgat<br>aaaa              | w/ *****<br>*aaa      w/ *****<br>*aa* | 2  | 2  | 5       | synonymous                    |              |                               |
| 178581        | 173_9       | 5wayCG_Leptoll_Contig11277_GENE_190      | Conserved protein of unknown function                                         | T                             | A                                      | 11 | 1  | K/N     |                               |              |                               |
| 179187        | 173_7       | 5wayCG_Leptoll_Contig11277_GENE_191      | hypothetical protein                                                          | ***                           | CCC                                    | 7  | 1  |         | synonymous                    |              |                               |
| 188278        | 374_7       | 5wayCG_Leptoll_Contig11277_GENE_203      | Protein of unknown function                                                   | T                             | C                                      | 13 | 1  |         | synonymous                    |              |                               |
| 189975        | 374_9       | 5wayCG_Leptoll_Contig11277_GENE_205      | Conserved hypothetical protein                                                | G                             | T                                      | 6  | 1  | P/Q     |                               |              |                               |
| 197543        | 4_93        | 5wayCG_Leptoll_Contig11277_GENE_214      | Heat shock protein HslU                                                       | C                             | T                                      | 16 | 1  | G/D     |                               | strain 11    | strain 11                     |
| 199000        | 4_91        | 5wayCG_Leptoll_Contig11277_GENE_216      | Putative phage integrase family protein                                       | *                             | G                                      | 7  | 1  |         | split                         |              |                               |
| 200273        | 4_90        | 5wayCG_Leptoll_Contig11277_GENE_218      | Putative glucose-inhibited division protein A                                 | C                             | T                                      | 7  | 2  | V/M     |                               | strain 12    | strain 12                     |
| 200696        | 4_90        | 5wayCG_Leptoll_Contig11277_GENE_218      | Putative glucose-inhibited division protein A                                 | A                             | G                                      | 4  | 4  | S/R     |                               | strain 12    | strain 12                     |
| 201058        | 4_90        | 5wayCG_Leptoll_Contig11277_GENE_218      | Putative glucose-inhibited division protein A                                 | C                             | T                                      | 6  | 4  |         | synonymous                    | strain 12    | strain 12                     |
| 201075        | 4_89        | 5wayCG_Leptoll_Contig11277_GENE_219      | DNA topoisomerase (EC 5.99.1.2)                                               | T                             | C                                      | 6  | 5  | I/V     |                               | strain 12    | strain 12                     |
| 201260        | 4_89        | 5wayCG_Leptoll_Contig11277_GENE_219      | DNA topoisomerase (EC 5.99.1.2)                                               | A                             | T                                      | 6  | 3  | H/L     |                               | strain 12    | strain 12                     |
| 201523        | 4_89        | 5wayCG_Leptoll_Contig11277_GENE_219      | DNA topoisomerase (EC 5.99.1.2)                                               | A                             | G                                      | 8  | 4  |         | synonymous                    | strain 12    | strain 12                     |
| 201526        | 4_89        | 5wayCG_Leptoll_Contig11277_GENE_219      | DNA topoisomerase (EC 5.99.1.2)                                               | T                             | C                                      | 7  | 4  |         | synonymous                    | strain 12    | strain 12                     |
| 202370        | 4_89        | 5wayCG_Leptoll_Contig11277_GENE_219      | DNA topoisomerase (EC 5.99.1.2)                                               | G                             | C                                      | 7  | 1  | R/T     |                               | strain 12    | strain 12                     |
| 202775        | 4_89        | 5wayCG_Leptoll_Contig11277_GENE_219      | DNA topoisomerase (EC 5.99.1.2)                                               | G                             | A                                      | 6  | 6  | L/P     |                               | strain 12    | strain 12                     |
| 203485        | 4_89        | 5wayCG_Leptoll_Contig11277_GENE_219      | DNA topoisomerase (EC 5.99.1.2)                                               | G                             | C                                      | 8  | 3  |         | synonymous                    | strain 12    | strain 12                     |
| 203491        | 4_89        | 5wayCG_Leptoll_Contig11277_GENE_219      | DNA topoisomerase (EC 5.99.1.2)                                               | A                             | G                                      | 5  | 3  |         | synonymous                    | strain 12    | strain 12                     |
| 203774        | 4_88        | 5wayCG_Leptoll_Contig11277_GENE_220      | DNA processing protein DprA                                                   | G                             | A                                      | 5  | 9  |         | synonymous                    | strain 12    | strain 12                     |
| 204475        | 4_88        | 5wayCG_Leptoll_Contig11277_GENE_220      | DNA processing protein DprA                                                   | G                             | A                                      | 8  | 6  | Y/H     |                               | strain 12    | strain 12                     |
| 204634        | 4_87        | 5wayCG_Leptoll_Contig11277_GENE_221      | Protein of unknown function                                                   | C                             | T                                      | 8  | 6  |         | synonymous                    | strain 12    | strain 12                     |
| 205018        | 4_86        | 5wayCG_Leptoll_Contig11277_GENE_222      | Putative ABC transporter ATP-binding protein                                  | A                             | C                                      | 7  | 4  |         | synonymous                    | strain 12    | strain 12                     |
| 205158        | 4_86        | 5wayCG_Leptoll_Contig11277_GENE_222      | Putative ABC transporter ATP-binding protein                                  | A                             | G                                      | 9  | 5  |         | synonymous                    | strain 12    | strain 12                     |
| 205246-205247 | 4_86        | 5wayCG_Leptoll_Contig11277_GENE_222      | Putative ABC transporter ATP-binding protein                                  | GG                            | **                                     | 13 | 1  |         | synonymous                    | strain 12    | strain 12                     |
| 205365        |             |                                          | intergenic                                                                    | C                             | A                                      | 7  | 6  |         | intergenic                    | strain 12    | strain 12                     |
| 205411        | 4_85        | 5wayCG_Leptoll_Contig11277_GENE_223      | Sulfate-transporting ATPase (EC 3.6.3.25)                                     | T                             | A                                      | 12 | 3  | T/S     |                               | strain 12,13 | strain 12,13                  |
| 205838        | 4_85        | 5wayCG_Leptoll_Contig11277_GENE_223      | Sulfate-transporting ATPase (EC 3.6.3.25)                                     | C                             | A                                      | 3  | 14 |         | synonymous                    | strain 12    | strain 12                     |

|               |       |                                     |                                                          |      |        |    |    |      |              |                                    |           |
|---------------|-------|-------------------------------------|----------------------------------------------------------|------|--------|----|----|------|--------------|------------------------------------|-----------|
| 205877        | 4_85  | 5wayCG_Leptoll_Contig11277_GENE_223 | Sulfate-transporting ATPase (EC 3.6.3.25)                | G    | A      | 3  | 14 |      | synonymous   | strain 12                          | strain 12 |
| 206084        | 4_85  | 5wayCG_Leptoll_Contig11277_GENE_223 | Sulfate-transporting ATPase (EC 3.6.3.25)                | T    | C      | 11 | 1  |      | synonymous   | strain 12                          | strain 12 |
| 206355        | 4_84  | 5wayCG_Leptoll_Contig11277_GENE_224 | Putative transmembrane transporter                       | G    | T      | 3  | 10 |      | synonymous   | strain 12                          | strain 12 |
| 206385        | 4_84  | 5wayCG_Leptoll_Contig11277_GENE_224 | Putative transmembrane transporter                       | T    | C      | 4  | 10 |      | synonymous   | strain 12                          | strain 12 |
| 206839        | 4_84  | 5wayCG_Leptoll_Contig11277_GENE_224 | Putative transmembrane transporter                       | G    | C      | 7  | 8  |      | synonymous   | strain 12                          | strain 12 |
| 206848        | 4_84  | 5wayCG_Leptoll_Contig11277_GENE_224 | Putative transmembrane transporter                       | C    | G      | 7  | 8  |      | synonymous   | strain 12                          | strain 12 |
| 207009-207011 | 4_84  | 5wayCG_Leptoll_Contig11277_GENE_224 | Putative transmembrane transporter                       | GCT  | CGG    | 6  | 5  |      | synonymous   | strain 12                          | strain 12 |
| 207015        | 4_84  | 5wayCG_Leptoll_Contig11277_GENE_224 | Putative transmembrane transporter                       | C    | G      | 6  | 5  |      | synonymous   | strain 12                          | strain 12 |
| 207026        | 4_84  | 5wayCG_Leptoll_Contig11277_GENE_224 | Putative transmembrane transporter                       | T    | C      | 6  | 7  | N/D  |              | strain 12                          | strain 12 |
| 207244        | 4_84  | 5wayCG_Leptoll_Contig11277_GENE_224 | Putative transmembrane transporter                       | T    | C      | 3  | 4  | O/R  |              |                                    |           |
| 210026        | 4_80  | 5wayCG_Leptoll_Contig11277_GENE_228 | Hypothetical                                             | C    | T      | 8  | 1  | V/M  |              |                                    |           |
| 210609        | 4_79  | 5wayCG_Leptoll_Contig11277_GENE_229 | Putative A/G-specific DNA glycosylase                    | G    | A      | 8  | 5  | A/V  |              | strain 13                          | strain 13 |
| 210767        | 4_79  | 5wayCG_Leptoll_Contig11277_GENE_229 | Putative A/G-specific DNA glycosylase                    | G    | A      | 8  | 5  |      | synonymous   | strain 13                          | strain 13 |
| 211010        | 4_79  | 5wayCG_Leptoll_Contig11277_GENE_229 | Putative A/G-specific DNA glycosylase                    | C    | T      | 8  | 5  |      | synonymous   | strain 13                          | strain 13 |
| 211052        | 4_79  | 5wayCG_Leptoll_Contig11277_GENE_229 | Putative A/G-specific DNA glycosylase                    | T    | C      | 7  | 5  |      | synonymous   | strain 13                          | strain 13 |
| 211587        | 4_79  | 5wayCG_Leptoll_Contig11277_GENE_229 | Putative A/G-specific DNA glycosylase                    | T    | C      | 9  | 14 | G/D  |              | strain 13                          | strain 13 |
| 211796        | 4_78  | 5wayCG_Leptoll_Contig11277_GENE_230 | Hypothetical                                             | A    | G      | 9  | 16 |      | synonymous   | strain 13                          | strain 13 |
| 212007        | 4_78  | 5wayCG_Leptoll_Contig11277_GENE_230 | Hypothetical                                             | A    | G      | 12 | 7  |      | synonymous   | strain 13                          | strain 13 |
| 212022        | 4_78  | 5wayCG_Leptoll_Contig11277_GENE_230 | Hypothetical                                             | G    | C      | 13 | 6  |      | synonymous   | strain 13                          | strain 13 |
| 212403        | 4_77  | 5wayCG_Leptoll_Contig11277_GENE_231 | Put. 2-amino-4-hydroxy-6-hydroxymethyl-                  | A    | C      | 8  | 4  | M/R  |              | strain 13                          | strain 13 |
| 212624        | 4_77  | 5wayCG_Leptoll_Contig11277_GENE_231 | dihydropteridine diphosphokinase                         | C    | A      | 9  | 6  |      | synonymous   | strain 13                          | strain 13 |
| 212786        | 4_77  | 5wayCG_Leptoll_Contig11277_GENE_231 | Putative 2-amino-4-hydroxy-6-hydroxymethyl-dihydrog      | A    | A      | 10 | 6  |      | synonymous   | strain 13                          | strain 13 |
| 213271        | 4_76  | 5wayCG_Leptoll_Contig11277_GENE_232 | Aspartate aminotransferase (EC 2.6.1.1)                  | G    | A      | 12 | 7  |      | synonymous   | strain 13                          | strain 13 |
| 213349        | 4_76  | 5wayCG_Leptoll_Contig11277_GENE_232 | Aspartate aminotransferase (EC 2.6.1.1)                  | A    | C      | 12 | 7  |      | synonymous   | strain 13                          | strain 13 |
| 213382        | 4_76  | 5wayCG_Leptoll_Contig11277_GENE_232 | Aspartate aminotransferase (EC 2.6.1.1)                  | A    | G      | 13 | 8  |      | synonymous   | strain 13                          | strain 13 |
| 213534        | 4_76  | 5wayCG_Leptoll_Contig11277_GENE_232 | Aspartate aminotransferase (EC 2.6.1.1)                  | C    | T      | 6  | 10 | N/D  |              | strain 13                          | strain 13 |
| 214730        | 4_75  | 5wayCG_Leptoll_Contig11277_GENE_233 | Hypothetical                                             | A    | G      | 13 | 5  |      | synonymous   | strain 13                          | strain 13 |
| 214829        | 4_75  | 5wayCG_Leptoll_Contig11277_GENE_233 | Hypothetical                                             | G    | T      | 14 | 5  | P/Q  |              | strain 13                          | strain 13 |
| 214902        | 4_75  | 5wayCG_Leptoll_Contig11277_GENE_233 | Hypothetical                                             | G    | A      | 15 | 4  | L/F  |              | strain 13                          | strain 13 |
| 215143        | 4_74  | 5wayCG_Leptoll_Contig11277_GENE_234 | Hypothetical                                             | T    | C      | 10 | 5  |      | synonymous   | strain 13                          | strain 13 |
| 215389        | 4_74  | 5wayCG_Leptoll_Contig11277_GENE_234 | Hypothetical                                             | T    | C      | 8  | 6  |      | synonymous   | strain 13                          | strain 13 |
| 215596        | 4_74  | 5wayCG_Leptoll_Contig11277_GENE_234 | Hypothetical                                             | A    | G      | 5  | 8  |      | synonymous   | strain 13                          | strain 13 |
| 216315        | 4_73  | 5wayCG_Leptoll_Contig11277_GENE_235 | Hypothetical                                             | A    | G      | 14 | 1  |      | synonymous   | strain 13                          | strain 13 |
| 217811        |       |                                     | Intergenic                                               | C    | A      | 9  | 5  |      | Intergenic   | strain14                           | strain14  |
| 217999        | 4_70  | 5wayCG_Leptoll_Contig11277_GENE_238 | 3-oxoacyl-[acyl-carrier-protein] reductase (1.1.1.100)   | A    | G      | 10 | 5  | I/V  |              | strain14                           | strain14  |
| 218010        | 4_70  | 5wayCG_Leptoll_Contig11277_GENE_238 | 3-oxoacyl-[acyl-carrier-protein] reductase (1.1.1.100)   | A    | T      | 9  | 6  |      | synonymous   | strain14                           | strain14  |
| 219619        | 4_68  | 5wayCG_Leptoll_Contig11277_GENE_240 | Hypothetical                                             | A    | G      | 6  | 2  |      | synonymous   |                                    |           |
| 220454        | 4_66  | 5wayCG_Leptoll_Contig11277_GENE_242 | Hypothetical                                             | G    | T      | 6  | 1  |      | synonymous   |                                    |           |
| 220651        |       | #N/A                                | Intergenic                                               | T    | G      | 8  | 1  |      | Intergenic   |                                    |           |
| 223689        | 4_62  | 5wayCG_Leptoll_Contig11277_GENE_246 | Put. methyl-accepting chemotaxis sensory transducer A    | A    | G      | 10 | 1  |      | synonymous   |                                    |           |
| 223744        | 4_62  | 5wayCG_Leptoll_Contig11277_GENE_246 | Put. methyl-accepting chemotaxis sensory transducer C    | T    | T      | 10 | 1  | G/E  |              |                                    |           |
| 226532        | 4_60  | 5wayCG_Leptoll_Contig11277_GENE_248 | Putative signal transduction histidine kinase (CheA)     | C    | *      | 15 | 1  |      | split        |                                    |           |
| 227443        | 4_60  | 5wayCG_Leptoll_Contig11277_GENE_248 | Putative signal transduction histidine kinase (CheA)     | A    | G      | 15 | 1  |      | synonymous   |                                    |           |
| 230033        | 4_56  | 5wayCG_Leptoll_Contig11277_GENE_252 | Protein of unknown function                              | G    | A      | 4  | 3  | R/C  |              |                                    |           |
| 234517        | 4_53  | 5wayCG_Leptoll_Contig11277_GENE_255 | Flagellar biosynthesis protein                           | G    | A      | 8  | 1  |      | synonymous   |                                    |           |
| 234588        | 4_53  | 5wayCG_Leptoll_Contig11277_GENE_255 | Flagellar biosynthesis protein                           | A    | G      | 8  | 1  | F/L  |              |                                    |           |
| 235604        | 4_52  | 5wayCG_Leptoll_Contig11277_GENE_256 | Flagellar biosynthesis protein                           | C    | *      | 10 | 1  |      | split        |                                    |           |
| 236069        |       |                                     | Intergenic                                               | G    | A      | 13 | 1  |      | Intergenic   |                                    |           |
| 236401        | 4_50  | 5wayCG_Leptoll_Contig11277_GENE_258 | Flagellar biosynthesis protein FlIP                      | T    | C      | 9  | 1  |      | synonymous   |                                    |           |
| 238023        | 4_47  | 5wayCG_Leptoll_Contig11277_GENE_261 | Putative flagellar basal body-associated protein FlIL    | T    | *      | 15 | 1  |      | split        |                                    |           |
| 241642        | 4_44  | 5wayCG_Leptoll_Contig11277_GENE_264 | Conserved protein of unknown function                    | G    | A      | 6  | 2  |      | synonymous   |                                    |           |
| 244834        | 4_40  | 5wayCG_Leptoll_Contig11277_GENE_268 | Protein of unknown function                              | C    | *      | 10 | 1  |      | shift change |                                    |           |
| 246423        | 4_38  | 5wayCG_Leptoll_Contig11277_GENE_270 | Flagellar M-ring protein FlIF                            | C    | *      | 10 | 1  |      | split        |                                    |           |
| 248665        | 4_36  | 5wayCG_Leptoll_Contig11277_GENE_272 | Flagellar basal-body rod protein FlgC                    | G    | A      | 11 | 1  |      | synonymous   |                                    |           |
| 250960        | 4_33  | 5wayCG_Leptoll_Contig11277_GENE_275 | Put. PAS/PAC sensor signal transduction histidine kinase | C    | T      | 15 | 1  | V/I  |              |                                    |           |
| 259087        | 4_25  | 5wayCG_Leptoll_Contig11277_GENE_283 | Glycine dehydrogenase (Decarboxylating) subunit 2        | G    | *      | 20 | 1  |      | split        |                                    |           |
| 259186        | 4_25  | 5wayCG_Leptoll_Contig11277_GENE_283 | Glycine dehydrogenase (Decarboxylating) subunit 2        |      | unit 2 |    |    |      | XYG62706.g1  | Recombinant read, but not UBA type |           |
| 259385        | 4_25  | 5wayCG_Leptoll_Contig11277_GENE_283 | Glycine dehydrogenase (Decarboxylating) subunit 2        | C    | T      | 14 | 1  | G/R  | split        |                                    |           |
| 262017        | 4_23  | 5wayCG_Leptoll_Contig11277_GENE_285 | Glycine cleavage system H protein                        | CAGG | **G*   | 12 | 1  | L/*  |              |                                    |           |
| 263856        |       |                                     | Intergenic                                               | C    | T      | 24 | 2  |      | Intergenic   |                                    |           |
| 265110        | 4_20  | 5wayCG_Leptoll_Contig11277_GENE_288 | Put. methyl-accepting chemotaxis sensory transducer G    | G    | A      | 10 | 1  | S/L  |              |                                    |           |
| 266067        | 4_20  | 5wayCG_Leptoll_Contig11277_GENE_288 | Put. methyl-accepting chemotaxis sensory transducer G    | G    | A      | 10 | 3  | A/ V |              |                                    |           |
| 266298        | 4_19  | 5wayCG_Leptoll_Contig11277_GENE_289 | Put. methyl-accepting chemotaxis sensory transducer G    | G    | A      | 19 | 1  |      | synonymous   |                                    |           |
| 266878        | 4_18  | 5wayCG_Leptoll_Contig11277_GENE_290 | Protein of unknown function                              | G    | A      | 12 | 3  | A/ V |              |                                    |           |
| Contig 11184  |       |                                     |                                                          |      |        |    |    |      |              |                                    |           |
| 2985          | 4_10  | 5wayCG_Leptoll_Contig11184_GENE_3   | Protein of unknown function                              | G    | *      | 12 | 1  |      | split        |                                    |           |
| 3725          |       |                                     | Intergenic                                               | C    | A      | 15 | 1  |      | Intergenic   |                                    |           |
| 6136          | 4_6   | 5wayCG_Leptoll_Contig11184_GENE_7   | Probable short-chain dehydrogenase/reductase SDR         | T    | C      | 10 | 1  | R/G  |              |                                    |           |
| 12919         | 59_29 | 5wayCG_Leptoll_Contig11184_GENE_12  | Probable outer membrane efflux protein                   | C    | A      | 9  | 1  | E/D  |              |                                    |           |
| 14399         | 59_28 | 5wayCG_Leptoll_Contig11184_GENE_13  | Protein of unknown function                              | A    | T      | 14 | 2  |      | synonymous   |                                    |           |
| 19314-193115  | 59_21 | 5wayCG_Leptoll_Contig11184_GENE_20  | DNA polymerase III subunit gamma/tau (EC 2.7.7.7)        | AA   | **     | 15 | 1  |      | split        |                                    |           |
| 23171         | 59_17 | 5wayCG_Leptoll_Contig11184_GENE_24  | Putative mechanosensitive ion channel                    | C    | *      | 12 | 1  | K/Q  | split        |                                    |           |
| 29609         | 59_11 | 5wayCG_Leptoll_Contig11184_GENE_30  | Probable glycosyl transferase family protein             | G    | *      | 16 | 1  |      | split        |                                    |           |
| 55894         | 3_11  | 5wayCG_Leptoll_Contig11184_GENE_54  | Dephospho-CoA kinase (EC 2.7.1.24)                       | T    | C      | 6  | 7  | M/I  |              |                                    |           |
| 57986         | 3_14  | 5wayCG_Leptoll_Contig11184_GENE_57  | DNA polymerase I (EC 2.7.7.7)                            | T    | *      | 16 | 1  |      | split        |                                    |           |
| 71864         | 3_27  | 5wayCG_Leptoll_Contig11184_GENE_69  | Glutamate 5-kinase (EC 2.7.2.11)                         | C    | T      | 9  | 8  |      | synonymous   |                                    |           |
| Contig 11181  |       |                                     |                                                          |      |        |    |    |      |              |                                    |           |
| 1177          | 3_34  | 5wayCG_Leptoll_Contig11181_GENE_1   | Protein of unknown function                              | G    | A      | 13 | 2  | S/L  |              |                                    |           |

|              |        |                                    |                                                       |                  |                |    |   |     |            |                               |
|--------------|--------|------------------------------------|-------------------------------------------------------|------------------|----------------|----|---|-----|------------|-------------------------------|
| 8245         | 3_41   | 5wayCG_Leptoll_Contig11181_GENE_7  | Ribosomal protein L20                                 | C                | A              | 10 | 2 | A/S |            |                               |
| 8744         | 3_43   | 5wayCG_Leptoll_Contig11181_GENE_9  | Translation initiation factor 3 (IF-3)                | G                | A              | 9  | 2 | P/L |            |                               |
| 14113        | 3_45   | 5wayCG_Leptoll_Contig11181_GENE_11 | Putative diguanylate cyclase/phosphodiesterase        | A                | C              | 13 | 3 | W/G |            |                               |
| 15310        | 3_45   | 5wayCG_Leptoll_Contig11181_GENE_11 | Putative diguanylate cyclase/phosphodiesterase        | G                | A              | 13 | 4 | R/W | Strain 14  | Strain 14                     |
| 15468        | 3_45   | 5wayCG_Leptoll_Contig11181_GENE_11 | Putative diguanylate cyclase/phosphodiesterase        | G                | A              | 13 | 1 | T/M |            |                               |
| 15491        | 3_45   | 5wayCG_Leptoll_Contig11181_GENE_11 | Putative diguanylate cyclase/phosphodiesterase        | G                | *              | 12 | 2 |     | split      |                               |
| 18957        | 3_49   | 5wayCG_Leptoll_Contig11181_GENE_15 | Thiazole biosynthesis protein (ThiG)                  | *                | C              | 13 | 2 |     | split      | Strain 14                     |
| 22115        | 3_51   | 5wayCG_Leptoll_Contig11181_GENE_18 | Putative glyoxalase (GloA)                            | C                | A              | 17 | 1 |     | synonymous |                               |
| 25763        | 3_54   | 5wayCG_Leptoll_Contig11181_GENE_21 | Putative metallophosphoesterase                       | G                | A              | 11 | 5 | V/I |            |                               |
| 25777-25778  | 3_55   | 5wayCG_Leptoll_Contig11181_GENE_22 | Probable major facilitator superfamily transporter    | TG               | AT             | 17 | 1 | H/I |            |                               |
| 27498        | 3_56   | 5wayCG_Leptoll_Contig11181_GENE_23 | Carboxymethylenebutenolidase (EC 3.1.1.45)            | C                | *              | 11 | 1 |     | split      |                               |
| 29458        | 3_57   | 5wayCG_Leptoll_Contig11181_GENE_24 | Putative outer membrane protein                       | T                | G              | 12 | 2 | Q/P |            |                               |
| 29986        | 3_58   | 5wayCG_Leptoll_Contig11181_GENE_25 | Protein of unknown function                           | G                | A              | 19 | 1 |     | synonymous |                               |
| 31469        | 3_59   | 5wayCG_Leptoll_Contig11181_GENE_26 | Put. periplasmic signal transduction histidine kinase | G                | A              | 16 | 1 | T/I |            |                               |
| 36920        | 3_65   | 5wayCG_Leptoll_Contig11181_GENE_32 | ATP synthase F1, beta subunit (EC 3.6.3.15)           | C                | T              | 13 | 2 | E/K |            |                               |
| 38628        | 3_67   | 5wayCG_Leptoll_Contig11181_GENE_34 | ATP synthase F1, alpha subunit (EC 3.6.3.15)          | A                | G              | 20 | 1 | I/T |            |                               |
| 43822        | 3_75   | 5wayCG_Leptoll_Contig11181_GENE_42 | Putative oligopeptide ABC transporter, permease       | G                | A              | 14 | 7 |     | synonymous |                               |
| 44365        | 3_75   | 5wayCG_Leptoll_Contig11181_GENE_42 | Putative oligopeptide ABC transporter, permease       | T                | G              | 20 | 1 | M/L |            |                               |
| 45272        | 3_76   | 5wayCG_Leptoll_Contig11181_GENE_43 | Putative oligopeptide ABC transporter, permease       | C                | G              | 22 | 1 | R/T |            |                               |
| 48356        | 3_79   | 5wayCG_Leptoll_Contig11181_GENE_46 | Triosephosphate isomerase (EC 5.3.1.1)                | G                | C              | 20 | 1 |     | synonymous |                               |
| 49219        | 3_80   | 5wayCG_Leptoll_Contig11181_GENE_47 | Phosphoglycerate kinase (EC 2.7.2.3)                  | A                | C              | 16 | 1 | V/G |            |                               |
| 53181-53192  | 3_82   | 5wayCG_Leptoll_Contig11181_GENE_49 | Peptidoglycan glycosyltransferase (EC 2.4.1.129)      | gagaaca<br>aggag | *****<br>***** |    |   |     | split      |                               |
| 60428        | 3_93   | 5wayCG_Leptoll_Contig11181_GENE_57 | Multi-sensor signal transduction histidine kinase     | *                | C              | 10 | 1 |     | split      |                               |
| 63961        | 3_95   | 5wayCG_Leptoll_Contig11181_GENE_59 | Protein of unknown function                           | G                | C              | 11 | 1 | A/G |            |                               |
| 68064        | 3_100  | 5wayCG_Leptoll_Contig11181_GENE_64 | Putative diguanylate phosphodiesterase                | G                | *              | 15 | 1 | R/Q | split      |                               |
| 69931        | 3_103  | 5wayCG_Leptoll_Contig11181_GENE_67 | Putative sulfide-quinone reductase                    | G                | T              | 16 | 1 | L/I |            |                               |
| 75332        | 147_11 | 5wayCG_Leptoll_Contig11181_GENE_72 | Probable helicase                                     | C                | G              | 15 | 1 |     | synonymous |                               |
| 79100-79101  | 147_9  | 5wayCG_Leptoll_Contig11181_GENE_74 | Putative metal-dependent phosphohydrolase             | CC               | **             | 11 | 1 |     | split      |                               |
| 79922        | 147_9  | 5wayCG_Leptoll_Contig11181_GENE_74 | Putative metal-dependent phosphohydrolase             | C                | T              | 11 | 1 |     | split      |                               |
| Contig 11386 |        |                                    |                                                       |                  |                |    |   |     |            |                               |
| 31346        | 26_8   | 5wayCG_Leptoll_Contig11386_GENE_24 | CRISPR-associated protein, Cas1                       | T                | A              | 17 | 1 |     |            |                               |
| 24829        | 26_13  | 5wayCG_Leptoll_Contig11386_GENE_20 | Hypothetical protein                                  | T                | *              | 4  | 4 |     | split      |                               |
| 22385-22386  | 26_15  | 5wayCG_Leptoll_Contig11386_GENE_18 | DNA methyltransferase/helicase                        | CC               | **             | 5  | 1 |     | split      |                               |
| 21734        | 26_15  | 5wayCG_Leptoll_Contig11386_GENE_18 | DNA methyltransferase/helicase                        | C                | A              | 3  | 2 | R/M |            |                               |
| 21116-21224  |        |                                    |                                                       |                  |                |    |   |     |            |                               |
| 18541        | 26_19  | 5wayCG_Leptoll_Contig11386_GENE_14 | Conserved hypothetical protein                        | A                | G              | 12 | 2 | S/G | XYG6763.b2 | Recombinant, but not UBA type |
| 18427        | 26_19  | 5wayCG_Leptoll_Contig11386_GENE_14 | Conserved hypothetical protein                        | T                | C              | 10 | 2 |     | synonymous | Strain 15                     |
| 18412        | 26_19  | 5wayCG_Leptoll_Contig11386_GENE_14 | Conserved hypothetical protein                        | A                | G              | 13 | 2 | I/V |            | Strain 15                     |
| 18400        | 26_19  | 5wayCG_Leptoll_Contig11386_GENE_14 | Conserved hypothetical protein                        | G                | A              | 12 | 2 | V/I |            | Strain 15</                   |

|              |             |                                       |                                                       |     |     |    |    |                           |                        |
|--------------|-------------|---------------------------------------|-------------------------------------------------------|-----|-----|----|----|---------------------------|------------------------|
| 56017        |             |                                       | intergenic                                            | G   | A   | 3  | 1  | intergenic                |                        |
| 38092-38093  | 26_31-26-33 | 5wayCG_Leptoll_Contig11389_GENE_40-42 | Genes spanning DnaA (origin)                          |     |     |    |    | Recomb (fig) to strain 19 | UBA-5wayCG recombinant |
| 34887        | 26_33       | 5wayCG_Leptoll_Contig11389_GENE_40    | Acetolactate synthase, large subunit (EC 2.2.1.6)     | T   | C   | 13 | 5  | synonymous                | Strain 19              |
| 34686        | 26_33       | 5wayCG_Leptoll_Contig11389_GENE_40    | Acetolactate synthase, large subunit (EC 2.2.1.6)     | A   | G   | 11 | 7  | synonymous                | Strain 19              |
| 34461        | 26_33       | 5wayCG_Leptoll_Contig11389_GENE_40    | Acetolactate synthase, large subunit (EC 2.2.1.6)     | C   | T   | 9  | 5  | synonymous                | Strain 19              |
| 34437        | 26_33       | 5wayCG_Leptoll_Contig11389_GENE_40    | Acetolactate synthase, large subunit (EC 2.2.1.6)     | G   | A   | 8  | 7  | synonymous                | Strain 19              |
| 34297        | 26_33       | 5wayCG_Leptoll_Contig11389_GENE_40    | Acetolactate synthase, large subunit (EC 2.2.1.6)     | G   | A   | 10 | 3  | synonymous                | Strain 19              |
| 33988        | 26_34       | 5wayCG_Leptoll_Contig11389_GENE_39    | Acetolactate synthase, small subunit                  | A   | G   | 4  | 2  | synonymous                | Strain 19              |
| 33769        | 26_34       | 5wayCG_Leptoll_Contig11389_GENE_39    | Acetolactate synthase, small subunit                  | C   | T   | 4  | 4  | synonymous                | Strain 19              |
| 33351        | 26_35       | 5wayCG_Leptoll_Contig11389_GENE_38    | Acetohydroxy acid isomeroreductase (EC 1.1.1.86)      | G   | *   | 13 | 1  | shift/split               |                        |
| 33236        | 26_35       | 5wayCG_Leptoll_Contig11389_GENE_38    | Acetohydroxy acid isomeroreductase (EC 1.1.1.86)      | G   | A   | 12 | 4  | synonymous                | Strain 19              |
| 33194        | 26_35       | 5wayCG_Leptoll_Contig11389_GENE_38    | Acetohydroxy acid isomeroreductase (EC 1.1.1.86)      | G   | A   | 11 | 4  | synonymous                | Strain 19              |
| 33093        | 26_35       | 5wayCG_Leptoll_Contig11389_GENE_38    | Acetohydroxy acid isomeroreductase (EC 1.1.1.86)      | C   | T   | 12 | 5  | G/E                       | Strain 19              |
| 32462        | 26_36       | 5wayCG_Leptoll_Contig11389_GENE_37    | Phosphatidylserine decarboxylase (EC 4.1.1.65)        | A   | G   | 12 | 8  | synonymous                | Strain 19              |
| 32375        | 26_36       | 5wayCG_Leptoll_Contig11389_GENE_37    | Phosphatidylserine decarboxylase (EC 4.1.1.65)        | C   | T   | 18 | 1  | synonymous                |                        |
| 30772        | 26_38       | 5wayCG_Leptoll_Contig11389_GENE_35    | 2-isopropylmalate synthase (EC 2.3.3.13) AA and pyruv | A   | G   | 9  | 13 | synonymous                | Strain 19              |
| 29101        | 26_39       | 5wayCG_Leptoll_Contig11389_GENE_34    | 3-isopropylmalate dehydrogenase (EC 1.1.1.85) AA bi A | C   | C   | 16 | 11 | synonymous                | Strain 19              |
| 28478        | 26_40       | 5wayCG_Leptoll_Contig11389_GENE_33    | Aspartate-semialdehyde dehydrogenase (EC 1.2.1.11 A   | G   |     | 15 | 1  | synonymous                |                        |
| 26174        |             |                                       | intergenic                                            | C   | A   | 15 | 1  | intergenic                |                        |
| 25924        | 26_43       | 5wayCG_Leptoll_Contig11389_GENE_30    | Protein of unknown function                           | G   | A   | 13 | 1  | R/Q                       |                        |
| 20508        | 80_25       | 5wayCG_Leptoll_Contig11389_GENE_23    | Cobalamin B12-binding/Radical SAM family protein      | G   | T   | 11 | 1  | V/F                       |                        |
| 18176        | 80_24       | 5wayCG_Leptoll_Contig11389_GENE_22    | Ribulose-bisphosphate carboxylase (EC 4.1.1.39)       | G   | A   | 24 | 1  | R/W                       |                        |
| 12105        | 80_17       | 5wayCG_Leptoll_Contig11389_GENE_15    | Putative ribosomal protein L11 methyltransferase      | A   | G   | 13 | 2  | synonymous                |                        |
| 7373         | 80_11       | 5wayCG_Leptoll_Contig11389_GENE_9     | Precorin-6B methyltransferase                         | A   | *   | 17 | 1  | split                     |                        |
| 5503         | 80_9        | 5wayCG_Leptoll_Contig11389_GENE_7     | Cobalamin biosynthesis protein (CblD)                 | C   | *   | 11 | 1  | split                     |                        |
| 6285-6286    | 214_4       | 5wayCG_Leptoll_Contig10706_GENE_6     | DNA helicase                                          | CA  | **  | 20 | 1  | L/I                       | split                  |
| Contig 11172 |             |                                       |                                                       |     |     |    |    |                           |                        |
| 1391         |             |                                       | intergenic                                            | T   | A   | 3  | 9  | intergenic                |                        |
| 2727         | 150_13      | 5wayCG_Leptoll_Contig11172_GENE_5     | Putative inner-membrane protein                       | T   | G   | 12 | 4  | synonymous                |                        |
| 5885         | 150_11      | 5wayCG_Leptoll_Contig11172_GENE_7     | Glucose-inhibited division protein A                  | G   | C   | 12 | 1  | V/L                       |                        |
| 8666         | 150_8       | 5wayCG_Leptoll_Contig11172_GENE_10    | ParB-like partition protein                           | C   | T   | 6  | 3  | synonymous                |                        |
| 16295        | 6_88a       | 5wayCG_Leptoll_Contig11172_GENE_18    | Protein of unknown function                           | T   | C   | 6  | 1  | V/A                       |                        |
| 27837-27839  | 6_77        | 5wayCG_Leptoll_Contig11172_GENE_31    | Pseudouridylate synthases, 23S RNA-specific           | TCC | *C* | 1  | 21 | split                     |                        |
| 29815        | 6_76        | 5wayCG_Leptoll_Contig11172_GENE_32    | Putative TPR-domain containing protein                | C   | A   | 18 | 1  | R/L                       |                        |
| 31290        | 6_74        | 5wayCG_Leptoll_Contig11172_GENE_34    | Isoleucyl-tRNA synthetase (EC 6.1.1.5)                | T   | C   | 16 | 1  | I/V                       |                        |
| 40618        | 48_36       | 5wayCG_Leptoll_Contig11172_GENE_42    | Putative aminoglycoside phosphotransferase            | G   | A   | 18 | 1  | E/K                       |                        |
| 40661        | 48_36       | 5wayCG_Leptoll_Contig11172_GENE_42    | Putative aminoglycoside phosphotransferase            | C   | T   | 16 | 2  | T/I                       |                        |
| 42451        | 48_34       | 5wayCG_Leptoll_Contig11172_GENE_44    | Protein of unknown function                           | T   | *   | 20 | 4  | split                     |                        |
| 43685        | 48_32       | 5wayCG_Leptoll_Contig11172_GENE_46    | Putative peptidyl-prolyl cis-trans isomerase          | C   | T   | 18 | 1  | D/N                       |                        |
| 47690        |             |                                       | intergenic                                            | A   | C   | 12 | 1  | intergenic                |                        |
| 48901        | 48_29       | 5wayCG_Leptoll_Contig11172_GENE_49    | Transcription-repair coupling factor                  | C   | T   | 20 | 2  | E/K                       |                        |
| 53009        |             |                                       | intergenic                                            | G   | T   | 10 | 7  | intergenic                |                        |
| 53894        |             |                                       | intergenic                                            | G   | *   | 9  | 1  | intergenic                |                        |
| 58537        | 48_16       | 5wayCG_Leptoll_Contig11172_GENE_61    | Pyruvate synthase alpha chain (EC 1.2.7.1)            | T   | C   | 16 | 1  | synonymous                |                        |
| 58922        | 48_16       | 5wayCG_Leptoll_Contig11172_GENE_61    | Pyruvate synthase alpha chain (EC 1.2.7.1)            | C   | *   | 14 | 1  | split                     |                        |
| 65013        |             |                                       | intergenic                                            | G   | A   | 6  | 1  | intergenic                |                        |
| 67338        | 48_5        | 5wayCG_Leptoll_Contig11172_GENE_71    | Putative heat shock protein DnaJ, N-terminal          | G   | A   | 4  | 2  | synonymous                | Strain 20              |
| 69832        | 48_3        | 5wayCG_Leptoll_Contig11172_GENE_73    | Chaperone clpB                                        | G   | C   | 8  | 3  | synonymous                | Strain 20              |
| 70180        | 48_3        | 5wayCG_Leptoll_Contig11172_GENE_73    | Chaperone clpB                                        | T   | C   | 7  | 4  | synonymous                | Strain 20              |
| 71044        | 48_2        | 5wayCG_Leptoll_Contig11172_GENE_74    | Probable bacterial regulatory protein, Fis family     | T   | G   | 2  | 1  | S/A                       |                        |
| 71081        | 48_2        | 5wayCG_Leptoll_Contig11172_GENE_74    | Probable bacterial regulatory protein, Fis family     | G   | A   | 2  | 1  | R/H                       |                        |
| Contig 11111 |             |                                       |                                                       |     |     |    |    |                           |                        |
| 117007       | 43_1        | 5wayCG_Leptoll_Contig11111_GENE_114   | Putative heavy metal efflux pump, CzcA family         | A   | g   | 10 | 5  | synonymous                |                        |
| 115373       | 43_3        | 5wayCG_Leptoll_Contig11111_GENE_112   | Protein of unknown function                           | T   | A   | 8  | 6  | D/E                       | Strain 21              |
| 115282       | 43_3        | 5wayCG_Leptoll_Contig11111_GENE_112   | Protein of unknown function                           | C   | T   | 8  | 7  | A/ V                      | Strain 21              |
| 114006       | 43_4        | 5wayCG_Leptoll_Contig11111_GENE_111   | Putative Xaa-Pro aminopeptidase                       | T   | C   | 13 | 1  | F/L                       |                        |
| 113650       | 43_5        | 5wayCG_Leptoll_Contig11111_GENE_110   | Probable O-methyltransferase family protein           | T   | C   | 11 | 6  | synonymous                | strain 22              |
| 112841       |             |                                       | intergenic                                            | G   | A   | 13 | 1  | synonymous                |                        |
| 111117       | 43_8        | 5wayCG_Leptoll_Contig11111_GENE_107   | Glucose-1-phosphate adenyltransferase (EC 2.7.7.27 A  | G   |     | 18 | 3  | synonymous                | strain 22              |
| 109424       | 43_9        | 5wayCG_Leptoll_Contig11111_GENE_106   | Putative glycoside hydrolase, family 57               | A   | G   | 18 | 5  | V/A                       | strain 22              |
| 109023       | 43_9        | 5wayCG_Leptoll_Contig11111_GENE_106   | Putative glycoside hydrolase, family 57               | G   | *   | 17 | 1  | split                     |                        |
| 108814       | 43_9        | 5wayCG_Leptoll_Contig11111_GENE_106   | Putative glycoside hydrolase, family 57               | C   | G   | 17 | 8  | synonymous                | strain 22              |
| 107510       | 43_10       | 5wayCG_Leptoll_Contig11111_GENE_105   | 4-alpha-glucanotransferase (EC 2.4.1.25)              | C   | A   | 17 | 5  | A/S                       | strain 22              |
| 104687       | 43_12       | 5wayCG_Leptoll_Contig11111_GENE_103   | Probable aldolase                                     | C   | T   | 14 | 7  | synonymous                | strain 22              |
| 104685       | 43_12       | 5wayCG_Leptoll_Contig11111_GENE_103   | Probable aldolase                                     | T   | G   | 12 | 6  | D/A                       | strain 22              |
| 103629       | 43_13       | 5wayCG_Leptoll_Contig11111_GENE_102   | Putative glycoside hydrolase, family 57               | C   | T   | 4  | 14 | synonymous                | strain 22              |
| 103359       | 43_13       | 5wayCG_Leptoll_Contig11111_GENE_102   | Putative glycoside hydrolase, family 57               | G   | A   | 5  | 19 | synonymous                | strain 22              |
| 103326       | 43_13       | 5wayCG_Leptoll_Contig11111_GENE_102   | Putative glycoside hydrolase, family 57               | C   | T   | 5  | 20 | synonymous                | strain 22              |
| 103317       | 43_13       | 5wayCG_Leptoll_Contig11111_GENE_102   | Putative glycoside hydrolase, family 57               | G   | T   | 5  | 20 | synonymous                | strain 22              |
| 103287       | 43_13       | 5wayCG_Leptoll_Contig11111_GENE_102   | Putative glycoside hydrolase, family 57               | C   | T   | 5  | 20 | synonymous                | strain 22              |
| 102717       | 43_13       | 5wayCG_Leptoll_Contig11111_GENE_102   | Putative glycoside hydrolase, family 57               | C   | A   | 3  | 15 | synonymous                | strain 22              |
| 92995        | 43_19       | 5wayCG_Leptoll_Contig11111_GENE_96    | Putative outer membrane efflux protein                | C   | T   | 11 | 1  | synonymous                |                        |
| 91118        | 43_20       | 5wayCG_Leptoll_Contig11111_GENE_95    | Thioredoxin reductase (EC 1.8.1.9)                    | A   | G   | 3  | 12 | synonymous                |                        |
| 90073        |             |                                       | intergenic                                            | A   | C   | 11 | 4  | intergenic                |                        |
| 89140        | 43_22       | 5wayCG_Leptoll_Contig11111_GENE_93    | Protein of unknown function                           | C   | T   | 12 | 1  | synonymous                |                        |
| 88574        | 43_22       | 5wayCG_Leptoll_Contig11111_GENE_93    | Protein of unknown function                           | C   | *   | 15 | 1  | split                     |                        |
| 87086        | 43_23       | 5wayCG_Leptoll_Contig11111_GENE_92    | Protein of unknown function                           | G   | T   | 26 | 2  | P/T                       |                        |
| 83658        | 43_28       | 5wayCG_Leptoll_Contig11111_GENE_87    | Putative peptidase, M48 family                        | C   | T   | 17 | 1  | M/I                       |                        |

|             |       |                                    |                                                    |    |    |    |    |       |             |           |                        |
|-------------|-------|------------------------------------|----------------------------------------------------|----|----|----|----|-------|-------------|-----------|------------------------|
| 82929       | 43_29 | 5wayCG_Leptoll_Contig11111_GENE_86 | Ribulose-phosphate 3-epimerase (EC 5.1.3.1)        | T  | *  | 13 | 1  |       | split       |           |                        |
| 81426       | 277_2 | 5wayCG_Leptoll_Contig11111_GENE_84 | Putative cell shape determining protein (MreB/Mri) | *  | C  | 16 | 1  |       | split       |           |                        |
| 80905-80906 | 277_2 | 5wayCG_Leptoll_Contig11111_GENE_84 | Putative cell shape determining protein (MreB/Mri) | GG | ** | 15 | 1  | SI/YS |             |           |                        |
| 78085       | 277_5 | 5wayCG_Leptoll_Contig11111_GENE_81 | Peptidoglycan glycosyltransferase (EC 2.4.1.129)   | G  | A  | 20 | 1  | P/L   |             |           |                        |
| 77739       | 277_5 | 5wayCG_Leptoll_Contig11111_GENE_81 | Peptidoglycan glycosyltransferase (EC 2.4.1.129)   | C  | T  | 20 | 1  |       | synonymous  |           |                        |
| 74950       | 277_7 | 5wayCG_Leptoll_Contig11111_GENE_79 | Ribonucleases G and E                              | T  | G  | 3  | 6  |       | synonymous  |           |                        |
| 73603       | 277_9 | 5wayCG_Leptoll_Contig11111_GENE_77 | Putative dihydroneopterin aldolase                 | T  | C  | 9  | 2  |       | synonymous  |           |                        |
| 73169       |       |                                    | intergenic                                         | T  | C  | 4  | 2  |       | intergenic  |           |                        |
| 70336       | 426_3 | 5wayCG_Leptoll_Contig11111_GENE_72 | Ribosomal protein L13                              | C  | T  | 2  | 5  |       | synonymous  |           |                        |
| 69479       | 426_5 | 5wayCG_Leptoll_Contig11111_GENE_70 | N-acetyl-gamma-glutamyl-phosphate reductase        | A  | G  | 19 | 11 |       | synonymous  | strain 23 | strain 23              |
| 69020       | 426_5 | 5wayCG_Leptoll_Contig11111_GENE_70 | N-acetyl-gamma-glutamyl-phosphate reductase        | G  | T  | 18 | 1  |       | synonymous  |           |                        |
| 68147       | 426_6 | 5wayCG_Leptoll_Contig11111_GENE_69 | Arginine biosynthesis protein (ArgJ) (EC 2.3.1.35) | C  | *  | 4  | 1  |       | split       |           |                        |
| 67993       | 426_6 | 5wayCG_Leptoll_Contig11111_GENE_69 | Arginine biosynthesis protein (ArgJ) (EC 2.3.1.35) | C  | T  | 6  | 2  | S/N   |             | strain 23 | strain 23              |
| 67902       | 426_6 | 5wayCG_Leptoll_Contig11111_GENE_69 | Arginine biosynthesis protein (ArgJ) (EC 2.3.1.35) | A  | G  | 9  | 3  |       | synonymous  | strain 23 | strain 23              |
| 66507       | 13_68 | 5wayCG_Leptoll_Contig11111_GENE_68 | Ribosomal protein S2                               | C  | *  | 7  | 1  |       | split/shift |           |                        |
| 65702       | 13_67 | 5wayCG_Leptoll_Contig11111_GENE_67 | Elongation factor Ts (EF-Ts)                       | A  | T  | 6  | 5  | F/L   |             | strain 24 | strain 24              |
| 65645       | 13_67 | 5wayCG_Leptoll_Contig11111_GENE_67 | Elongation factor Ts (EF-Ts)                       | G  | A  | 6  | 4  |       | synonymous  | strain 24 | strain 24              |
| 63443       | 13_64 | 5wayCG_Leptoll_Contig11111_GENE_64 | Alanine racemase (EC 5.1.1.1)                      | G  | T  | 4  | 13 | K/L   |             | strain 24 | strain 24              |
| 63350       | 13_64 | 5wayCG_Leptoll_Contig11111_GENE_64 | Alanine racemase (EC 5.1.1.1)                      | T  | C  | 6  | 13 |       | synonymous  | strain 24 | strain 24              |
| 63144       | 13_64 | 5wayCG_Leptoll_Contig11111_GENE_64 | Alanine racemase (EC 5.1.1.1)                      | G  | A  | 5  | 14 | L/S   |             | strain 24 | strain 24              |
| 62979       |       |                                    | intergenic                                         | C  | T  | 5  | 12 |       | intergenic  | strain 24 | strain 24              |
| 62661       | 13_63 | 5wayCG_Leptoll_Contig11111_GENE_63 | Putative integral membrane protein                 | C  | T  | 17 | 2  |       | synonymous  |           |                        |
| 62448       | 13_63 | 5wayCG_Leptoll_Contig11111_GENE_63 | Putative integral membrane protein                 | A  | G  | 6  | 11 |       | synonymous  | strain 24 | strain 24              |
| 61442       | 13_61 | 5wayCG_Leptoll_Contig11111_GENE_61 | Putative ABC transporter                           | G  | A  | 10 | 4  |       | synonymous  | strain 24 | strain 24              |
| 61271       | 13_61 | 5wayCG_Leptoll_Contig11111_GENE_61 | Putative ABC transporter                           | A  | G  | 11 | 6  |       | synonymous  | strain 24 | strain 24              |
| 60536       | 13_61 | 5wayCG_Leptoll_Contig11111_GENE_61 | Putative ABC transporter                           | A  | G  | 15 | 2  |       | synonymous  | strain 24 | strain 24              |
| 60185       | 13_61 | 5wayCG_Leptoll_Contig11111_GENE_61 | Putative ABC transporter                           | T  | C  | 13 | 2  |       | synonymous  | strain 24 | strain 24              |
| 60110       | 13_61 | 5wayCG_Leptoll_Contig11111_GENE_61 | Putative ABC transporter                           | A  | G  | 12 | 1  |       | synonymous  | strain 24 | strain 24              |
| 59471       | 13_60 | 5wayCG_Leptoll_Contig11111_GENE_60 | ResB-like family protein (poss cyt biosyn)         | G  | A  | 3  | 3  |       | synonymous  | strain 24 | strain 24              |
| 59150       | 13_60 | 5wayCG_Leptoll_Contig11111_GENE_60 | ResB-like family protein (poss cyt biosyn)         | A  | G  | 11 | 4  |       | synonymous  | strain 24 | strain 24              |
| 58089       |       |                                    | intergenic                                         | C  | A  | 12 | 3  |       | intergenic  | strain 24 | strain 24              |
| 57393       | 13_59 | 5wayCG_Leptoll_Contig11111_GENE_59 | Putative cytochrome c biogenesis protein           | G  | A  | 3  | 14 |       | split       | strain 24 | strain 24              |
| 52335       | 13_53 | 5wayCG_Leptoll_Contig11111_GENE_53 | Primosomal protein N' (PriA)                       | G  | *  | 23 | 1  |       | split/shift |           |                        |
| 50948       |       |                                    | intergenic                                         | C  | *  | 15 | 1  |       | intergenic  |           |                        |
| 49044       |       |                                    | intergenic                                         | C  | T  | 19 | 1  |       | intergenic  |           |                        |
| 45370       | 13_46 | 5wayCG_Leptoll_Contig11111_GENE_46 | Putative Ppx/GppA phosphatase family protein       | T  | C  | 4  | 12 |       | synonymous  | strain 25 | strain 25              |
| 44819       |       |                                    | intergenic                                         | T  | G  | 23 | 2  |       | intergenic  |           |                        |
| 44748       | 13_45 | 5wayCG_Leptoll_Contig11111_GENE_45 | Protein of unknown function                        | C  | A  | 19 | 7  |       | synonymous  | strain 25 | strain 25              |
| 44664       | 13_45 | 5wayCG_Leptoll_Contig11111_GENE_45 | Protein of unknown function                        | G  | A  | 17 | 7  |       | synonymous  | strain 25 | strain 25              |
| 44486       | 13_45 | 5wayCG_Leptoll_Contig11111_GENE_45 | Protein of unknown function                        | T  | *  | 23 | 2  |       | split/shift |           |                        |
| 44298       | 13_45 | 5wayCG_Leptoll_Contig11111_GENE_45 | Protein of unknown function                        | T  | C  | 6  | 20 |       | synonymous  | strain 25 | strain 25              |
| 42974-42975 | 13_44 | 5wayCG_Leptoll_Contig11111_GENE_44 | Ubiquinone/menaquinone biosyn. methyltransferase   | AT | ** | 19 | 1  |       |             |           |                        |
| 41908       | 13_43 | 5wayCG_Leptoll_Contig11111_GENE_43 | Putative radical SAM family protein                | A  | G  | 19 | 2  |       | synonymous  | strain 25 | strain 25              |
| 40971       | 13_42 | 5wayCG_Leptoll_Contig11111_GENE_42 | Protein of unknown function                        | C  | T  | 7  | 9  | V/I   |             | strain 25 | strain 25              |
| 40384       | 13_41 | 5wayCG_Leptoll_Contig11111_GENE_41 | Putative 4-hydroxybenzoate polyprenyl transferase  | C  | G  | 15 | 6  | V/L   |             | strain 25 | strain 25              |
| 40220       | 13_35 | 5wayCG_Leptoll_Contig11111_GENE_36 | Acetylornithine aminotransferase (EC 2.6.1.11)     | T  | *  | 15 | 1  |       | shift       |           |                        |
| 36264       | 13_35 | 5wayCG_Leptoll_Contig11111_GENE_36 | Acetylornithine aminotransferase (EC 2.6.1.11)     | A  | G  | 19 | 1  |       | synonymous  |           |                        |
| 36225-36226 | 13_35 | 5wayCG_Leptoll_Contig11111_GENE_36 | Acetylornithine aminotransferase (EC 2.6.1.11)     |    |    |    |    |       | XYD6958.b1  |           | UBA-5wayCG recombinant |
| 35946       | 13_35 | 5wayCG_Leptoll_Contig11111_GENE_36 | Acetylornithine aminotransferase (EC 2.6.1.11)     | C  | T  | 15 | 1  |       | synonymous  |           |                        |
| 35128       | 13_34 | 5wayCG_Leptoll_Contig11111_GENE_35 | Ornithine carbamoyltransferase (EC 2.1.3.3)        | G  | A  | 12 | 9  |       | synonymous  | Strain 26 | Strain 26              |
| 34948       | 13_34 | 5wayCG_Leptoll_Contig11111_GENE_35 | Ornithine carbamoyltransferase (EC 2.1.3.3)        | C  | A  | 9  | 8  |       | synonymous  | Strain 26 | Strain 26              |
| 34765       | 13_34 | 5wayCG_Leptoll_Contig11111_GENE_35 | Ornithine carbamoyltransferase (EC 2.1.3.3)        | T  | A  | 11 | 11 |       | synonymous  | Strain 26 | Strain 26              |
| 34201       | 13_33 | 5wayCG_Leptoll_Contig11111_GENE_34 | Argininosuccinate synthase (EC 6.3.4.5)            | G  | A  | 12 | 12 |       | synonymous  | Strain 26 | Strain 26              |
| 33722       | 13_33 | 5wayCG_Leptoll_Contig11111_GENE_34 | Argininosuccinate synthase (EC 6.3.4.5)            | G  | T  | 19 | 2  | S/Y   |             | Strain 26 | Strain 26              |
| 33670-33275 | 13_33 | 5wayCG_Leptoll_Contig11111_GENE_34 | Argininosuccinate synthase (EC 6.3.4.5)            |    |    |    |    |       | XYD24967.x1 |           | UBA-5wayCG recombinant |
| 33043       | 13_32 | 5wayCG_Leptoll_Contig11111_GENE_33 | Argininosuccinate lyase (EC 4.3.2.1)               | G  | A  | 26 | 1  | R/W   |             |           |                        |
| 32986       | 13_32 | 5wayCG_Leptoll_Contig11111_GENE_33 | Argininosuccinate lyase (EC 4.3.2.1)               | T  | *  | 25 | 1  |       | split/shift |           |                        |
| 32477       | 13_32 | 5wayCG_Leptoll_Contig11111_GENE_33 | Argininosuccinate lyase (EC 4.3.2.1)               | T  | A  | 11 | 16 |       | synonymous  | Strain 27 | Strain 27              |
| 32399       | 13_32 | 5wayCG_Leptoll_Contig11111_GENE_33 | Argininosuccinate lyase (EC 4.3.2.1)               | G  | A  | 10 | 17 |       | synonymous  | Strain 27 | Strain 27              |
| 31074       | 13_31 | 5wayCG_Leptoll_Contig11111_GENE_32 | Diaminopimelate decarboxylase (EC 4.1.1.20)        | C  | T  | 13 | 1  |       | synonymous  | Strain 27 | Strain 27              |
| 29972       | 13_30 | 5wayCG_Leptoll_Contig11111_GENE_31 | Protein of unknown function                        | T  | G  | 8  | 3  |       | synonymous  | Strain 27 | Strain 27              |
| 29054       | 13_29 | 5wayCG_Leptoll_Contig11111_GENE_30 | Dihydrodipicolinate synthase (EC 4.2.1.52)         | G  | A  | 17 | 1  | A/ V  |             | Strain 28 | Strain 28              |
| 28088       | 13_27 | 5wayCG_Leptoll_Contig11111_GENE_28 | 5-carboxymethyl-2-hydroxymuconate delta-isomerase  | T  | *  | 10 | 2  |       | synonymous  | Strain 28 | Strain 28              |
| 26646       | 13_26 | 5wayCG_Leptoll_Contig11111_GENE_27 | Putative flagellar basal body rod protein          | G  | C  | 10 | 3  |       | synonymous  | Strain 28 | Strain 28              |
| 23985       | 13_22 | 5wayCG_Leptoll_Contig11111_GENE_23 | Putative flagellar P-ring protein                  | A  | C  | 5  | 10 |       | synonymous  | Strain 28 | Strain 28              |
| 23973       | 13_22 | 5wayCG_Leptoll_Contig11111_GENE_23 | Putative flagellar P-ring protein                  | C  | T  | 5  | 10 |       | synonymous  | Strain 28 | Strain 28              |
| 23086       | 13_22 | 5wayCG_Leptoll_Contig11111_GENE_23 | Putative flagellar P-ring protein                  | T  | C  | 8  | 13 | S/N   |             | Strain 28 | Strain 28              |
| 23063       | 13_21 | 5wayCG_Leptoll_Contig11111_GENE_22 | Conserved hypothetical protein                     | A  | G  | 6  | 5  | F/S   |             | Strain 28 | Strain 28              |
| 22801       | 13_21 | 5wayCG_Leptoll_Contig11111_GENE_22 | Conserved hypothetical protein                     | G  | T  | 4  | 4  | N/K   |             |           |                        |
| 22115       | 13_20 | 5wayCG_Leptoll_Contig11111_GENE_21 | Putative flagellin                                 | G  | C  | 4  | 10 |       | synonymous  |           |                        |
| 22004       | 13_20 | 5wayCG_Leptoll_Contig11111_GENE_21 | Putative flagellin                                 | G  | A  | 13 | 1  |       | synonymous  |           |                        |
| 20265       | 13_17 | 5wayCG_Leptoll_Contig11111_GENE_18 | Flagellar hook-associated protein (FlgK)           | C  | T  | 5  | 2  |       | synonymous  |           |                        |
| 19708       | 13_17 | 5wayCG_Leptoll_Contig11111_GENE_18 | Flagellar hook-associated protein (FlgK)           | A  | G  | 6  | 8  | A/ V  |             |           |                        |
| 19699       | 13_17 | 5wayCG_Leptoll_Contig11111_GENE_18 | Flagellar hook-associated protein (FlgK)           | C  | T  | 5  | 8  | N/S   |             |           |                        |
| 19673       | 13_17 | 5wayCG_Leptoll_Contig11111_GENE_18 | Flagellar hook-associated protein (FlgK)           | *  | C  | 11 | 1  |       | split       |           |                        |
| 16960       | 13_13 | 5wayCG_Leptoll_Contig11111_GENE_14 | Putative flagellin                                 | G  | A  | 13 | 9  |       | synonymous  | Strain 28 | Strain 28              |
| 16765       | 13_13 | 5wayCG_Leptoll_Contig11111_GENE_14 | Putative flagellin                                 | A  | C  | 12 | 4  | S/A   |             | Strain 28 | Strain 28              |
| 16412       |       |                                    | intergenic                                         | A  | C  | 12 | 2  |       | intergenic  | Strain 28 | Strain 28              |

|           |       |                                    |                                                   |              |                           |    |    |       |            |           |           |
|-----------|-------|------------------------------------|---------------------------------------------------|--------------|---------------------------|----|----|-------|------------|-----------|-----------|
| 15960     | 13_12 | 5wayCG_Leptoll_Contig11111_GENE_13 | Putative flagellar hook-associated protein (FlID) | C            | *                         | 13 | 1  |       | split      |           |           |
| 15556     | 13_12 | 5wayCG_Leptoll_Contig11111_GENE_13 | Putative flagellar hook-associated protein (FlID) | A            | G                         | 14 | 6  | F/S   |            | Strain 28 | Strain 28 |
| 14321     | 13_10 | 5wayCG_Leptoll_Contig11111_GENE_11 | Hypothetical                                      | G            | A                         | 5  | 15 |       | synonymous | Strain 28 | Strain 28 |
| 14318     | 13_10 | 5wayCG_Leptoll_Contig11111_GENE_11 | Hypothetical                                      | C            | T                         | 5  | 15 |       | synonymous | Strain 28 | Strain 28 |
| 13951     |       |                                    | intergenic                                        | A            | C                         | 4  | 17 |       | intergenic | Strain 28 | Strain 28 |
| 13610     | 13_9  | 5wayCG_Leptoll_Contig11111_GENE_10 | Conserved protein of unknown function             | T            | A                         | 5  | 12 | F/Y   |            | Strain 28 | Strain 28 |
| 11967     | 13_8  | 5wayCG_Leptoll_Contig11111_GENE_9  | Putative SAM-dependent methyltransferases         | G            | A                         | 13 | 7  |       | synonymous | Strain 28 | Strain 28 |
| 11675     | 13_8  | 5wayCG_Leptoll_Contig11111_GENE_9  | Putative SAM-dependent methyltransferases         | C            | T                         | 13 | 7  | I/ V  |            | Strain 28 | Strain 28 |
| 11546     | 13_8  | 5wayCG_Leptoll_Contig11111_GENE_9  | Putative SAM-dependent methyltransferases         | C            | *                         | 18 | 1  |       | split      |           |           |
| 11235     | 13_8  | 5wayCG_Leptoll_Contig11111_GENE_9  | Putative SAM-dependent methyltransferases         | A            | G                         | 5  | 4  |       | synonymous | Strain 28 | Strain 28 |
| 11166     | 13_8  | 5wayCG_Leptoll_Contig11111_GENE_9  | Putative SAM-dependent methyltransferases         | C            | A                         | 5  | 10 |       | synonymous | Strain 28 | Strain 28 |
| 11004     | 13_8  | 5wayCG_Leptoll_Contig11111_GENE_9  | Putative SAM-dependent methyltransferases         | A            | C                         | 5  | 10 |       | synonymous | Strain 28 | Strain 28 |
| 10141     | 13_7  | 5wayCG_Leptoll_Contig11111_GENE_8  | Putative heptosyltransferase family protein       | C            | T                         | 9  | 5  |       | synonymous | Strain 28 | Strain 28 |
| 10064     | 13_7  | 5wayCG_Leptoll_Contig11111_GENE_8  | Putative heptosyltransferase family protein       | T            | G                         | 7  | 4  | E/A   |            | Strain 28 | Strain 28 |
| 9906      | 13_7  | 5wayCG_Leptoll_Contig11111_GENE_8  | Putative heptosyltransferase family protein       | A            | G                         | 5  | 3  |       | synonymous | Strain 28 | Strain 28 |
| 9832      | 13_7  | 5wayCG_Leptoll_Contig11111_GENE_8  | Putative heptosyltransferase family protein       | *            | C                         | 8  | 1  |       | split      |           |           |
| 8910      | 13_6  | 5wayCG_Leptoll_Contig11111_GENE_6  | Conserved hypothetical protein                    | C            | G                         | 12 | 6  |       | synonymous | Strain 28 | Strain 28 |
| 8804-8815 | 13_6  | 5wayCG_Leptoll_Contig11111_GENE_6  | Conserved hypothetical protein                    | ctatcctatcct | ctatcct***** **a***tatcct | 1  | 9  | 5 S/I | shift      | Strain 28 | Strain 28 |
| 8787      | 13_6  | 5wayCG_Leptoll_Contig11111_GENE_6  | Conserved hypothetical protein                    | C            | G                         | 10 | 5  | A/P   |            | Strain 28 | Strain 28 |
| 8499      | 13_6  | 5wayCG_Leptoll_Contig11111_GENE_6  | Conserved hypothetical protein                    | A            | T                         | 8  | 3  | W/R   |            | Strain 28 | Strain 28 |
| 8196      | 13_6  | 5wayCG_Leptoll_Contig11111_GENE_6  | Conserved hypothetical protein                    | C            | A                         | 10 | 5  | A/S   |            | Strain 28 | Strain 28 |
| 8026      | 13_6  | 5wayCG_Leptoll_Contig11111_GENE_6  | Conserved hypothetical protein                    | C            | A                         | 9  | 3  |       | synonymous | Strain 28 | Strain 28 |
| 6936      | 13_5  | 5wayCG_Leptoll_Contig11111_GENE_5  | Probable heptosyltransferase family protein       | C            | A                         | 8  | 1  | R/L   |            |           |           |
| 6630      | 13_5  | 5wayCG_Leptoll_Contig11111_GENE_5  | Probable heptosyltransferase family protein       | T            | *                         | 13 | 1  |       | split      |           |           |
| 4032      | 13_3  | 5wayCG_Leptoll_Contig11111_GENE_2  | Hypothetical                                      | T            | C                         | 13 | 3  |       | synonymous | Strain 29 | Strain 29 |
| 3125      | 13_3  | 5wayCG_Leptoll_Contig11111_GENE_2  | Hypothetical                                      | C            | T                         | 11 | 5  | R/H   |            | Strain 29 | Strain 29 |
