# Supplementary material
Source: PubMed Central journal article supplement (PMC2486301)
Supplement: pbio.0060177.st004.pdf [file pbio.0060177.st004.pdf]

| Quality cutoff                     | P(error) | Segrep/<br>Segsil | Fixrep/<br>Fixsil | Segrep | Segsil sites | Total | Exp<br>Segrep/Segsil* | pN/pS | dN/dS |
|------------------------------------|----------|-------------------|-------------------|--------|--------------|-------|-----------------------|-------|-------|
| 0                                  | 1        | 3.14              | 0.59              | 1950   | 622          | 2572  |                       | 1.09  | 0.21  |
| 10                                 | 1.0E-01  | 2.43              | 0.56              | 630    | 259          | 889   | 13.6                  | 0.85  | 0.20  |
| 20                                 | 1.0E-02  | 1.12              | 0.53              | 130    | 116          | 246   | 4.51                  | 0.39  | 0.18  |
| 25                                 | 3.2E-03  | 1.12              | 0.52              | 118    | 105          | 223   | 1.06                  | 0.39  | 0.18  |
| 30                                 | 1.0E-03  | 1.03              | 0.52              | 104    | 101          | 205   | 1.07                  | 0.36  | 0.18  |
| 40                                 | 1.0E-04  | 1.03              | 0.53              | 96     | 93           | 189   | 0.98                  | 0.36  | 0.18  |
| 50                                 | 1.0E-05  | 1.16              | 0.52              | 78     | 67           | 145   | 0.85                  | 0.41  | 0.18  |
| 25, replicated<br>only, all depths | 3.2E-03  | 1.54              | 0.53              | 40     | 26           | 66    |                       | 0.54  | 0.18  |
| 25, depth > 3                      | 3.2E-03  | 1.31              | 0.55              | 106    | 81           | 187   |                       | 0.46  | 0.19  |
| 25, depth > 4                      | 3.2E-03  | 1.28              | 0.49              | 95     | 74           | 169   |                       | 0.45  | 0.19  |

Table S4: The results of MK tests for Phred quality score cutoffs of 20 and higher are nearly identical, as indicated here by the similarity in ratios of segregating replacement to silent sites and fixed replacement to fixed silent sites for cutoff scores higher than 20. The use of replicated SNPs only or sites at higher coverage levels only also does not affect the outcome. \*, Expected ratio of segregating replacement to segregating sites if 2/3 of masked sites are replacement and 1/3 are silent. The effect of increasing the minimum required coverage depth for a quality score cutoff of 25 is shown in the bottom three rows.
